# Supplementary material for: Ecology of sleeping: the microbial and arthropod associates of chimpanzee beds
Source: R Soc Open Sci. 2018 May 16;5(5):180382. doi: 10.1098/rsos.180382 (PMC5990838; doi:10.1098/rsos.180382)
Supplement: Table S1. OTUs removed prior to rarefication and analyses. [file rsos180382supp2.xlsx]

## Sheet: filtered OTUs
#Thoemmes et al. 2018 Ecology of Sleeping: The Microbial and Arthropod Associates of Chimpanzee Beds. Royal Society Open Science
OTUId	Kingdom	Phylum	Class	Order	Family	Genus	Species	seq len	total seqs	% total seqs	10_BranchOut_34	11_BranchIn_41	12_BranchOut_41	13_BranchIn_6	14_BranchOut_6	15_BranchIn_18	16_BranchOut_18	17_BranchIn_26	18_BranchOut_26	19_BranchIn_31	1_BranchIn_30	20_BranchOut_31	21_BranchIn_23	22_BranchOut_23	23_BranchIn_27	24_BranchOut_27	25_BranchIn_13	26_BranchOut_13	27_BranchIn_40	28_BranchOut_40	29_BranchIn_4	2_BranchOut_30	30_BranchOut_4	31_BranchIn_17	32_BranchOut_17	33_BranchIn_15	34_BranchOut_15	35_BranchIn_5	36_BranchOut_5	37_BranchIn_24	38_BranchOut_24	39_BranchIn_9	3_BranchIn_25	40_BranchOut_9	41_BranchIn_3	42_BranchOut_3	43_BranchIn_14	44_BranchOut_14	45_BranchIn_11
OTU_34	Unassigned	Unassigned	Unassigned	Unassigned	Unassigned	Unassigned	Unassigned	333	22376	0.00724544	162	39	500	105	205	8	687	25	0	0	17	0	59	1087	17	0	391	645	1	62	190	14	391	293	57	120	547	6	19	501	190	219	36	855	272	301	1115	732	49
OTU_47	Unassigned	Unassigned	Unassigned	Unassigned	Unassigned	Unassigned	Unassigned	341	19860	0.00643075	150	6	1	37	5	746	2327	923	3	0	160	100	262	2314	1197	173	40	15	2	210	346	14	231	6	0	24	103	1	0	8	144	135	6	87	136	406	64	34	745
OTU_13	Unassigned	Unassigned	Unassigned	Unassigned	Unassigned	Unassigned	Unassigned	349	17817	0.00576922	441	0	0	6	0	40	3171	196	0	0	1	3	443	1060	0	364	40	13	1	30	1222	2	7	3	0	13	15	0	0	5	421	170	9	25	47	395	84	63	273
OTU_14	Unassigned	Unassigned	Unassigned	Unassigned	Unassigned	Unassigned	Unassigned	356	16665	0.00539619	199	8	66	33	1	29	1840	3	0	2	6	0	144	288	1	30	108	183	1	12	522	13	186	11	6	74	119	1	0	2	89	339	3	1285	184	220	328	345	710
OTU_51	Unassigned	Unassigned	Unassigned	Unassigned	Unassigned	Unassigned	Unassigned	319	12203	0.00395138	31	8	209	238	189	0	92	76	12	0	23	0	0	160	19	1	278	113	0	107	75	1	284	326	29	182	394	22	6	0	553	427	1	123	197	60	385	265	145
OTU_74	Unassigned	Unassigned	Unassigned	Unassigned	Unassigned	Unassigned	Unassigned	373	11713	0.00379272	59	0	0	0	0	959	254	2711	0	4	12	80	271	581	1096	18	18	4	2	102	32	13	13	16	0	12	18	0	0	3	98	7	15	0	11	14	0	0	77
OTU_23	Unassigned	Unassigned	Unassigned	Unassigned	Unassigned	Unassigned	Unassigned	344	8771	0.00284008	181	1	11	7	2	2	150	6	0	0	0	0	16	0	1	0	29	5	0	7	201	0	848	10	7	4	25	0	2	4	0	189	1	45	92	153	17	27	33
OTU_79	Unassigned	Unassigned	Unassigned	Unassigned	Unassigned	Unassigned	Unassigned	394	7105	0.00230063	134	4	2	12	0	8	457	24	0	0	3	0	24	2087	0	16	8	0	0	185	160	1	144	3	0	13	54	2	0	0	67	35	36	104	70	100	99	66	282
OTU_159	Unassigned	Unassigned	Unassigned	Unassigned	Unassigned	Unassigned	Unassigned	345	5986	0.00193829	46	0	0	0	0	3	272	10	0	0	2	0	3	4276	5	18	1	0	0	2	147	1	24	2	0	0	21	0	0	1	28	115	3	1	46	79	30	0	45
OTU_99	Unassigned	Unassigned	Unassigned	Unassigned	Unassigned	Unassigned	Unassigned	354	4642	0.0015031	26	0	0	1	0	20	29	398	0	0	115	25	95	969	912	40	0	0	0	24	8	1	2	0	0	6	5	0	0	3	37	66	3	0	0	15	0	0	0
OTU_7217	Unassigned	Unassigned	Unassigned	Unassigned	Unassigned	Unassigned	Unassigned	339	4540	0.00147007	53	0	0	0	0	65	390	220	2	0	66	8	93	329	240	62	3	1	0	25	152	1	78	0	0	2	17	0	0	4	35	20	3	10	77	83	5	1	42
OTU_114	Unassigned	Unassigned	Unassigned	Unassigned	Unassigned	Unassigned	Unassigned	331	3544	0.00114756	19	3	107	0	0	0	14	0	0	0	0	0	0	364	0	0	11	7	0	0	29	0	210	14	0	18	17	0	0	0	0	54	2	28	100	4	9	58	35
OTU_2157	Unassigned	Unassigned	Unassigned	Unassigned	Unassigned	Unassigned	Unassigned	333	3315	0.00107341	33	3	80	3	8	0	21	0	0	0	0	0	6	111	0	0	9	19	0	1	34	0	98	6	2	8	91	0	0	0	0	15	1	75	20	36	80	134	8
OTU_102	Unassigned	Unassigned	Unassigned	Unassigned	Unassigned	Unassigned	Unassigned	338	2861	0.000926403	12	0	0	5	0	22	846	126	0	0	7	0	56	9	8	107	5	1	0	3	211	3	6	0	0	12	5	0	0	0	23	6	0	0	33	65	16	4	0
OTU_152	Unassigned	Unassigned	Unassigned	Unassigned	Unassigned	Unassigned	Unassigned	351	2841	0.000919927	47	3	9	10	0	0	63	0	0	0	5	0	23	534	0	5	23	35	0	0	167	0	96	1	0	0	5	0	0	0	189	31	0	18	83	200	27	103	6
OTU_334	Unassigned	Unassigned	Unassigned	Unassigned	Unassigned	Unassigned	Unassigned	364	2798	0.000906004	252	1	0	6	0	0	105	25	4	0	0	0	8	155	0	24	0	0	0	0	169	0	109	0	0	0	23	0	1	1	3	113	22	18	18	113	0	0	0
OTU_6982	Unassigned	Unassigned	Unassigned	Unassigned	Unassigned	Unassigned	Unassigned	348	2422	0.000784253	56	0	0	0	0	100	517	207	16	2	1	65	0	153	27	108	0	5	0	22	3	4	1	0	0	4	15	0	0	0	21	0	2	2	7	9	1	0	0
OTU_458	Unassigned	Unassigned	Unassigned	Unassigned	Unassigned	Unassigned	Unassigned	333	2281	0.000738597	10	0	32	16	27	0	17	10	2	0	17	0	0	57	5	14	12	11	0	3	26	2	47	23	7	31	71	0	0	0	0	48	0	7	1	7	21	99	295
OTU_91	Unassigned	Unassigned	Unassigned	Unassigned	Unassigned	Unassigned	Unassigned	357	2155	0.000697798	190	0	0	0	0	15	661	0	1	0	9	0	5	120	0	43	3	3	0	23	31	0	67	0	0	2	0	0	0	0	0	3	0	0	0	2	7	30	22
OTU_1545	Unassigned	Unassigned	Unassigned	Unassigned	Unassigned	Unassigned	Unassigned	333	2151	0.000696502	22	3	73	4	4	0	39	2	0	0	0	0	0	55	0	0	103	41	0	18	3	1	38	27	1	28	116	1	5	0	0	41	3	119	11	13	140	129	1
OTU_125	Unassigned	Unassigned	Unassigned	Unassigned	Unassigned	Unassigned	Unassigned	338	2130	0.000689703	318	0	0	5	0	1	72	18	0	0	89	0	0	108	0	0	4	1	0	8	9	896	4	0	0	2	0	0	0	1	26	8	0	0	32	106	93	0	0
OTU_214	Unassigned	Unassigned	Unassigned	Unassigned	Unassigned	Unassigned	Unassigned	361	2053	0.00066477	0	0	0	0	0	15	22	754	1	4	70	13	0	13	769	15	0	0	0	1	1	0	0	0	0	0	0	0	0	0	8	0	0	0	0	0	0	0	0
OTU_136	Unassigned	Unassigned	Unassigned	Unassigned	Unassigned	Unassigned	Unassigned	334	1873	0.000606485	3	0	56	77	47	0	0	0	0	0	0	0	8	6	0	0	25	116	0	4	2	0	23	40	14	2	0	0	25	0	3	0	0	270	6	6	120	101	0
OTU_245	Unassigned	Unassigned	Unassigned	Unassigned	Unassigned	Unassigned	Unassigned	332	1869	0.00060519	0	0	120	8	41	0	0	0	0	0	0	0	1	61	8	0	35	20	0	0	4	0	108	80	6	3	106	1	10	0	0	16	0	0	0	0	64	61	0
OTU_250	Unassigned	Unassigned	Unassigned	Unassigned	Unassigned	Unassigned	Unassigned	349	1712	0.000554352	0	0	12	25	8	0	0	0	0	0	0	0	0	0	0	0	11	35	0	0	9	0	6	72	11	0	0	0	1	0	0	19	0	371	0	8	49	71	0
OTU_423	Unassigned	Unassigned	Unassigned	Unassigned	Unassigned	Unassigned	Unassigned	346	1696	0.000549172	0	0	74	2	163	0	0	0	0	0	3	0	0	23	1	0	9	59	0	4	0	2	24	24	5	3	9	6	13	0	0	2	0	18	7	0	98	96	0
OTU_252	Unassigned	Unassigned	Unassigned	Unassigned	Unassigned	Unassigned	Unassigned	337	1634	0.000529096	0	8	21	8	2	0	0	0	0	1	0	0	0	0	0	0	73	31	0	0	18	0	20	11	3	12	32	0	0	0	0	63	0	88	16	11	203	59	6
OTU_142	Unassigned	Unassigned	Unassigned	Unassigned	Unassigned	Unassigned	Unassigned	330	1519	0.000491858	6	0	1	7	2	0	8	0	0	0	0	0	0	0	0	0	2	0	0	13	52	0	76	2	3	38	67	0	0	0	0	18	0	36	18	3	10	32	15
OTU_310	Unassigned	Unassigned	Unassigned	Unassigned	Unassigned	Unassigned	Unassigned	369	1400	0.000453326	1	0	0	14	0	1	37	0	0	0	1085	0	0	0	0	0	1	0	0	0	0	14	0	0	0	3	14	0	0	0	0	14	0	0	2	1	2	0	52
OTU_238	Unassigned	Unassigned	Unassigned	Unassigned	Unassigned	Unassigned	Unassigned	332	1398	0.000452678	0	1	10	91	21	0	0	0	0	1	0	0	0	0	0	0	13	3	0	0	4	0	7	13	4	35	114	3	3	0	0	85	0	20	16	0	65	18	47
OTU_213	Unassigned	Unassigned	Unassigned	Unassigned	Unassigned	Unassigned	Unassigned	345	1343	0.000434869	7	0	0	79	4	0	24	158	0	0	0	0	0	6	0	7	0	4	0	78	71	7	6	0	0	5	13	0	0	0	0	36	0	0	50	45	0	13	75
OTU_298	Unassigned	Unassigned	Unassigned	Unassigned	Unassigned	Unassigned	Unassigned	376	1312	0.000424831	13	0	0	0	0	16	12	1015	1	0	15	0	0	46	0	0	0	0	0	12	3	0	2	0	0	0	2	0	0	0	10	4	0	0	2	30	0	0	4
OTU_418	Unassigned	Unassigned	Unassigned	Unassigned	Unassigned	Unassigned	Unassigned	349	1306	0.000422888	1	0	0	0	0	35	101	11	0	0	3	0	57	149	0	0	0	0	0	2	24	5	4	0	0	2	9	0	0	0	100	2	0	0	11	38	4	0	8
OTU_255	Unassigned	Unassigned	Unassigned	Unassigned	Unassigned	Unassigned	Unassigned	339	1241	0.000401841	3	1	31	47	61	0	0	0	0	0	0	0	0	6	0	0	59	28	0	3	1	0	3	130	10	2	63	9	8	0	2	11	0	29	44	1	19	14	0
OTU_220	Unassigned	Unassigned	Unassigned	Unassigned	Unassigned	Unassigned	Unassigned	331	1233	0.00039925	0	0	0	9	0	28	68	157	8	0	22	0	0	7	68	5	6	0	0	0	29	0	27	3	0	14	10	0	0	0	66	72	0	0	31	10	0	4	77
OTU_172	Unassigned	Unassigned	Unassigned	Unassigned	Unassigned	Unassigned	Unassigned	331	1174	0.000380146	0	0	0	0	0	28	15	2	0	0	114	0	24	0	54	0	6	0	0	0	0	5	0	3	0	0	0	0	0	4	0	12	0	0	0	0	15	0	0
OTU_329	Unassigned	Unassigned	Unassigned	Unassigned	Unassigned	Unassigned	Unassigned	335	1169	0.000378527	16	0	35	3	57	0	0	0	0	0	0	0	0	6	0	0	23	14	0	13	16	0	37	94	8	10	34	1	13	0	1	34	0	44	0	0	10	19	0
OTU_6696	Unassigned	Unassigned	Unassigned	Unassigned	Unassigned	Unassigned	Unassigned	333	1164	0.000376908	115	1	8	0	0	0	13	1	0	0	0	0	0	2	0	0	13	6	0	0	15	0	49	10	8	0	7	0	0	0	0	5	0	2	2	423	10	21	0
OTU_304	Unassigned	Unassigned	Unassigned	Unassigned	Unassigned	Unassigned	Unassigned	341	1117	0.000361689	0	3	57	25	247	0	1	0	0	0	0	0	0	0	0	0	22	16	0	0	0	0	1	69	28	0	11	7	42	0	0	0	0	40	0	0	15	33	0
OTU_7587	Unassigned	Unassigned	Unassigned	Unassigned	Unassigned	Unassigned	Unassigned	333	1115	0.000361041	10	3	28	0	23	1	2	0	0	0	0	0	0	0	0	0	14	100	0	0	0	0	5	5	14	0	7	0	3	0	0	0	0	213	0	0	54	39	0
OTU_262	Unassigned	Unassigned	Unassigned	Unassigned	Unassigned	Unassigned	Unassigned	338	1108	0.000358775	0	5	23	11	3	0	0	0	0	0	0	0	0	0	0	0	8	7	0	0	0	1	8	1	1	2	0	0	0	0	0	15	0	38	33	7	14	10	0
OTU_283	Unassigned	Unassigned	Unassigned	Unassigned	Unassigned	Unassigned	Unassigned	337	1091	0.00035327	2	0	44	9	4	0	0	0	0	0	0	0	0	0	0	0	50	12	0	0	6	0	8	1	0	1	18	0	0	0	0	2	0	79	3	0	124	112	5
OTU_370	Unassigned	Unassigned	Unassigned	Unassigned	Unassigned	Unassigned	Unassigned	344	1082	0.000350356	0	0	123	188	108	0	0	0	0	0	0	0	0	0	0	0	51	3	0	0	0	0	0	103	18	6	179	5	5	0	0	0	3	14	0	0	14	15	0
OTU_335	Unassigned	Unassigned	Unassigned	Unassigned	Unassigned	Unassigned	Unassigned	348	1018	0.000329632	0	4	6	0	0	0	0	1	0	0	0	0	0	0	0	0	0	0	0	0	0	0	40	99	8	0	0	0	0	0	0	0	0	262	0	0	4	5	0
OTU_526	Unassigned	Unassigned	Unassigned	Unassigned	Unassigned	Unassigned	Unassigned	351	990	0.000320566	0	2	18	16	1	0	0	0	0	0	0	0	0	0	0	0	6	2	0	0	2	0	4	31	5	0	5	0	0	0	0	4	0	164	0	18	22	17	0
OTU_506	Unassigned	Unassigned	Unassigned	Unassigned	Unassigned	Unassigned	Unassigned	340	986	0.000319271	0	1	81	0	161	0	0	0	0	0	0	0	0	6	0	0	8	20	0	0	0	0	0	2	0	0	8	0	0	0	0	0	0	23	0	0	100	128	0
OTU_356	Unassigned	Unassigned	Unassigned	Unassigned	Unassigned	Unassigned	Unassigned	361	982	0.000317976	1	2	0	0	2	3	5	0	0	0	0	0	0	10	0	0	0	0	0	0	17	0	267	0	0	0	0	0	0	0	0	41	0	81	39	229	0	0	50
OTU_424	Unassigned	Unassigned	Unassigned	Unassigned	Unassigned	Unassigned	Unassigned	340	960	0.000310852	0	0	55	0	0	0	0	0	0	0	0	0	0	0	0	0	0	38	0	0	0	0	0	6	2	0	15	0	0	0	0	0	0	4	0	0	124	80	0
OTU_208	Unassigned	Unassigned	Unassigned	Unassigned	Unassigned	Unassigned	Unassigned	332	918	0.000297252	0	0	11	0	72	0	0	0	1	0	0	0	0	0	0	0	13	42	0	0	0	0	0	211	21	0	0	11	44	0	0	0	0	18	0	0	64	12	0
OTU_234	Unassigned	Unassigned	Unassigned	Unassigned	Unassigned	Unassigned	Unassigned	330	917	0.000296928	0	0	61	4	66	0	0	0	0	0	0	0	0	0	0	0	15	8	0	0	0	0	114	84	4	0	12	14	20	0	0	24	0	9	1	0	44	32	0
OTU_494	Unassigned	Unassigned	Unassigned	Unassigned	Unassigned	Unassigned	Unassigned	338	899	0.0002911	9	0	0	0	0	0	0	0	0	0	0	2	30	0	0	0	0	0	0	5	0	1	0	3	0	0	0	0	0	0	16	0	0	0	0	0	0	4	0
OTU_741	Unassigned	Unassigned	Unassigned	Unassigned	Unassigned	Unassigned	Unassigned	330	893	0.000289157	0	0	37	6	0	0	56	0	0	0	0	0	2	88	0	0	12	12	0	0	31	0	53	6	0	7	3	0	0	0	0	0	0	0	8	0	5	64	28
OTU_513	Unassigned	Unassigned	Unassigned	Unassigned	Unassigned	Unassigned	Unassigned	370	844	0.000273291	2	0	0	22	15	3	0	39	6	1	14	3	10	5	31	1	5	0	0	5	1	5	0	19	0	3	0	2	0	3	23	198	4	28	6	9	9	5	20
OTU_804	Unassigned	Unassigned	Unassigned	Unassigned	Unassigned	Unassigned	Unassigned	341	775	0.000250948	1	0	43	8	26	0	0	0	0	0	0	0	0	0	0	0	18	29	0	0	0	0	36	28	8	3	1	0	0	0	0	4	0	24	8	0	131	28	0
OTU_275	Unassigned	Unassigned	Unassigned	Unassigned	Unassigned	Unassigned	Unassigned	342	731	0.000236701	0	0	17	7	0	0	0	0	0	0	0	0	0	10	0	0	3	2	0	0	7	0	11	0	2	6	16	0	0	0	0	2	0	0	3	0	0	12	102
OTU_604	Unassigned	Unassigned	Unassigned	Unassigned	Unassigned	Unassigned	Unassigned	337	717	0.000232167	7	2	15	9	5	0	0	0	0	0	0	0	0	0	0	0	14	12	0	0	29	0	33	5	3	2	4	0	0	0	0	20	4	39	27	9	29	37	0
OTU_749	Unassigned	Unassigned	Unassigned	Unassigned	Unassigned	Unassigned	Unassigned	349	697	0.000225691	0	0	39	34	16	0	0	0	0	0	0	0	0	0	0	0	13	10	0	1	0	0	0	52	26	0	0	1	3	0	0	4	0	15	0	0	14	34	0
OTU_258	Unassigned	Unassigned	Unassigned	Unassigned	Unassigned	Unassigned	Unassigned	335	690	0.000223425	0	0	0	0	0	0	0	0	0	2	0	2	0	0	0	0	0	0	0	0	0	0	0	0	0	0	0	0	0	0	0	0	0	0	0	1	0	0	0
OTU_382	Unassigned	Unassigned	Unassigned	Unassigned	Unassigned	Unassigned	Unassigned	341	690	0.000223425	0	0	22	0	0	0	0	0	0	0	0	0	0	0	0	0	7	20	0	0	5	0	0	4	0	0	12	0	0	0	0	20	0	89	0	0	64	24	3
OTU_336	Unassigned	Unassigned	Unassigned	Unassigned	Unassigned	Unassigned	Unassigned	330	682	0.000220834	3	0	0	0	0	5	9	0	0	0	0	0	0	23	0	0	5	1	0	0	76	0	0	0	0	0	9	0	0	0	27	54	11	1	3	12	13	6	3
OTU_7826	Unassigned	Unassigned	Unassigned	Unassigned	Unassigned	Unassigned	Unassigned	333	671	0.000217272	0	0	10	4	7	0	0	0	0	0	0	0	0	0	0	0	1	3	0	0	28	0	7	19	0	0	1	0	0	0	0	14	0	48	7	46	14	4	0
OTU_1835	Unassigned	Unassigned	Unassigned	Unassigned	Unassigned	Unassigned	Unassigned	339	663	0.000214682	4	0	0	0	0	0	2	0	0	0	0	0	17	0	0	0	0	0	0	16	0	0	0	0	0	0	0	1	0	0	0	0	0	0	1	6	0	0	0
OTU_433	Unassigned	Unassigned	Unassigned	Unassigned	Unassigned	Unassigned	Unassigned	347	644	0.00020853	0	0	0	0	0	0	0	137	0	0	45	0	8	3	168	0	0	0	0	0	0	0	0	0	0	0	0	0	0	0	0	0	0	0	0	1	0	0	0
OTU_463	Unassigned	Unassigned	Unassigned	Unassigned	Unassigned	Unassigned	Unassigned	363	619	0.000200435	0	0	0	0	0	0	4	0	0	0	0	0	0	0	0	0	0	0	0	0	0	0	0	0	0	0	0	0	20	0	0	9	0	11	0	25	0	0	0
OTU_673	Unassigned	Unassigned	Unassigned	Unassigned	Unassigned	Unassigned	Unassigned	332	614	0.000198816	0	0	0	0	0	60	33	134	0	0	0	3	0	0	46	1	0	0	0	0	2	0	0	0	0	0	0	0	0	0	31	3	0	0	0	94	0	0	0
OTU_1758	Unassigned	Unassigned	Unassigned	Unassigned	Unassigned	Unassigned	Unassigned	333	609	0.000197197	0	0	1	0	0	0	1	0	0	0	0	0	0	0	0	0	0	6	0	0	0	0	0	0	0	0	0	0	0	0	0	0	0	0	0	1	1	0	0
OTU_414	Unassigned	Unassigned	Unassigned	Unassigned	Unassigned	Unassigned	Unassigned	336	598	0.000193635	0	0	0	0	0	43	13	0	0	0	20	0	0	0	0	0	0	0	0	0	0	5	0	0	0	0	0	0	0	0	0	0	0	0	0	0	0	0	0
OTU_339	Unassigned	Unassigned	Unassigned	Unassigned	Unassigned	Unassigned	Unassigned	337	597	0.000193311	597	0	0	0	0	0	0	0	0	0	0	0	0	0	0	0	0	0	0	0	0	0	0	0	0	0	0	0	0	0	0	0	0	0	0	0	0	0	0
OTU_379	Unassigned	Unassigned	Unassigned	Unassigned	Unassigned	Unassigned	Unassigned	324	585	0.000189425	0	0	5	14	33	0	0	0	0	0	0	0	0	16	0	0	25	0	0	1	2	0	7	10	0	35	90	4	2	0	0	3	0	5	86	0	10	7	9
OTU_431	Unassigned	Unassigned	Unassigned	Unassigned	Unassigned	Unassigned	Unassigned	339	581	0.00018813	0	0	8	0	9	0	0	0	0	0	0	0	0	0	0	0	3	17	0	0	0	0	4	29	2	0	4	4	0	0	0	0	0	26	0	0	3	16	0
OTU_428	Unassigned	Unassigned	Unassigned	Unassigned	Unassigned	Unassigned	Unassigned	327	580	0.000187806	0	0	18	0	8	0	0	3	3	0	0	0	0	0	0	0	5	34	0	0	15	0	2	33	5	0	5	2	4	0	0	3	0	0	2	1	73	47	0
OTU_434	Unassigned	Unassigned	Unassigned	Unassigned	Unassigned	Unassigned	Unassigned	336	560	0.00018133	0	0	0	0	0	0	0	0	0	0	0	0	0	0	0	0	0	4	0	0	0	0	0	0	0	1	0	0	0	0	0	0	0	0	0	0	0	0	0
OTU_323	Unassigned	Unassigned	Unassigned	Unassigned	Unassigned	Unassigned	Unassigned	344	544	0.000176149	0	0	0	0	0	0	0	0	0	0	0	0	0	0	0	0	0	0	0	0	0	0	0	0	0	0	0	0	0	0	0	0	0	0	0	0	0	0	0
OTU_659	Unassigned	Unassigned	Unassigned	Unassigned	Unassigned	Unassigned	Unassigned	331	533	0.000172588	0	0	18	5	23	0	1	0	0	0	0	0	0	1	0	0	1	6	0	1	0	0	20	86	6	0	9	3	9	0	7	53	0	6	5	0	18	13	5
OTU_603	Unassigned	Unassigned	Unassigned	Unassigned	Unassigned	Unassigned	Unassigned	335	511	0.000165464	0	0	21	14	205	0	0	0	0	0	0	0	0	0	0	0	9	26	0	0	0	0	0	22	1	0	0	11	54	0	0	0	0	0	0	0	17	9	0
OTU_618	Unassigned	Unassigned	Unassigned	Unassigned	Unassigned	Unassigned	Unassigned	338	503	0.000162873	0	0	3	0	22	0	0	0	0	0	0	0	0	0	0	0	6	48	0	0	0	0	0	34	9	0	0	0	10	0	0	0	0	7	0	0	63	34	0
OTU_928	Unassigned	Unassigned	Unassigned	Unassigned	Unassigned	Unassigned	Unassigned	355	501	0.000162226	0	0	23	0	40	0	0	0	0	1	0	0	0	0	0	0	4	2	0	0	0	0	0	4	3	7	21	0	15	0	0	6	0	9	0	3	6	13	0
OTU_446	Unassigned	Unassigned	Unassigned	Unassigned	Unassigned	Unassigned	Unassigned	373	498	0.000161254	0	0	0	0	0	0	0	0	0	0	8	0	0	0	0	0	0	0	0	0	0	0	0	0	0	0	0	0	0	0	0	0	0	0	485	0	0	0	3
OTU_392	Unassigned	Unassigned	Unassigned	Unassigned	Unassigned	Unassigned	Unassigned	347	497	0.000160931	496	0	0	0	0	0	0	0	0	0	0	0	0	0	0	0	0	0	0	0	0	0	0	0	0	0	0	0	0	0	0	0	0	0	0	0	0	0	0
OTU_303	Unassigned	Unassigned	Unassigned	Unassigned	Unassigned	Unassigned	Unassigned	332	493	0.000159635	0	0	0	228	187	0	0	0	0	0	0	0	0	1	0	0	0	0	0	0	0	0	0	18	2	0	0	0	3	0	0	0	0	0	0	0	0	0	0
OTU_552	Unassigned	Unassigned	Unassigned	Unassigned	Unassigned	Unassigned	Unassigned	370	484	0.000156721	30	0	2	0	0	0	8	0	0	0	3	1	0	177	0	0	4	0	0	37	3	0	0	0	0	0	3	0	0	0	6	2	0	0	11	5	12	0	10
OTU_541	Unassigned	Unassigned	Unassigned	Unassigned	Unassigned	Unassigned	Unassigned	331	482	0.000156074	0	3	0	0	0	3	17	0	0	0	0	0	0	2	0	0	7	1	0	9	17	0	0	0	0	5	1	0	0	0	5	29	0	3	16	6	1	1	99
OTU_411	Unassigned	Unassigned	Unassigned	Unassigned	Unassigned	Unassigned	Unassigned	338	476	0.000154131	0	0	10	25	119	0	0	0	0	0	0	0	0	0	0	0	7	11	0	0	0	0	0	0	0	0	2	0	2	0	0	0	0	0	0	11	21	15	0
OTU_800	Unassigned	Unassigned	Unassigned	Unassigned	Unassigned	Unassigned	Unassigned	339	465	0.000150569	0	0	6	0	2	0	0	0	0	0	0	0	0	0	0	0	2	2	0	0	2	0	2	10	3	7	0	0	1	0	0	8	0	1	2	0	2	0	50
OTU_440	Unassigned	Unassigned	Unassigned	Unassigned	Unassigned	Unassigned	Unassigned	338	454	0.000147007	0	0	0	0	0	0	0	0	0	0	0	0	0	0	0	454	0	0	0	0	0	0	0	0	0	0	0	0	0	0	0	0	0	0	0	0	0	0	0
OTU_409	Unassigned	Unassigned	Unassigned	Unassigned	Unassigned	Unassigned	Unassigned	360	440	0.000142474	0	0	0	0	0	0	0	14	0	0	3	0	0	0	11	0	0	0	0	0	0	0	0	0	0	0	0	0	0	0	0	1	0	0	366	0	0	0	0
OTU_355	Unassigned	Unassigned	Unassigned	Unassigned	Unassigned	Unassigned	Unassigned	330	435	0.000140855	0	0	3	0	28	0	0	0	0	0	0	0	0	0	0	0	0	20	0	0	0	0	0	69	6	0	0	0	22	0	0	0	0	0	0	0	24	7	0
OTU_576	Unassigned	Unassigned	Unassigned	Unassigned	Unassigned	Unassigned	Unassigned	391	434	0.000140531	0	0	0	0	0	0	0	44	0	0	0	0	6	0	86	0	0	0	0	0	0	0	0	0	0	0	0	0	0	0	23	0	0	0	0	0	0	0	0
OTU_528	Unassigned	Unassigned	Unassigned	Unassigned	Unassigned	Unassigned	Unassigned	340	413	0.000133731	0	0	23	0	0	0	0	0	0	0	0	0	0	0	0	0	0	0	0	10	0	0	29	0	4	14	45	0	0	0	0	23	0	4	14	23	0	11	0
OTU_1059	Unassigned	Unassigned	Unassigned	Unassigned	Unassigned	Unassigned	Unassigned	325	407	0.000131788	0	0	0	0	29	0	0	0	0	0	0	0	0	0	0	0	0	12	0	0	0	0	0	1	1	0	0	36	312	0	0	0	0	0	0	0	3	0	0
OTU_1107	Unassigned	Unassigned	Unassigned	Unassigned	Unassigned	Unassigned	Unassigned	332	403	0.000130493	1	0	0	0	0	0	166	8	0	0	0	9	0	6	0	2	4	0	0	1	1	1	8	0	0	0	0	0	0	0	0	12	0	0	0	0	1	3	0
OTU_646	Unassigned	Unassigned	Unassigned	Unassigned	Unassigned	Unassigned	Unassigned	370	399	0.000129198	0	0	6	3	8	0	0	0	0	0	0	0	0	0	0	0	14	6	0	0	0	0	6	58	2	0	1	0	1	0	0	9	0	0	18	0	3	1	0
OTU_372	Unassigned	Unassigned	Unassigned	Unassigned	Unassigned	Unassigned	Unassigned	337	396	0.000128226	0	0	0	0	0	0	0	0	0	0	0	0	0	0	0	0	0	0	0	0	0	0	0	0	0	0	0	0	0	0	0	378	0	0	0	0	0	0	0
OTU_441	Unassigned	Unassigned	Unassigned	Unassigned	Unassigned	Unassigned	Unassigned	389	394	0.000127579	394	0	0	0	0	0	0	0	0	0	0	0	0	0	0	0	0	0	0	0	0	0	0	0	0	0	0	0	0	0	0	0	0	0	0	0	0	0	0
OTU_769	Unassigned	Unassigned	Unassigned	Unassigned	Unassigned	Unassigned	Unassigned	350	387	0.000125312	0	0	26	0	19	0	0	0	0	0	0	0	0	0	0	0	2	41	0	0	0	0	0	14	3	0	0	0	0	0	0	0	0	5	0	0	43	27	0
OTU_753	Unassigned	Unassigned	Unassigned	Unassigned	Unassigned	Unassigned	Unassigned	359	385	0.000124665	0	0	0	0	0	0	2	0	0	0	0	0	0	0	0	0	0	0	0	0	85	0	0	0	0	0	0	0	0	0	0	4	3	0	4	8	0	5	12
OTU_772	Unassigned	Unassigned	Unassigned	Unassigned	Unassigned	Unassigned	Unassigned	336	377	0.000122074	0	0	0	3	0	0	2	0	0	0	0	0	0	10	0	0	16	10	0	0	17	8	0	1	0	2	12	2	0	0	0	0	0	0	2	5	56	38	0
OTU_739	Unassigned	Unassigned	Unassigned	Unassigned	Unassigned	Unassigned	Unassigned	356	374	0.000121103	0	0	1	0	47	0	0	0	0	0	0	0	0	0	0	0	0	11	0	0	0	0	0	54	10	0	0	7	11	0	0	0	0	0	0	0	3	4	0
OTU_477	Unassigned	Unassigned	Unassigned	Unassigned	Unassigned	Unassigned	Unassigned	337	372	0.000120455	2	0	13	0	8	0	0	0	0	0	0	0	0	0	0	0	6	0	0	97	0	0	0	12	0	2	23	0	0	0	4	0	0	0	4	6	7	2	23
OTU_461	Unassigned	Unassigned	Unassigned	Unassigned	Unassigned	Unassigned	Unassigned	330	368	0.00011916	0	0	3	1	9	0	0	0	0	0	0	0	0	0	0	0	13	11	0	0	0	0	0	0	0	0	0	0	0	0	0	0	0	0	0	0	29	283	0
OTU_902	Unassigned	Unassigned	Unassigned	Unassigned	Unassigned	Unassigned	Unassigned	352	365	0.000118188	0	0	0	0	0	0	0	0	0	0	0	0	0	0	0	0	0	0	0	0	0	0	0	0	0	0	0	0	0	0	0	0	0	0	0	0	0	0	0
OTU_1130	Unassigned	Unassigned	Unassigned	Unassigned	Unassigned	Unassigned	Unassigned	426	364	0.000117865	0	0	8	2	22	0	0	0	0	0	0	0	0	0	0	0	0	0	0	3	0	0	42	43	8	2	53	0	2	0	0	4	0	0	0	0	0	19	0
OTU_571	Unassigned	Unassigned	Unassigned	Unassigned	Unassigned	Unassigned	Unassigned	370	363	0.000117541	1	0	0	7	0	0	1	8	0	2	9	0	0	3	16	0	0	0	0	0	8	0	0	0	0	0	0	0	0	0	3	210	0	0	0	0	0	0	8
OTU_815	Unassigned	Unassigned	Unassigned	Unassigned	Unassigned	Unassigned	Unassigned	409	354	0.000114627	2	0	0	0	0	21	2	106	0	0	0	0	7	15	10	0	0	0	0	2	0	2	0	0	0	0	0	0	0	0	5	2	0	0	0	0	0	0	7
OTU_475	Unassigned	Unassigned	Unassigned	Unassigned	Unassigned	Unassigned	Unassigned	337	350	0.000113331	0	0	3	0	0	0	0	0	0	0	0	0	0	285	0	0	1	0	0	0	13	0	5	0	0	0	0	0	0	0	0	25	0	6	9	0	0	0	0
OTU_669	Unassigned	Unassigned	Unassigned	Unassigned	Unassigned	Unassigned	Unassigned	339	344	0.000111389	26	0	5	14	12	1	0	0	0	0	0	0	0	3	0	0	0	0	0	17	0	13	0	8	0	0	2	4	0	0	0	0	0	0	4	22	0	0	0
OTU_468	Unassigned	Unassigned	Unassigned	Unassigned	Unassigned	Unassigned	Unassigned	285	336	0.000108798	0	0	0	0	0	6	12	97	0	0	0	0	0	0	0	0	0	0	0	0	0	0	0	0	0	4	0	0	0	0	0	6	0	0	3	32	3	0	0
OTU_595	Unassigned	Unassigned	Unassigned	Unassigned	Unassigned	Unassigned	Unassigned	336	332	0.000107503	0	0	0	0	0	0	0	0	0	0	0	0	0	0	0	0	0	0	0	0	0	0	0	0	0	0	0	0	0	0	0	0	0	0	0	0	0	2	0
OTU_617	Unassigned	Unassigned	Unassigned	Unassigned	Unassigned	Unassigned	Unassigned	333	326	0.00010556	0	0	1	3	88	0	0	0	0	0	0	0	0	0	0	0	9	28	0	0	0	0	0	62	10	0	3	1	6	0	0	0	0	0	0	0	8	0	0
OTU_420	Unassigned	Unassigned	Unassigned	Unassigned	Unassigned	Unassigned	Unassigned	357	322	0.000104265	0	0	0	0	0	0	0	0	0	0	0	0	0	0	0	0	3	0	0	0	0	0	0	0	0	0	0	0	0	0	0	0	0	0	0	0	6	0	0
OTU_2011	Unassigned	Unassigned	Unassigned	Unassigned	Unassigned	Unassigned	Unassigned	370	317	0.000102646	1	0	0	10	2	2	4	10	1	0	2	0	16	0	17	0	4	0	0	0	6	1	0	0	3	1	3	0	0	0	4	34	3	4	0	5	15	0	4
OTU_553	Unassigned	Unassigned	Unassigned	Unassigned	Unassigned	Unassigned	Unassigned	339	315	0.000101998	40	0	9	0	0	0	0	0	0	0	0	0	0	0	0	0	0	2	0	43	0	0	8	7	0	0	0	0	0	0	2	5	0	2	6	53	3	8	0
OTU_1823	Unassigned	Unassigned	Unassigned	Unassigned	Unassigned	Unassigned	Unassigned	463	304	9.84364e-05	0	0	17	0	0	0	0	0	0	0	0	0	0	127	0	0	0	0	0	0	0	0	0	0	1	0	0	0	0	0	0	0	0	0	0	0	0	0	0
OTU_1043	Unassigned	Unassigned	Unassigned	Unassigned	Unassigned	Unassigned	Unassigned	356	301	9.7465e-05	0	2	61	0	2	0	0	0	0	0	0	0	0	0	0	0	0	0	0	0	2	0	7	18	3	0	6	2	0	0	0	10	0	1	1	0	0	3	0
OTU_703	Unassigned	Unassigned	Unassigned	Unassigned	Unassigned	Unassigned	Unassigned	341	293	9.48746e-05	0	0	0	1	31	0	0	0	0	0	0	0	0	0	0	0	10	17	0	0	0	0	0	22	5	0	0	0	9	0	0	0	0	0	0	0	0	0	0
OTU_903	Unassigned	Unassigned	Unassigned	Unassigned	Unassigned	Unassigned	Unassigned	342	289	9.35794e-05	0	0	59	0	21	0	0	0	0	0	0	0	0	0	0	0	0	0	0	0	0	0	1	27	1	3	0	0	0	0	0	0	0	0	0	0	3	5	0
OTU_4165	Unassigned	Unassigned	Unassigned	Unassigned	Unassigned	Unassigned	Unassigned	349	288	9.32556e-05	0	0	1	0	0	0	0	0	0	0	0	0	0	0	0	0	4	0	0	0	0	0	0	0	0	0	0	0	0	0	0	26	0	38	18	0	5	5	9
OTU_2265	Unassigned	Unassigned	Unassigned	Unassigned	Unassigned	Unassigned	Unassigned	376	275	8.90461e-05	5	0	0	0	0	9	3	19	0	0	4	0	0	2	9	0	1	0	0	4	5	0	0	0	0	0	0	0	0	0	0	19	0	0	1	30	0	0	5
OTU_2241	Unassigned	Unassigned	Unassigned	Unassigned	Unassigned	Unassigned	Unassigned	379	272	8.80747e-05	4	0	0	0	0	1	2	13	0	0	11	0	0	13	3	0	0	0	0	6	9	0	0	0	0	0	3	0	0	0	0	22	0	0	0	22	0	0	0
OTU_1249	Unassigned	Unassigned	Unassigned	Unassigned	Unassigned	Unassigned	Unassigned	350	270	8.74271e-05	0	0	9	0	17	0	0	0	0	0	0	0	0	0	0	0	4	4	0	3	3	0	6	26	6	0	2	0	0	0	0	6	0	4	0	0	4	8	0
OTU_605	Unassigned	Unassigned	Unassigned	Unassigned	Unassigned	Unassigned	Unassigned	335	269	8.71033e-05	0	0	0	0	0	0	0	0	0	0	0	0	0	0	0	0	0	0	0	233	4	0	0	0	0	0	0	0	0	0	0	0	0	0	0	0	0	0	0
OTU_615	Unassigned	Unassigned	Unassigned	Unassigned	Unassigned	Unassigned	Unassigned	322	269	8.71033e-05	11	0	0	0	0	0	0	0	0	0	11	0	0	0	0	0	0	0	0	0	172	0	1	0	0	0	0	0	0	0	2	8	0	15	0	0	4	2	2
OTU_530	Unassigned	Unassigned	Unassigned	Unassigned	Unassigned	Unassigned	Unassigned	351	268	8.67795e-05	0	0	0	0	0	0	0	0	0	0	0	0	0	0	0	0	0	0	0	0	0	0	0	0	0	0	0	0	0	0	0	0	0	0	0	0	0	0	0
OTU_1104	Unassigned	Unassigned	Unassigned	Unassigned	Unassigned	Unassigned	Unassigned	354	266	8.61319e-05	0	2	0	0	7	0	0	0	0	0	0	0	0	0	0	0	1	0	0	4	0	0	0	4	0	8	31	0	0	0	6	32	0	0	0	0	0	9	0
OTU_1711	Unassigned	Unassigned	Unassigned	Unassigned	Unassigned	Unassigned	Unassigned	339	262	8.48366e-05	0	0	1	0	0	0	0	0	0	0	0	0	0	0	0	0	0	0	0	0	6	0	12	0	0	0	0	0	0	0	0	2	0	6	70	2	0	0	0
OTU_643	Unassigned	Unassigned	Unassigned	Unassigned	Unassigned	Unassigned	Unassigned	404	256	8.28938e-05	0	0	0	0	0	0	0	0	0	0	0	0	0	0	0	0	0	0	0	0	0	0	0	0	0	0	0	0	0	0	0	0	0	0	0	256	0	0	0
OTU_1516	Unassigned	Unassigned	Unassigned	Unassigned	Unassigned	Unassigned	Unassigned	425	247	7.99796e-05	0	0	15	0	26	0	0	0	0	0	0	0	0	0	0	0	1	3	0	0	0	0	2	20	10	0	5	3	2	0	0	19	0	10	0	0	0	18	0
OTU_629	Unassigned	Unassigned	Unassigned	Unassigned	Unassigned	Unassigned	Unassigned	342	240	7.7713e-05	0	0	18	0	0	0	0	0	0	0	0	0	0	0	0	0	11	0	0	0	0	0	0	0	0	5	38	0	0	0	0	8	0	16	0	0	1	7	0
OTU_1088	Unassigned	Unassigned	Unassigned	Unassigned	Unassigned	Unassigned	Unassigned	331	239	7.73892e-05	0	0	0	0	0	0	10	0	0	0	0	0	0	7	1	0	0	0	0	2	13	0	12	0	0	4	6	0	0	0	0	5	0	4	0	0	0	1	25
OTU_619	Unassigned	Unassigned	Unassigned	Unassigned	Unassigned	Unassigned	Unassigned	357	239	7.73892e-05	0	0	0	0	0	0	0	44	0	0	0	0	0	0	0	0	0	0	0	0	69	3	0	2	0	0	4	0	1	0	3	0	0	0	6	18	0	0	0
OTU_1945	Unassigned	Unassigned	Unassigned	Unassigned	Unassigned	Unassigned	Unassigned	332	238	7.70654e-05	2	0	9	8	5	0	6	0	2	0	0	0	0	1	0	0	3	2	0	2	0	0	4	8	3	0	14	0	0	0	0	4	0	0	2	0	3	11	60
OTU_1079	Unassigned	Unassigned	Unassigned	Unassigned	Unassigned	Unassigned	Unassigned	422	233	7.54463e-05	15	0	0	0	0	0	0	0	0	0	0	0	0	0	0	0	0	0	0	0	2	0	7	0	0	0	0	0	0	0	0	2	0	188	3	5	0	0	0
OTU_974	Unassigned	Unassigned	Unassigned	Unassigned	Unassigned	Unassigned	Unassigned	355	233	7.54463e-05	0	0	0	0	0	1	0	0	0	0	4	0	0	0	0	0	0	0	0	0	0	0	0	5	0	0	0	0	0	0	0	0	0	0	174	0	0	0	0
OTU_4071	Unassigned	Unassigned	Unassigned	Unassigned	Unassigned	Unassigned	Unassigned	340	225	7.28559e-05	0	0	13	2	6	0	0	0	0	0	0	0	0	0	0	0	0	0	0	0	0	0	0	16	7	0	0	0	13	0	0	0	0	3	0	0	117	18	0
OTU_732	Unassigned	Unassigned	Unassigned	Unassigned	Unassigned	Unassigned	Unassigned	338	225	7.28559e-05	0	0	0	0	0	0	0	0	0	0	0	0	0	0	0	0	0	0	0	0	0	0	0	0	0	0	0	0	0	0	0	0	0	0	0	0	0	0	0
OTU_585	Unassigned	Unassigned	Unassigned	Unassigned	Unassigned	Unassigned	Unassigned	332	224	7.25321e-05	0	0	0	11	45	0	0	0	0	0	0	0	0	0	0	0	0	0	0	0	0	0	0	80	7	0	0	15	18	0	0	0	0	12	0	0	0	0	0
OTU_1452	Unassigned	Unassigned	Unassigned	Unassigned	Unassigned	Unassigned	Unassigned	404	222	7.18845e-05	0	0	0	0	2	0	2	0	0	0	0	0	0	0	0	0	0	0	0	3	0	0	0	0	0	0	0	0	0	0	0	25	0	25	3	29	9	13	26
OTU_1095	Unassigned	Unassigned	Unassigned	Unassigned	Unassigned	Unassigned	Unassigned	332	220	7.12369e-05	0	0	36	0	20	0	0	0	0	0	0	0	0	0	0	0	6	0	0	0	0	0	0	0	0	0	2	0	1	0	0	0	0	0	0	0	15	10	0
OTU_682	Unassigned	Unassigned	Unassigned	Unassigned	Unassigned	Unassigned	Unassigned	348	220	7.12369e-05	0	0	0	5	0	0	0	0	0	0	0	0	0	0	0	0	9	5	0	0	0	0	1	0	0	0	2	0	0	0	0	1	4	0	7	0	2	9	0
OTU_794	Unassigned	Unassigned	Unassigned	Unassigned	Unassigned	Unassigned	Unassigned	330	220	7.12369e-05	0	0	2	0	0	0	0	0	0	0	0	0	0	0	0	0	1	0	0	0	0	0	0	3	0	0	0	0	0	0	0	0	0	0	0	0	59	54	0
OTU_622	Unassigned	Unassigned	Unassigned	Unassigned	Unassigned	Unassigned	Unassigned	340	219	7.09131e-05	0	0	13	0	32	0	0	0	0	0	0	0	0	0	0	0	15	0	0	0	0	0	0	25	4	0	0	7	5	0	0	64	0	0	0	0	0	0	0
OTU_819	Unassigned	Unassigned	Unassigned	Unassigned	Unassigned	Unassigned	Unassigned	291	218	7.05893e-05	0	0	0	0	0	0	0	0	0	0	0	0	0	0	0	0	0	0	0	0	0	0	0	0	0	5	0	0	0	0	0	0	0	0	0	0	23	0	46
OTU_695	Unassigned	Unassigned	Unassigned	Unassigned	Unassigned	Unassigned	Unassigned	330	217	7.02655e-05	0	0	48	0	51	0	0	0	0	0	0	0	0	0	0	0	0	0	0	8	0	0	2	0	0	0	0	0	8	0	0	0	0	0	6	0	17	0	0
OTU_899	Unassigned	Unassigned	Unassigned	Unassigned	Unassigned	Unassigned	Unassigned	358	213	6.89703e-05	0	0	17	0	16	1	0	0	0	0	0	0	0	0	0	0	50	12	0	0	0	0	0	18	1	0	0	0	9	0	0	0	0	0	0	0	0	4	0
OTU_735	Unassigned	Unassigned	Unassigned	Unassigned	Unassigned	Unassigned	Unassigned	335	210	6.79988e-05	0	0	0	52	0	0	0	0	0	0	0	0	0	0	0	0	10	0	0	0	0	0	0	0	0	0	0	0	0	0	0	0	0	0	0	0	54	0	0
OTU_777	Unassigned	Unassigned	Unassigned	Unassigned	Unassigned	Unassigned	Unassigned	399	210	6.79988e-05	0	0	1	0	0	0	0	0	0	0	0	0	0	0	0	0	0	0	0	0	0	0	0	0	0	0	0	0	0	0	0	0	0	0	0	0	0	0	0
OTU_895	Unassigned	Unassigned	Unassigned	Unassigned	Unassigned	Unassigned	Unassigned	356	203	6.57322e-05	0	0	0	0	14	0	0	0	0	0	0	0	0	0	0	0	3	52	0	0	0	0	0	23	3	0	0	0	3	0	0	0	0	0	0	0	1	0	0
OTU_1067	Unassigned	Unassigned	Unassigned	Unassigned	Unassigned	Unassigned	Unassigned	371	202	6.54084e-05	0	0	0	0	0	0	0	0	0	1	0	0	0	0	0	0	5	6	0	0	0	0	0	43	5	0	0	0	0	0	0	0	0	0	0	0	4	3	0
OTU_740	Unassigned	Unassigned	Unassigned	Unassigned	Unassigned	Unassigned	Unassigned	334	202	6.54084e-05	0	0	1	0	11	0	0	0	0	0	0	0	0	0	0	0	11	18	0	0	0	0	0	102	1	0	0	0	13	0	0	0	0	0	0	0	4	0	0
OTU_608	Unassigned	Unassigned	Unassigned	Unassigned	Unassigned	Unassigned	Unassigned	342	195	6.31418e-05	0	0	0	0	2	0	0	0	0	0	0	0	0	3	0	0	0	0	0	0	0	0	0	0	0	0	0	0	0	0	0	181	0	0	0	0	0	2	0
OTU_959	Unassigned	Unassigned	Unassigned	Unassigned	Unassigned	Unassigned	Unassigned	345	195	6.31418e-05	0	5	0	0	0	0	0	0	0	0	0	0	0	0	0	0	0	3	0	0	0	0	17	0	0	0	2	0	0	0	0	3	0	0	4	0	3	0	0
OTU_5321	Unassigned	Unassigned	Unassigned	Unassigned	Unassigned	Unassigned	Unassigned	331	193	6.24942e-05	1	0	1	0	0	0	1	0	0	0	0	0	0	7	0	0	1	0	0	0	0	0	20	0	0	5	1	0	0	0	0	5	0	8	5	0	0	9	4
OTU_938	Unassigned	Unassigned	Unassigned	Unassigned	Unassigned	Unassigned	Unassigned	355	192	6.21704e-05	0	0	0	0	0	0	0	0	0	0	0	0	0	0	0	0	0	0	0	0	0	0	0	0	0	0	0	0	0	0	0	0	0	0	192	0	0	0	0
OTU_2401	Unassigned	Unassigned	Unassigned	Unassigned	Unassigned	Unassigned	Unassigned	335	191	6.18466e-05	0	0	0	0	0	0	0	0	0	0	0	0	0	0	0	0	8	48	0	0	0	0	0	15	3	0	0	0	0	0	0	0	0	1	0	1	41	16	0
OTU_611	Unassigned	Unassigned	Unassigned	Unassigned	Unassigned	Unassigned	Unassigned	342	189	6.1199e-05	0	0	0	0	0	5	88	5	0	0	0	0	0	0	0	0	0	0	0	0	0	0	0	0	0	0	4	0	0	0	0	0	0	0	4	0	0	0	0
OTU_1007	Unassigned	Unassigned	Unassigned	Unassigned	Unassigned	Unassigned	Unassigned	351	188	6.08752e-05	27	0	5	0	4	0	0	0	0	0	0	0	0	4	0	1	0	0	0	5	13	0	4	0	0	0	7	0	0	0	0	12	0	0	16	0	0	2	4
OTU_1154	Unassigned	Unassigned	Unassigned	Unassigned	Unassigned	Unassigned	Unassigned	338	187	6.05513e-05	0	0	69	5	17	0	0	0	0	0	0	0	0	0	0	0	9	2	0	0	0	0	4	0	1	0	9	0	0	0	0	4	0	1	0	0	16	0	0
OTU_1536	Unassigned	Unassigned	Unassigned	Unassigned	Unassigned	Unassigned	Unassigned	335	187	6.05513e-05	0	0	0	0	11	0	0	0	0	0	0	0	0	0	0	0	2	2	0	0	0	0	0	13	2	0	0	24	76	0	0	0	0	0	0	0	0	0	0
OTU_718	Unassigned	Unassigned	Unassigned	Unassigned	Unassigned	Unassigned	Unassigned	339	187	6.05513e-05	0	0	0	10	22	0	0	0	0	0	0	0	0	0	0	0	75	4	0	0	0	0	0	25	5	0	0	0	8	0	0	0	0	0	0	0	0	8	0
OTU_2109	Unassigned	Unassigned	Unassigned	Unassigned	Unassigned	Unassigned	Unassigned	325	186	6.02275e-05	0	0	0	0	0	0	0	1	0	0	0	0	0	0	0	0	0	0	0	0	0	0	0	0	0	0	0	1	0	0	0	0	0	0	0	0	6	0	0
OTU_967	Unassigned	Unassigned	Unassigned	Unassigned	Unassigned	Unassigned	Unassigned	338	185	5.99037e-05	0	0	0	0	0	0	0	0	0	0	0	0	0	0	0	0	0	0	0	110	3	0	0	0	0	10	10	0	0	0	0	2	0	0	2	0	2	0	0
OTU_705	Unassigned	Unassigned	Unassigned	Unassigned	Unassigned	Unassigned	Unassigned	338	184	5.95799e-05	0	0	43	0	49	0	0	0	0	0	0	0	0	0	0	0	16	11	0	0	0	0	0	16	2	0	0	1	8	0	0	0	0	1	0	0	2	10	0
OTU_991	Unassigned	Unassigned	Unassigned	Unassigned	Unassigned	Unassigned	Unassigned	342	184	5.95799e-05	0	0	5	0	0	0	0	0	0	0	0	0	0	0	0	0	3	8	0	0	0	0	0	12	0	0	0	0	0	0	0	0	0	0	0	0	45	40	0
OTU_872	Unassigned	Unassigned	Unassigned	Unassigned	Unassigned	Unassigned	Unassigned	345	182	5.89323e-05	0	0	25	0	89	0	0	0	6	0	0	0	0	0	0	0	0	0	0	0	0	0	6	2	0	0	0	0	8	0	0	0	0	0	0	0	4	6	0
OTU_1099	Unassigned	Unassigned	Unassigned	Unassigned	Unassigned	Unassigned	Unassigned	358	179	5.79609e-05	0	0	0	0	3	0	0	0	0	0	0	0	0	0	0	0	4	0	0	0	42	0	4	0	0	0	0	0	0	0	0	13	0	0	3	14	9	0	0
OTU_3112	Unassigned	Unassigned	Unassigned	Unassigned	Unassigned	Unassigned	Unassigned	335	179	5.79609e-05	92	0	0	0	3	0	0	0	0	0	0	0	0	0	0	0	0	0	0	0	0	0	2	11	0	0	0	0	0	0	0	0	0	0	0	0	0	1	0
OTU_1843	Unassigned	Unassigned	Unassigned	Unassigned	Unassigned	Unassigned	Unassigned	356	177	5.73133e-05	0	0	0	0	0	0	0	0	0	0	0	0	0	0	0	0	0	0	0	0	0	0	0	0	0	0	0	0	0	0	0	0	0	0	177	0	0	0	0
OTU_1058	Unassigned	Unassigned	Unassigned	Unassigned	Unassigned	Unassigned	Unassigned	391	174	5.63419e-05	0	0	0	0	0	0	0	0	0	0	0	0	1	0	0	0	2	0	1	0	0	0	0	0	0	0	0	0	0	0	0	0	1	0	0	0	0	0	0
OTU_881	Unassigned	Unassigned	Unassigned	Unassigned	Unassigned	Unassigned	Unassigned	332	174	5.63419e-05	0	0	9	7	8	0	0	0	0	0	0	0	0	0	0	0	0	0	0	0	0	0	10	11	2	0	3	0	0	0	0	1	0	0	0	0	0	5	0
OTU_635	Unassigned	Unassigned	Unassigned	Unassigned	Unassigned	Unassigned	Unassigned	322	173	5.60181e-05	0	0	0	2	0	0	0	0	0	0	0	0	0	0	0	0	0	0	0	0	0	0	0	0	0	0	19	0	0	0	0	0	0	0	0	0	0	0	0
OTU_734	Unassigned	Unassigned	Unassigned	Unassigned	Unassigned	Unassigned	Unassigned	371	173	5.60181e-05	0	0	0	0	0	0	0	0	0	0	0	0	0	0	0	0	0	0	0	0	0	0	0	0	3	0	0	0	0	0	0	0	1	16	0	0	0	0	0
OTU_712	Unassigned	Unassigned	Unassigned	Unassigned	Unassigned	Unassigned	Unassigned	353	171	5.53705e-05	0	0	4	0	0	0	0	0	0	0	0	0	0	0	0	0	0	0	0	0	0	0	1	0	0	1	32	0	0	0	0	2	0	0	0	0	0	0	0
OTU_776	Unassigned	Unassigned	Unassigned	Unassigned	Unassigned	Unassigned	Unassigned	344	170	5.50467e-05	0	0	0	0	0	0	0	0	0	0	0	0	0	0	0	0	0	0	0	0	0	0	0	0	0	0	0	0	0	0	0	0	0	0	0	0	0	0	0
OTU_3010	Unassigned	Unassigned	Unassigned	Unassigned	Unassigned	Unassigned	Unassigned	466	166	5.37515e-05	0	0	4	0	18	0	0	0	0	0	0	0	0	0	0	0	0	0	0	2	0	0	9	5	0	0	30	0	2	0	0	8	0	0	0	1	1	4	0
OTU_926	Unassigned	Unassigned	Unassigned	Unassigned	Unassigned	Unassigned	Unassigned	351	164	5.31039e-05	0	0	0	0	0	0	0	0	0	0	0	0	0	0	0	0	0	0	0	26	0	0	0	0	0	0	11	0	0	0	0	0	0	0	0	0	0	5	68
OTU_2284	Unassigned	Unassigned	Unassigned	Unassigned	Unassigned	Unassigned	Unassigned	458	163	5.27801e-05	0	0	11	0	3	0	0	0	0	0	0	0	0	0	0	0	6	4	0	0	0	0	2	0	7	0	15	0	0	0	0	7	0	3	0	0	11	16	0
OTU_774	Unassigned	Unassigned	Unassigned	Unassigned	Unassigned	Unassigned	Unassigned	342	162	5.24562e-05	0	0	0	0	0	0	0	0	0	0	0	0	0	0	0	0	0	0	0	0	0	0	0	0	0	0	0	0	6	0	0	0	0	0	0	0	0	0	0
OTU_963	Unassigned	Unassigned	Unassigned	Unassigned	Unassigned	Unassigned	Unassigned	344	162	5.24562e-05	8	0	3	0	0	0	0	2	0	0	0	0	0	12	0	0	0	0	0	5	1	0	0	1	0	0	0	0	0	0	3	0	0	0	1	8	5	0	0
OTU_1044	Unassigned	Unassigned	Unassigned	Unassigned	Unassigned	Unassigned	Unassigned	334	160	5.18086e-05	0	0	8	0	3	0	0	0	0	0	0	0	0	0	0	0	4	0	0	0	0	0	5	19	0	6	5	0	1	0	0	8	0	0	0	0	1	9	0
OTU_934	Unassigned	Unassigned	Unassigned	Unassigned	Unassigned	Unassigned	Unassigned	342	159	5.14848e-05	0	0	15	0	0	0	0	0	0	0	0	0	0	0	0	0	0	0	0	0	1	0	0	0	0	0	0	0	0	0	0	56	0	12	7	0	0	0	0
OTU_6853	Unassigned	Unassigned	Unassigned	Unassigned	Unassigned	Unassigned	Unassigned	349	157	5.08372e-05	0	0	0	11	0	0	0	17	0	0	4	0	18	0	0	0	0	0	1	1	0	0	0	0	0	0	2	0	0	0	1	0	0	0	0	0	1	0	0
OTU_722	Unassigned	Unassigned	Unassigned	Unassigned	Unassigned	Unassigned	Unassigned	340	157	5.08372e-05	0	0	0	0	0	12	41	0	0	0	0	0	0	1	0	0	0	0	0	0	3	0	0	0	0	0	3	0	0	0	0	0	0	0	8	49	0	0	0
OTU_1299	Unassigned	Unassigned	Unassigned	Unassigned	Unassigned	Unassigned	Unassigned	332	156	5.05134e-05	0	0	0	1	3	0	0	0	0	0	0	0	0	0	0	0	26	0	0	0	0	0	0	6	0	0	0	3	0	0	0	0	0	0	0	0	27	7	0
OTU_1151	Unassigned	Unassigned	Unassigned	Unassigned	Unassigned	Unassigned	Unassigned	346	155	5.01896e-05	10	0	0	0	0	0	0	0	0	0	0	0	0	2	0	0	0	6	0	10	7	0	0	16	0	1	6	0	0	0	5	2	0	0	1	0	0	1	1
OTU_809	Unassigned	Unassigned	Unassigned	Unassigned	Unassigned	Unassigned	Unassigned	342	154	4.98658e-05	0	0	20	15	7	0	0	0	0	0	0	0	0	0	0	0	0	0	0	0	0	0	0	12	3	6	14	0	0	0	0	1	0	9	0	0	7	2	0
OTU_698	Unassigned	Unassigned	Unassigned	Unassigned	Unassigned	Unassigned	Unassigned	345	153	4.9542e-05	0	0	0	0	0	0	0	0	0	0	0	0	0	0	0	0	0	0	0	0	0	0	0	0	0	0	0	0	0	0	0	0	0	143	0	0	0	0	0
OTU_1921	Unassigned	Unassigned	Unassigned	Unassigned	Unassigned	Unassigned	Unassigned	366	152	4.92182e-05	0	0	0	2	0	0	1	4	0	0	0	0	0	0	7	2	0	0	0	0	0	0	0	0	1	2	0	0	0	2	0	90	0	3	0	0	0	0	0
OTU_8856	Unassigned	Unassigned	Unassigned	Unassigned	Unassigned	Unassigned	Unassigned	347	152	4.92182e-05	0	0	0	0	0	0	0	0	0	0	0	0	0	0	0	0	6	10	0	0	0	0	0	11	0	0	0	0	0	0	0	0	0	0	0	0	7	6	0
OTU_1245	Unassigned	Unassigned	Unassigned	Unassigned	Unassigned	Unassigned	Unassigned	340	149	4.82468e-05	0	0	3	4	0	0	0	0	0	0	0	0	0	0	0	0	21	0	0	0	0	0	0	45	4	0	3	3	4	0	0	0	0	4	2	0	2	1	0
OTU_648	Unassigned	Unassigned	Unassigned	Unassigned	Unassigned	Unassigned	Unassigned	350	148	4.7923e-05	0	0	0	0	0	0	0	0	0	0	0	0	0	0	0	0	0	0	0	0	0	1	0	0	0	0	0	0	0	0	0	0	0	0	0	59	0	0	0
OTU_919	Unassigned	Unassigned	Unassigned	Unassigned	Unassigned	Unassigned	Unassigned	334	147	4.75992e-05	0	0	0	0	0	0	0	0	0	0	133	0	0	0	0	0	0	0	0	0	0	0	0	0	0	0	0	0	0	0	0	0	0	0	0	0	0	0	0
OTU_1332	Unassigned	Unassigned	Unassigned	Unassigned	Unassigned	Unassigned	Unassigned	348	146	4.72754e-05	0	0	0	0	0	0	0	0	0	0	0	0	0	0	0	0	0	0	0	0	0	0	0	0	0	0	0	0	0	0	0	0	0	0	146	0	0	0	0
OTU_1605	Unassigned	Unassigned	Unassigned	Unassigned	Unassigned	Unassigned	Unassigned	324	146	4.72754e-05	0	0	0	10	2	0	0	0	0	0	0	0	0	0	0	0	0	0	0	4	0	0	0	20	0	0	0	0	0	0	28	0	0	0	11	0	0	0	0
OTU_2744	Unassigned	Unassigned	Unassigned	Unassigned	Unassigned	Unassigned	Unassigned	335	146	4.72754e-05	0	0	6	0	0	0	0	0	0	0	0	0	0	0	0	0	0	15	0	0	0	0	0	2	0	0	2	0	0	0	0	0	0	9	0	0	6	15	0
OTU_717	Unassigned	Unassigned	Unassigned	Unassigned	Unassigned	Unassigned	Unassigned	332	146	4.72754e-05	0	0	0	0	0	0	0	0	0	0	0	0	0	0	0	0	0	0	0	0	0	0	0	0	0	0	0	0	0	0	0	0	0	0	0	0	0	0	0
OTU_4702	Unassigned	Unassigned	Unassigned	Unassigned	Unassigned	Unassigned	Unassigned	287	145	4.69516e-05	0	0	0	0	0	0	2	0	0	0	0	0	0	0	0	0	1	0	0	0	0	0	0	0	0	0	0	0	0	0	0	0	0	0	0	0	7	0	12
OTU_1147	Unassigned	Unassigned	Unassigned	Unassigned	Unassigned	Unassigned	Unassigned	333	144	4.66278e-05	0	0	0	0	0	0	17	0	0	0	0	0	0	8	0	0	0	0	0	6	5	0	14	0	0	1	2	0	0	0	0	0	0	0	5	0	0	3	0
OTU_736	Unassigned	Unassigned	Unassigned	Unassigned	Unassigned	Unassigned	Unassigned	349	144	4.66278e-05	0	0	0	0	0	0	0	0	0	0	0	0	0	0	0	0	0	140	0	0	0	0	0	0	0	0	0	0	0	0	0	0	0	0	0	0	0	0	0
OTU_2643	Unassigned	Unassigned	Unassigned	Unassigned	Unassigned	Unassigned	Unassigned	433	143	4.6304e-05	0	0	26	0	20	0	0	0	0	0	0	0	0	0	0	0	5	3	0	0	0	0	0	10	6	0	0	0	0	0	0	0	0	0	0	0	25	7	0
OTU_4179	Unassigned	Unassigned	Unassigned	Unassigned	Unassigned	Unassigned	Unassigned	333	143	4.6304e-05	5	0	2	1	6	0	3	0	0	0	0	0	0	28	0	7	0	0	0	1	3	0	8	0	2	3	0	0	0	0	0	0	0	0	0	0	0	3	12
OTU_911	Unassigned	Unassigned	Unassigned	Unassigned	Unassigned	Unassigned	Unassigned	342	142	4.59802e-05	0	0	0	0	1	0	0	0	0	0	0	0	0	94	0	0	1	0	0	0	14	0	0	9	0	0	0	0	0	0	0	1	0	0	0	0	0	0	0
OTU_1561	Unassigned	Unassigned	Unassigned	Unassigned	Unassigned	Unassigned	Unassigned	377	140	4.53326e-05	0	0	0	5	39	0	0	0	0	0	0	0	0	0	0	0	0	11	0	0	0	0	0	23	3	0	0	6	10	0	0	0	0	0	0	0	1	0	0
OTU_1663	Unassigned	Unassigned	Unassigned	Unassigned	Unassigned	Unassigned	Unassigned	331	140	4.53326e-05	0	0	0	0	0	0	9	0	0	0	0	0	0	0	3	0	0	0	0	4	3	0	0	0	0	0	3	0	0	0	0	10	0	1	8	6	1	2	23
OTU_2022	Unassigned	Unassigned	Unassigned	Unassigned	Unassigned	Unassigned	Unassigned	333	139	4.50088e-05	0	0	4	7	1	0	0	0	0	0	0	0	0	0	0	0	0	4	0	0	0	0	2	9	0	0	15	0	0	0	0	0	0	0	0	0	0	18	0
OTU_5806	Unassigned	Unassigned	Unassigned	Unassigned	Unassigned	Unassigned	Unassigned	344	139	4.50088e-05	0	0	3	0	4	0	0	0	0	0	0	0	0	0	0	0	0	2	0	0	0	0	1	0	2	0	0	0	0	0	0	2	0	1	1	0	6	6	0
OTU_1123	Unassigned	Unassigned	Unassigned	Unassigned	Unassigned	Unassigned	Unassigned	370	138	4.4685e-05	0	0	0	1	0	0	0	8	0	0	0	0	3	3	0	0	0	0	0	0	0	0	0	0	0	0	0	0	0	0	0	73	2	1	0	0	0	0	3
OTU_1365	Unassigned	Unassigned	Unassigned	Unassigned	Unassigned	Unassigned	Unassigned	423	138	4.4685e-05	0	0	18	0	0	0	0	0	0	0	0	0	0	0	0	0	0	1	0	0	0	0	6	0	0	8	22	0	0	0	0	0	0	5	0	0	0	12	0
OTU_939	Unassigned	Unassigned	Unassigned	Unassigned	Unassigned	Unassigned	Unassigned	324	138	4.4685e-05	0	0	3	15	8	0	1	0	0	0	0	0	0	0	0	0	8	1	0	0	0	0	0	5	2	0	0	1	0	0	0	0	0	0	0	0	1	2	0
OTU_4502	Unassigned	Unassigned	Unassigned	Unassigned	Unassigned	Unassigned	Unassigned	355	134	4.33897e-05	0	0	0	0	0	0	0	0	0	0	0	0	0	0	0	0	0	33	0	0	0	0	0	6	2	0	0	0	0	0	0	0	0	0	0	0	50	8	0
OTU_1093	Unassigned	Unassigned	Unassigned	Unassigned	Unassigned	Unassigned	Unassigned	394	132	4.27421e-05	0	0	0	0	0	0	0	0	0	0	0	0	0	0	0	0	0	0	0	0	0	0	0	0	0	0	0	0	0	0	0	0	0	0	0	7	0	0	0
OTU_1281	Unassigned	Unassigned	Unassigned	Unassigned	Unassigned	Unassigned	Unassigned	333	131	4.24183e-05	0	0	0	11	15	0	0	0	0	0	0	0	0	0	0	0	0	4	0	0	0	0	0	23	0	0	0	0	2	0	0	5	0	0	0	0	0	0	0
OTU_1698	Unassigned	Unassigned	Unassigned	Unassigned	Unassigned	Unassigned	Unassigned	335	131	4.24183e-05	0	0	0	0	0	0	0	0	0	0	0	0	0	0	0	0	1	5	0	0	0	0	0	2	1	0	0	0	0	0	0	0	0	0	0	0	38	57	0
OTU_1213	Unassigned	Unassigned	Unassigned	Unassigned	Unassigned	Unassigned	Unassigned	340	130	4.20945e-05	0	0	0	2	0	0	0	0	0	0	0	0	0	0	0	0	0	0	0	17	0	0	0	0	0	0	0	0	0	0	0	0	0	0	0	0	0	0	0
OTU_1480	Unassigned	Unassigned	Unassigned	Unassigned	Unassigned	Unassigned	Unassigned	356	130	4.20945e-05	0	0	0	0	5	0	0	0	0	0	0	0	0	0	0	0	9	12	0	0	0	0	0	32	0	0	0	0	3	0	0	0	0	0	0	0	0	0	0
OTU_1963	Unassigned	Unassigned	Unassigned	Unassigned	Unassigned	Unassigned	Unassigned	326	128	4.14469e-05	0	0	0	0	3	0	0	0	0	0	0	0	0	0	0	0	5	51	0	0	0	0	0	0	0	0	0	2	33	0	0	0	0	0	0	0	2	4	0
OTU_763	Unassigned	Unassigned	Unassigned	Unassigned	Unassigned	Unassigned	Unassigned	337	128	4.14469e-05	0	0	0	0	0	0	0	0	0	0	0	0	0	0	0	0	0	0	0	0	19	0	0	0	0	0	0	0	0	0	0	0	0	0	0	102	0	0	0
OTU_755	Unassigned	Unassigned	Unassigned	Unassigned	Unassigned	Unassigned	Unassigned	342	127	4.11231e-05	0	0	4	0	0	0	0	0	0	0	0	0	0	0	0	0	0	2	0	0	0	0	0	0	0	3	25	0	0	0	0	0	0	0	0	0	5	0	51
OTU_1277	Unassigned	Unassigned	Unassigned	Unassigned	Unassigned	Unassigned	Unassigned	345	126	4.07993e-05	0	0	0	0	99	0	0	0	0	0	0	0	0	0	0	0	0	2	0	0	0	0	0	0	0	0	0	0	13	0	0	0	0	0	0	0	2	1	0
OTU_976	Unassigned	Unassigned	Unassigned	Unassigned	Unassigned	Unassigned	Unassigned	335	125	4.04755e-05	0	0	0	0	0	0	0	113	2	0	0	0	0	0	0	0	0	0	0	0	0	0	0	0	0	0	0	0	0	0	0	0	0	0	0	0	0	0	0
OTU_1373	Unassigned	Unassigned	Unassigned	Unassigned	Unassigned	Unassigned	Unassigned	373	124	4.01517e-05	4	0	0	0	0	3	7	7	0	0	0	0	8	32	0	0	0	0	0	0	0	0	0	0	0	0	0	0	0	0	0	0	0	0	2	0	0	1	0
OTU_823	Unassigned	Unassigned	Unassigned	Unassigned	Unassigned	Unassigned	Unassigned	347	124	4.01517e-05	0	0	0	0	0	6	50	16	0	0	0	0	0	0	0	0	0	0	0	0	0	0	0	0	0	0	0	0	0	0	5	0	0	0	0	0	0	0	0
OTU_1001	Unassigned	Unassigned	Unassigned	Unassigned	Unassigned	Unassigned	Unassigned	332	123	3.98279e-05	0	0	2	0	1	0	0	0	0	0	0	0	0	0	0	0	0	0	0	0	0	0	0	1	0	0	0	0	0	0	0	0	0	0	0	0	0	0	0
OTU_1137	Unassigned	Unassigned	Unassigned	Unassigned	Unassigned	Unassigned	Unassigned	352	123	3.98279e-05	0	0	0	0	0	0	0	0	0	0	0	0	0	0	0	0	0	0	0	0	0	0	0	0	0	0	0	0	0	0	0	0	0	0	0	0	0	0	0
OTU_1461	Unassigned	Unassigned	Unassigned	Unassigned	Unassigned	Unassigned	Unassigned	348	123	3.98279e-05	0	0	0	0	61	0	0	0	0	0	0	0	0	0	0	0	0	2	0	0	0	0	0	23	0	0	3	2	5	0	0	0	0	2	0	0	0	0	0
OTU_844	Unassigned	Unassigned	Unassigned	Unassigned	Unassigned	Unassigned	Unassigned	338	122	3.95041e-05	0	0	0	0	0	0	0	0	0	0	0	0	0	4	0	0	0	0	0	14	0	0	0	0	0	0	0	0	0	0	10	0	0	0	0	0	0	0	0
OTU_1447	Unassigned	Unassigned	Unassigned	Unassigned	Unassigned	Unassigned	Unassigned	351	121	3.91803e-05	0	0	0	0	0	0	0	0	0	0	0	0	0	0	0	0	0	73	0	0	0	0	0	0	0	0	0	0	0	0	0	0	0	0	0	2	0	2	0
OTU_1510	Unassigned	Unassigned	Unassigned	Unassigned	Unassigned	Unassigned	Unassigned	337	119	3.85327e-05	0	0	0	0	0	0	0	0	0	0	0	0	0	0	0	0	0	0	0	1	0	0	0	0	0	0	0	0	0	0	0	0	0	0	0	0	0	0	0
OTU_5000	Unassigned	Unassigned	Unassigned	Unassigned	Unassigned	Unassigned	Unassigned	337	119	3.85327e-05	0	0	7	4	3	0	0	0	0	0	0	0	0	0	0	0	2	0	0	9	0	0	0	0	0	0	0	0	0	0	0	0	0	0	3	0	2	0	6
OTU_1301	Unassigned	Unassigned	Unassigned	Unassigned	Unassigned	Unassigned	Unassigned	315	117	3.78851e-05	0	0	0	0	0	0	0	0	0	0	65	2	0	0	0	0	0	0	0	0	0	0	0	0	0	0	0	0	0	0	0	0	0	0	0	0	0	0	0
OTU_1132	Unassigned	Unassigned	Unassigned	Unassigned	Unassigned	Unassigned	Unassigned	352	116	3.75613e-05	0	0	0	0	0	0	0	2	85	0	0	0	0	0	0	0	0	0	0	0	0	0	0	0	0	0	0	0	0	0	0	1	0	0	0	0	0	0	0
OTU_1500	Unassigned	Unassigned	Unassigned	Unassigned	Unassigned	Unassigned	Unassigned	331	116	3.75613e-05	0	0	0	0	0	0	2	0	0	0	0	0	0	0	0	0	0	0	0	0	3	0	2	0	0	0	0	0	0	0	0	13	0	2	5	0	0	0	18
OTU_1150	Unassigned	Unassigned	Unassigned	Unassigned	Unassigned	Unassigned	Unassigned	357	115	3.72375e-05	0	0	3	0	33	0	0	0	0	0	0	0	0	0	0	0	0	4	0	0	0	0	0	11	11	0	0	0	2	0	0	0	0	4	0	0	1	11	0
OTU_1220	Unassigned	Unassigned	Unassigned	Unassigned	Unassigned	Unassigned	Unassigned	345	115	3.72375e-05	0	0	3	0	0	0	0	0	0	0	0	0	0	0	0	0	0	10	0	0	0	0	0	2	0	0	0	0	6	0	0	0	0	0	0	0	32	17	0
OTU_1219	Unassigned	Unassigned	Unassigned	Unassigned	Unassigned	Unassigned	Unassigned	333	114	3.69137e-05	0	0	5	0	48	0	0	0	0	0	0	0	0	0	0	0	0	7	0	0	0	0	0	0	0	0	0	0	6	0	0	0	0	0	0	0	0	0	0
OTU_1116	Unassigned	Unassigned	Unassigned	Unassigned	Unassigned	Unassigned	Unassigned	341	113	3.65899e-05	0	0	0	0	7	0	0	0	0	0	0	0	0	0	0	0	2	4	0	0	0	0	0	46	0	0	0	0	4	0	0	0	0	0	0	0	0	0	0
OTU_1269	Unassigned	Unassigned	Unassigned	Unassigned	Unassigned	Unassigned	Unassigned	340	112	3.6266e-05	0	0	0	0	0	18	52	0	0	0	0	0	0	0	0	0	0	0	0	0	3	6	0	0	0	0	0	0	0	0	0	0	0	0	3	0	0	0	0
OTU_5018	Unassigned	Unassigned	Unassigned	Unassigned	Unassigned	Unassigned	Unassigned	337	112	3.6266e-05	0	0	0	0	0	0	3	0	0	0	0	0	0	0	0	0	0	2	0	4	6	0	6	0	0	0	7	0	0	0	0	13	0	0	2	0	0	0	0
OTU_5639	Unassigned	Unassigned	Unassigned	Unassigned	Unassigned	Unassigned	Unassigned	331	112	3.6266e-05	0	0	2	0	0	0	0	0	0	0	0	0	0	0	0	0	0	3	0	0	0	0	4	0	0	0	3	0	0	0	0	13	0	26	4	0	1	2	2
OTU_942	Unassigned	Unassigned	Unassigned	Unassigned	Unassigned	Unassigned	Unassigned	365	112	3.6266e-05	0	0	0	0	0	0	0	0	0	0	0	0	0	0	0	0	0	0	0	0	0	0	0	0	0	0	0	0	0	0	0	0	0	0	0	0	0	0	0
OTU_1024	Unassigned	Unassigned	Unassigned	Unassigned	Unassigned	Unassigned	Unassigned	338	111	3.59422e-05	0	0	17	0	5	0	0	0	0	0	0	0	0	0	0	0	40	14	0	0	0	0	0	0	0	0	0	0	10	0	0	0	0	0	0	0	1	21	0
OTU_8562	Unassigned	Unassigned	Unassigned	Unassigned	Unassigned	Unassigned	Unassigned	338	111	3.59422e-05	0	0	2	0	0	0	0	0	0	0	0	0	0	0	0	0	2	0	0	0	0	0	0	0	0	0	0	0	0	0	0	0	0	0	0	0	7	3	0
OTU_1218	Unassigned	Unassigned	Unassigned	Unassigned	Unassigned	Unassigned	Unassigned	334	110	3.56184e-05	0	0	0	0	0	0	0	0	0	0	0	0	0	0	0	0	0	0	0	0	0	0	1	0	0	0	0	0	0	0	0	0	0	0	103	6	0	0	0
OTU_2195	Unassigned	Unassigned	Unassigned	Unassigned	Unassigned	Unassigned	Unassigned	446	110	3.56184e-05	0	0	8	0	0	0	0	0	0	0	0	0	0	0	0	0	0	0	0	0	7	0	4	0	0	0	2	0	0	0	0	0	0	0	0	0	0	0	29
OTU_5313	Unassigned	Unassigned	Unassigned	Unassigned	Unassigned	Unassigned	Unassigned	355	110	3.56184e-05	0	0	0	0	0	0	0	0	0	0	0	0	0	0	0	0	4	0	0	0	0	0	0	0	0	0	0	0	0	0	0	0	0	0	0	7	0	0	0
OTU_898	Unassigned	Unassigned	Unassigned	Unassigned	Unassigned	Unassigned	Unassigned	330	109	3.52946e-05	0	0	0	0	0	0	5	9	0	0	0	0	0	0	0	0	0	0	0	0	7	0	0	0	0	0	0	0	0	0	0	0	0	0	0	0	0	0	0
OTU_874	Unassigned	Unassigned	Unassigned	Unassigned	Unassigned	Unassigned	Unassigned	323	105	3.39994e-05	0	0	0	93	0	0	0	0	0	0	0	0	0	0	0	0	0	0	0	0	0	0	0	0	0	0	0	3	1	0	0	0	0	0	0	0	0	0	0
OTU_1488	Unassigned	Unassigned	Unassigned	Unassigned	Unassigned	Unassigned	Unassigned	343	104	3.36756e-05	0	0	2	2	7	0	0	0	0	0	0	0	0	8	0	0	0	5	0	0	0	0	0	5	0	0	7	0	0	0	0	0	0	0	0	0	2	4	0
OTU_922	Unassigned	Unassigned	Unassigned	Unassigned	Unassigned	Unassigned	Unassigned	343	104	3.36756e-05	0	0	0	0	0	0	0	0	0	0	0	0	0	0	0	0	0	0	0	0	0	0	0	0	0	0	3	0	0	0	0	0	0	0	0	0	3	0	0
OTU_1630	Unassigned	Unassigned	Unassigned	Unassigned	Unassigned	Unassigned	Unassigned	324	103	3.33518e-05	0	0	0	0	2	0	0	0	0	0	0	0	0	0	0	0	0	0	0	0	0	0	0	17	0	0	0	0	0	0	0	0	0	0	0	0	4	0	0
OTU_1419	Unassigned	Unassigned	Unassigned	Unassigned	Unassigned	Unassigned	Unassigned	345	102	3.3028e-05	0	0	2	7	0	0	0	0	0	0	0	0	0	0	0	0	0	0	0	0	10	0	3	1	0	0	1	0	0	0	0	0	0	0	1	0	0	3	2
OTU_901	Unassigned	Unassigned	Unassigned	Unassigned	Unassigned	Unassigned	Unassigned	330	101	3.27042e-05	0	0	31	0	0	0	0	0	0	0	0	0	0	0	0	0	3	0	0	0	0	0	0	4	1	0	0	0	0	0	0	0	0	1	0	0	11	7	0
OTU_1497	Unassigned	Unassigned	Unassigned	Unassigned	Unassigned	Unassigned	Unassigned	345	98	3.17328e-05	0	0	0	4	28	0	0	0	0	0	0	0	0	1	0	0	0	4	0	0	0	0	0	25	0	0	0	0	12	0	0	0	0	0	0	0	12	0	0
OTU_2205	Unassigned	Unassigned	Unassigned	Unassigned	Unassigned	Unassigned	Unassigned	340	98	3.17328e-05	0	0	0	0	4	0	0	0	0	0	0	0	0	0	0	0	0	4	0	0	0	0	0	27	6	0	1	1	5	0	0	0	0	13	0	0	0	3	0
OTU_1727	Unassigned	Unassigned	Unassigned	Unassigned	Unassigned	Unassigned	Unassigned	349	97	3.1409e-05	11	0	0	0	0	0	0	0	0	0	0	0	0	13	0	3	0	0	0	2	0	0	0	0	0	0	0	2	0	0	0	0	0	0	0	0	0	0	0
OTU_6049	Unassigned	Unassigned	Unassigned	Unassigned	Unassigned	Unassigned	Unassigned	348	97	3.1409e-05	0	0	0	18	3	0	0	0	0	0	0	0	0	0	0	0	40	0	0	0	0	0	0	5	0	0	0	3	3	0	0	1	0	0	0	0	0	0	0
OTU_5013	Unassigned	Unassigned	Unassigned	Unassigned	Unassigned	Unassigned	Unassigned	333	96	3.10852e-05	0	0	0	0	27	0	0	0	0	0	0	0	0	0	0	0	0	14	0	0	0	0	0	6	2	0	0	0	0	0	0	0	0	0	0	0	0	0	0
OTU_1531	Unassigned	Unassigned	Unassigned	Unassigned	Unassigned	Unassigned	Unassigned	333	95	3.07614e-05	0	0	8	0	11	0	0	0	0	0	0	0	0	0	0	0	4	2	0	0	0	0	0	7	0	2	7	0	0	0	0	0	0	0	0	0	8	1	0
OTU_1020	Unassigned	Unassigned	Unassigned	Unassigned	Unassigned	Unassigned	Unassigned	348	94	3.04376e-05	0	0	0	0	6	0	0	0	0	0	0	0	0	0	0	0	0	15	0	0	0	0	0	6	0	0	0	0	9	0	0	0	0	0	0	0	11	3	0
OTU_1191	Unassigned	Unassigned	Unassigned	Unassigned	Unassigned	Unassigned	Unassigned	357	94	3.04376e-05	0	0	0	0	0	0	0	0	0	0	0	0	0	0	0	0	0	0	0	1	0	0	0	0	0	0	0	0	0	0	93	0	0	0	0	0	0	0	0
OTU_2833	Unassigned	Unassigned	Unassigned	Unassigned	Unassigned	Unassigned	Unassigned	354	93	3.01138e-05	0	0	0	0	0	0	7	23	0	0	0	0	0	11	0	0	0	0	0	0	3	0	0	0	0	0	0	0	0	0	0	0	0	0	0	0	0	0	0
OTU_1919	Unassigned	Unassigned	Unassigned	Unassigned	Unassigned	Unassigned	Unassigned	370	92	2.979e-05	0	0	0	0	0	0	0	0	0	0	0	0	0	0	0	0	0	0	0	0	0	0	1	0	0	0	0	0	0	0	0	15	0	9	5	0	0	0	0
OTU_1386	Unassigned	Unassigned	Unassigned	Unassigned	Unassigned	Unassigned	Unassigned	353	91	2.94662e-05	0	0	0	0	0	0	0	0	0	0	0	0	0	0	0	0	0	43	0	0	0	0	0	0	0	0	0	0	0	0	6	0	0	0	0	0	16	12	0
OTU_1519	Unassigned	Unassigned	Unassigned	Unassigned	Unassigned	Unassigned	Unassigned	341	91	2.94662e-05	0	0	0	0	0	0	0	0	0	0	0	0	0	0	0	0	0	0	0	0	0	0	0	0	0	0	0	0	0	0	0	0	0	0	0	17	0	0	0
OTU_1398	Unassigned	Unassigned	Unassigned	Unassigned	Unassigned	Unassigned	Unassigned	355	89	2.88186e-05	0	0	0	0	0	0	0	0	0	0	12	0	0	0	0	0	0	0	0	0	0	0	0	0	0	0	0	0	0	0	0	0	0	0	17	0	0	0	0
OTU_1813	Unassigned	Unassigned	Unassigned	Unassigned	Unassigned	Unassigned	Unassigned	393	89	2.88186e-05	0	0	0	0	0	0	0	0	0	0	0	0	0	0	0	0	0	0	0	0	0	0	0	0	0	0	0	0	0	0	0	0	0	0	88	0	0	0	0
OTU_1322	Unassigned	Unassigned	Unassigned	Unassigned	Unassigned	Unassigned	Unassigned	333	88	2.84948e-05	0	0	4	0	66	0	0	0	0	0	0	0	0	0	0	0	0	1	0	0	0	0	0	0	0	0	0	0	9	0	0	0	0	0	0	0	0	0	0
OTU_1450	Unassigned	Unassigned	Unassigned	Unassigned	Unassigned	Unassigned	Unassigned	339	88	2.84948e-05	0	0	0	0	5	0	0	0	0	0	0	0	0	0	0	0	0	0	0	0	0	0	0	0	0	0	0	0	0	0	0	0	0	0	0	0	0	0	0
OTU_2561	Unassigned	Unassigned	Unassigned	Unassigned	Unassigned	Unassigned	Unassigned	326	88	2.84948e-05	0	0	0	0	10	0	0	0	0	0	0	0	0	0	0	0	0	0	0	0	0	0	0	0	0	0	0	2	73	0	0	0	0	0	0	0	0	0	0
OTU_8332	Unassigned	Unassigned	Unassigned	Unassigned	Unassigned	Unassigned	Unassigned	331	88	2.84948e-05	8	0	0	0	0	3	4	0	0	0	2	0	0	0	38	0	3	0	0	0	0	0	0	0	2	0	0	0	0	0	1	4	0	0	0	0	0	0	3
OTU_1297	Unassigned	Unassigned	Unassigned	Unassigned	Unassigned	Unassigned	Unassigned	340	87	2.81709e-05	0	0	2	1	2	0	0	0	0	0	0	0	0	0	0	0	0	0	0	0	0	0	0	8	0	0	3	0	0	0	0	10	0	0	0	0	0	0	0
OTU_1380	Unassigned	Unassigned	Unassigned	Unassigned	Unassigned	Unassigned	Unassigned	367	86	2.78471e-05	4	0	0	0	0	0	0	0	0	0	2	0	6	0	7	0	0	0	0	0	3	0	0	2	0	3	0	0	0	0	0	25	0	0	3	0	3	0	2
OTU_1027	Unassigned	Unassigned	Unassigned	Unassigned	Unassigned	Unassigned	Unassigned	330	85	2.75233e-05	0	0	0	4	0	0	0	0	0	0	0	0	0	0	0	0	0	0	0	0	0	0	0	0	0	0	0	0	0	0	0	0	0	0	0	0	0	0	0
OTU_1101	Unassigned	Unassigned	Unassigned	Unassigned	Unassigned	Unassigned	Unassigned	335	85	2.75233e-05	85	0	0	0	0	0	0	0	0	0	0	0	0	0	0	0	0	0	0	0	0	0	0	0	0	0	0	0	0	0	0	0	0	0	0	0	0	0	0
OTU_1260	Unassigned	Unassigned	Unassigned	Unassigned	Unassigned	Unassigned	Unassigned	340	85	2.75233e-05	0	0	24	2	4	0	0	0	0	0	0	0	0	0	0	0	1	0	0	0	0	0	15	0	0	0	0	0	0	0	0	0	0	5	0	0	0	0	0
OTU_1276	Unassigned	Unassigned	Unassigned	Unassigned	Unassigned	Unassigned	Unassigned	347	85	2.75233e-05	0	0	0	0	0	0	0	0	0	0	0	0	0	0	0	0	1	0	0	0	0	0	0	0	0	0	0	0	0	0	0	0	0	0	0	0	0	11	0
OTU_1096	Unassigned	Unassigned	Unassigned	Unassigned	Unassigned	Unassigned	Unassigned	334	84	2.71995e-05	0	0	0	0	0	0	0	0	0	0	0	0	0	0	0	0	0	0	0	0	0	2	0	0	0	0	16	0	0	0	0	0	0	0	0	0	0	0	0
OTU_1214	Unassigned	Unassigned	Unassigned	Unassigned	Unassigned	Unassigned	Unassigned	341	84	2.71995e-05	0	0	3	8	0	0	0	0	0	0	0	0	0	0	0	1	0	0	0	0	0	0	0	0	0	0	0	0	0	0	0	5	0	0	0	0	3	10	0
OTU_3952	Unassigned	Unassigned	Unassigned	Unassigned	Unassigned	Unassigned	Unassigned	344	84	2.71995e-05	0	0	0	0	0	0	0	0	0	0	0	0	0	0	0	0	0	0	0	0	0	0	0	0	0	0	0	0	0	0	0	0	0	0	0	0	3	1	0
OTU_8698	Unassigned	Unassigned	Unassigned	Unassigned	Unassigned	Unassigned	Unassigned	344	83	2.68757e-05	0	0	0	0	7	0	0	0	0	0	0	0	0	0	0	0	2	0	0	0	0	0	0	31	1	0	0	0	0	0	0	0	0	3	0	0	0	5	0
OTU_1364	Unassigned	Unassigned	Unassigned	Unassigned	Unassigned	Unassigned	Unassigned	345	82	2.65519e-05	0	0	0	0	0	0	0	0	0	0	2	0	0	0	0	0	0	0	0	0	0	0	0	0	0	0	0	0	0	0	0	0	0	0	76	0	0	0	0
OTU_1205	Unassigned	Unassigned	Unassigned	Unassigned	Unassigned	Unassigned	Unassigned	348	80	2.59043e-05	0	0	0	0	0	0	0	0	0	0	0	0	0	0	0	0	0	0	0	0	0	0	0	0	0	0	0	0	0	0	0	0	0	0	80	0	0	0	0
OTU_1330	Unassigned	Unassigned	Unassigned	Unassigned	Unassigned	Unassigned	Unassigned	333	80	2.59043e-05	0	0	36	0	11	0	0	0	0	0	0	0	0	0	0	0	0	0	0	0	0	0	0	0	0	1	12	0	0	0	0	0	0	0	0	0	8	0	0
OTU_4280	Unassigned	Unassigned	Unassigned	Unassigned	Unassigned	Unassigned	Unassigned	333	80	2.59043e-05	0	0	0	0	0	0	0	0	0	0	0	0	0	0	0	0	0	0	0	0	0	0	0	0	0	0	0	0	1	0	0	0	0	0	0	0	0	0	0
OTU_1795	Unassigned	Unassigned	Unassigned	Unassigned	Unassigned	Unassigned	Unassigned	335	79	2.55805e-05	0	0	0	0	0	0	0	0	48	0	0	0	0	0	17	0	0	0	0	0	1	0	0	0	0	0	0	0	0	0	0	0	0	0	0	0	0	0	0
OTU_1048	Unassigned	Unassigned	Unassigned	Unassigned	Unassigned	Unassigned	Unassigned	357	75	2.42853e-05	0	0	0	0	0	0	0	0	0	0	0	0	0	0	0	0	0	0	0	0	0	0	3	0	0	0	0	0	0	0	0	0	0	0	0	0	4	3	0
OTU_1300	Unassigned	Unassigned	Unassigned	Unassigned	Unassigned	Unassigned	Unassigned	331	75	2.42853e-05	0	0	0	0	0	0	0	0	0	0	0	0	0	0	0	0	0	0	0	0	0	0	0	0	0	0	0	0	1	0	0	0	0	0	0	0	4	0	8
OTU_1396	Unassigned	Unassigned	Unassigned	Unassigned	Unassigned	Unassigned	Unassigned	343	75	2.42853e-05	0	0	0	0	0	0	0	75	0	0	0	0	0	0	0	0	0	0	0	0	0	0	0	0	0	0	0	0	0	0	0	0	0	0	0	0	0	0	0
OTU_2009	Unassigned	Unassigned	Unassigned	Unassigned	Unassigned	Unassigned	Unassigned	345	75	2.42853e-05	0	0	0	2	1	0	0	0	0	0	0	0	0	0	0	0	0	2	0	0	0	0	0	0	0	0	0	0	0	0	0	0	0	0	0	0	6	18	0
OTU_1290	Unassigned	Unassigned	Unassigned	Unassigned	Unassigned	Unassigned	Unassigned	331	74	2.39615e-05	0	0	0	0	0	0	0	0	0	0	0	0	0	0	0	0	0	0	0	0	0	0	4	9	0	0	0	0	0	0	0	0	0	0	0	0	0	0	0
OTU_1319	Unassigned	Unassigned	Unassigned	Unassigned	Unassigned	Unassigned	Unassigned	353	73	2.36377e-05	0	0	0	0	0	0	0	0	0	0	3	0	0	0	0	0	0	0	0	0	0	0	0	0	0	0	0	0	0	0	0	4	0	0	42	0	0	0	0
OTU_2148	Unassigned	Unassigned	Unassigned	Unassigned	Unassigned	Unassigned	Unassigned	340	73	2.36377e-05	0	0	6	0	23	0	0	0	0	0	0	0	0	0	0	0	0	0	0	0	0	0	0	8	0	0	0	0	2	0	0	0	0	0	0	0	0	0	0
OTU_1501	Unassigned	Unassigned	Unassigned	Unassigned	Unassigned	Unassigned	Unassigned	361	72	2.33139e-05	0	0	29	0	0	0	0	0	0	0	0	0	0	0	0	0	0	0	0	0	0	0	0	2	1	0	0	0	0	0	0	0	0	0	0	0	0	0	0
OTU_2355	Unassigned	Unassigned	Unassigned	Unassigned	Unassigned	Unassigned	Unassigned	344	72	2.33139e-05	0	0	0	0	0	0	0	0	0	0	3	0	0	5	0	0	0	0	0	0	0	0	0	0	0	0	0	0	0	0	0	0	0	0	0	0	0	0	0
OTU_1270	Unassigned	Unassigned	Unassigned	Unassigned	Unassigned	Unassigned	Unassigned	336	71	2.29901e-05	0	0	0	0	0	0	3	0	0	0	3	0	0	0	4	0	0	0	0	0	0	0	0	0	0	0	0	0	0	0	0	0	0	0	43	0	0	0	0
OTU_1494	Unassigned	Unassigned	Unassigned	Unassigned	Unassigned	Unassigned	Unassigned	336	71	2.29901e-05	0	0	0	0	0	0	0	0	0	0	4	0	0	0	0	0	0	0	0	0	30	0	0	0	0	0	0	0	0	0	0	0	0	0	0	0	0	0	0
OTU_1225	Unassigned	Unassigned	Unassigned	Unassigned	Unassigned	Unassigned	Unassigned	336	70	2.26663e-05	0	0	0	0	57	0	0	0	0	0	0	0	0	0	0	0	0	0	0	0	0	0	0	0	0	0	0	0	0	0	0	0	0	0	0	0	0	5	0
OTU_1368	Unassigned	Unassigned	Unassigned	Unassigned	Unassigned	Unassigned	Unassigned	341	70	2.26663e-05	0	0	24	0	0	0	0	0	0	0	0	0	0	0	0	0	0	0	0	0	0	0	0	0	0	0	0	0	0	0	0	0	0	0	0	0	0	13	0
OTU_1732	Unassigned	Unassigned	Unassigned	Unassigned	Unassigned	Unassigned	Unassigned	335	70	2.26663e-05	0	0	0	0	0	0	0	0	0	0	0	0	0	0	0	0	0	3	0	0	0	0	0	0	0	0	0	0	0	0	0	0	0	0	0	0	0	2	0
OTU_1312	Unassigned	Unassigned	Unassigned	Unassigned	Unassigned	Unassigned	Unassigned	348	69	2.23425e-05	0	0	0	0	0	0	0	0	0	0	0	0	0	0	0	0	0	0	0	0	0	0	0	0	0	0	0	0	0	0	0	0	0	0	4	42	0	0	0
OTU_1634	Unassigned	Unassigned	Unassigned	Unassigned	Unassigned	Unassigned	Unassigned	333	69	2.23425e-05	0	0	4	12	8	0	0	0	0	0	0	0	0	0	0	0	1	0	0	0	2	0	0	8	0	0	0	0	0	0	0	0	0	3	0	0	0	0	0
OTU_1684	Unassigned	Unassigned	Unassigned	Unassigned	Unassigned	Unassigned	Unassigned	344	69	2.23425e-05	0	0	0	0	0	0	0	0	0	0	0	0	0	2	0	0	0	0	0	36	0	0	0	0	0	0	0	0	0	0	0	4	0	0	0	0	0	0	0
OTU_2555	Unassigned	Unassigned	Unassigned	Unassigned	Unassigned	Unassigned	Unassigned	340	69	2.23425e-05	0	0	2	3	5	0	0	0	0	0	0	0	0	0	0	0	0	0	0	0	2	0	5	1	0	0	2	0	0	0	0	2	0	0	2	0	0	0	0
OTU_5996	Unassigned	Unassigned	Unassigned	Unassigned	Unassigned	Unassigned	Unassigned	356	69	2.23425e-05	0	0	0	0	10	0	0	0	0	0	0	0	0	0	0	0	2	10	0	0	0	0	0	0	0	0	0	0	0	0	0	0	0	0	0	0	2	0	0
OTU_8209	Unassigned	Unassigned	Unassigned	Unassigned	Unassigned	Unassigned	Unassigned	348	69	2.23425e-05	0	0	0	0	0	0	0	0	0	0	0	0	0	0	0	0	0	0	0	0	0	0	0	0	0	2	0	0	0	0	0	0	0	0	0	0	0	2	0
OTU_1259	Unassigned	Unassigned	Unassigned	Unassigned	Unassigned	Unassigned	Unassigned	330	68	2.20187e-05	0	0	0	0	8	0	0	0	0	0	0	0	0	0	0	0	0	2	0	0	0	0	0	15	3	0	0	4	2	0	0	0	0	0	0	0	0	0	0
OTU_1265	Unassigned	Unassigned	Unassigned	Unassigned	Unassigned	Unassigned	Unassigned	356	68	2.20187e-05	0	0	0	0	0	0	0	0	0	48	0	7	0	0	0	0	0	0	10	0	0	0	0	0	0	0	0	0	0	0	0	0	0	0	0	0	0	0	0
OTU_1969	Unassigned	Unassigned	Unassigned	Unassigned	Unassigned	Unassigned	Unassigned	354	68	2.20187e-05	0	0	0	0	0	0	0	0	0	0	0	0	0	0	0	0	0	7	0	0	0	0	0	6	0	0	0	0	0	0	0	0	0	0	0	0	6	15	0
OTU_2267	Unassigned	Unassigned	Unassigned	Unassigned	Unassigned	Unassigned	Unassigned	333	68	2.20187e-05	0	0	5	0	0	0	2	0	0	0	2	0	0	16	0	0	0	0	0	0	0	0	0	0	0	1	1	0	0	0	0	0	0	0	0	0	0	4	0
OTU_2459	Unassigned	Unassigned	Unassigned	Unassigned	Unassigned	Unassigned	Unassigned	333	68	2.20187e-05	0	0	0	0	0	0	0	0	0	0	0	0	0	0	0	0	0	0	0	0	0	0	0	0	0	2	8	0	2	0	0	0	0	0	0	0	0	0	0
OTU_1203	Unassigned	Unassigned	Unassigned	Unassigned	Unassigned	Unassigned	Unassigned	356	67	2.16949e-05	0	0	0	0	6	0	0	0	0	0	0	0	0	0	0	0	0	3	0	0	0	0	0	54	0	0	0	0	3	0	0	0	0	0	0	0	0	0	0
OTU_1204	Unassigned	Unassigned	Unassigned	Unassigned	Unassigned	Unassigned	Unassigned	353	66	2.13711e-05	0	0	0	0	0	0	0	0	0	0	0	0	0	0	0	0	0	0	0	0	0	0	0	6	4	0	0	0	0	0	0	0	0	0	0	0	0	0	0
OTU_1238	Unassigned	Unassigned	Unassigned	Unassigned	Unassigned	Unassigned	Unassigned	337	66	2.13711e-05	0	0	5	2	0	0	0	0	0	0	0	0	0	0	0	0	0	0	0	0	0	0	0	0	0	0	0	0	0	0	0	0	0	0	0	0	0	0	0
OTU_1774	Unassigned	Unassigned	Unassigned	Unassigned	Unassigned	Unassigned	Unassigned	349	66	2.13711e-05	0	0	0	0	0	0	0	0	0	0	0	0	0	0	0	0	0	6	0	0	0	0	0	3	1	0	0	0	0	0	0	0	0	0	0	0	8	9	0
OTU_6392	Unassigned	Unassigned	Unassigned	Unassigned	Unassigned	Unassigned	Unassigned	342	66	2.13711e-05	0	0	0	0	0	0	0	0	0	0	0	0	0	0	0	0	17	1	0	0	0	0	0	0	0	0	0	0	0	0	0	0	0	0	0	1	0	0	0
OTU_1333	Unassigned	Unassigned	Unassigned	Unassigned	Unassigned	Unassigned	Unassigned	343	65	2.10473e-05	0	0	0	0	0	0	0	0	0	0	0	0	0	0	0	0	0	0	0	0	0	0	0	0	0	0	0	0	0	0	0	0	0	0	0	0	0	0	0
OTU_1548	Unassigned	Unassigned	Unassigned	Unassigned	Unassigned	Unassigned	Unassigned	390	65	2.10473e-05	0	0	0	0	0	0	0	0	0	0	0	0	0	0	0	0	0	0	0	0	0	0	0	0	0	0	0	0	0	0	0	0	0	0	0	0	0	0	0
OTU_5396	Unassigned	Unassigned	Unassigned	Unassigned	Unassigned	Unassigned	Unassigned	333	65	2.10473e-05	0	0	0	0	0	0	0	0	0	0	0	0	0	0	0	0	3	0	0	0	0	0	0	0	0	0	0	0	0	0	0	1	0	0	0	0	26	4	0
OTU_1436	Unassigned	Unassigned	Unassigned	Unassigned	Unassigned	Unassigned	Unassigned	352	64	2.07235e-05	0	0	0	0	0	0	0	0	0	0	0	0	0	0	0	0	0	0	0	0	0	0	0	0	0	0	0	0	0	0	0	0	0	0	0	0	0	0	0
OTU_1572	Unassigned	Unassigned	Unassigned	Unassigned	Unassigned	Unassigned	Unassigned	343	64	2.07235e-05	0	0	0	0	56	0	0	0	0	0	0	0	0	0	0	0	0	0	0	0	0	0	0	8	0	0	0	0	0	0	0	0	0	0	0	0	0	0	0
OTU_1114	Unassigned	Unassigned	Unassigned	Unassigned	Unassigned	Unassigned	Unassigned	338	63	2.03997e-05	0	0	0	0	0	0	0	0	0	0	0	0	0	0	0	0	0	0	0	0	0	0	0	0	0	0	0	0	0	0	0	0	0	0	63	0	0	0	0
OTU_1527	Unassigned	Unassigned	Unassigned	Unassigned	Unassigned	Unassigned	Unassigned	342	63	2.03997e-05	0	0	0	0	0	0	0	0	0	0	0	0	0	20	0	0	0	0	0	0	0	0	0	0	0	0	0	0	0	0	17	0	0	0	0	0	0	0	0
OTU_1761	Unassigned	Unassigned	Unassigned	Unassigned	Unassigned	Unassigned	Unassigned	331	63	2.03997e-05	0	2	0	0	0	0	0	0	0	0	0	0	0	0	0	0	6	5	0	0	7	0	0	0	0	3	0	1	0	0	0	9	0	0	0	0	1	0	7
OTU_1777	Unassigned	Unassigned	Unassigned	Unassigned	Unassigned	Unassigned	Unassigned	343	63	2.03997e-05	0	0	2	0	22	0	0	0	0	0	0	0	0	0	0	0	0	0	0	0	0	0	0	2	2	0	0	0	0	0	0	0	0	0	0	0	0	0	0
OTU_3103	Unassigned	Unassigned	Unassigned	Unassigned	Unassigned	Unassigned	Unassigned	444	63	2.03997e-05	0	0	2	0	0	0	0	0	0	0	0	0	0	0	0	0	0	0	0	0	0	0	0	0	0	0	0	0	0	0	0	0	0	0	0	0	0	0	0
OTU_1594	Unassigned	Unassigned	Unassigned	Unassigned	Unassigned	Unassigned	Unassigned	328	62	2.00758e-05	0	0	12	0	3	0	0	0	0	0	0	0	0	0	0	0	0	0	0	0	0	0	0	0	4	2	0	3	0	0	0	0	0	0	0	0	1	0	0
OTU_1665	Unassigned	Unassigned	Unassigned	Unassigned	Unassigned	Unassigned	Unassigned	329	62	2.00758e-05	8	0	0	0	0	0	0	0	0	0	0	0	0	13	0	4	0	0	0	0	19	0	0	0	0	0	0	0	0	0	0	0	0	0	0	0	0	0	0
OTU_1970	Unassigned	Unassigned	Unassigned	Unassigned	Unassigned	Unassigned	Unassigned	351	62	2.00758e-05	0	0	0	0	0	0	3	0	0	0	0	0	0	0	0	0	0	0	0	0	0	0	0	0	0	0	1	0	0	0	0	0	0	0	0	0	0	0	0
OTU_4362	Unassigned	Unassigned	Unassigned	Unassigned	Unassigned	Unassigned	Unassigned	342	61	1.9752e-05	0	0	0	0	0	0	0	0	0	0	0	0	0	0	0	0	0	31	0	0	0	0	0	14	0	0	0	0	0	0	0	0	0	0	0	0	0	0	0
OTU_2231	Unassigned	Unassigned	Unassigned	Unassigned	Unassigned	Unassigned	Unassigned	490	60	1.94282e-05	0	0	0	0	0	0	3	6	0	0	0	0	0	0	0	2	0	0	0	2	3	0	0	0	0	2	0	0	0	0	5	1	0	0	6	0	0	0	3
OTU_2505	Unassigned	Unassigned	Unassigned	Unassigned	Unassigned	Unassigned	Unassigned	323	60	1.94282e-05	0	0	0	0	0	0	0	0	0	0	0	0	0	9	0	0	7	0	0	0	0	0	3	11	0	0	1	0	0	0	0	0	0	0	20	0	0	0	0
OTU_1936	Unassigned	Unassigned	Unassigned	Unassigned	Unassigned	Unassigned	Unassigned	342	59	1.91044e-05	0	0	9	4	11	0	0	0	0	0	0	0	0	0	0	0	1	0	0	0	0	0	0	7	0	0	0	1	0	0	0	2	0	0	0	0	0	0	0
OTU_5905	Unassigned	Unassigned	Unassigned	Unassigned	Unassigned	Unassigned	Unassigned	452	59	1.91044e-05	0	0	4	0	0	0	0	0	0	0	0	0	0	0	0	0	0	3	0	0	0	0	0	5	1	0	2	0	0	0	0	0	0	0	0	0	0	4	0
OTU_6015	Unassigned	Unassigned	Unassigned	Unassigned	Unassigned	Unassigned	Unassigned	355	59	1.91044e-05	0	0	0	0	0	0	0	0	0	0	0	0	0	0	0	0	0	0	0	0	0	0	0	0	0	0	0	0	0	0	0	0	0	0	59	0	0	0	0
OTU_1144	Unassigned	Unassigned	Unassigned	Unassigned	Unassigned	Unassigned	Unassigned	314	58	1.87806e-05	0	0	0	0	0	0	0	0	0	1	3	0	0	0	0	0	0	0	0	0	0	0	0	0	0	0	0	0	0	0	2	0	0	0	0	0	0	0	0
OTU_1294	Unassigned	Unassigned	Unassigned	Unassigned	Unassigned	Unassigned	Unassigned	430	58	1.87806e-05	0	0	0	0	0	0	0	0	0	0	0	0	0	0	0	0	0	0	58	0	0	0	0	0	0	0	0	0	0	0	0	0	0	0	0	0	0	0	0
OTU_1557	Unassigned	Unassigned	Unassigned	Unassigned	Unassigned	Unassigned	Unassigned	343	58	1.87806e-05	0	0	0	0	0	0	0	0	0	0	0	0	0	0	0	0	0	0	0	0	0	0	0	0	0	0	0	0	0	0	0	0	0	0	0	0	0	0	0
OTU_1891	Unassigned	Unassigned	Unassigned	Unassigned	Unassigned	Unassigned	Unassigned	357	58	1.87806e-05	0	0	0	0	0	0	3	0	0	0	3	0	0	0	5	0	0	0	0	0	0	0	0	2	0	0	0	0	0	0	0	0	0	0	34	0	0	0	0
OTU_3813	Unassigned	Unassigned	Unassigned	Unassigned	Unassigned	Unassigned	Unassigned	445	58	1.87806e-05	0	0	3	0	0	0	0	0	0	0	0	0	0	0	0	0	2	0	0	0	0	0	0	11	2	0	0	0	0	0	0	0	0	0	0	0	11	0	0
OTU_5219	Unassigned	Unassigned	Unassigned	Unassigned	Unassigned	Unassigned	Unassigned	331	58	1.87806e-05	0	0	0	4	0	5	4	0	0	0	0	0	4	1	0	0	4	0	0	0	1	2	0	0	0	0	0	1	0	0	7	0	0	2	1	0	3	0	3
OTU_1369	Unassigned	Unassigned	Unassigned	Unassigned	Unassigned	Unassigned	Unassigned	352	57	1.84568e-05	0	0	0	0	0	0	0	0	0	0	0	0	0	0	0	0	0	0	0	0	0	0	0	0	0	0	0	0	0	0	0	0	0	0	54	0	0	0	0
OTU_2057	Unassigned	Unassigned	Unassigned	Unassigned	Unassigned	Unassigned	Unassigned	367	57	1.84568e-05	0	0	0	0	6	0	0	0	0	0	0	0	0	0	0	0	1	0	0	0	0	0	0	14	0	0	0	0	0	0	0	0	0	2	0	0	0	0	0
OTU_4708	Unassigned	Unassigned	Unassigned	Unassigned	Unassigned	Unassigned	Unassigned	326	57	1.84568e-05	0	0	0	0	0	0	0	0	0	0	0	0	0	0	0	0	0	0	0	0	0	0	0	0	0	0	0	0	0	0	0	0	0	1	0	0	0	0	0
OTU_7433	Unassigned	Unassigned	Unassigned	Unassigned	Unassigned	Unassigned	Unassigned	331	57	1.84568e-05	0	0	0	0	2	0	3	0	0	0	0	0	0	0	0	0	0	0	0	3	0	0	0	0	0	0	0	0	0	0	0	0	0	0	0	0	4	2	14
OTU_1370	Unassigned	Unassigned	Unassigned	Unassigned	Unassigned	Unassigned	Unassigned	350	56	1.8133e-05	0	0	0	0	0	0	0	0	0	0	0	0	0	0	0	0	0	0	0	0	0	0	0	0	0	0	0	0	0	0	0	0	0	0	0	0	0	0	0
OTU_1905	Unassigned	Unassigned	Unassigned	Unassigned	Unassigned	Unassigned	Unassigned	340	56	1.8133e-05	0	0	0	0	0	0	0	0	0	0	0	0	0	0	0	0	0	0	0	2	0	0	4	0	0	0	0	0	0	0	0	2	0	0	0	0	0	0	0
OTU_1252	Unassigned	Unassigned	Unassigned	Unassigned	Unassigned	Unassigned	Unassigned	338	55	1.78092e-05	0	0	0	0	0	0	0	0	0	0	0	0	0	0	0	0	0	0	0	0	0	0	0	0	0	0	0	0	0	0	0	0	0	0	55	0	0	0	0
OTU_1491	Unassigned	Unassigned	Unassigned	Unassigned	Unassigned	Unassigned	Unassigned	345	55	1.78092e-05	0	0	0	0	0	0	0	0	0	0	0	0	0	0	0	0	0	0	0	0	0	0	0	0	0	0	0	0	0	0	0	0	0	0	0	0	0	0	0
OTU_1935	Unassigned	Unassigned	Unassigned	Unassigned	Unassigned	Unassigned	Unassigned	342	55	1.78092e-05	0	0	3	2	0	0	0	0	0	0	0	0	0	0	0	0	0	5	0	0	0	0	0	13	0	0	0	0	0	0	0	0	0	1	0	0	7	4	0
OTU_3089	Unassigned	Unassigned	Unassigned	Unassigned	Unassigned	Unassigned	Unassigned	356	55	1.78092e-05	0	0	0	0	0	48	0	0	0	0	0	0	0	0	0	0	0	0	0	0	0	0	0	0	0	0	0	0	0	0	0	0	0	0	0	0	0	0	0
OTU_3258	Unassigned	Unassigned	Unassigned	Unassigned	Unassigned	Unassigned	Unassigned	354	55	1.78092e-05	0	0	0	0	0	0	0	0	0	0	0	0	0	0	0	0	0	0	0	0	0	0	0	0	0	4	0	0	0	0	0	0	0	0	0	3	0	0	0
OTU_1741	Unassigned	Unassigned	Unassigned	Unassigned	Unassigned	Unassigned	Unassigned	334	54	1.74854e-05	0	0	2	0	0	0	0	0	0	0	0	0	0	0	0	0	0	0	0	0	0	0	2	0	0	0	0	0	0	0	0	0	0	0	0	0	0	0	0
OTU_3428	Unassigned	Unassigned	Unassigned	Unassigned	Unassigned	Unassigned	Unassigned	375	54	1.74854e-05	5	0	0	0	0	0	0	0	0	0	0	0	0	0	0	0	0	0	0	1	0	0	0	0	0	0	0	0	0	0	0	19	0	0	8	0	0	0	0
OTU_1691	Unassigned	Unassigned	Unassigned	Unassigned	Unassigned	Unassigned	Unassigned	342	53	1.71616e-05	8	0	0	0	0	0	0	0	0	0	0	0	0	15	0	0	0	0	0	0	7	0	0	0	0	0	0	0	0	0	0	0	0	0	0	0	0	0	0
OTU_1720	Unassigned	Unassigned	Unassigned	Unassigned	Unassigned	Unassigned	Unassigned	434	53	1.71616e-05	0	0	3	0	0	0	0	0	0	0	0	0	0	0	0	0	0	0	0	0	0	0	0	8	0	0	0	0	0	0	0	0	0	2	0	0	0	0	0
OTU_3221	Unassigned	Unassigned	Unassigned	Unassigned	Unassigned	Unassigned	Unassigned	422	53	1.71616e-05	0	0	18	0	0	0	0	0	0	0	0	0	0	0	0	0	0	0	0	0	0	0	0	0	0	0	8	0	0	0	0	0	0	2	0	0	0	4	0
OTU_1423	Unassigned	Unassigned	Unassigned	Unassigned	Unassigned	Unassigned	Unassigned	379	52	1.68378e-05	0	0	0	0	0	0	0	3	0	0	0	0	0	1	5	0	7	0	0	0	0	0	0	0	0	2	0	0	0	0	3	0	0	0	0	0	0	0	0
OTU_1445	Unassigned	Unassigned	Unassigned	Unassigned	Unassigned	Unassigned	Unassigned	348	52	1.68378e-05	52	0	0	0	0	0	0	0	0	0	0	0	0	0	0	0	0	0	0	0	0	0	0	0	0	0	0	0	0	0	0	0	0	0	0	0	0	0	0
OTU_1722	Unassigned	Unassigned	Unassigned	Unassigned	Unassigned	Unassigned	Unassigned	362	52	1.68378e-05	0	0	0	0	0	0	0	2	0	0	2	0	0	0	0	0	0	0	0	0	0	0	0	0	0	0	0	0	0	0	0	0	0	0	17	0	0	0	0
OTU_1776	Unassigned	Unassigned	Unassigned	Unassigned	Unassigned	Unassigned	Unassigned	350	52	1.68378e-05	0	0	0	0	0	0	0	0	0	0	0	0	0	0	0	0	0	3	0	0	0	0	0	0	4	0	0	0	0	0	0	0	0	0	0	0	0	0	0
OTU_2150	Unassigned	Unassigned	Unassigned	Unassigned	Unassigned	Unassigned	Unassigned	400	52	1.68378e-05	0	3	0	0	0	0	0	0	0	0	0	0	0	0	0	0	0	0	0	0	0	0	0	0	0	0	0	0	0	0	0	0	0	0	0	0	0	0	0
OTU_2846	Unassigned	Unassigned	Unassigned	Unassigned	Unassigned	Unassigned	Unassigned	334	52	1.68378e-05	0	0	0	0	0	0	0	0	0	0	0	0	0	0	0	0	0	15	0	0	0	0	0	3	0	0	0	0	0	0	0	0	0	0	0	0	0	20	0
OTU_4288	Unassigned	Unassigned	Unassigned	Unassigned	Unassigned	Unassigned	Unassigned	433	52	1.68378e-05	0	0	1	0	8	0	0	0	0	0	0	0	0	0	0	0	0	0	0	0	0	0	0	18	0	0	0	0	0	0	0	0	0	0	0	0	0	0	0
OTU_6115	Unassigned	Unassigned	Unassigned	Unassigned	Unassigned	Unassigned	Unassigned	470	52	1.68378e-05	0	0	12	0	0	0	0	0	0	0	0	0	0	0	0	0	0	0	0	0	0	0	3	0	0	2	6	0	0	0	0	0	0	0	0	0	0	1	0
OTU_1612	Unassigned	Unassigned	Unassigned	Unassigned	Unassigned	Unassigned	Unassigned	342	51	1.6514e-05	0	0	1	39	0	0	0	0	0	0	0	0	0	0	0	0	0	0	0	0	0	0	0	0	0	0	0	0	0	0	0	0	0	0	0	0	0	0	0
OTU_1996	Unassigned	Unassigned	Unassigned	Unassigned	Unassigned	Unassigned	Unassigned	337	51	1.6514e-05	0	0	0	0	0	0	0	0	0	0	0	0	0	0	0	0	0	0	0	0	0	0	0	0	0	0	0	0	0	0	0	0	0	3	0	0	0	0	0
OTU_2751	Unassigned	Unassigned	Unassigned	Unassigned	Unassigned	Unassigned	Unassigned	335	51	1.6514e-05	0	0	0	0	0	0	0	0	0	0	0	0	0	0	0	0	1	20	0	0	0	0	0	0	2	0	0	0	0	0	0	0	0	0	0	0	17	9	0
OTU_5892	Unassigned	Unassigned	Unassigned	Unassigned	Unassigned	Unassigned	Unassigned	449	51	1.6514e-05	0	0	0	9	2	0	0	0	0	0	0	0	0	0	0	0	13	0	0	0	0	0	0	17	0	0	0	0	0	0	0	0	0	0	0	0	6	0	0
OTU_1675	Unassigned	Unassigned	Unassigned	Unassigned	Unassigned	Unassigned	Unassigned	342	50	1.61902e-05	0	0	0	0	0	0	0	0	0	0	2	18	0	0	0	0	0	0	2	0	0	0	0	0	0	0	0	0	0	0	0	7	0	0	0	5	0	0	0
OTU_1705	Unassigned	Unassigned	Unassigned	Unassigned	Unassigned	Unassigned	Unassigned	352	50	1.61902e-05	0	0	0	0	0	0	0	0	0	0	0	0	0	0	0	0	13	13	0	0	0	0	0	6	0	0	0	0	0	0	0	0	0	0	0	0	0	1	0
OTU_1898	Unassigned	Unassigned	Unassigned	Unassigned	Unassigned	Unassigned	Unassigned	342	50	1.61902e-05	0	0	0	0	0	3	2	39	0	0	0	0	0	0	0	2	0	4	0	0	0	0	0	0	0	0	0	0	0	0	0	0	0	0	0	0	0	0	0
OTU_2965	Unassigned	Unassigned	Unassigned	Unassigned	Unassigned	Unassigned	Unassigned	342	50	1.61902e-05	0	0	11	0	6	0	0	0	0	0	0	0	0	0	0	0	0	0	0	0	0	0	0	0	0	0	0	0	2	0	0	0	0	0	0	0	0	2	0
OTU_4546	Unassigned	Unassigned	Unassigned	Unassigned	Unassigned	Unassigned	Unassigned	342	50	1.61902e-05	0	0	6	0	0	0	0	0	0	0	0	0	0	0	0	0	0	0	0	0	0	0	0	0	0	0	0	0	1	0	0	0	0	1	0	0	0	1	0
OTU_1473	Unassigned	Unassigned	Unassigned	Unassigned	Unassigned	Unassigned	Unassigned	350	49	1.58664e-05	0	0	0	0	3	0	0	0	0	0	0	0	0	0	0	0	0	0	0	0	0	0	0	0	0	0	0	0	6	0	0	0	0	0	0	0	0	0	0
OTU_1487	Unassigned	Unassigned	Unassigned	Unassigned	Unassigned	Unassigned	Unassigned	347	49	1.58664e-05	0	0	0	0	0	0	0	0	0	0	0	0	0	0	0	0	0	0	0	0	0	0	0	0	0	0	0	0	0	0	0	0	0	0	47	0	0	0	0
OTU_1839	Unassigned	Unassigned	Unassigned	Unassigned	Unassigned	Unassigned	Unassigned	347	49	1.58664e-05	0	0	0	0	0	0	0	0	0	0	0	0	0	0	0	0	0	0	0	0	0	0	0	0	0	0	0	0	0	0	0	0	0	0	0	0	0	0	0
OTU_2116	Unassigned	Unassigned	Unassigned	Unassigned	Unassigned	Unassigned	Unassigned	338	49	1.58664e-05	6	0	0	0	0	0	0	0	0	0	0	0	0	0	0	0	0	0	0	0	0	0	0	0	0	0	0	0	0	0	14	0	0	0	0	0	0	0	0
OTU_2651	Unassigned	Unassigned	Unassigned	Unassigned	Unassigned	Unassigned	Unassigned	395	49	1.58664e-05	0	0	6	0	1	0	0	0	0	0	0	0	0	0	0	0	0	10	0	0	0	0	0	0	0	0	0	9	0	0	0	0	0	0	0	0	10	7	0
OTU_3602	Unassigned	Unassigned	Unassigned	Unassigned	Unassigned	Unassigned	Unassigned	334	49	1.58664e-05	0	0	0	0	0	0	0	0	0	0	0	0	0	0	0	0	0	0	0	0	0	0	7	0	0	0	0	0	0	0	0	3	0	0	0	0	0	0	0
OTU_5157	Unassigned	Unassigned	Unassigned	Unassigned	Unassigned	Unassigned	Unassigned	336	49	1.58664e-05	0	0	2	0	2	0	0	0	0	0	0	0	0	0	0	0	2	7	0	0	0	0	0	1	3	0	0	0	2	0	0	0	0	0	0	0	0	4	0
OTU_2982	Unassigned	Unassigned	Unassigned	Unassigned	Unassigned	Unassigned	Unassigned	336	48	1.55426e-05	0	0	0	0	0	0	0	0	0	0	0	0	0	0	0	0	0	0	0	0	0	0	31	3	0	0	0	0	0	0	0	0	0	0	0	0	0	0	0
OTU_3364	Unassigned	Unassigned	Unassigned	Unassigned	Unassigned	Unassigned	Unassigned	350	48	1.55426e-05	0	0	0	0	0	0	0	0	0	0	0	0	0	0	0	0	0	0	0	0	0	0	0	4	0	0	0	0	0	0	0	0	0	12	0	0	0	0	0
OTU_4932	Unassigned	Unassigned	Unassigned	Unassigned	Unassigned	Unassigned	Unassigned	354	48	1.55426e-05	0	0	0	1	0	0	0	0	0	0	0	0	0	0	0	0	7	0	0	0	0	0	0	0	0	0	0	0	0	0	0	0	0	11	0	0	1	0	0
OTU_1407	Unassigned	Unassigned	Unassigned	Unassigned	Unassigned	Unassigned	Unassigned	334	46	1.4895e-05	0	0	0	0	0	0	0	0	0	0	0	0	0	0	0	0	0	0	0	0	0	0	0	0	0	0	0	0	0	0	0	0	0	0	0	0	0	0	0
OTU_2209	Unassigned	Unassigned	Unassigned	Unassigned	Unassigned	Unassigned	Unassigned	370	46	1.4895e-05	0	0	0	0	0	0	0	12	0	0	0	0	0	0	0	0	0	0	0	0	0	0	0	0	0	0	0	0	0	0	0	0	0	0	0	0	0	0	0
OTU_2276	Unassigned	Unassigned	Unassigned	Unassigned	Unassigned	Unassigned	Unassigned	314	46	1.4895e-05	0	0	0	0	0	0	0	0	0	0	0	0	0	0	0	0	0	0	0	0	0	0	0	0	0	0	0	0	0	0	0	0	0	0	0	0	0	0	0
OTU_3057	Unassigned	Unassigned	Unassigned	Unassigned	Unassigned	Unassigned	Unassigned	333	46	1.4895e-05	0	0	0	0	0	0	0	0	0	0	0	0	0	0	0	0	0	2	0	0	0	0	5	7	0	0	0	0	0	0	0	2	0	0	0	0	6	0	0
OTU_3752	Unassigned	Unassigned	Unassigned	Unassigned	Unassigned	Unassigned	Unassigned	343	46	1.4895e-05	0	0	0	0	0	0	0	0	0	0	0	0	0	0	0	0	0	0	0	0	0	0	0	10	0	0	0	0	1	0	0	0	0	0	0	0	16	0	0
OTU_1244	Unassigned	Unassigned	Unassigned	Unassigned	Unassigned	Unassigned	Unassigned	279	45	1.45712e-05	0	45	0	0	0	0	0	0	0	0	0	0	0	0	0	0	0	0	0	0	0	0	0	0	0	0	0	0	0	0	0	0	0	0	0	0	0	0	0
OTU_2072	Unassigned	Unassigned	Unassigned	Unassigned	Unassigned	Unassigned	Unassigned	351	45	1.45712e-05	0	0	0	0	0	0	0	0	0	0	0	0	0	0	0	0	0	0	0	0	0	0	0	0	0	0	0	0	0	0	0	0	0	0	0	0	0	0	0
OTU_2652	Unassigned	Unassigned	Unassigned	Unassigned	Unassigned	Unassigned	Unassigned	324	45	1.45712e-05	0	0	0	0	0	0	0	0	0	0	0	0	0	0	0	0	0	0	0	0	0	0	0	0	0	0	0	0	0	0	0	0	0	0	0	0	6	0	0
OTU_6815	Unassigned	Unassigned	Unassigned	Unassigned	Unassigned	Unassigned	Unassigned	340	45	1.45712e-05	0	0	0	0	0	0	0	0	0	0	0	0	0	0	0	0	0	0	0	8	0	0	0	0	0	0	0	0	0	0	0	0	0	0	2	0	0	0	0
OTU_1714	Unassigned	Unassigned	Unassigned	Unassigned	Unassigned	Unassigned	Unassigned	338	44	1.42474e-05	17	0	4	0	0	0	0	0	0	0	0	0	0	0	0	0	0	0	0	7	0	0	0	0	0	0	5	0	0	0	0	0	0	0	0	0	0	1	0
OTU_1834	Unassigned	Unassigned	Unassigned	Unassigned	Unassigned	Unassigned	Unassigned	340	44	1.42474e-05	0	0	0	0	0	0	0	11	0	0	0	0	0	0	0	0	0	0	0	0	0	0	0	0	0	0	0	0	0	0	12	0	0	0	0	0	0	0	0
OTU_3144	Unassigned	Unassigned	Unassigned	Unassigned	Unassigned	Unassigned	Unassigned	439	44	1.42474e-05	1	0	4	0	0	0	0	0	0	0	0	0	0	2	0	0	0	0	0	0	0	0	7	0	0	0	0	0	0	0	0	0	0	0	0	0	0	5	0
OTU_4403	Unassigned	Unassigned	Unassigned	Unassigned	Unassigned	Unassigned	Unassigned	345	44	1.42474e-05	0	0	0	0	0	0	0	0	0	0	0	0	0	0	0	0	0	14	0	0	0	0	0	0	0	0	0	0	0	0	0	0	0	0	0	0	17	3	0
OTU_1586	Unassigned	Unassigned	Unassigned	Unassigned	Unassigned	Unassigned	Unassigned	341	43	1.39236e-05	0	0	0	3	0	0	0	0	0	0	0	0	0	0	0	0	0	4	0	0	0	0	0	0	0	0	0	0	0	0	0	0	0	0	0	0	9	0	0
OTU_1845	Unassigned	Unassigned	Unassigned	Unassigned	Unassigned	Unassigned	Unassigned	398	43	1.39236e-05	0	0	0	0	0	0	0	0	0	0	0	0	0	0	0	0	0	0	0	0	0	0	0	0	0	0	0	0	0	0	0	0	0	0	43	0	0	0	0
OTU_2110	Unassigned	Unassigned	Unassigned	Unassigned	Unassigned	Unassigned	Unassigned	326	43	1.39236e-05	0	0	0	0	0	0	3	0	0	0	0	0	0	0	0	0	0	0	0	0	0	0	0	0	0	0	0	0	0	0	0	0	0	0	0	0	0	0	0
OTU_2766	Unassigned	Unassigned	Unassigned	Unassigned	Unassigned	Unassigned	Unassigned	340	43	1.39236e-05	0	0	0	3	0	0	0	0	0	0	0	0	0	0	0	0	0	0	0	0	0	0	0	1	0	0	0	0	3	0	0	0	0	6	1	0	0	6	0
OTU_3109	Unassigned	Unassigned	Unassigned	Unassigned	Unassigned	Unassigned	Unassigned	323	43	1.39236e-05	0	0	0	0	0	0	0	0	0	0	0	0	0	0	0	0	0	0	0	0	2	0	0	0	0	0	0	0	0	0	0	0	0	0	0	0	0	1	0
OTU_3460	Unassigned	Unassigned	Unassigned	Unassigned	Unassigned	Unassigned	Unassigned	318	43	1.39236e-05	4	0	0	0	0	0	0	0	0	0	0	0	0	4	0	0	0	0	0	0	7	0	0	0	0	0	0	0	0	0	0	0	0	0	0	0	0	0	0
OTU_6661	Unassigned	Unassigned	Unassigned	Unassigned	Unassigned	Unassigned	Unassigned	340	43	1.39236e-05	0	0	0	0	0	0	0	0	0	0	0	0	0	0	0	0	0	0	0	0	0	0	0	0	0	0	0	0	0	0	0	0	0	0	0	0	0	0	0
OTU_8093	Unassigned	Unassigned	Unassigned	Unassigned	Unassigned	Unassigned	Unassigned	331	43	1.39236e-05	0	0	0	0	0	0	0	0	0	0	0	0	0	0	0	0	0	0	0	0	0	0	0	0	0	0	0	0	0	0	0	1	0	0	0	0	0	0	0
OTU_1731	Unassigned	Unassigned	Unassigned	Unassigned	Unassigned	Unassigned	Unassigned	362	42	1.35998e-05	0	0	0	0	0	0	0	0	0	0	0	0	0	0	0	0	0	0	0	42	0	0	0	0	0	0	0	0	0	0	0	0	0	0	0	0	0	0	0
OTU_1806	Unassigned	Unassigned	Unassigned	Unassigned	Unassigned	Unassigned	Unassigned	342	42	1.35998e-05	0	0	0	1	0	0	0	0	0	0	0	0	0	0	0	0	0	0	0	0	0	0	0	0	0	0	0	0	0	0	0	0	0	6	0	0	0	0	0
OTU_2893	Unassigned	Unassigned	Unassigned	Unassigned	Unassigned	Unassigned	Unassigned	382	42	1.35998e-05	0	0	0	0	0	0	0	0	0	0	0	0	0	0	0	0	0	0	0	0	0	0	0	0	0	0	0	0	0	0	0	0	0	0	42	0	0	0	0
OTU_3363	Unassigned	Unassigned	Unassigned	Unassigned	Unassigned	Unassigned	Unassigned	340	42	1.35998e-05	0	0	0	0	0	0	0	0	0	0	0	0	0	0	0	0	0	2	0	0	0	0	0	0	0	0	0	0	0	0	0	0	0	0	0	0	11	10	0
OTU_4028	Unassigned	Unassigned	Unassigned	Unassigned	Unassigned	Unassigned	Unassigned	334	42	1.35998e-05	0	0	0	0	10	0	0	0	0	0	0	0	0	0	0	0	0	0	0	0	0	0	0	4	0	0	0	0	0	0	0	6	0	0	0	0	0	0	0
OTU_1670	Unassigned	Unassigned	Unassigned	Unassigned	Unassigned	Unassigned	Unassigned	335	41	1.3276e-05	0	0	0	0	0	0	0	0	0	0	0	0	0	0	0	0	0	0	0	0	0	0	0	0	0	0	0	0	0	0	0	0	0	0	0	0	0	0	0
OTU_1697	Unassigned	Unassigned	Unassigned	Unassigned	Unassigned	Unassigned	Unassigned	343	41	1.3276e-05	0	0	0	0	0	0	0	0	0	0	0	0	0	0	0	0	0	0	0	0	0	0	0	0	0	0	18	0	0	0	0	0	0	0	0	0	0	0	0
OTU_1979	Unassigned	Unassigned	Unassigned	Unassigned	Unassigned	Unassigned	Unassigned	423	41	1.3276e-05	11	0	0	0	0	0	0	0	0	0	0	0	0	0	0	0	0	0	0	1	0	0	0	0	0	0	0	0	0	0	0	0	0	0	0	0	3	1	0
OTU_2316	Unassigned	Unassigned	Unassigned	Unassigned	Unassigned	Unassigned	Unassigned	331	41	1.3276e-05	0	0	0	0	3	0	0	0	0	0	0	0	0	2	0	0	0	0	0	0	0	0	3	1	0	0	0	0	0	0	0	4	0	24	0	0	0	4	0
OTU_3480	Unassigned	Unassigned	Unassigned	Unassigned	Unassigned	Unassigned	Unassigned	342	41	1.3276e-05	0	0	0	1	10	0	0	0	0	0	0	0	0	0	0	0	4	0	0	0	0	5	0	0	0	0	3	0	0	0	0	0	0	0	2	0	0	0	0
OTU_3489	Unassigned	Unassigned	Unassigned	Unassigned	Unassigned	Unassigned	Unassigned	335	41	1.3276e-05	0	0	0	0	0	0	0	0	0	0	0	0	0	0	0	0	0	0	0	0	0	0	0	0	0	0	0	0	0	0	0	0	0	0	0	0	0	0	0
OTU_4003	Unassigned	Unassigned	Unassigned	Unassigned	Unassigned	Unassigned	Unassigned	448	41	1.3276e-05	0	0	1	0	0	0	0	0	0	0	0	0	0	0	0	0	0	0	0	0	0	0	0	0	0	0	0	0	0	0	0	0	0	0	0	0	0	0	0
OTU_1662	Unassigned	Unassigned	Unassigned	Unassigned	Unassigned	Unassigned	Unassigned	346	40	1.29522e-05	0	0	0	0	0	0	0	0	0	0	0	0	0	0	0	0	0	0	0	0	0	0	0	5	2	0	0	0	0	0	0	0	0	0	0	0	0	1	0
OTU_1696	Unassigned	Unassigned	Unassigned	Unassigned	Unassigned	Unassigned	Unassigned	344	40	1.29522e-05	0	0	0	0	0	0	0	0	0	0	0	0	0	0	0	0	0	0	0	0	0	0	0	0	0	0	0	0	0	0	0	0	0	0	0	0	0	0	0
OTU_1773	Unassigned	Unassigned	Unassigned	Unassigned	Unassigned	Unassigned	Unassigned	354	40	1.29522e-05	0	0	0	0	20	0	0	0	0	0	0	0	0	0	0	0	0	0	0	0	0	0	0	5	0	0	0	0	0	0	0	0	0	0	0	0	0	0	0
OTU_1957	Unassigned	Unassigned	Unassigned	Unassigned	Unassigned	Unassigned	Unassigned	333	40	1.29522e-05	3	0	0	0	0	0	2	0	0	0	0	0	0	3	0	0	0	0	0	0	6	0	0	0	0	0	0	0	0	0	0	0	0	0	0	0	0	0	3
OTU_1978	Unassigned	Unassigned	Unassigned	Unassigned	Unassigned	Unassigned	Unassigned	349	40	1.29522e-05	0	0	0	0	0	0	0	0	0	0	0	0	0	0	0	0	0	0	0	0	0	0	0	0	0	0	0	0	0	0	37	0	0	0	0	0	0	0	0
OTU_3204	Unassigned	Unassigned	Unassigned	Unassigned	Unassigned	Unassigned	Unassigned	339	40	1.29522e-05	0	0	0	0	0	0	0	0	0	0	0	0	0	0	0	0	0	0	0	0	0	0	0	0	0	0	0	0	0	0	0	0	0	0	0	0	0	0	0
OTU_3248	Unassigned	Unassigned	Unassigned	Unassigned	Unassigned	Unassigned	Unassigned	342	40	1.29522e-05	0	0	0	0	0	0	0	0	0	0	0	0	0	0	0	0	0	3	0	0	0	0	2	0	0	0	0	0	0	0	0	0	0	0	0	0	0	10	0
OTU_1442	Unassigned	Unassigned	Unassigned	Unassigned	Unassigned	Unassigned	Unassigned	344	39	1.26284e-05	0	0	0	0	0	0	0	0	0	0	0	0	0	0	0	0	0	0	0	0	0	0	0	0	0	0	0	0	0	0	0	0	0	0	0	0	0	0	0
OTU_1685	Unassigned	Unassigned	Unassigned	Unassigned	Unassigned	Unassigned	Unassigned	340	39	1.26284e-05	0	0	3	0	0	0	0	0	0	0	0	0	0	0	0	0	0	0	0	0	0	0	0	5	0	0	0	0	0	0	0	0	0	0	0	0	0	0	0
OTU_1871	Unassigned	Unassigned	Unassigned	Unassigned	Unassigned	Unassigned	Unassigned	329	39	1.26284e-05	27	0	0	0	0	0	0	0	0	0	0	0	0	0	0	0	0	0	0	0	0	0	0	0	0	0	0	0	0	0	0	0	0	0	0	0	0	0	0
OTU_2218	Unassigned	Unassigned	Unassigned	Unassigned	Unassigned	Unassigned	Unassigned	356	39	1.26284e-05	0	0	0	0	2	0	0	0	0	0	0	0	0	0	0	0	0	0	0	0	0	0	0	7	7	0	0	0	0	0	0	0	0	0	0	0	0	0	0
OTU_2266	Unassigned	Unassigned	Unassigned	Unassigned	Unassigned	Unassigned	Unassigned	343	39	1.26284e-05	0	0	0	2	5	0	0	0	0	0	0	0	0	0	0	0	4	0	0	0	0	0	0	3	0	0	0	1	0	0	0	0	0	0	0	0	0	0	0
OTU_2341	Unassigned	Unassigned	Unassigned	Unassigned	Unassigned	Unassigned	Unassigned	373	39	1.26284e-05	7	0	0	0	0	0	0	0	0	0	0	0	0	0	0	0	0	0	0	0	0	0	0	0	0	0	0	0	0	0	0	9	0	0	8	0	0	0	0
OTU_2408	Unassigned	Unassigned	Unassigned	Unassigned	Unassigned	Unassigned	Unassigned	352	39	1.26284e-05	0	0	0	0	0	0	0	0	0	0	0	0	0	0	0	0	11	0	0	0	0	0	0	7	0	0	0	0	0	0	0	0	0	0	0	0	0	0	0
OTU_2559	Unassigned	Unassigned	Unassigned	Unassigned	Unassigned	Unassigned	Unassigned	411	39	1.26284e-05	0	0	0	0	0	0	0	0	0	0	0	0	0	0	0	0	0	0	0	0	0	0	0	0	2	0	0	0	0	0	0	0	0	0	0	0	0	20	0
OTU_2886	Unassigned	Unassigned	Unassigned	Unassigned	Unassigned	Unassigned	Unassigned	344	39	1.26284e-05	2	0	2	0	0	0	0	0	0	0	0	0	0	4	0	0	0	0	0	0	0	0	0	0	0	0	0	0	0	0	16	0	0	0	0	0	0	0	0
OTU_7958	Unassigned	Unassigned	Unassigned	Unassigned	Unassigned	Unassigned	Unassigned	320	39	1.26284e-05	32	0	0	0	0	0	0	0	0	0	0	0	1	3	0	0	0	0	0	0	0	0	0	0	0	0	0	0	0	0	0	0	0	3	0	0	0	0	0
OTU_1702	Unassigned	Unassigned	Unassigned	Unassigned	Unassigned	Unassigned	Unassigned	346	38	1.23046e-05	0	0	0	0	0	0	0	0	0	0	0	0	0	0	0	0	0	0	0	0	0	0	0	0	0	0	0	0	0	0	0	0	0	0	37	0	0	0	0
OTU_2020	Unassigned	Unassigned	Unassigned	Unassigned	Unassigned	Unassigned	Unassigned	363	38	1.23046e-05	0	0	0	0	0	0	0	0	0	0	0	0	0	0	0	0	0	0	0	0	0	0	0	0	0	0	0	0	0	0	0	0	0	0	0	0	0	0	0
OTU_2352	Unassigned	Unassigned	Unassigned	Unassigned	Unassigned	Unassigned	Unassigned	343	38	1.23046e-05	0	0	0	0	0	0	0	0	0	0	0	0	0	0	0	0	0	0	0	0	0	0	0	0	0	0	0	0	0	0	0	0	0	0	0	0	0	0	0
OTU_2546	Unassigned	Unassigned	Unassigned	Unassigned	Unassigned	Unassigned	Unassigned	333	38	1.23046e-05	0	0	0	0	3	0	0	0	0	0	0	0	0	0	0	0	0	0	0	0	0	0	0	32	0	0	0	0	0	0	0	0	0	0	0	0	0	0	0
OTU_3011	Unassigned	Unassigned	Unassigned	Unassigned	Unassigned	Unassigned	Unassigned	334	38	1.23046e-05	0	0	0	0	0	0	0	0	0	0	0	0	0	0	0	0	0	14	0	0	0	0	0	7	2	0	0	0	3	0	0	0	0	0	0	0	0	4	0
OTU_3923	Unassigned	Unassigned	Unassigned	Unassigned	Unassigned	Unassigned	Unassigned	326	38	1.23046e-05	0	0	0	3	13	0	0	0	0	0	0	0	0	0	0	0	15	1	0	0	0	0	0	0	0	0	0	0	0	0	0	0	0	0	0	0	3	0	0
OTU_1569	Unassigned	Unassigned	Unassigned	Unassigned	Unassigned	Unassigned	Unassigned	341	37	1.19807e-05	0	0	0	0	0	2	14	0	0	0	0	0	0	3	0	0	0	0	0	0	2	0	0	0	0	0	0	0	0	0	9	0	0	0	4	0	0	0	0
OTU_1827	Unassigned	Unassigned	Unassigned	Unassigned	Unassigned	Unassigned	Unassigned	287	37	1.19807e-05	0	0	0	0	0	0	3	0	0	0	0	0	0	0	0	0	0	0	0	0	0	0	0	0	0	0	0	0	0	0	0	0	0	0	0	0	0	0	0
OTU_1858	Unassigned	Unassigned	Unassigned	Unassigned	Unassigned	Unassigned	Unassigned	323	37	1.19807e-05	0	0	5	4	0	0	0	0	0	0	0	0	0	0	0	0	0	0	0	0	0	0	1	0	0	0	0	0	0	0	0	0	0	0	0	0	0	2	0
OTU_1971	Unassigned	Unassigned	Unassigned	Unassigned	Unassigned	Unassigned	Unassigned	343	37	1.19807e-05	0	0	0	0	0	0	0	0	0	0	0	0	0	0	0	0	0	0	0	0	0	0	0	0	0	0	0	0	0	0	0	0	0	0	0	0	0	0	0
OTU_1986	Unassigned	Unassigned	Unassigned	Unassigned	Unassigned	Unassigned	Unassigned	345	37	1.19807e-05	0	0	0	0	0	0	0	0	0	0	0	0	0	0	0	0	0	0	0	0	0	0	0	0	0	0	0	0	0	0	0	0	0	0	0	0	0	0	0
OTU_2295	Unassigned	Unassigned	Unassigned	Unassigned	Unassigned	Unassigned	Unassigned	415	37	1.19807e-05	0	0	0	0	0	0	0	0	0	0	0	0	0	0	0	0	0	0	0	0	0	0	0	0	0	0	0	0	0	0	0	0	0	0	0	0	0	0	0
OTU_2879	Unassigned	Unassigned	Unassigned	Unassigned	Unassigned	Unassigned	Unassigned	326	37	1.19807e-05	0	0	0	0	0	0	0	0	0	0	0	0	0	0	0	0	15	2	0	0	0	0	0	0	0	0	4	0	0	0	0	0	0	0	10	0	2	0	0
OTU_2897	Unassigned	Unassigned	Unassigned	Unassigned	Unassigned	Unassigned	Unassigned	382	37	1.19807e-05	0	0	0	0	20	0	0	0	0	0	0	0	0	0	0	0	0	0	0	1	0	0	0	0	0	0	0	0	0	0	0	0	0	0	0	0	0	0	0
OTU_3291	Unassigned	Unassigned	Unassigned	Unassigned	Unassigned	Unassigned	Unassigned	342	37	1.19807e-05	0	0	0	0	0	0	0	0	0	0	0	0	0	0	0	0	0	6	0	0	0	0	0	0	0	0	0	0	10	0	0	0	0	0	0	0	0	0	0
OTU_4016	Unassigned	Unassigned	Unassigned	Unassigned	Unassigned	Unassigned	Unassigned	466	37	1.19807e-05	0	0	1	0	0	0	0	0	0	0	0	0	0	0	0	0	0	0	0	0	0	0	0	0	0	0	3	0	0	0	0	0	0	0	0	0	0	0	0
OTU_5941	Unassigned	Unassigned	Unassigned	Unassigned	Unassigned	Unassigned	Unassigned	334	37	1.19807e-05	0	0	0	0	0	0	0	0	0	0	0	0	0	0	0	0	0	0	0	0	0	0	0	1	0	0	0	0	0	0	0	0	0	0	0	0	2	1	0
OTU_1603	Unassigned	Unassigned	Unassigned	Unassigned	Unassigned	Unassigned	Unassigned	331	36	1.16569e-05	0	0	0	0	0	0	0	0	0	0	0	0	0	0	0	0	0	0	0	0	0	0	0	0	0	0	0	0	0	0	0	0	0	0	0	0	0	0	0
OTU_1745	Unassigned	Unassigned	Unassigned	Unassigned	Unassigned	Unassigned	Unassigned	276	36	1.16569e-05	0	0	0	0	0	0	0	0	0	2	0	9	0	0	0	0	0	0	0	0	0	0	0	0	0	0	0	0	0	0	0	0	0	0	0	0	0	0	0
OTU_2207	Unassigned	Unassigned	Unassigned	Unassigned	Unassigned	Unassigned	Unassigned	363	36	1.16569e-05	0	0	0	3	0	0	0	0	0	0	0	0	0	0	0	0	0	0	0	0	0	0	22	0	0	0	3	0	0	0	0	0	0	0	0	0	0	0	0
OTU_2280	Unassigned	Unassigned	Unassigned	Unassigned	Unassigned	Unassigned	Unassigned	331	36	1.16569e-05	0	0	0	0	0	0	0	0	0	0	0	0	0	4	0	0	0	0	0	0	0	0	0	0	0	0	2	0	0	0	0	0	0	4	0	0	0	0	0
OTU_2753	Unassigned	Unassigned	Unassigned	Unassigned	Unassigned	Unassigned	Unassigned	333	36	1.16569e-05	0	0	0	0	0	0	0	0	0	0	0	0	0	1	0	0	0	0	0	0	0	0	22	1	0	0	0	0	0	0	0	1	0	2	1	0	1	0	0
OTU_3249	Unassigned	Unassigned	Unassigned	Unassigned	Unassigned	Unassigned	Unassigned	408	36	1.16569e-05	0	0	0	0	0	0	0	0	0	0	0	0	0	0	0	0	0	0	0	0	0	0	0	13	0	0	0	0	3	0	0	0	0	0	0	0	0	0	0
OTU_5112	Unassigned	Unassigned	Unassigned	Unassigned	Unassigned	Unassigned	Unassigned	354	36	1.16569e-05	0	0	0	0	0	0	0	0	0	0	0	0	0	0	0	0	0	0	0	0	0	0	0	0	0	0	0	0	0	0	0	0	0	0	0	2	0	0	3
OTU_1812	Unassigned	Unassigned	Unassigned	Unassigned	Unassigned	Unassigned	Unassigned	334	35	1.13331e-05	0	0	0	0	0	5	0	0	0	0	0	0	0	0	2	0	0	0	0	0	0	0	0	0	0	0	0	0	0	0	0	1	0	0	0	0	0	0	0
OTU_2085	Unassigned	Unassigned	Unassigned	Unassigned	Unassigned	Unassigned	Unassigned	339	35	1.13331e-05	0	0	0	0	0	0	0	0	0	0	0	0	0	0	0	0	0	0	0	0	0	0	0	0	0	0	0	0	0	0	0	0	0	0	0	0	0	0	0
OTU_2471	Unassigned	Unassigned	Unassigned	Unassigned	Unassigned	Unassigned	Unassigned	444	35	1.13331e-05	0	0	0	0	0	0	0	0	0	0	0	0	0	0	0	0	0	0	0	0	0	0	14	0	0	0	0	0	0	0	0	0	0	0	0	0	0	0	0
OTU_2611	Unassigned	Unassigned	Unassigned	Unassigned	Unassigned	Unassigned	Unassigned	337	35	1.13331e-05	0	0	0	0	0	0	0	0	0	0	0	0	0	0	0	0	0	9	0	0	0	0	0	2	0	0	0	0	0	0	0	0	0	0	0	0	0	0	0
OTU_3196	Unassigned	Unassigned	Unassigned	Unassigned	Unassigned	Unassigned	Unassigned	437	35	1.13331e-05	0	0	0	0	35	0	0	0	0	0	0	0	0	0	0	0	0	0	0	0	0	0	0	0	0	0	0	0	0	0	0	0	0	0	0	0	0	0	0
OTU_3871	Unassigned	Unassigned	Unassigned	Unassigned	Unassigned	Unassigned	Unassigned	334	35	1.13331e-05	0	0	0	0	0	0	0	0	0	0	0	0	0	0	0	0	0	0	0	0	0	0	0	4	0	3	0	0	0	0	0	0	0	0	0	0	7	4	0
OTU_4129	Unassigned	Unassigned	Unassigned	Unassigned	Unassigned	Unassigned	Unassigned	340	35	1.13331e-05	0	0	0	0	0	0	0	6	0	0	20	0	0	0	0	0	0	0	0	0	0	0	0	0	0	0	0	0	0	0	0	0	0	0	0	0	0	0	0
OTU_7218	Unassigned	Unassigned	Unassigned	Unassigned	Unassigned	Unassigned	Unassigned	352	35	1.13331e-05	0	0	0	0	0	0	0	0	0	0	0	0	0	0	0	0	0	0	0	0	0	0	0	0	0	0	0	0	0	0	0	0	0	0	0	0	0	0	0
OTU_2015	Unassigned	Unassigned	Unassigned	Unassigned	Unassigned	Unassigned	Unassigned	345	34	1.10093e-05	0	0	0	0	0	0	0	0	0	0	0	0	0	0	0	0	0	0	0	0	0	0	0	7	0	0	0	0	13	0	0	0	0	0	0	0	0	0	0
OTU_2329	Unassigned	Unassigned	Unassigned	Unassigned	Unassigned	Unassigned	Unassigned	357	34	1.10093e-05	0	0	0	0	0	0	0	0	0	0	0	0	0	0	0	0	0	0	0	0	0	0	0	0	0	0	0	0	0	0	0	0	0	0	0	0	0	0	0
OTU_2601	Unassigned	Unassigned	Unassigned	Unassigned	Unassigned	Unassigned	Unassigned	287	34	1.10093e-05	0	0	0	0	0	0	10	0	0	0	0	0	0	0	0	0	1	0	0	0	0	0	0	0	0	1	0	0	0	0	0	0	0	0	0	2	1	0	0
OTU_3293	Unassigned	Unassigned	Unassigned	Unassigned	Unassigned	Unassigned	Unassigned	334	34	1.10093e-05	0	0	0	0	3	0	0	0	0	0	0	0	0	0	0	0	0	0	0	0	0	0	0	10	0	0	0	0	0	0	0	0	0	0	0	0	0	0	0
OTU_3393	Unassigned	Unassigned	Unassigned	Unassigned	Unassigned	Unassigned	Unassigned	356	34	1.10093e-05	0	0	0	0	7	0	0	0	0	0	0	0	0	0	0	0	0	0	0	0	0	0	0	4	0	0	0	0	0	0	0	0	0	0	0	0	1	15	0
OTU_3781	Unassigned	Unassigned	Unassigned	Unassigned	Unassigned	Unassigned	Unassigned	340	34	1.10093e-05	0	0	0	0	0	0	0	0	0	0	0	0	0	0	0	0	0	0	0	3	0	0	0	0	0	0	3	0	0	0	0	0	0	0	0	0	0	0	0
OTU_4580	Unassigned	Unassigned	Unassigned	Unassigned	Unassigned	Unassigned	Unassigned	419	34	1.10093e-05	0	0	0	0	0	0	0	0	0	0	0	0	0	0	0	0	0	0	0	0	0	0	0	18	0	0	0	0	0	0	0	0	0	0	0	0	0	0	0
OTU_5310	Unassigned	Unassigned	Unassigned	Unassigned	Unassigned	Unassigned	Unassigned	339	34	1.10093e-05	1	0	7	0	0	0	0	0	0	0	0	0	0	0	0	0	9	3	0	0	0	0	0	0	0	0	0	0	0	0	0	0	0	0	0	0	2	5	0
OTU_1619	Unassigned	Unassigned	Unassigned	Unassigned	Unassigned	Unassigned	Unassigned	342	33	1.06855e-05	0	0	0	0	0	0	0	0	0	0	0	0	0	0	0	0	0	0	0	0	0	0	0	0	0	0	0	0	0	0	0	0	0	0	0	0	0	0	33
OTU_2388	Unassigned	Unassigned	Unassigned	Unassigned	Unassigned	Unassigned	Unassigned	346	33	1.06855e-05	0	0	0	0	0	0	0	0	0	0	0	0	0	4	0	0	0	0	0	0	0	4	0	0	0	0	0	0	0	0	1	0	0	0	0	0	0	2	0
OTU_6834	Unassigned	Unassigned	Unassigned	Unassigned	Unassigned	Unassigned	Unassigned	343	33	1.06855e-05	0	0	0	0	1	0	0	0	0	0	0	0	0	0	0	0	1	0	0	0	0	0	0	7	0	0	4	0	0	0	0	0	0	3	0	0	1	0	0
OTU_1706	Unassigned	Unassigned	Unassigned	Unassigned	Unassigned	Unassigned	Unassigned	273	32	1.03617e-05	0	0	0	0	0	0	0	0	0	0	0	0	0	0	0	0	0	0	0	0	0	0	0	0	0	0	0	0	0	0	0	0	0	0	0	0	0	0	0
OTU_1770	Unassigned	Unassigned	Unassigned	Unassigned	Unassigned	Unassigned	Unassigned	332	32	1.03617e-05	0	0	0	0	0	0	0	0	0	0	0	0	0	0	0	0	0	0	0	0	0	0	0	0	0	0	0	0	0	0	0	0	0	0	0	0	0	3	0
OTU_1902	Unassigned	Unassigned	Unassigned	Unassigned	Unassigned	Unassigned	Unassigned	332	32	1.03617e-05	32	0	0	0	0	0	0	0	0	0	0	0	0	0	0	0	0	0	0	0	0	0	0	0	0	0	0	0	0	0	0	0	0	0	0	0	0	0	0
OTU_2151	Unassigned	Unassigned	Unassigned	Unassigned	Unassigned	Unassigned	Unassigned	351	32	1.03617e-05	0	0	0	0	3	0	0	0	0	0	0	0	0	0	0	0	0	0	0	0	0	0	0	6	0	0	6	0	1	0	0	0	0	0	0	3	4	2	0
OTU_2441	Unassigned	Unassigned	Unassigned	Unassigned	Unassigned	Unassigned	Unassigned	333	32	1.03617e-05	0	0	0	0	0	0	6	4	0	0	0	0	0	0	0	0	0	0	0	0	0	0	0	0	0	0	2	0	0	0	0	0	0	0	0	1	0	0	0
OTU_2508	Unassigned	Unassigned	Unassigned	Unassigned	Unassigned	Unassigned	Unassigned	315	32	1.03617e-05	0	0	0	1	0	0	0	0	0	0	6	0	0	0	0	0	0	2	0	0	0	0	0	0	0	0	0	0	0	0	0	0	0	0	0	0	0	0	0
OTU_2934	Unassigned	Unassigned	Unassigned	Unassigned	Unassigned	Unassigned	Unassigned	340	32	1.03617e-05	0	0	0	0	0	0	2	10	0	0	0	0	0	0	0	0	0	0	0	0	0	0	0	0	0	0	0	0	0	0	0	0	0	0	0	3	0	4	0
OTU_2938	Unassigned	Unassigned	Unassigned	Unassigned	Unassigned	Unassigned	Unassigned	346	32	1.03617e-05	0	0	0	0	0	0	0	0	0	0	0	0	0	0	0	0	0	0	0	0	0	0	0	0	0	0	0	0	0	0	3	0	0	0	0	5	0	0	0
OTU_3104	Unassigned	Unassigned	Unassigned	Unassigned	Unassigned	Unassigned	Unassigned	337	32	1.03617e-05	0	0	0	0	0	0	0	0	0	0	0	0	0	0	0	0	0	17	0	0	0	0	0	10	0	0	0	0	0	0	0	0	0	0	0	0	1	4	0
OTU_4183	Unassigned	Unassigned	Unassigned	Unassigned	Unassigned	Unassigned	Unassigned	341	32	1.03617e-05	0	0	0	0	0	0	0	0	0	0	0	0	0	0	0	0	0	0	0	0	0	0	0	0	0	0	0	0	0	0	0	0	0	0	0	0	0	0	0
OTU_4964	Unassigned	Unassigned	Unassigned	Unassigned	Unassigned	Unassigned	Unassigned	337	32	1.03617e-05	0	0	0	0	0	0	0	0	0	0	0	0	0	0	0	0	3	14	0	0	0	0	0	3	0	0	0	0	0	0	0	0	0	0	0	0	6	0	0
OTU_1733	Unassigned	Unassigned	Unassigned	Unassigned	Unassigned	Unassigned	Unassigned	358	31	1.00379e-05	0	0	0	0	0	0	0	0	0	0	0	0	0	0	0	0	0	30	0	0	0	0	0	0	0	0	0	0	0	0	0	0	0	0	0	0	0	0	0
OTU_1874	Unassigned	Unassigned	Unassigned	Unassigned	Unassigned	Unassigned	Unassigned	342	31	1.00379e-05	0	0	0	0	0	0	0	0	0	0	0	0	0	0	0	0	0	0	0	2	0	0	0	0	0	0	0	0	0	0	0	0	0	0	3	0	0	0	0
OTU_1908	Unassigned	Unassigned	Unassigned	Unassigned	Unassigned	Unassigned	Unassigned	315	31	1.00379e-05	0	0	0	0	0	0	0	0	0	0	21	0	0	0	0	0	0	0	0	0	0	0	0	0	0	0	0	0	0	0	0	0	0	0	0	0	2	0	0
OTU_2188	Unassigned	Unassigned	Unassigned	Unassigned	Unassigned	Unassigned	Unassigned	414	31	1.00379e-05	0	0	0	0	0	0	0	0	0	31	0	0	0	0	0	0	0	0	0	0	0	0	0	0	0	0	0	0	0	0	0	0	0	0	0	0	0	0	0
OTU_2357	Unassigned	Unassigned	Unassigned	Unassigned	Unassigned	Unassigned	Unassigned	332	31	1.00379e-05	0	0	0	0	0	0	0	0	0	0	0	0	0	0	0	0	0	0	0	0	0	0	0	0	0	0	0	0	0	0	0	0	0	0	0	0	0	0	0
OTU_2627	Unassigned	Unassigned	Unassigned	Unassigned	Unassigned	Unassigned	Unassigned	340	31	1.00379e-05	0	0	0	0	0	0	0	0	0	0	0	0	0	5	0	0	0	0	0	1	0	0	0	0	0	0	0	0	0	0	0	0	0	0	0	3	0	0	0
OTU_3262	Unassigned	Unassigned	Unassigned	Unassigned	Unassigned	Unassigned	Unassigned	320	31	1.00379e-05	0	0	6	4	2	0	1	0	0	0	0	0	0	0	0	0	0	0	0	0	0	0	0	3	0	3	1	0	0	0	0	0	0	0	0	0	0	0	0
OTU_3440	Unassigned	Unassigned	Unassigned	Unassigned	Unassigned	Unassigned	Unassigned	330	31	1.00379e-05	0	0	0	3	1	0	0	0	0	0	0	0	0	0	0	0	1	1	0	0	0	0	0	2	0	0	0	0	0	0	0	0	0	0	0	0	0	0	0
OTU_3502	Unassigned	Unassigned	Unassigned	Unassigned	Unassigned	Unassigned	Unassigned	357	31	1.00379e-05	0	0	0	0	0	0	0	0	0	0	0	0	0	0	0	0	0	0	0	0	13	0	0	0	0	0	0	0	0	0	0	0	0	0	0	9	0	0	0
OTU_4228	Unassigned	Unassigned	Unassigned	Unassigned	Unassigned	Unassigned	Unassigned	331	31	1.00379e-05	0	0	0	0	0	0	0	0	0	0	0	0	0	0	0	0	0	0	0	0	0	0	0	0	0	0	2	0	0	0	0	0	0	0	0	0	9	10	0
OTU_4392	Unassigned	Unassigned	Unassigned	Unassigned	Unassigned	Unassigned	Unassigned	432	31	1.00379e-05	0	0	0	0	5	0	0	0	0	0	0	0	0	0	0	0	0	5	0	0	0	0	0	0	0	0	0	0	0	0	0	0	0	0	0	0	0	0	0
OTU_2128	Unassigned	Unassigned	Unassigned	Unassigned	Unassigned	Unassigned	Unassigned	341	30	9.71412e-06	0	0	1	0	3	0	0	0	0	0	0	0	0	0	0	0	0	0	0	0	0	0	0	0	0	0	0	0	0	0	0	0	0	0	0	0	0	0	0
OTU_2432	Unassigned	Unassigned	Unassigned	Unassigned	Unassigned	Unassigned	Unassigned	337	30	9.71412e-06	0	0	0	0	0	0	0	0	0	0	0	0	0	0	0	0	0	0	0	0	0	0	0	0	0	0	0	0	0	0	0	0	0	0	0	0	0	0	0
OTU_2442	Unassigned	Unassigned	Unassigned	Unassigned	Unassigned	Unassigned	Unassigned	320	30	9.71412e-06	0	0	0	0	0	0	0	0	0	0	0	0	0	0	0	0	0	0	0	0	0	0	0	0	0	0	0	0	0	0	4	0	0	0	0	0	0	0	0
OTU_2539	Unassigned	Unassigned	Unassigned	Unassigned	Unassigned	Unassigned	Unassigned	421	30	9.71412e-06	0	0	0	0	0	0	0	0	0	0	0	0	0	0	0	0	0	0	0	0	0	0	0	7	0	0	0	0	0	0	0	0	0	0	0	0	0	7	0
OTU_3277	Unassigned	Unassigned	Unassigned	Unassigned	Unassigned	Unassigned	Unassigned	331	30	9.71412e-06	0	0	1	0	0	0	0	0	0	0	0	0	0	5	0	0	0	0	0	0	0	0	0	0	0	0	1	0	0	0	0	0	0	0	0	0	0	0	0
OTU_4307	Unassigned	Unassigned	Unassigned	Unassigned	Unassigned	Unassigned	Unassigned	335	30	9.71412e-06	0	0	0	0	0	0	0	0	13	0	0	0	0	0	0	0	0	0	0	0	0	0	0	0	0	0	0	0	0	0	0	0	0	0	0	0	0	0	0
OTU_6560	Unassigned	Unassigned	Unassigned	Unassigned	Unassigned	Unassigned	Unassigned	341	30	9.71412e-06	0	0	0	0	0	0	0	0	0	0	0	0	0	0	0	0	0	0	0	0	0	0	0	0	0	0	0	0	0	0	0	0	0	0	5	18	0	0	5
OTU_7711	Unassigned	Unassigned	Unassigned	Unassigned	Unassigned	Unassigned	Unassigned	290	30	9.71412e-06	0	0	0	0	0	0	0	0	0	0	0	0	0	0	0	0	3	0	0	0	0	0	0	0	0	0	0	0	0	0	0	0	0	0	0	0	7	0	0
OTU_1775	Unassigned	Unassigned	Unassigned	Unassigned	Unassigned	Unassigned	Unassigned	344	29	9.39032e-06	0	0	0	0	0	0	0	0	0	0	0	0	0	0	25	0	0	0	0	0	0	0	0	0	0	0	0	0	0	0	0	0	0	0	0	0	0	0	0
OTU_1995	Unassigned	Unassigned	Unassigned	Unassigned	Unassigned	Unassigned	Unassigned	343	29	9.39032e-06	0	0	0	0	0	0	0	0	0	0	0	0	0	0	0	0	0	0	0	0	0	0	0	0	0	0	0	0	0	0	0	0	0	0	0	0	7	0	0
OTU_2130	Unassigned	Unassigned	Unassigned	Unassigned	Unassigned	Unassigned	Unassigned	422	29	9.39032e-06	0	0	0	0	0	0	0	0	0	0	0	0	0	0	0	0	0	0	0	0	0	0	0	0	3	0	0	0	0	0	0	0	0	0	0	0	0	0	0
OTU_2688	Unassigned	Unassigned	Unassigned	Unassigned	Unassigned	Unassigned	Unassigned	354	29	9.39032e-06	0	0	0	0	0	0	0	0	0	0	0	0	0	2	0	0	0	0	0	0	0	0	0	0	0	0	0	0	0	0	13	0	0	0	0	0	0	0	0
OTU_2811	Unassigned	Unassigned	Unassigned	Unassigned	Unassigned	Unassigned	Unassigned	352	29	9.39032e-06	0	0	0	0	0	0	0	0	0	0	0	0	0	0	0	0	0	0	0	0	0	0	0	0	0	0	0	0	0	0	0	0	0	0	0	9	0	0	0
OTU_3568	Unassigned	Unassigned	Unassigned	Unassigned	Unassigned	Unassigned	Unassigned	413	29	9.39032e-06	0	0	2	0	24	0	0	0	0	0	0	0	0	0	0	0	0	0	0	0	0	0	0	0	0	0	0	0	0	0	0	0	0	0	0	0	0	3	0
OTU_4074	Unassigned	Unassigned	Unassigned	Unassigned	Unassigned	Unassigned	Unassigned	326	29	9.39032e-06	0	0	0	0	0	0	0	0	0	0	0	0	0	0	0	0	0	0	0	0	0	0	0	0	0	0	0	0	0	0	0	0	0	0	0	0	0	0	0
OTU_5508	Unassigned	Unassigned	Unassigned	Unassigned	Unassigned	Unassigned	Unassigned	333	29	9.39032e-06	0	0	6	0	0	0	0	0	0	0	0	0	0	0	0	0	0	0	0	0	0	0	0	1	1	0	1	0	0	0	0	2	0	3	0	0	0	0	0
OTU_1582	Unassigned	Unassigned	Unassigned	Unassigned	Unassigned	Unassigned	Unassigned	332	28	9.06651e-06	0	0	0	0	0	0	0	0	0	0	0	0	0	0	0	0	0	0	0	0	0	0	0	0	0	0	0	0	0	0	0	0	0	0	0	0	0	0	0
OTU_2117	Unassigned	Unassigned	Unassigned	Unassigned	Unassigned	Unassigned	Unassigned	345	28	9.06651e-06	0	0	0	0	0	0	0	0	0	0	0	0	0	0	0	0	0	0	0	0	0	0	0	0	0	0	0	0	0	0	0	0	0	0	0	0	0	0	0
OTU_2145	Unassigned	Unassigned	Unassigned	Unassigned	Unassigned	Unassigned	Unassigned	331	28	9.06651e-06	0	0	0	0	0	0	0	0	0	0	0	0	0	0	0	0	0	0	0	0	12	0	7	0	0	0	0	0	0	0	0	0	0	0	2	0	0	0	0
OTU_2259	Unassigned	Unassigned	Unassigned	Unassigned	Unassigned	Unassigned	Unassigned	374	28	9.06651e-06	0	0	0	0	0	0	0	0	0	0	0	0	0	0	21	0	0	0	0	0	0	0	0	0	0	0	0	0	0	0	0	0	0	0	0	0	0	0	0
OTU_2421	Unassigned	Unassigned	Unassigned	Unassigned	Unassigned	Unassigned	Unassigned	405	28	9.06651e-06	0	0	0	0	0	0	0	0	0	0	0	0	0	0	0	0	0	0	0	0	0	0	0	0	0	0	0	0	0	0	0	0	0	0	0	0	5	2	0
OTU_2427	Unassigned	Unassigned	Unassigned	Unassigned	Unassigned	Unassigned	Unassigned	340	28	9.06651e-06	2	0	0	0	0	0	6	0	0	0	0	0	0	0	0	0	0	0	0	0	3	0	0	0	0	0	0	0	0	0	0	0	0	0	0	0	0	0	0
OTU_2436	Unassigned	Unassigned	Unassigned	Unassigned	Unassigned	Unassigned	Unassigned	335	28	9.06651e-06	0	0	0	0	0	0	0	0	0	0	0	0	0	0	0	0	0	0	0	0	0	0	2	6	0	0	2	0	0	0	0	0	0	0	0	0	8	1	0
OTU_2511	Unassigned	Unassigned	Unassigned	Unassigned	Unassigned	Unassigned	Unassigned	321	28	9.06651e-06	0	0	0	0	0	0	12	0	0	0	0	0	0	0	0	0	0	0	0	0	0	0	0	0	0	0	16	0	0	0	0	0	0	0	0	0	0	0	0
OTU_2951	Unassigned	Unassigned	Unassigned	Unassigned	Unassigned	Unassigned	Unassigned	333	28	9.06651e-06	0	0	4	0	8	0	0	0	0	0	0	0	0	0	0	0	0	0	0	0	0	0	0	3	3	0	0	0	0	0	0	0	0	0	0	0	0	1	0
OTU_3146	Unassigned	Unassigned	Unassigned	Unassigned	Unassigned	Unassigned	Unassigned	429	28	9.06651e-06	0	0	0	0	0	0	0	0	0	0	0	0	0	0	0	0	0	0	0	0	0	0	0	0	0	0	0	0	0	0	0	0	0	0	0	0	0	0	0
OTU_3579	Unassigned	Unassigned	Unassigned	Unassigned	Unassigned	Unassigned	Unassigned	342	28	9.06651e-06	4	0	0	0	0	0	0	0	0	0	0	0	0	0	0	0	0	0	0	0	0	0	0	0	0	0	0	0	0	0	0	0	0	0	7	0	0	3	1
OTU_4087	Unassigned	Unassigned	Unassigned	Unassigned	Unassigned	Unassigned	Unassigned	334	28	9.06651e-06	0	0	0	0	6	0	0	0	0	0	0	0	0	0	0	0	0	0	0	0	0	0	0	4	0	0	0	0	4	0	0	0	0	0	0	0	0	0	0
OTU_5016	Unassigned	Unassigned	Unassigned	Unassigned	Unassigned	Unassigned	Unassigned	396	28	9.06651e-06	0	5	0	0	0	0	0	0	0	0	0	0	0	0	0	0	0	0	0	0	0	0	7	0	0	0	1	0	0	0	0	0	0	2	0	0	5	0	0
OTU_1928	Unassigned	Unassigned	Unassigned	Unassigned	Unassigned	Unassigned	Unassigned	373	27	8.74271e-06	0	0	0	0	0	0	0	0	0	0	0	0	0	0	0	0	0	0	0	0	0	0	0	0	0	0	0	0	0	0	0	27	0	0	0	0	0	0	0
OTU_1991	Unassigned	Unassigned	Unassigned	Unassigned	Unassigned	Unassigned	Unassigned	363	27	8.74271e-06	0	0	0	0	0	0	0	0	0	12	0	4	0	0	0	0	0	0	0	0	0	0	0	0	0	0	0	0	0	0	0	0	0	0	0	0	0	0	0
OTU_2046	Unassigned	Unassigned	Unassigned	Unassigned	Unassigned	Unassigned	Unassigned	347	27	8.74271e-06	0	0	1	0	0	0	0	0	0	0	0	0	0	0	0	0	0	0	0	0	0	0	1	0	0	0	0	0	0	0	0	1	0	0	0	0	1	0	0
OTU_2211	Unassigned	Unassigned	Unassigned	Unassigned	Unassigned	Unassigned	Unassigned	333	27	8.74271e-06	0	0	0	0	0	0	0	0	0	0	0	0	0	0	0	0	0	0	0	0	0	0	0	0	0	0	0	0	0	0	0	0	0	0	0	0	0	0	0
OTU_2495	Unassigned	Unassigned	Unassigned	Unassigned	Unassigned	Unassigned	Unassigned	339	27	8.74271e-06	0	0	0	0	0	0	0	0	0	0	0	0	0	0	0	0	0	0	0	0	2	0	0	0	0	0	8	0	0	0	0	0	0	0	0	0	0	0	1
OTU_2571	Unassigned	Unassigned	Unassigned	Unassigned	Unassigned	Unassigned	Unassigned	339	27	8.74271e-06	0	0	0	0	0	0	0	0	0	0	0	0	0	0	0	0	0	27	0	0	0	0	0	0	0	0	0	0	0	0	0	0	0	0	0	0	0	0	0
OTU_2642	Unassigned	Unassigned	Unassigned	Unassigned	Unassigned	Unassigned	Unassigned	359	27	8.74271e-06	0	0	0	0	0	0	0	0	0	0	0	0	0	0	0	0	0	0	0	0	0	0	0	0	0	0	0	0	0	0	0	0	0	0	0	0	0	0	0
OTU_2836	Unassigned	Unassigned	Unassigned	Unassigned	Unassigned	Unassigned	Unassigned	335	27	8.74271e-06	0	0	0	0	0	0	0	0	0	0	0	0	0	0	0	0	0	0	0	0	0	0	0	0	0	0	0	0	0	0	0	0	0	0	0	0	0	0	0
OTU_4007	Unassigned	Unassigned	Unassigned	Unassigned	Unassigned	Unassigned	Unassigned	343	27	8.74271e-06	0	0	0	0	0	0	0	0	0	0	0	0	0	0	0	0	0	4	0	0	0	0	0	0	0	0	0	0	0	0	0	0	0	0	0	0	0	0	0
OTU_4427	Unassigned	Unassigned	Unassigned	Unassigned	Unassigned	Unassigned	Unassigned	331	27	8.74271e-06	0	0	0	0	0	0	2	0	0	0	4	0	0	0	0	0	0	0	0	0	0	0	0	0	0	0	0	0	0	0	0	0	0	0	0	0	0	0	0
OTU_5042	Unassigned	Unassigned	Unassigned	Unassigned	Unassigned	Unassigned	Unassigned	403	27	8.74271e-06	0	0	0	0	0	0	0	0	27	0	0	0	0	0	0	0	0	0	0	0	0	0	0	0	0	0	0	0	0	0	0	0	0	0	0	0	0	0	0
OTU_6653	Unassigned	Unassigned	Unassigned	Unassigned	Unassigned	Unassigned	Unassigned	338	27	8.74271e-06	0	0	10	0	6	0	0	0	0	0	0	0	0	0	0	0	1	0	0	0	0	0	0	2	0	0	3	0	0	0	0	0	0	0	0	0	0	0	0
OTU_7480	Unassigned	Unassigned	Unassigned	Unassigned	Unassigned	Unassigned	Unassigned	461	27	8.74271e-06	0	0	0	0	0	0	0	1	0	0	21	0	0	0	0	0	0	0	0	0	0	0	0	0	0	0	0	0	0	0	0	0	0	0	5	0	0	0	0
OTU_2098	Unassigned	Unassigned	Unassigned	Unassigned	Unassigned	Unassigned	Unassigned	335	26	8.4189e-06	0	0	0	0	0	0	0	0	0	0	0	0	0	0	26	0	0	0	0	0	0	0	0	0	0	0	0	0	0	0	0	0	0	0	0	0	0	0	0
OTU_2163	Unassigned	Unassigned	Unassigned	Unassigned	Unassigned	Unassigned	Unassigned	358	26	8.4189e-06	0	0	0	1	1	0	0	0	0	0	0	0	0	0	0	0	4	14	0	0	0	0	0	6	0	0	0	0	0	0	0	0	0	0	0	0	0	0	0
OTU_2187	Unassigned	Unassigned	Unassigned	Unassigned	Unassigned	Unassigned	Unassigned	338	26	8.4189e-06	0	0	0	0	0	0	0	0	0	0	0	0	0	0	0	0	0	0	0	0	0	0	6	0	0	0	0	0	0	0	0	0	0	0	0	0	0	0	0
OTU_2249	Unassigned	Unassigned	Unassigned	Unassigned	Unassigned	Unassigned	Unassigned	331	26	8.4189e-06	0	0	0	0	0	0	0	0	0	0	0	0	0	0	0	0	0	0	0	0	0	0	0	0	0	0	0	0	0	0	0	0	0	0	0	0	0	0	0
OTU_2391	Unassigned	Unassigned	Unassigned	Unassigned	Unassigned	Unassigned	Unassigned	308	26	8.4189e-06	0	0	0	0	0	0	0	0	0	0	0	0	0	0	0	0	0	0	0	0	0	0	2	0	0	0	0	0	0	0	0	0	0	0	0	0	0	0	0
OTU_2422	Unassigned	Unassigned	Unassigned	Unassigned	Unassigned	Unassigned	Unassigned	388	26	8.4189e-06	0	0	0	0	0	1	0	0	0	0	0	0	0	0	0	0	0	5	0	0	0	0	0	0	0	0	0	3	0	0	0	0	0	0	0	0	0	0	0
OTU_2451	Unassigned	Unassigned	Unassigned	Unassigned	Unassigned	Unassigned	Unassigned	344	26	8.4189e-06	0	0	0	0	0	0	0	0	0	0	0	0	0	0	0	0	0	0	0	0	0	0	0	0	0	0	0	0	0	0	0	0	0	0	0	0	0	0	0
OTU_2507	Unassigned	Unassigned	Unassigned	Unassigned	Unassigned	Unassigned	Unassigned	339	26	8.4189e-06	0	0	0	0	0	0	0	0	0	0	0	0	0	0	0	0	0	4	0	0	0	0	0	1	0	0	0	0	0	0	0	0	0	0	0	0	0	0	0
OTU_3730	Unassigned	Unassigned	Unassigned	Unassigned	Unassigned	Unassigned	Unassigned	422	26	8.4189e-06	0	0	0	4	0	0	0	0	0	0	0	0	0	3	0	0	8	0	0	0	0	0	0	2	0	0	7	0	0	0	0	0	0	0	0	0	0	0	0
OTU_3950	Unassigned	Unassigned	Unassigned	Unassigned	Unassigned	Unassigned	Unassigned	352	26	8.4189e-06	0	0	0	0	0	0	0	0	0	0	0	0	0	0	0	0	5	0	0	0	0	0	0	3	0	0	0	0	0	0	0	0	0	0	0	0	0	0	0
OTU_5513	Unassigned	Unassigned	Unassigned	Unassigned	Unassigned	Unassigned	Unassigned	433	26	8.4189e-06	0	0	0	0	0	0	0	0	0	0	0	0	0	0	0	0	0	0	0	0	0	0	4	0	0	0	0	0	0	0	0	0	0	0	0	0	0	0	0
OTU_6659	Unassigned	Unassigned	Unassigned	Unassigned	Unassigned	Unassigned	Unassigned	346	26	8.4189e-06	0	0	0	0	0	0	0	0	0	0	0	0	0	0	0	0	0	0	0	0	0	0	0	0	0	0	0	0	0	0	0	4	0	0	0	0	3	0	3
OTU_2237	Unassigned	Unassigned	Unassigned	Unassigned	Unassigned	Unassigned	Unassigned	313	25	8.0951e-06	25	0	0	0	0	0	0	0	0	0	0	0	0	0	0	0	0	0	0	0	0	0	0	0	0	0	0	0	0	0	0	0	0	0	0	0	0	0	0
OTU_2348	Unassigned	Unassigned	Unassigned	Unassigned	Unassigned	Unassigned	Unassigned	347	25	8.0951e-06	0	0	0	0	0	0	0	0	0	0	0	0	0	0	0	0	0	0	0	0	0	0	0	0	0	1	0	0	0	0	0	0	0	0	3	10	0	0	0
OTU_2382	Unassigned	Unassigned	Unassigned	Unassigned	Unassigned	Unassigned	Unassigned	315	25	8.0951e-06	0	0	0	3	0	0	0	0	0	0	0	0	0	0	0	0	0	0	0	0	0	0	11	0	0	0	0	0	2	0	0	0	0	0	0	0	0	0	3
OTU_2614	Unassigned	Unassigned	Unassigned	Unassigned	Unassigned	Unassigned	Unassigned	343	25	8.0951e-06	0	0	2	0	17	0	0	0	0	0	0	0	0	0	0	0	0	0	0	0	0	0	0	2	0	0	0	0	2	0	0	0	0	0	0	0	0	0	0
OTU_2745	Unassigned	Unassigned	Unassigned	Unassigned	Unassigned	Unassigned	Unassigned	349	25	8.0951e-06	0	0	0	0	0	0	0	0	0	0	0	0	0	0	0	0	0	2	0	0	0	0	0	0	0	0	0	0	0	0	0	0	0	0	0	0	0	3	0
OTU_3115	Unassigned	Unassigned	Unassigned	Unassigned	Unassigned	Unassigned	Unassigned	359	25	8.0951e-06	0	0	0	0	0	0	0	0	0	0	0	0	0	0	0	0	0	0	0	0	0	0	0	0	0	0	0	0	0	0	0	0	0	0	0	0	0	0	0
OTU_3463	Unassigned	Unassigned	Unassigned	Unassigned	Unassigned	Unassigned	Unassigned	346	25	8.0951e-06	0	0	0	0	0	0	0	0	0	0	0	0	0	0	5	0	0	0	0	0	0	0	0	0	0	0	0	0	0	0	0	0	0	0	0	0	0	0	0
OTU_3515	Unassigned	Unassigned	Unassigned	Unassigned	Unassigned	Unassigned	Unassigned	340	25	8.0951e-06	0	0	0	0	0	0	0	0	0	4	0	0	0	0	0	0	0	0	0	0	0	0	0	0	0	0	0	0	0	0	0	0	0	0	0	0	0	0	0
OTU_4088	Unassigned	Unassigned	Unassigned	Unassigned	Unassigned	Unassigned	Unassigned	403	25	8.0951e-06	0	0	0	0	0	0	0	0	0	0	0	0	0	0	0	0	0	2	0	0	0	0	0	0	0	0	0	0	0	0	0	0	0	0	0	0	0	0	0
OTU_4383	Unassigned	Unassigned	Unassigned	Unassigned	Unassigned	Unassigned	Unassigned	354	25	8.0951e-06	0	0	0	0	0	0	0	0	0	0	0	0	0	0	0	0	0	0	0	0	0	0	0	0	0	0	0	0	0	0	0	0	0	0	0	0	0	0	0
OTU_6998	Unassigned	Unassigned	Unassigned	Unassigned	Unassigned	Unassigned	Unassigned	341	25	8.0951e-06	0	0	0	0	0	0	0	0	0	0	0	0	0	0	0	0	0	13	0	0	0	0	0	1	0	0	0	0	0	0	1	0	0	0	0	0	1	6	0
OTU_1769	Unassigned	Unassigned	Unassigned	Unassigned	Unassigned	Unassigned	Unassigned	357	24	7.7713e-06	0	0	0	0	0	0	0	0	0	0	0	0	0	0	0	0	0	0	0	0	9	0	12	0	0	0	0	0	0	0	0	3	0	0	0	0	0	0	0
OTU_1892	Unassigned	Unassigned	Unassigned	Unassigned	Unassigned	Unassigned	Unassigned	341	24	7.7713e-06	0	0	0	0	0	0	0	0	0	0	0	0	0	0	0	0	0	0	0	0	0	0	0	0	0	0	0	0	0	0	0	0	0	0	0	0	0	0	0
OTU_2025	Unassigned	Unassigned	Unassigned	Unassigned	Unassigned	Unassigned	Unassigned	340	24	7.7713e-06	0	0	0	0	0	0	0	0	0	0	0	0	0	0	0	0	0	0	0	0	0	0	0	0	0	0	0	0	0	0	0	0	0	0	0	0	0	0	0
OTU_2133	Unassigned	Unassigned	Unassigned	Unassigned	Unassigned	Unassigned	Unassigned	328	24	7.7713e-06	0	0	0	0	3	0	0	0	0	0	0	0	0	0	0	0	0	0	0	0	0	0	0	0	0	0	0	0	0	0	0	21	0	0	0	0	0	0	0
OTU_2137	Unassigned	Unassigned	Unassigned	Unassigned	Unassigned	Unassigned	Unassigned	383	24	7.7713e-06	0	0	0	0	0	0	0	0	0	0	0	0	24	0	0	0	0	0	0	0	0	0	0	0	0	0	0	0	0	0	0	0	0	0	0	0	0	0	0
OTU_2236	Unassigned	Unassigned	Unassigned	Unassigned	Unassigned	Unassigned	Unassigned	383	24	7.7713e-06	0	0	0	0	0	0	0	0	0	10	0	0	0	0	0	0	0	0	0	0	0	0	0	0	0	0	0	0	0	0	0	0	0	0	0	0	0	0	0
OTU_2300	Unassigned	Unassigned	Unassigned	Unassigned	Unassigned	Unassigned	Unassigned	357	24	7.7713e-06	0	0	0	0	6	0	0	0	0	0	0	0	0	0	0	0	0	0	0	0	0	0	0	0	0	0	0	0	0	0	0	0	0	0	0	11	0	0	0
OTU_2301	Unassigned	Unassigned	Unassigned	Unassigned	Unassigned	Unassigned	Unassigned	338	24	7.7713e-06	24	0	0	0	0	0	0	0	0	0	0	0	0	0	0	0	0	0	0	0	0	0	0	0	0	0	0	0	0	0	0	0	0	0	0	0	0	0	0
OTU_2719	Unassigned	Unassigned	Unassigned	Unassigned	Unassigned	Unassigned	Unassigned	402	24	7.7713e-06	0	0	0	0	0	0	0	0	0	0	0	0	0	0	0	0	0	0	0	0	0	0	0	17	0	0	0	0	0	0	0	0	0	0	0	0	0	0	0
OTU_2818	Unassigned	Unassigned	Unassigned	Unassigned	Unassigned	Unassigned	Unassigned	352	24	7.7713e-06	0	0	0	0	0	0	0	6	0	0	0	0	0	0	0	0	0	0	0	0	0	0	0	0	0	0	0	0	0	0	0	0	0	0	8	0	0	0	0
OTU_3042	Unassigned	Unassigned	Unassigned	Unassigned	Unassigned	Unassigned	Unassigned	291	24	7.7713e-06	0	0	0	0	0	0	0	0	0	0	0	0	0	0	0	0	0	0	0	0	0	0	0	0	0	0	0	0	0	0	0	0	0	0	0	0	0	0	0
OTU_3129	Unassigned	Unassigned	Unassigned	Unassigned	Unassigned	Unassigned	Unassigned	366	24	7.7713e-06	0	0	0	0	0	0	0	0	0	0	0	0	0	3	0	0	2	0	0	0	0	0	0	0	0	0	0	0	0	0	0	0	0	0	0	0	5	0	0
OTU_3165	Unassigned	Unassigned	Unassigned	Unassigned	Unassigned	Unassigned	Unassigned	346	24	7.7713e-06	0	0	0	0	0	0	0	0	0	0	0	0	0	0	0	0	0	0	0	0	0	0	0	0	0	0	0	0	1	0	0	0	0	0	0	0	0	0	0
OTU_3425	Unassigned	Unassigned	Unassigned	Unassigned	Unassigned	Unassigned	Unassigned	333	24	7.7713e-06	4	0	0	6	0	0	0	0	0	0	0	0	0	0	0	0	0	0	0	0	0	0	0	0	0	0	0	0	0	0	0	0	0	0	0	0	2	0	0
OTU_4103	Unassigned	Unassigned	Unassigned	Unassigned	Unassigned	Unassigned	Unassigned	346	24	7.7713e-06	0	0	0	0	1	0	0	0	0	0	0	0	0	0	0	0	6	0	0	0	0	0	0	3	0	0	0	0	0	0	0	0	0	0	0	0	0	0	0
OTU_4176	Unassigned	Unassigned	Unassigned	Unassigned	Unassigned	Unassigned	Unassigned	353	24	7.7713e-06	0	0	0	0	1	0	0	0	0	0	0	0	0	0	0	0	0	0	0	0	0	0	0	0	0	0	0	0	0	0	0	0	0	0	0	0	0	0	0
OTU_4425	Unassigned	Unassigned	Unassigned	Unassigned	Unassigned	Unassigned	Unassigned	344	24	7.7713e-06	0	0	2	0	0	0	0	0	0	0	0	0	0	0	0	0	0	0	0	0	0	0	0	0	0	0	0	0	0	0	0	0	0	0	0	0	0	0	0
OTU_4497	Unassigned	Unassigned	Unassigned	Unassigned	Unassigned	Unassigned	Unassigned	341	24	7.7713e-06	5	0	3	0	0	0	0	0	0	0	0	0	0	0	0	0	0	0	0	0	0	0	0	0	0	0	1	0	0	0	0	0	0	0	0	0	0	0	0
OTU_5188	Unassigned	Unassigned	Unassigned	Unassigned	Unassigned	Unassigned	Unassigned	345	24	7.7713e-06	0	0	0	0	0	0	0	0	0	0	0	0	0	0	0	0	0	9	0	0	0	0	0	0	0	0	0	0	0	0	0	0	0	0	0	0	1	2	0
OTU_5995	Unassigned	Unassigned	Unassigned	Unassigned	Unassigned	Unassigned	Unassigned	450	24	7.7713e-06	0	0	0	0	0	0	0	24	0	0	0	0	0	0	0	0	0	0	0	0	0	0	0	0	0	0	0	0	0	0	0	0	0	0	0	0	0	0	0
OTU_1853	Unassigned	Unassigned	Unassigned	Unassigned	Unassigned	Unassigned	Unassigned	347	23	7.44749e-06	0	0	0	0	0	0	0	0	0	0	0	0	0	0	1	0	0	0	0	0	0	0	0	0	0	0	0	0	0	0	0	0	0	0	15	0	0	0	0
OTU_1917	Unassigned	Unassigned	Unassigned	Unassigned	Unassigned	Unassigned	Unassigned	347	23	7.44749e-06	0	0	0	0	0	0	0	0	0	0	0	0	0	0	0	0	0	0	0	0	0	0	0	0	0	0	0	0	0	0	0	0	0	0	0	0	0	0	0
OTU_1953	Unassigned	Unassigned	Unassigned	Unassigned	Unassigned	Unassigned	Unassigned	334	23	7.44749e-06	0	0	0	0	0	0	0	0	0	0	0	0	0	0	0	0	0	0	0	23	0	0	0	0	0	0	0	0	0	0	0	0	0	0	0	0	0	0	0
OTU_2370	Unassigned	Unassigned	Unassigned	Unassigned	Unassigned	Unassigned	Unassigned	334	23	7.44749e-06	0	0	0	0	0	0	0	0	0	0	0	0	0	0	5	0	0	2	0	0	0	0	0	3	0	0	0	0	0	0	0	0	0	0	0	0	0	4	0
OTU_2405	Unassigned	Unassigned	Unassigned	Unassigned	Unassigned	Unassigned	Unassigned	342	23	7.44749e-06	0	0	0	0	0	0	0	0	0	0	0	0	0	0	0	0	0	0	0	0	0	0	1	0	0	0	0	0	0	0	0	0	0	0	0	0	0	0	0
OTU_2500	Unassigned	Unassigned	Unassigned	Unassigned	Unassigned	Unassigned	Unassigned	390	23	7.44749e-06	0	0	0	0	0	0	0	0	0	0	0	0	0	0	0	0	0	0	0	0	0	0	0	0	0	0	0	0	0	0	0	0	0	0	23	0	0	0	0
OTU_2552	Unassigned	Unassigned	Unassigned	Unassigned	Unassigned	Unassigned	Unassigned	339	23	7.44749e-06	0	0	0	0	0	0	0	0	0	0	0	0	0	0	0	0	0	0	0	0	6	0	0	0	0	0	0	0	0	0	0	0	0	0	6	0	0	0	0
OTU_2573	Unassigned	Unassigned	Unassigned	Unassigned	Unassigned	Unassigned	Unassigned	409	23	7.44749e-06	0	0	4	0	0	0	0	0	0	0	0	0	0	0	0	0	0	0	0	0	0	0	0	2	0	0	0	0	0	0	0	0	0	0	0	0	0	0	0
OTU_3049	Unassigned	Unassigned	Unassigned	Unassigned	Unassigned	Unassigned	Unassigned	338	23	7.44749e-06	0	0	0	0	0	0	0	0	0	0	0	0	0	0	0	0	0	0	0	0	0	0	0	0	0	0	0	0	0	0	0	0	0	0	0	13	4	0	0
OTU_3542	Unassigned	Unassigned	Unassigned	Unassigned	Unassigned	Unassigned	Unassigned	361	23	7.44749e-06	0	0	0	0	0	0	0	0	0	0	0	0	0	0	0	0	0	0	0	0	0	0	6	0	0	0	2	0	0	0	0	0	0	0	0	0	0	1	0
OTU_3634	Unassigned	Unassigned	Unassigned	Unassigned	Unassigned	Unassigned	Unassigned	402	23	7.44749e-06	0	0	0	0	3	0	0	0	0	0	0	0	0	0	0	0	0	0	0	0	0	0	0	0	0	0	0	0	0	0	0	0	0	0	0	4	0	0	0
OTU_4005	Unassigned	Unassigned	Unassigned	Unassigned	Unassigned	Unassigned	Unassigned	433	23	7.44749e-06	0	0	0	0	0	0	0	0	0	0	0	0	0	0	0	0	0	0	0	0	0	0	0	0	0	0	0	0	0	0	0	0	0	0	0	0	0	0	0
OTU_4779	Unassigned	Unassigned	Unassigned	Unassigned	Unassigned	Unassigned	Unassigned	344	23	7.44749e-06	0	0	0	0	0	0	0	0	0	0	0	0	0	0	0	0	0	0	0	0	0	0	0	2	0	0	0	0	0	0	0	0	0	0	0	0	15	0	0
OTU_5224	Unassigned	Unassigned	Unassigned	Unassigned	Unassigned	Unassigned	Unassigned	331	23	7.44749e-06	0	0	0	0	0	0	0	0	0	0	0	0	0	0	0	0	0	0	0	0	5	0	0	0	0	0	0	0	0	0	0	0	0	0	0	3	0	0	3
OTU_5840	Unassigned	Unassigned	Unassigned	Unassigned	Unassigned	Unassigned	Unassigned	421	23	7.44749e-06	0	0	0	0	0	0	0	0	0	0	0	0	0	0	0	0	0	0	0	0	0	0	0	0	0	0	0	0	0	0	0	0	0	0	0	0	0	0	0
OTU_6141	Unassigned	Unassigned	Unassigned	Unassigned	Unassigned	Unassigned	Unassigned	354	23	7.44749e-06	0	0	0	0	0	0	0	0	0	0	0	0	0	0	0	0	0	0	0	0	0	0	0	0	0	0	0	0	0	0	0	0	0	0	0	0	0	0	5
OTU_1910	Unassigned	Unassigned	Unassigned	Unassigned	Unassigned	Unassigned	Unassigned	370	22	7.12369e-06	0	0	0	0	0	0	0	0	0	0	0	0	0	0	0	0	0	0	0	0	0	0	0	0	0	0	0	0	0	0	22	0	0	0	0	0	0	0	0
OTU_2060	Unassigned	Unassigned	Unassigned	Unassigned	Unassigned	Unassigned	Unassigned	343	22	7.12369e-06	0	0	0	0	0	0	0	0	0	0	0	0	0	0	0	0	0	0	0	0	0	0	0	0	0	0	0	0	0	0	0	0	0	0	0	0	0	0	0
OTU_2299	Unassigned	Unassigned	Unassigned	Unassigned	Unassigned	Unassigned	Unassigned	330	22	7.12369e-06	0	0	0	0	0	0	0	0	22	0	0	0	0	0	0	0	0	0	0	0	0	0	0	0	0	0	0	0	0	0	0	0	0	0	0	0	0	0	0
OTU_2404	Unassigned	Unassigned	Unassigned	Unassigned	Unassigned	Unassigned	Unassigned	390	22	7.12369e-06	0	0	0	0	0	0	0	0	0	0	0	0	0	0	0	0	0	0	0	0	0	0	0	0	0	0	0	0	0	0	0	0	0	0	22	0	0	0	0
OTU_2786	Unassigned	Unassigned	Unassigned	Unassigned	Unassigned	Unassigned	Unassigned	344	22	7.12369e-06	2	0	0	0	0	0	0	0	0	0	0	0	0	0	0	0	0	0	0	0	0	0	0	0	0	0	0	0	0	0	0	0	0	0	0	0	0	0	0
OTU_3097	Unassigned	Unassigned	Unassigned	Unassigned	Unassigned	Unassigned	Unassigned	333	22	7.12369e-06	0	0	0	0	0	0	0	0	0	0	18	0	0	0	0	0	0	0	0	0	2	0	0	0	0	0	2	0	0	0	0	0	0	0	0	0	0	0	0
OTU_3806	Unassigned	Unassigned	Unassigned	Unassigned	Unassigned	Unassigned	Unassigned	343	22	7.12369e-06	0	0	0	0	0	0	0	0	0	0	0	0	0	0	0	0	0	0	0	0	0	0	0	0	0	0	1	0	0	0	0	0	0	0	0	0	0	0	0
OTU_3990	Unassigned	Unassigned	Unassigned	Unassigned	Unassigned	Unassigned	Unassigned	339	22	7.12369e-06	0	0	2	7	0	0	0	0	0	0	0	0	0	0	0	0	4	0	0	0	0	0	0	0	0	0	0	0	0	0	0	1	0	0	0	0	0	0	0
OTU_4430	Unassigned	Unassigned	Unassigned	Unassigned	Unassigned	Unassigned	Unassigned	424	22	7.12369e-06	0	0	0	0	0	0	0	0	0	0	0	0	0	0	0	0	0	0	0	0	0	0	0	0	0	0	0	0	0	0	0	0	0	0	0	0	6	0	0
OTU_4521	Unassigned	Unassigned	Unassigned	Unassigned	Unassigned	Unassigned	Unassigned	387	22	7.12369e-06	0	0	0	0	4	0	0	0	0	0	0	0	0	0	0	0	0	0	0	0	0	0	0	4	0	0	0	0	0	0	0	0	0	0	0	0	5	0	0
OTU_4616	Unassigned	Unassigned	Unassigned	Unassigned	Unassigned	Unassigned	Unassigned	339	22	7.12369e-06	0	0	0	0	0	0	0	0	12	0	1	0	0	0	0	0	0	0	0	0	0	0	0	0	0	0	0	0	0	0	0	0	0	0	0	0	0	0	0
OTU_5309	Unassigned	Unassigned	Unassigned	Unassigned	Unassigned	Unassigned	Unassigned	313	22	7.12369e-06	0	0	5	0	0	0	0	0	0	0	0	0	0	0	0	0	0	0	0	0	1	0	0	0	0	0	0	0	0	0	0	0	0	2	0	0	0	0	10
OTU_5373	Unassigned	Unassigned	Unassigned	Unassigned	Unassigned	Unassigned	Unassigned	439	22	7.12369e-06	0	0	10	0	0	0	0	0	0	0	0	0	0	0	0	0	0	0	0	0	0	0	0	0	0	0	0	0	0	0	0	0	0	0	5	0	0	0	0
OTU_7024	Unassigned	Unassigned	Unassigned	Unassigned	Unassigned	Unassigned	Unassigned	438	22	7.12369e-06	0	0	3	0	0	0	0	0	0	0	0	0	0	0	0	0	0	0	0	0	2	0	3	0	4	0	0	0	0	0	0	0	0	0	0	0	0	0	0
OTU_7079	Unassigned	Unassigned	Unassigned	Unassigned	Unassigned	Unassigned	Unassigned	358	22	7.12369e-06	0	0	0	0	0	0	0	0	0	0	0	0	0	0	0	0	13	1	0	0	0	0	0	2	0	0	0	0	0	0	0	0	0	0	0	0	0	0	0
OTU_1629	Unassigned	Unassigned	Unassigned	Unassigned	Unassigned	Unassigned	Unassigned	318	21	6.79988e-06	0	0	0	0	0	0	0	0	0	0	0	0	0	0	0	0	0	0	0	0	0	0	0	2	0	0	0	0	0	0	0	0	0	0	0	0	0	0	0
OTU_2074	Unassigned	Unassigned	Unassigned	Unassigned	Unassigned	Unassigned	Unassigned	307	21	6.79988e-06	0	0	0	0	0	0	0	0	0	1	0	3	0	0	0	0	0	0	0	0	0	0	0	0	0	0	0	0	0	0	0	0	0	0	0	0	0	0	0
OTU_2162	Unassigned	Unassigned	Unassigned	Unassigned	Unassigned	Unassigned	Unassigned	339	21	6.79988e-06	0	0	0	0	13	0	0	0	0	0	0	0	0	0	0	0	0	0	0	0	0	0	2	5	0	0	0	0	0	0	0	0	0	0	0	0	1	0	0
OTU_2234	Unassigned	Unassigned	Unassigned	Unassigned	Unassigned	Unassigned	Unassigned	332	21	6.79988e-06	0	0	0	0	0	0	0	0	0	0	0	0	0	0	0	0	0	0	0	0	21	0	0	0	0	0	0	0	0	0	0	0	0	0	0	0	0	0	0
OTU_2258	Unassigned	Unassigned	Unassigned	Unassigned	Unassigned	Unassigned	Unassigned	357	21	6.79988e-06	4	0	0	0	0	0	0	0	0	16	0	1	0	0	0	0	0	0	0	0	0	0	0	0	0	0	0	0	0	0	0	0	0	0	0	0	0	0	0
OTU_2444	Unassigned	Unassigned	Unassigned	Unassigned	Unassigned	Unassigned	Unassigned	344	21	6.79988e-06	0	0	0	0	0	0	0	0	0	0	0	0	0	0	0	0	0	0	0	0	0	0	2	0	0	0	0	0	0	0	0	0	0	0	0	0	0	0	0
OTU_2492	Unassigned	Unassigned	Unassigned	Unassigned	Unassigned	Unassigned	Unassigned	344	21	6.79988e-06	0	0	0	0	0	0	0	0	0	0	0	0	0	0	0	0	0	0	0	0	0	0	0	1	0	0	0	0	0	0	0	0	0	0	0	0	3	3	0
OTU_2579	Unassigned	Unassigned	Unassigned	Unassigned	Unassigned	Unassigned	Unassigned	339	21	6.79988e-06	0	0	0	0	0	0	0	0	21	0	0	0	0	0	0	0	0	0	0	0	0	0	0	0	0	0	0	0	0	0	0	0	0	0	0	0	0	0	0
OTU_2700	Unassigned	Unassigned	Unassigned	Unassigned	Unassigned	Unassigned	Unassigned	320	21	6.79988e-06	0	0	2	0	0	0	0	0	0	0	0	0	0	0	0	0	0	0	0	0	0	0	0	0	0	0	0	0	0	0	0	0	0	8	0	0	0	0	0
OTU_2799	Unassigned	Unassigned	Unassigned	Unassigned	Unassigned	Unassigned	Unassigned	329	21	6.79988e-06	0	0	0	0	0	2	11	0	0	0	0	0	0	0	0	0	0	0	0	0	2	0	0	0	0	0	0	0	0	0	0	0	0	0	0	0	0	0	0
OTU_2881	Unassigned	Unassigned	Unassigned	Unassigned	Unassigned	Unassigned	Unassigned	350	21	6.79988e-06	0	0	0	0	0	0	0	0	0	0	0	0	0	0	0	0	0	0	0	0	0	0	0	0	0	0	0	0	0	0	0	0	0	0	0	0	0	0	0
OTU_3035	Unassigned	Unassigned	Unassigned	Unassigned	Unassigned	Unassigned	Unassigned	334	21	6.79988e-06	0	0	0	0	0	0	0	0	0	0	0	0	0	0	0	0	0	0	0	0	0	0	0	0	0	0	0	0	0	0	0	0	0	0	0	0	0	0	0
OTU_3468	Unassigned	Unassigned	Unassigned	Unassigned	Unassigned	Unassigned	Unassigned	428	21	6.79988e-06	0	0	0	0	0	0	0	0	0	0	0	0	0	0	0	0	0	0	0	0	0	0	0	0	0	0	0	0	0	0	0	0	0	0	0	0	0	1	0
OTU_3749	Unassigned	Unassigned	Unassigned	Unassigned	Unassigned	Unassigned	Unassigned	339	21	6.79988e-06	0	0	0	0	0	0	0	0	0	0	0	0	0	0	0	0	0	0	0	0	0	0	0	0	3	0	0	0	0	0	0	1	0	0	0	0	0	0	0
OTU_3907	Unassigned	Unassigned	Unassigned	Unassigned	Unassigned	Unassigned	Unassigned	339	21	6.79988e-06	0	0	0	0	0	0	0	0	0	0	0	0	0	0	0	0	0	0	0	0	0	0	0	0	0	0	0	0	0	0	0	0	0	0	0	0	0	0	0
OTU_4118	Unassigned	Unassigned	Unassigned	Unassigned	Unassigned	Unassigned	Unassigned	454	21	6.79988e-06	0	0	0	0	0	0	0	0	0	0	0	0	0	0	0	0	0	0	0	0	0	0	0	0	0	0	0	0	0	0	0	0	0	0	0	0	0	0	0
OTU_4232	Unassigned	Unassigned	Unassigned	Unassigned	Unassigned	Unassigned	Unassigned	484	21	6.79988e-06	0	0	0	0	0	0	0	0	0	0	0	0	0	0	0	0	0	0	0	0	0	0	0	0	0	0	0	0	0	0	0	0	0	0	0	0	0	0	0
OTU_5414	Unassigned	Unassigned	Unassigned	Unassigned	Unassigned	Unassigned	Unassigned	334	21	6.79988e-06	0	0	0	0	0	0	4	0	0	0	0	0	0	0	0	13	0	0	0	0	0	0	0	0	0	0	0	0	0	0	1	0	0	0	0	0	0	0	0
OTU_2213	Unassigned	Unassigned	Unassigned	Unassigned	Unassigned	Unassigned	Unassigned	335	20	6.47608e-06	0	0	0	0	0	0	0	0	0	0	0	0	0	0	0	0	0	11	0	0	0	0	0	0	0	0	0	0	0	0	0	0	0	0	0	0	0	0	0
OTU_2283	Unassigned	Unassigned	Unassigned	Unassigned	Unassigned	Unassigned	Unassigned	345	20	6.47608e-06	0	0	0	0	0	0	0	0	0	0	0	0	0	0	0	0	0	0	0	0	0	0	0	0	0	0	0	0	0	0	0	0	0	0	0	0	0	0	0
OTU_2291	Unassigned	Unassigned	Unassigned	Unassigned	Unassigned	Unassigned	Unassigned	360	20	6.47608e-06	0	0	0	0	0	0	0	0	0	0	0	0	0	0	0	0	0	0	0	0	0	0	0	0	0	0	0	0	0	0	0	0	0	0	0	0	0	0	0
OTU_2385	Unassigned	Unassigned	Unassigned	Unassigned	Unassigned	Unassigned	Unassigned	344	20	6.47608e-06	0	0	0	0	0	0	0	0	0	0	0	0	0	0	0	0	0	0	0	0	0	0	0	7	0	0	0	0	0	0	0	0	0	0	0	0	0	2	0
OTU_2590	Unassigned	Unassigned	Unassigned	Unassigned	Unassigned	Unassigned	Unassigned	422	20	6.47608e-06	0	0	0	0	0	0	0	0	0	0	0	0	0	0	0	0	0	0	0	0	0	0	0	0	0	0	0	0	0	0	0	0	0	0	0	0	0	0	0
OTU_2662	Unassigned	Unassigned	Unassigned	Unassigned	Unassigned	Unassigned	Unassigned	342	20	6.47608e-06	0	0	0	0	0	0	0	0	0	0	0	0	0	0	0	0	0	0	0	0	0	0	0	0	0	0	0	0	0	0	0	3	0	0	2	0	0	0	0
OTU_2699	Unassigned	Unassigned	Unassigned	Unassigned	Unassigned	Unassigned	Unassigned	358	20	6.47608e-06	0	0	0	0	0	0	0	0	0	0	0	0	0	0	0	0	0	0	0	0	0	0	0	0	0	0	0	0	0	0	0	0	0	0	0	0	0	0	0
OTU_2809	Unassigned	Unassigned	Unassigned	Unassigned	Unassigned	Unassigned	Unassigned	334	20	6.47608e-06	0	0	0	0	0	0	0	0	0	0	0	0	0	0	0	0	0	0	0	0	0	0	0	0	0	0	0	0	0	0	0	0	0	0	0	0	0	0	0
OTU_2848	Unassigned	Unassigned	Unassigned	Unassigned	Unassigned	Unassigned	Unassigned	283	20	6.47608e-06	0	0	0	0	0	0	0	0	0	0	0	0	0	0	0	0	0	0	0	0	0	0	0	0	0	0	0	0	0	0	0	0	0	0	0	0	0	0	0
OTU_3082	Unassigned	Unassigned	Unassigned	Unassigned	Unassigned	Unassigned	Unassigned	336	20	6.47608e-06	0	0	0	0	0	0	0	0	20	0	0	0	0	0	0	0	0	0	0	0	0	0	0	0	0	0	0	0	0	0	0	0	0	0	0	0	0	0	0
OTU_3113	Unassigned	Unassigned	Unassigned	Unassigned	Unassigned	Unassigned	Unassigned	345	20	6.47608e-06	0	0	0	0	0	0	0	0	0	0	0	0	0	0	0	0	0	0	0	0	0	0	0	0	0	0	17	0	0	0	0	0	0	0	0	0	0	0	0
OTU_3308	Unassigned	Unassigned	Unassigned	Unassigned	Unassigned	Unassigned	Unassigned	340	20	6.47608e-06	0	0	3	0	1	0	0	0	0	0	0	0	0	0	0	0	0	0	0	0	0	0	0	3	0	0	3	0	0	0	0	0	0	0	0	1	0	0	0
OTU_3315	Unassigned	Unassigned	Unassigned	Unassigned	Unassigned	Unassigned	Unassigned	341	20	6.47608e-06	0	0	0	0	0	0	0	0	0	0	0	0	0	0	0	0	0	0	0	0	0	0	0	0	0	0	0	0	0	0	0	0	0	0	0	0	0	0	0
OTU_3509	Unassigned	Unassigned	Unassigned	Unassigned	Unassigned	Unassigned	Unassigned	348	20	6.47608e-06	0	0	0	0	0	0	0	0	0	0	0	0	0	0	0	0	0	0	0	0	0	0	0	0	0	0	0	0	0	0	0	0	0	0	0	0	0	0	0
OTU_3697	Unassigned	Unassigned	Unassigned	Unassigned	Unassigned	Unassigned	Unassigned	333	20	6.47608e-06	0	0	0	0	0	0	0	0	5	0	0	0	0	0	0	0	0	0	0	0	0	0	0	0	0	0	0	0	0	0	0	0	0	0	0	6	0	0	0
OTU_4376	Unassigned	Unassigned	Unassigned	Unassigned	Unassigned	Unassigned	Unassigned	333	20	6.47608e-06	0	0	0	0	0	0	0	0	0	0	0	0	0	0	0	0	0	0	0	0	0	0	0	3	0	0	0	0	0	0	0	0	0	0	0	0	0	0	0
OTU_4437	Unassigned	Unassigned	Unassigned	Unassigned	Unassigned	Unassigned	Unassigned	347	20	6.47608e-06	0	0	0	0	0	0	0	0	0	0	0	0	0	0	0	0	0	7	0	0	0	0	0	0	0	0	0	0	0	0	0	0	0	0	0	0	0	0	0
OTU_7083	Unassigned	Unassigned	Unassigned	Unassigned	Unassigned	Unassigned	Unassigned	333	20	6.47608e-06	0	0	0	0	0	0	0	0	0	0	0	0	0	0	0	0	5	0	0	0	0	0	0	0	0	0	0	0	0	0	0	0	0	2	0	0	0	0	0
OTU_1888	Unassigned	Unassigned	Unassigned	Unassigned	Unassigned	Unassigned	Unassigned	313	19	6.15228e-06	0	0	0	0	0	0	0	0	0	0	0	0	0	0	0	0	0	0	0	0	0	0	0	0	0	0	0	0	0	0	0	0	0	0	0	0	0	0	13
OTU_1895	Unassigned	Unassigned	Unassigned	Unassigned	Unassigned	Unassigned	Unassigned	327	19	6.15228e-06	0	0	0	0	0	0	0	1	1	0	0	0	0	0	0	0	0	0	0	0	0	0	0	1	0	0	0	0	0	0	0	16	0	0	0	0	0	0	0
OTU_2052	Unassigned	Unassigned	Unassigned	Unassigned	Unassigned	Unassigned	Unassigned	306	19	6.15228e-06	0	0	0	0	0	0	0	0	0	9	0	5	0	0	0	0	0	0	0	0	0	0	0	0	0	0	0	0	0	0	0	0	0	0	0	0	0	0	0
OTU_2186	Unassigned	Unassigned	Unassigned	Unassigned	Unassigned	Unassigned	Unassigned	332	19	6.15228e-06	0	0	0	0	0	0	0	0	5	0	0	0	0	0	0	0	0	0	0	0	0	0	0	0	0	0	0	0	0	0	0	0	0	0	0	0	0	6	0
OTU_2245	Unassigned	Unassigned	Unassigned	Unassigned	Unassigned	Unassigned	Unassigned	335	19	6.15228e-06	0	0	0	0	0	0	0	0	0	0	0	0	0	0	0	0	0	0	0	0	0	0	0	0	0	0	0	0	0	0	0	0	0	0	0	0	0	0	0
OTU_2580	Unassigned	Unassigned	Unassigned	Unassigned	Unassigned	Unassigned	Unassigned	332	19	6.15228e-06	2	0	0	0	0	0	0	0	0	0	0	0	0	15	0	0	0	0	0	0	0	0	0	0	0	0	0	0	0	0	0	0	0	0	0	0	0	0	0
OTU_2634	Unassigned	Unassigned	Unassigned	Unassigned	Unassigned	Unassigned	Unassigned	344	19	6.15228e-06	0	0	0	0	16	0	0	0	0	0	0	0	0	0	0	0	0	0	0	0	0	0	0	0	1	0	0	0	0	0	0	0	0	0	0	0	0	0	0
OTU_2725	Unassigned	Unassigned	Unassigned	Unassigned	Unassigned	Unassigned	Unassigned	358	19	6.15228e-06	0	0	0	0	0	0	0	0	0	0	0	0	0	0	0	0	0	0	0	0	0	0	0	0	0	0	0	0	0	0	0	0	0	0	0	0	3	0	0
OTU_2767	Unassigned	Unassigned	Unassigned	Unassigned	Unassigned	Unassigned	Unassigned	347	19	6.15228e-06	0	0	0	0	0	0	0	0	0	0	0	0	0	0	0	0	0	0	0	0	0	0	0	0	0	0	0	0	0	0	0	0	0	0	0	0	0	0	0
OTU_2888	Unassigned	Unassigned	Unassigned	Unassigned	Unassigned	Unassigned	Unassigned	356	19	6.15228e-06	0	0	0	0	0	0	0	0	0	0	0	0	0	0	0	0	0	0	0	0	0	0	0	0	0	0	0	0	0	0	0	0	0	0	0	0	18	1	0
OTU_2911	Unassigned	Unassigned	Unassigned	Unassigned	Unassigned	Unassigned	Unassigned	340	19	6.15228e-06	0	0	0	0	0	0	0	0	0	0	0	0	0	0	0	0	0	0	0	0	0	0	9	1	0	0	0	0	0	0	0	0	0	0	9	0	0	0	0
OTU_2940	Unassigned	Unassigned	Unassigned	Unassigned	Unassigned	Unassigned	Unassigned	359	19	6.15228e-06	0	0	0	0	0	0	0	0	0	0	0	0	0	0	0	0	2	17	0	0	0	0	0	0	0	0	0	0	0	0	0	0	0	0	0	0	0	0	0
OTU_2958	Unassigned	Unassigned	Unassigned	Unassigned	Unassigned	Unassigned	Unassigned	359	19	6.15228e-06	0	0	0	0	0	0	0	0	0	0	0	0	0	0	0	0	0	0	0	0	0	0	0	0	0	0	0	0	0	0	0	0	0	0	0	0	0	0	0
OTU_3043	Unassigned	Unassigned	Unassigned	Unassigned	Unassigned	Unassigned	Unassigned	334	19	6.15228e-06	0	0	0	0	0	0	0	0	0	0	0	0	0	0	0	0	0	0	0	0	0	0	0	0	0	0	0	0	0	0	0	0	0	0	0	0	0	0	0
OTU_3154	Unassigned	Unassigned	Unassigned	Unassigned	Unassigned	Unassigned	Unassigned	361	19	6.15228e-06	0	0	0	0	0	0	0	0	0	0	0	0	0	0	0	0	0	0	0	0	0	0	0	0	0	0	0	0	0	0	0	0	0	0	0	6	0	0	0
OTU_3236	Unassigned	Unassigned	Unassigned	Unassigned	Unassigned	Unassigned	Unassigned	340	19	6.15228e-06	0	0	0	0	0	0	0	0	0	0	0	0	0	0	0	0	0	0	0	0	0	0	0	0	0	0	0	0	0	0	0	0	0	0	0	0	0	0	0
OTU_3506	Unassigned	Unassigned	Unassigned	Unassigned	Unassigned	Unassigned	Unassigned	331	19	6.15228e-06	0	0	0	0	0	0	0	0	0	0	0	0	0	0	0	0	0	0	0	0	0	0	0	0	0	0	0	0	0	0	0	0	0	0	0	0	0	0	0
OTU_4053	Unassigned	Unassigned	Unassigned	Unassigned	Unassigned	Unassigned	Unassigned	334	19	6.15228e-06	0	0	0	0	0	0	0	0	0	0	0	0	0	0	0	0	0	3	0	0	0	0	0	1	1	0	0	0	0	0	0	0	0	0	0	0	0	0	0
OTU_4117	Unassigned	Unassigned	Unassigned	Unassigned	Unassigned	Unassigned	Unassigned	354	19	6.15228e-06	0	0	0	0	0	0	0	0	0	0	0	0	0	0	0	0	0	0	0	0	0	0	0	0	0	0	0	0	0	0	0	0	0	0	0	0	0	0	0
OTU_4266	Unassigned	Unassigned	Unassigned	Unassigned	Unassigned	Unassigned	Unassigned	344	19	6.15228e-06	0	0	0	0	0	0	0	0	0	0	0	0	0	0	0	0	0	18	0	0	0	0	0	0	0	0	0	0	0	0	0	0	0	0	0	0	0	0	0
OTU_4423	Unassigned	Unassigned	Unassigned	Unassigned	Unassigned	Unassigned	Unassigned	416	19	6.15228e-06	0	0	0	0	0	0	0	0	0	0	0	0	0	0	0	0	0	0	0	0	0	0	0	0	0	0	0	0	0	0	0	0	0	0	0	0	0	0	19
OTU_4527	Unassigned	Unassigned	Unassigned	Unassigned	Unassigned	Unassigned	Unassigned	345	19	6.15228e-06	0	0	0	0	0	0	0	0	0	0	0	0	0	0	0	0	0	0	0	0	0	0	0	0	0	0	0	0	0	0	0	0	0	0	0	0	0	0	0
OTU_4711	Unassigned	Unassigned	Unassigned	Unassigned	Unassigned	Unassigned	Unassigned	340	19	6.15228e-06	0	0	3	0	0	0	0	0	0	0	0	0	0	0	0	0	0	0	0	0	4	0	0	0	0	0	0	0	0	0	0	0	0	0	0	5	2	0	0
OTU_8078	Unassigned	Unassigned	Unassigned	Unassigned	Unassigned	Unassigned	Unassigned	361	19	6.15228e-06	0	0	0	0	0	0	0	0	0	0	0	0	0	0	0	0	0	0	0	0	0	0	0	0	0	0	0	0	0	0	0	0	0	10	0	0	0	0	0
OTU_8514	Unassigned	Unassigned	Unassigned	Unassigned	Unassigned	Unassigned	Unassigned	331	19	6.15228e-06	0	0	0	0	0	0	0	0	0	0	0	0	0	0	0	0	0	3	0	0	6	0	0	0	0	0	0	0	0	0	0	0	0	0	0	0	0	0	0
OTU_2418	Unassigned	Unassigned	Unassigned	Unassigned	Unassigned	Unassigned	Unassigned	335	18	5.82847e-06	0	0	0	0	0	0	0	0	0	0	0	0	0	0	0	0	0	0	0	0	0	0	0	0	0	0	0	0	0	0	0	0	0	0	0	0	0	0	0
OTU_2467	Unassigned	Unassigned	Unassigned	Unassigned	Unassigned	Unassigned	Unassigned	358	18	5.82847e-06	0	0	0	0	0	0	0	0	0	0	0	0	0	0	0	0	0	0	0	0	3	0	0	0	0	0	0	0	0	0	0	0	0	0	0	0	0	0	0
OTU_2582	Unassigned	Unassigned	Unassigned	Unassigned	Unassigned	Unassigned	Unassigned	332	18	5.82847e-06	0	0	0	0	0	0	0	0	0	0	0	0	0	0	0	0	0	0	0	0	0	0	0	0	0	0	0	0	0	0	0	0	0	0	0	0	0	0	0
OTU_2610	Unassigned	Unassigned	Unassigned	Unassigned	Unassigned	Unassigned	Unassigned	341	18	5.82847e-06	0	0	0	0	0	0	0	0	0	0	0	0	0	0	0	0	0	18	0	0	0	0	0	0	0	0	0	0	0	0	0	0	0	0	0	0	0	0	0
OTU_2664	Unassigned	Unassigned	Unassigned	Unassigned	Unassigned	Unassigned	Unassigned	354	18	5.82847e-06	0	0	0	0	0	0	0	0	0	0	0	0	0	0	0	0	0	0	0	0	0	0	0	2	0	0	0	0	0	0	0	0	0	0	0	0	0	0	0
OTU_2737	Unassigned	Unassigned	Unassigned	Unassigned	Unassigned	Unassigned	Unassigned	411	18	5.82847e-06	18	0	0	0	0	0	0	0	0	0	0	0	0	0	0	0	0	0	0	0	0	0	0	0	0	0	0	0	0	0	0	0	0	0	0	0	0	0	0
OTU_2859	Unassigned	Unassigned	Unassigned	Unassigned	Unassigned	Unassigned	Unassigned	371	18	5.82847e-06	0	0	0	0	0	0	0	0	0	0	0	0	0	0	0	0	0	0	0	0	0	0	0	0	0	0	0	0	0	0	0	0	0	0	0	0	0	0	0
OTU_2875	Unassigned	Unassigned	Unassigned	Unassigned	Unassigned	Unassigned	Unassigned	332	18	5.82847e-06	0	0	0	0	0	0	0	0	0	0	0	0	0	0	0	0	0	0	0	0	0	0	0	0	0	0	0	0	0	0	0	0	0	0	0	0	3	0	0
OTU_2966	Unassigned	Unassigned	Unassigned	Unassigned	Unassigned	Unassigned	Unassigned	327	18	5.82847e-06	0	0	0	0	0	0	0	0	0	0	0	0	0	0	0	0	0	0	0	0	0	0	0	0	0	4	0	0	0	0	0	0	0	0	0	0	0	0	6
OTU_3123	Unassigned	Unassigned	Unassigned	Unassigned	Unassigned	Unassigned	Unassigned	333	18	5.82847e-06	0	0	0	0	0	0	0	0	0	0	0	0	0	0	0	0	0	0	0	0	0	0	0	0	0	0	0	0	0	0	0	0	0	0	0	0	0	0	0
OTU_3126	Unassigned	Unassigned	Unassigned	Unassigned	Unassigned	Unassigned	Unassigned	357	18	5.82847e-06	0	0	0	0	0	0	0	0	0	0	0	0	0	0	0	0	0	0	0	0	0	0	0	0	0	0	0	0	0	0	0	3	0	0	4	0	0	0	0
OTU_3251	Unassigned	Unassigned	Unassigned	Unassigned	Unassigned	Unassigned	Unassigned	434	18	5.82847e-06	0	0	0	0	16	0	0	0	0	0	0	0	0	0	0	0	0	0	0	0	0	0	0	0	0	0	0	0	0	0	0	0	0	0	0	0	0	0	0
OTU_3278	Unassigned	Unassigned	Unassigned	Unassigned	Unassigned	Unassigned	Unassigned	329	18	5.82847e-06	0	0	0	0	0	0	0	0	0	0	0	0	0	0	0	0	0	0	0	0	0	0	0	0	0	0	0	0	0	0	3	0	0	0	7	0	0	0	0
OTU_3400	Unassigned	Unassigned	Unassigned	Unassigned	Unassigned	Unassigned	Unassigned	342	18	5.82847e-06	0	0	0	0	0	0	0	0	0	0	0	0	0	0	0	0	0	0	0	0	0	0	0	0	0	0	0	0	0	0	0	0	0	0	0	0	0	0	0
OTU_3445	Unassigned	Unassigned	Unassigned	Unassigned	Unassigned	Unassigned	Unassigned	335	18	5.82847e-06	0	0	0	0	0	0	0	0	0	0	0	0	0	0	0	0	0	0	0	0	0	0	1	0	0	0	0	0	0	0	0	0	0	0	0	0	0	0	0
OTU_3517	Unassigned	Unassigned	Unassigned	Unassigned	Unassigned	Unassigned	Unassigned	340	18	5.82847e-06	0	0	0	0	0	0	0	0	0	0	0	0	0	0	0	0	0	0	0	0	0	0	0	0	0	0	0	0	0	0	0	0	0	0	0	0	0	0	0
OTU_3933	Unassigned	Unassigned	Unassigned	Unassigned	Unassigned	Unassigned	Unassigned	346	18	5.82847e-06	0	0	2	0	0	0	0	0	0	0	0	0	0	0	0	0	2	0	0	0	0	0	0	2	0	0	0	0	6	0	0	0	0	6	0	0	0	0	0
OTU_3987	Unassigned	Unassigned	Unassigned	Unassigned	Unassigned	Unassigned	Unassigned	456	18	5.82847e-06	0	0	17	0	0	0	0	0	0	0	0	0	0	0	0	0	0	0	0	0	0	0	0	1	0	0	0	0	0	0	0	0	0	0	0	0	0	0	0
OTU_4070	Unassigned	Unassigned	Unassigned	Unassigned	Unassigned	Unassigned	Unassigned	382	18	5.82847e-06	0	0	0	0	0	0	0	0	0	0	0	0	0	0	0	0	0	0	0	0	0	0	3	0	0	0	15	0	0	0	0	0	0	0	0	0	0	0	0
OTU_4352	Unassigned	Unassigned	Unassigned	Unassigned	Unassigned	Unassigned	Unassigned	332	18	5.82847e-06	0	0	0	0	0	0	0	0	0	0	0	0	0	0	0	0	0	0	0	0	0	0	0	0	0	0	0	0	0	0	0	0	0	0	0	0	0	0	0
OTU_4374	Unassigned	Unassigned	Unassigned	Unassigned	Unassigned	Unassigned	Unassigned	276	18	5.82847e-06	0	0	0	2	0	0	0	0	0	0	0	0	0	0	0	0	0	0	0	0	0	0	0	0	0	0	0	0	0	0	0	0	0	0	1	0	2	0	6
OTU_4620	Unassigned	Unassigned	Unassigned	Unassigned	Unassigned	Unassigned	Unassigned	351	18	5.82847e-06	0	0	0	0	0	0	0	0	0	0	0	0	0	0	0	0	0	0	0	0	4	0	0	0	0	0	0	0	0	0	0	6	0	0	0	0	0	0	0
OTU_5656	Unassigned	Unassigned	Unassigned	Unassigned	Unassigned	Unassigned	Unassigned	313	18	5.82847e-06	0	0	0	0	0	0	0	0	0	0	16	0	0	0	0	0	0	0	0	0	0	0	2	0	0	0	0	0	0	0	0	0	0	0	0	0	0	0	0
OTU_6034	Unassigned	Unassigned	Unassigned	Unassigned	Unassigned	Unassigned	Unassigned	342	18	5.82847e-06	0	0	0	0	0	0	0	0	0	0	0	0	0	0	0	0	0	0	0	0	0	0	0	8	0	0	0	0	0	0	0	0	0	0	0	0	0	0	0
OTU_6949	Unassigned	Unassigned	Unassigned	Unassigned	Unassigned	Unassigned	Unassigned	329	18	5.82847e-06	0	0	0	1	0	0	0	0	0	0	0	0	0	0	0	0	0	0	0	0	0	0	2	0	0	0	0	0	0	0	0	1	0	1	1	0	1	4	0
OTU_7273	Unassigned	Unassigned	Unassigned	Unassigned	Unassigned	Unassigned	Unassigned	352	18	5.82847e-06	0	0	0	0	0	0	0	0	0	0	0	0	0	0	0	0	0	0	0	0	0	3	0	0	0	0	0	0	0	0	0	0	0	0	0	0	0	0	0
OTU_8458	Unassigned	Unassigned	Unassigned	Unassigned	Unassigned	Unassigned	Unassigned	470	18	5.82847e-06	0	0	1	0	1	0	0	0	0	0	0	0	0	0	0	0	15	0	0	0	0	0	0	0	0	0	0	0	0	0	0	0	0	0	0	0	0	0	0
OTU_2034	Unassigned	Unassigned	Unassigned	Unassigned	Unassigned	Unassigned	Unassigned	346	17	5.50467e-06	0	0	0	0	5	0	0	0	0	0	0	0	0	0	0	0	0	0	0	0	0	0	0	0	0	0	0	5	3	0	0	0	0	0	0	0	0	0	0
OTU_2197	Unassigned	Unassigned	Unassigned	Unassigned	Unassigned	Unassigned	Unassigned	350	17	5.50467e-06	0	0	0	0	0	0	0	0	0	0	0	0	0	0	0	0	0	0	0	0	0	0	0	0	0	0	0	0	0	0	0	0	0	0	0	0	0	0	0
OTU_2411	Unassigned	Unassigned	Unassigned	Unassigned	Unassigned	Unassigned	Unassigned	338	17	5.50467e-06	0	0	0	0	0	0	0	0	0	0	0	0	0	0	0	0	0	0	0	0	0	0	0	0	0	0	0	0	0	0	0	0	0	0	0	0	0	0	0
OTU_2439	Unassigned	Unassigned	Unassigned	Unassigned	Unassigned	Unassigned	Unassigned	349	17	5.50467e-06	0	0	3	0	0	0	0	0	0	0	0	0	0	0	0	0	0	0	0	0	0	0	0	0	0	0	0	0	0	0	0	0	0	0	0	0	3	0	0
OTU_2489	Unassigned	Unassigned	Unassigned	Unassigned	Unassigned	Unassigned	Unassigned	420	17	5.50467e-06	0	0	0	0	0	0	0	0	0	0	0	0	0	17	0	0	0	0	0	0	0	0	0	0	0	0	0	0	0	0	0	0	0	0	0	0	0	0	0
OTU_2843	Unassigned	Unassigned	Unassigned	Unassigned	Unassigned	Unassigned	Unassigned	336	17	5.50467e-06	17	0	0	0	0	0	0	0	0	0	0	0	0	0	0	0	0	0	0	0	0	0	0	0	0	0	0	0	0	0	0	0	0	0	0	0	0	0	0
OTU_2849	Unassigned	Unassigned	Unassigned	Unassigned	Unassigned	Unassigned	Unassigned	386	17	5.50467e-06	0	0	0	0	0	0	0	0	0	0	0	0	0	0	0	0	0	0	0	0	0	0	0	0	0	0	0	0	0	0	0	0	0	0	0	0	0	0	0
OTU_2880	Unassigned	Unassigned	Unassigned	Unassigned	Unassigned	Unassigned	Unassigned	360	17	5.50467e-06	0	0	0	0	0	0	0	0	0	0	0	0	0	0	0	0	0	0	0	0	0	0	0	0	0	0	0	0	0	0	0	0	0	2	0	0	3	0	0
OTU_2919	Unassigned	Unassigned	Unassigned	Unassigned	Unassigned	Unassigned	Unassigned	368	17	5.50467e-06	0	0	0	0	0	0	0	0	0	0	0	0	0	0	0	0	0	0	0	0	0	0	0	0	0	0	0	0	0	0	0	0	0	0	0	0	0	0	0
OTU_3052	Unassigned	Unassigned	Unassigned	Unassigned	Unassigned	Unassigned	Unassigned	331	17	5.50467e-06	0	0	0	0	0	0	0	0	0	0	0	0	0	0	0	0	0	0	0	0	0	0	0	0	0	0	0	0	0	0	0	6	0	8	0	0	0	0	0
OTU_3075	Unassigned	Unassigned	Unassigned	Unassigned	Unassigned	Unassigned	Unassigned	332	17	5.50467e-06	0	0	0	0	0	0	0	0	0	0	0	0	0	0	0	0	0	0	0	0	0	0	0	0	0	0	0	0	0	0	0	0	0	0	0	0	0	0	0
OTU_3098	Unassigned	Unassigned	Unassigned	Unassigned	Unassigned	Unassigned	Unassigned	324	17	5.50467e-06	0	0	0	0	2	0	0	0	0	0	0	0	0	0	0	0	0	0	0	0	0	0	0	0	0	0	0	0	0	0	0	0	0	0	0	0	0	0	0
OTU_3137	Unassigned	Unassigned	Unassigned	Unassigned	Unassigned	Unassigned	Unassigned	324	17	5.50467e-06	0	0	0	0	0	0	0	0	0	0	0	0	0	0	0	0	0	0	0	0	0	0	0	2	0	0	0	0	0	0	0	0	0	0	0	0	4	0	0
OTU_3645	Unassigned	Unassigned	Unassigned	Unassigned	Unassigned	Unassigned	Unassigned	333	17	5.50467e-06	0	0	0	0	0	0	0	0	0	0	0	0	0	0	0	0	0	0	0	0	0	0	0	0	0	0	0	0	0	0	0	0	0	0	0	0	0	0	0
OTU_3720	Unassigned	Unassigned	Unassigned	Unassigned	Unassigned	Unassigned	Unassigned	434	17	5.50467e-06	0	0	0	0	0	0	0	0	0	0	0	0	0	0	0	0	0	16	0	0	0	0	0	0	0	0	0	0	0	0	0	0	0	0	0	0	0	0	0
OTU_3837	Unassigned	Unassigned	Unassigned	Unassigned	Unassigned	Unassigned	Unassigned	333	17	5.50467e-06	5	0	0	0	0	0	0	0	0	0	0	0	0	0	0	0	0	0	0	0	0	0	0	0	0	0	0	0	0	0	0	0	0	0	3	0	0	2	0
OTU_3881	Unassigned	Unassigned	Unassigned	Unassigned	Unassigned	Unassigned	Unassigned	336	17	5.50467e-06	0	0	0	0	0	0	0	7	0	0	0	0	0	0	0	0	0	0	0	0	0	0	0	0	0	0	0	0	0	0	0	0	0	0	0	0	0	8	0
OTU_4138	Unassigned	Unassigned	Unassigned	Unassigned	Unassigned	Unassigned	Unassigned	336	17	5.50467e-06	0	0	0	0	0	0	0	0	17	0	0	0	0	0	0	0	0	0	0	0	0	0	0	0	0	0	0	0	0	0	0	0	0	0	0	0	0	0	0
OTU_4269	Unassigned	Unassigned	Unassigned	Unassigned	Unassigned	Unassigned	Unassigned	360	17	5.50467e-06	0	0	0	0	0	0	0	0	0	0	0	0	0	0	0	0	0	2	0	0	0	0	0	6	0	0	2	0	0	0	0	0	0	0	0	0	3	2	0
OTU_4871	Unassigned	Unassigned	Unassigned	Unassigned	Unassigned	Unassigned	Unassigned	432	17	5.50467e-06	0	0	0	0	0	0	0	0	0	0	0	0	0	0	0	0	0	0	0	0	0	0	0	0	0	0	0	0	0	0	0	0	0	0	0	0	0	0	0
OTU_5071	Unassigned	Unassigned	Unassigned	Unassigned	Unassigned	Unassigned	Unassigned	406	17	5.50467e-06	0	0	3	0	0	0	0	0	0	0	0	0	0	0	0	0	0	0	0	0	0	0	0	1	0	0	0	0	0	0	0	0	0	0	0	0	0	0	0
OTU_5169	Unassigned	Unassigned	Unassigned	Unassigned	Unassigned	Unassigned	Unassigned	324	17	5.50467e-06	0	0	0	0	0	0	0	0	0	0	0	0	0	0	0	0	0	0	0	0	0	0	0	0	0	0	0	0	0	0	0	0	0	0	0	0	0	0	0
OTU_5201	Unassigned	Unassigned	Unassigned	Unassigned	Unassigned	Unassigned	Unassigned	341	17	5.50467e-06	0	0	0	0	0	0	0	7	0	0	0	0	0	0	0	0	0	0	0	0	2	0	0	0	0	0	0	0	0	0	0	0	0	0	0	0	0	0	0
OTU_5207	Unassigned	Unassigned	Unassigned	Unassigned	Unassigned	Unassigned	Unassigned	334	17	5.50467e-06	0	0	0	0	0	0	0	0	15	0	0	0	0	0	0	0	0	0	0	0	0	0	0	0	0	0	0	0	0	0	0	0	0	0	0	0	0	0	0
OTU_5383	Unassigned	Unassigned	Unassigned	Unassigned	Unassigned	Unassigned	Unassigned	322	17	5.50467e-06	0	0	10	0	0	0	0	0	0	0	0	0	0	0	0	0	5	2	0	0	0	0	0	0	0	0	0	0	0	0	0	0	0	0	0	0	0	0	0
OTU_5619	Unassigned	Unassigned	Unassigned	Unassigned	Unassigned	Unassigned	Unassigned	315	17	5.50467e-06	9	0	2	0	0	0	0	0	0	0	0	0	0	0	0	0	0	0	0	4	0	0	0	0	0	0	0	0	0	0	0	0	0	0	0	0	0	0	0
OTU_5688	Unassigned	Unassigned	Unassigned	Unassigned	Unassigned	Unassigned	Unassigned	438	17	5.50467e-06	0	0	0	0	15	0	0	0	0	0	0	0	0	0	0	0	2	0	0	0	0	0	0	0	0	0	0	0	0	0	0	0	0	0	0	0	0	0	0
OTU_6739	Unassigned	Unassigned	Unassigned	Unassigned	Unassigned	Unassigned	Unassigned	429	17	5.50467e-06	0	0	0	0	0	0	0	0	0	0	0	0	0	0	0	0	0	0	0	0	0	0	0	0	0	0	0	0	0	0	0	0	0	0	14	0	0	0	0
OTU_6915	Unassigned	Unassigned	Unassigned	Unassigned	Unassigned	Unassigned	Unassigned	337	17	5.50467e-06	0	0	0	0	6	0	0	0	0	0	0	0	0	0	0	0	5	0	0	0	0	0	0	0	0	0	0	0	3	0	0	0	0	0	0	0	0	0	0
OTU_7203	Unassigned	Unassigned	Unassigned	Unassigned	Unassigned	Unassigned	Unassigned	412	17	5.50467e-06	0	0	0	0	0	0	0	4	0	0	0	0	0	0	3	0	0	0	0	0	0	0	0	0	0	0	0	0	0	0	0	0	0	0	0	0	0	0	0
OTU_8783	Unassigned	Unassigned	Unassigned	Unassigned	Unassigned	Unassigned	Unassigned	462	17	5.50467e-06	0	0	0	0	0	0	0	0	0	0	0	0	0	0	0	0	0	0	0	0	0	0	0	0	0	0	0	0	0	0	0	0	0	0	0	0	0	3	0
OTU_2380	Unassigned	Unassigned	Unassigned	Unassigned	Unassigned	Unassigned	Unassigned	342	16	5.18086e-06	0	0	0	0	0	0	0	0	0	0	0	0	0	6	10	0	0	0	0	0	0	0	0	0	0	0	0	0	0	0	0	0	0	0	0	0	0	0	0
OTU_2518	Unassigned	Unassigned	Unassigned	Unassigned	Unassigned	Unassigned	Unassigned	345	16	5.18086e-06	0	0	0	0	0	0	0	0	0	0	0	0	0	0	0	0	0	0	0	0	0	0	0	0	0	0	0	0	0	0	0	0	0	0	0	0	0	0	0
OTU_2586	Unassigned	Unassigned	Unassigned	Unassigned	Unassigned	Unassigned	Unassigned	351	16	5.18086e-06	0	2	0	0	0	0	0	0	0	0	0	0	0	0	0	0	0	0	0	0	0	0	0	0	0	0	0	0	0	0	0	0	0	0	0	0	0	0	0
OTU_2606	Unassigned	Unassigned	Unassigned	Unassigned	Unassigned	Unassigned	Unassigned	286	16	5.18086e-06	0	0	0	0	0	0	2	0	0	0	0	0	0	0	0	0	0	0	0	0	0	2	0	0	0	0	0	0	0	0	0	0	0	0	0	0	0	0	0
OTU_2631	Unassigned	Unassigned	Unassigned	Unassigned	Unassigned	Unassigned	Unassigned	340	16	5.18086e-06	0	0	0	0	0	0	0	0	0	0	0	0	0	0	0	0	0	0	0	0	0	0	0	0	0	0	0	0	0	0	0	16	0	0	0	0	0	0	0
OTU_2690	Unassigned	Unassigned	Unassigned	Unassigned	Unassigned	Unassigned	Unassigned	341	16	5.18086e-06	0	0	0	0	0	0	0	0	0	0	0	0	0	0	0	0	0	0	0	0	0	0	0	2	0	0	13	0	0	0	0	0	0	0	0	0	0	0	0
OTU_2729	Unassigned	Unassigned	Unassigned	Unassigned	Unassigned	Unassigned	Unassigned	339	16	5.18086e-06	16	0	0	0	0	0	0	0	0	0	0	0	0	0	0	0	0	0	0	0	0	0	0	0	0	0	0	0	0	0	0	0	0	0	0	0	0	0	0
OTU_2832	Unassigned	Unassigned	Unassigned	Unassigned	Unassigned	Unassigned	Unassigned	338	16	5.18086e-06	0	0	0	0	0	0	0	0	0	0	0	0	0	0	0	0	0	0	0	0	0	0	3	0	0	0	10	0	0	0	0	1	0	0	0	0	0	0	0
OTU_2909	Unassigned	Unassigned	Unassigned	Unassigned	Unassigned	Unassigned	Unassigned	333	16	5.18086e-06	0	0	3	0	0	0	0	0	0	0	0	0	0	0	0	0	0	0	0	0	0	0	0	0	0	0	0	0	0	0	0	0	0	0	0	0	0	0	0
OTU_2955	Unassigned	Unassigned	Unassigned	Unassigned	Unassigned	Unassigned	Unassigned	332	16	5.18086e-06	0	0	0	0	0	0	0	0	0	0	0	0	0	0	0	0	0	0	0	0	0	0	0	0	0	0	0	0	0	0	0	0	0	0	0	0	0	0	0
OTU_2994	Unassigned	Unassigned	Unassigned	Unassigned	Unassigned	Unassigned	Unassigned	403	16	5.18086e-06	0	0	0	0	0	0	0	0	0	0	0	0	0	0	0	0	0	0	0	0	0	0	0	0	0	0	0	0	0	0	0	0	0	0	0	0	0	0	0
OTU_3107	Unassigned	Unassigned	Unassigned	Unassigned	Unassigned	Unassigned	Unassigned	349	16	5.18086e-06	0	0	0	0	0	0	0	0	0	0	0	0	0	0	0	0	0	0	0	0	0	0	2	0	0	0	0	0	0	0	0	0	0	0	0	14	0	0	0
OTU_3441	Unassigned	Unassigned	Unassigned	Unassigned	Unassigned	Unassigned	Unassigned	348	16	5.18086e-06	0	0	0	0	0	0	0	0	0	0	0	0	0	0	0	0	0	0	0	0	0	0	0	0	0	0	0	0	0	0	0	0	0	1	0	0	3	0	0
OTU_3632	Unassigned	Unassigned	Unassigned	Unassigned	Unassigned	Unassigned	Unassigned	356	16	5.18086e-06	0	0	0	0	0	0	0	0	0	0	7	0	0	0	0	0	0	0	0	0	0	0	0	0	0	0	0	0	0	0	0	0	0	0	0	0	0	0	0
OTU_3851	Unassigned	Unassigned	Unassigned	Unassigned	Unassigned	Unassigned	Unassigned	355	16	5.18086e-06	0	0	0	0	0	0	0	0	0	0	0	0	0	0	0	0	0	0	0	0	0	0	0	0	0	0	0	0	0	0	0	0	0	0	0	0	0	0	0
OTU_3945	Unassigned	Unassigned	Unassigned	Unassigned	Unassigned	Unassigned	Unassigned	324	16	5.18086e-06	10	0	0	0	0	0	0	0	0	0	0	0	0	5	0	0	0	0	0	0	0	0	0	0	0	0	0	0	0	0	0	0	0	0	0	0	0	0	0
OTU_3974	Unassigned	Unassigned	Unassigned	Unassigned	Unassigned	Unassigned	Unassigned	343	16	5.18086e-06	0	0	0	0	0	0	0	0	0	0	0	0	0	0	0	0	0	0	0	0	0	0	0	0	0	0	0	0	9	0	0	0	0	0	0	0	0	0	0
OTU_4574	Unassigned	Unassigned	Unassigned	Unassigned	Unassigned	Unassigned	Unassigned	368	16	5.18086e-06	0	0	0	0	0	0	0	0	0	0	0	0	0	0	0	0	0	0	0	0	0	0	0	0	0	0	0	0	0	0	0	0	0	0	0	0	0	0	0
OTU_5928	Unassigned	Unassigned	Unassigned	Unassigned	Unassigned	Unassigned	Unassigned	341	16	5.18086e-06	0	0	0	0	0	0	0	5	0	0	0	0	0	0	0	0	0	0	0	2	0	0	0	0	0	0	0	0	0	0	0	0	0	0	0	0	0	0	0
OTU_8090	Unassigned	Unassigned	Unassigned	Unassigned	Unassigned	Unassigned	Unassigned	337	16	5.18086e-06	0	0	0	0	0	0	0	0	0	0	0	0	0	0	0	0	0	16	0	0	0	0	0	0	0	0	0	0	0	0	0	0	0	0	0	0	0	0	0
OTU_2029	Unassigned	Unassigned	Unassigned	Unassigned	Unassigned	Unassigned	Unassigned	369	15	4.85706e-06	0	0	0	0	0	0	0	0	0	0	0	0	0	0	0	0	0	0	0	0	0	0	0	0	0	0	0	0	0	0	0	0	0	0	0	0	0	0	0
OTU_2140	Unassigned	Unassigned	Unassigned	Unassigned	Unassigned	Unassigned	Unassigned	344	15	4.85706e-06	0	0	0	0	0	0	0	0	0	0	0	0	0	0	0	0	0	0	0	0	0	0	0	0	0	0	0	0	0	0	0	0	0	0	0	0	0	0	0
OTU_2368	Unassigned	Unassigned	Unassigned	Unassigned	Unassigned	Unassigned	Unassigned	337	15	4.85706e-06	0	0	0	14	0	0	0	0	0	0	0	0	0	0	0	0	0	0	0	0	0	0	0	0	0	0	0	0	0	0	0	0	0	0	0	0	0	0	0
OTU_2399	Unassigned	Unassigned	Unassigned	Unassigned	Unassigned	Unassigned	Unassigned	332	15	4.85706e-06	0	0	0	0	0	0	0	0	0	0	0	0	0	0	0	0	11	0	0	0	0	0	0	1	0	0	0	0	0	0	0	0	0	0	0	0	0	0	0
OTU_2556	Unassigned	Unassigned	Unassigned	Unassigned	Unassigned	Unassigned	Unassigned	345	15	4.85706e-06	0	0	0	0	0	0	0	0	0	0	2	0	0	0	0	0	0	0	0	0	0	0	0	0	0	0	0	0	0	0	0	0	0	0	0	2	0	0	0
OTU_2570	Unassigned	Unassigned	Unassigned	Unassigned	Unassigned	Unassigned	Unassigned	352	15	4.85706e-06	0	0	0	0	0	0	0	0	0	0	0	0	0	0	0	0	2	13	0	0	0	0	0	0	0	0	0	0	0	0	0	0	0	0	0	0	0	0	0
OTU_2613	Unassigned	Unassigned	Unassigned	Unassigned	Unassigned	Unassigned	Unassigned	342	15	4.85706e-06	0	0	0	0	0	0	0	0	0	0	0	0	0	0	0	0	0	0	0	0	0	0	0	0	0	0	0	0	0	0	0	0	0	0	0	0	0	0	0
OTU_2653	Unassigned	Unassigned	Unassigned	Unassigned	Unassigned	Unassigned	Unassigned	346	15	4.85706e-06	0	0	0	0	0	0	0	0	0	0	0	0	0	0	0	0	0	0	0	0	0	0	0	0	0	0	0	0	0	0	0	0	0	0	0	0	0	0	0
OTU_2668	Unassigned	Unassigned	Unassigned	Unassigned	Unassigned	Unassigned	Unassigned	370	15	4.85706e-06	0	0	0	0	0	0	0	0	0	0	0	0	0	0	0	0	0	0	0	0	0	0	0	0	0	0	0	0	0	0	0	10	0	0	0	0	0	0	0
OTU_3237	Unassigned	Unassigned	Unassigned	Unassigned	Unassigned	Unassigned	Unassigned	348	15	4.85706e-06	0	0	0	0	0	0	0	0	0	0	0	0	0	0	0	0	0	0	0	0	2	0	0	0	0	0	1	0	0	0	0	0	0	0	0	0	0	0	0
OTU_3423	Unassigned	Unassigned	Unassigned	Unassigned	Unassigned	Unassigned	Unassigned	333	15	4.85706e-06	0	0	0	0	0	0	0	0	0	0	0	0	0	0	0	0	0	4	0	0	0	0	0	0	4	0	0	0	0	0	0	0	0	0	0	0	0	0	0
OTU_3528	Unassigned	Unassigned	Unassigned	Unassigned	Unassigned	Unassigned	Unassigned	346	15	4.85706e-06	0	0	0	0	0	0	0	0	1	0	0	0	0	0	0	0	0	0	0	0	0	0	0	0	0	0	0	0	0	0	0	0	0	0	0	0	0	0	0
OTU_3735	Unassigned	Unassigned	Unassigned	Unassigned	Unassigned	Unassigned	Unassigned	355	15	4.85706e-06	0	0	0	0	0	0	0	0	0	0	0	0	0	0	0	0	0	0	0	0	0	0	0	0	0	0	0	0	0	0	5	0	0	0	0	0	0	0	0
OTU_4209	Unassigned	Unassigned	Unassigned	Unassigned	Unassigned	Unassigned	Unassigned	409	15	4.85706e-06	0	0	0	0	0	0	0	0	0	0	0	0	0	0	0	0	0	0	0	0	0	0	0	12	0	0	0	0	0	0	0	0	0	0	0	0	0	0	0
OTU_4291	Unassigned	Unassigned	Unassigned	Unassigned	Unassigned	Unassigned	Unassigned	421	15	4.85706e-06	0	0	0	0	0	0	0	0	0	0	0	0	0	0	0	0	0	0	0	0	0	0	0	0	0	0	0	0	0	0	0	0	0	0	0	0	0	0	0
OTU_4296	Unassigned	Unassigned	Unassigned	Unassigned	Unassigned	Unassigned	Unassigned	336	15	4.85706e-06	0	0	0	0	0	0	0	0	0	0	0	0	0	0	0	0	0	0	0	0	0	0	0	3	0	0	0	0	0	0	0	0	0	0	0	0	0	11	0
OTU_4528	Unassigned	Unassigned	Unassigned	Unassigned	Unassigned	Unassigned	Unassigned	328	15	4.85706e-06	0	0	0	0	0	0	0	0	0	0	0	0	0	0	0	0	10	0	0	0	0	0	0	0	0	0	0	0	0	0	0	0	0	0	0	0	0	2	0
OTU_4716	Unassigned	Unassigned	Unassigned	Unassigned	Unassigned	Unassigned	Unassigned	339	15	4.85706e-06	0	0	0	0	0	0	0	0	0	0	0	0	0	0	0	0	0	0	0	0	0	0	0	0	0	0	0	0	0	0	0	0	0	0	0	0	0	0	0
OTU_4767	Unassigned	Unassigned	Unassigned	Unassigned	Unassigned	Unassigned	Unassigned	332	15	4.85706e-06	0	0	0	0	0	0	0	0	0	0	0	0	0	0	0	0	0	0	0	0	0	0	0	0	0	0	0	0	0	0	0	0	0	0	0	0	0	0	0
OTU_4999	Unassigned	Unassigned	Unassigned	Unassigned	Unassigned	Unassigned	Unassigned	341	15	4.85706e-06	0	0	0	0	0	0	0	0	0	0	0	0	0	0	0	0	0	0	0	0	0	0	0	0	0	3	0	0	0	0	0	0	0	0	0	0	0	0	0
OTU_5048	Unassigned	Unassigned	Unassigned	Unassigned	Unassigned	Unassigned	Unassigned	348	15	4.85706e-06	0	0	0	0	0	0	0	0	0	0	0	0	0	0	0	0	0	4	0	0	0	0	0	6	0	0	0	0	0	0	0	0	0	0	0	0	3	0	0
OTU_5101	Unassigned	Unassigned	Unassigned	Unassigned	Unassigned	Unassigned	Unassigned	331	15	4.85706e-06	0	0	0	0	0	0	0	0	0	0	0	0	0	0	0	0	0	0	0	0	0	0	0	0	0	0	0	0	0	0	0	0	0	0	0	0	0	0	0
OTU_5431	Unassigned	Unassigned	Unassigned	Unassigned	Unassigned	Unassigned	Unassigned	356	15	4.85706e-06	0	0	0	3	0	0	0	0	0	0	0	0	0	0	0	0	0	0	0	0	0	0	3	0	0	1	0	0	0	0	0	2	0	0	0	0	0	0	0
OTU_5826	Unassigned	Unassigned	Unassigned	Unassigned	Unassigned	Unassigned	Unassigned	349	15	4.85706e-06	0	0	0	0	0	0	0	0	0	0	0	0	0	0	0	0	0	0	0	0	3	0	0	0	0	0	0	0	0	0	0	0	0	0	0	0	0	0	0
OTU_6010	Unassigned	Unassigned	Unassigned	Unassigned	Unassigned	Unassigned	Unassigned	346	15	4.85706e-06	0	0	0	0	0	0	0	0	0	0	0	0	0	0	0	0	4	0	0	0	0	0	0	0	2	0	0	0	0	0	0	0	0	0	0	0	0	0	0
OTU_6082	Unassigned	Unassigned	Unassigned	Unassigned	Unassigned	Unassigned	Unassigned	354	15	4.85706e-06	0	0	0	0	0	0	0	0	0	0	0	0	0	0	0	0	0	0	0	0	0	0	0	0	0	0	0	0	0	0	0	1	0	0	0	6	0	0	0
OTU_6536	Unassigned	Unassigned	Unassigned	Unassigned	Unassigned	Unassigned	Unassigned	435	15	4.85706e-06	0	0	0	0	0	0	0	0	0	0	0	0	0	0	0	0	0	0	0	0	0	0	0	0	0	0	0	0	1	0	0	0	0	0	0	0	0	0	0
OTU_6664	Unassigned	Unassigned	Unassigned	Unassigned	Unassigned	Unassigned	Unassigned	422	15	4.85706e-06	0	0	0	0	0	0	0	0	0	0	0	0	0	0	0	0	0	0	0	0	0	0	0	0	0	0	0	0	0	0	0	0	0	0	0	0	0	0	0
OTU_8836	Unassigned	Unassigned	Unassigned	Unassigned	Unassigned	Unassigned	Unassigned	349	15	4.85706e-06	0	0	0	0	0	0	0	0	0	0	0	0	0	0	0	0	0	0	0	0	0	0	0	2	0	0	0	0	0	0	1	0	0	7	0	0	0	0	0
OTU_2256	Unassigned	Unassigned	Unassigned	Unassigned	Unassigned	Unassigned	Unassigned	332	14	4.53326e-06	0	0	0	0	0	0	0	0	0	0	0	0	0	0	0	0	0	0	0	0	0	0	0	0	0	0	0	0	0	0	0	0	0	0	0	0	0	0	0
OTU_2531	Unassigned	Unassigned	Unassigned	Unassigned	Unassigned	Unassigned	Unassigned	332	14	4.53326e-06	0	0	0	0	0	0	0	0	0	0	0	0	0	0	0	0	0	0	0	0	0	0	0	0	0	0	0	0	0	0	0	0	0	0	0	0	0	0	0
OTU_2540	Unassigned	Unassigned	Unassigned	Unassigned	Unassigned	Unassigned	Unassigned	337	14	4.53326e-06	0	0	0	0	0	0	0	0	0	0	0	0	0	0	0	0	0	0	0	0	0	0	10	0	0	0	0	0	0	0	0	0	0	0	0	0	4	0	0
OTU_2596	Unassigned	Unassigned	Unassigned	Unassigned	Unassigned	Unassigned	Unassigned	358	14	4.53326e-06	0	0	0	0	0	0	0	0	0	0	0	0	0	0	0	0	0	0	0	0	0	0	0	0	0	0	0	0	0	0	0	0	0	0	0	0	0	0	0
OTU_2607	Unassigned	Unassigned	Unassigned	Unassigned	Unassigned	Unassigned	Unassigned	286	14	4.53326e-06	0	0	0	0	0	0	0	9	0	0	0	0	0	0	0	0	3	0	0	0	0	0	0	0	0	0	0	0	0	0	0	0	0	0	0	0	0	0	0
OTU_2647	Unassigned	Unassigned	Unassigned	Unassigned	Unassigned	Unassigned	Unassigned	335	14	4.53326e-06	0	0	0	0	0	0	0	0	0	0	0	0	0	0	0	0	0	0	0	0	0	0	0	0	0	0	0	0	0	0	0	0	0	0	0	0	0	0	0
OTU_2972	Unassigned	Unassigned	Unassigned	Unassigned	Unassigned	Unassigned	Unassigned	361	14	4.53326e-06	0	0	0	0	0	0	0	0	0	0	0	0	0	0	0	0	0	4	0	0	0	0	0	0	0	0	0	0	0	0	0	0	0	0	0	0	0	0	0
OTU_3138	Unassigned	Unassigned	Unassigned	Unassigned	Unassigned	Unassigned	Unassigned	363	14	4.53326e-06	0	0	0	0	0	0	0	0	0	0	0	0	0	0	0	0	0	0	0	0	0	0	0	0	0	0	0	0	0	0	0	0	0	0	0	0	0	0	0
OTU_3188	Unassigned	Unassigned	Unassigned	Unassigned	Unassigned	Unassigned	Unassigned	336	14	4.53326e-06	0	0	0	0	0	0	0	0	0	0	0	0	0	0	0	0	0	0	0	0	0	0	0	0	0	0	0	0	0	0	6	0	0	0	0	4	0	0	0
OTU_3244	Unassigned	Unassigned	Unassigned	Unassigned	Unassigned	Unassigned	Unassigned	344	14	4.53326e-06	0	0	0	0	0	0	0	0	0	0	0	0	0	0	0	0	0	0	0	0	0	0	0	0	0	0	0	0	0	0	0	8	0	0	0	0	0	0	0
OTU_3295	Unassigned	Unassigned	Unassigned	Unassigned	Unassigned	Unassigned	Unassigned	339	14	4.53326e-06	0	0	6	0	0	0	0	0	0	0	0	0	0	0	0	0	0	0	0	0	0	0	0	0	0	0	0	0	0	0	0	0	0	0	0	0	0	0	0
OTU_3303	Unassigned	Unassigned	Unassigned	Unassigned	Unassigned	Unassigned	Unassigned	316	14	4.53326e-06	0	0	0	0	0	0	0	0	0	0	0	0	0	0	0	0	0	0	0	0	0	0	0	0	0	0	0	0	0	0	0	0	0	0	0	0	0	0	0
OTU_3326	Unassigned	Unassigned	Unassigned	Unassigned	Unassigned	Unassigned	Unassigned	348	14	4.53326e-06	0	0	0	0	0	0	0	0	0	0	0	0	0	0	0	0	0	0	0	0	0	0	0	0	0	0	0	0	0	0	0	0	0	0	0	0	0	0	0
OTU_3396	Unassigned	Unassigned	Unassigned	Unassigned	Unassigned	Unassigned	Unassigned	354	14	4.53326e-06	0	0	0	0	0	0	0	0	0	0	0	0	0	0	0	0	0	0	0	0	0	0	0	0	0	0	0	0	0	0	0	0	0	0	0	0	0	0	0
OTU_3452	Unassigned	Unassigned	Unassigned	Unassigned	Unassigned	Unassigned	Unassigned	345	14	4.53326e-06	0	0	0	0	0	0	0	0	0	0	0	0	0	0	11	0	0	0	0	0	0	0	0	0	0	0	0	0	0	0	0	0	0	0	0	0	0	0	0
OTU_3454	Unassigned	Unassigned	Unassigned	Unassigned	Unassigned	Unassigned	Unassigned	358	14	4.53326e-06	0	0	0	0	0	0	0	0	0	0	0	0	0	0	0	0	0	0	0	0	0	0	0	0	0	0	0	0	0	0	0	0	0	0	0	0	0	0	0
OTU_3676	Unassigned	Unassigned	Unassigned	Unassigned	Unassigned	Unassigned	Unassigned	334	14	4.53326e-06	0	0	0	0	0	0	0	14	0	0	0	0	0	0	0	0	0	0	0	0	0	0	0	0	0	0	0	0	0	0	0	0	0	0	0	0	0	0	0
OTU_4311	Unassigned	Unassigned	Unassigned	Unassigned	Unassigned	Unassigned	Unassigned	354	14	4.53326e-06	0	0	0	0	0	0	2	0	0	0	0	0	0	0	0	0	0	0	0	0	0	0	0	0	0	0	0	0	0	0	0	0	0	0	0	0	0	2	0
OTU_4344	Unassigned	Unassigned	Unassigned	Unassigned	Unassigned	Unassigned	Unassigned	344	14	4.53326e-06	0	0	0	0	0	0	0	0	0	0	0	0	0	0	0	0	0	0	0	0	0	0	0	2	0	0	0	0	0	0	0	0	0	0	0	0	0	0	0
OTU_4401	Unassigned	Unassigned	Unassigned	Unassigned	Unassigned	Unassigned	Unassigned	354	14	4.53326e-06	0	0	0	0	0	0	0	0	0	0	0	0	0	0	0	0	0	0	0	0	0	0	0	0	0	0	14	0	0	0	0	0	0	0	0	0	0	0	0
OTU_4467	Unassigned	Unassigned	Unassigned	Unassigned	Unassigned	Unassigned	Unassigned	339	14	4.53326e-06	0	0	0	0	0	0	0	0	0	0	0	0	0	0	0	0	0	0	0	0	0	0	0	0	2	0	0	0	0	0	0	0	0	0	0	0	0	0	0
OTU_4485	Unassigned	Unassigned	Unassigned	Unassigned	Unassigned	Unassigned	Unassigned	337	14	4.53326e-06	0	0	0	0	0	0	0	0	0	0	0	0	0	0	0	0	0	0	0	0	0	0	0	0	0	0	0	0	0	0	0	0	0	0	0	0	0	0	6
OTU_4586	Unassigned	Unassigned	Unassigned	Unassigned	Unassigned	Unassigned	Unassigned	440	14	4.53326e-06	0	0	0	0	0	0	0	0	0	0	0	0	0	0	0	0	0	0	0	0	0	0	0	0	0	0	0	0	0	0	0	0	0	0	0	0	0	0	0
OTU_4731	Unassigned	Unassigned	Unassigned	Unassigned	Unassigned	Unassigned	Unassigned	333	14	4.53326e-06	0	0	0	0	0	0	0	0	0	0	0	0	0	0	0	0	0	6	0	0	0	0	0	0	0	0	0	0	0	0	0	0	0	0	0	0	0	0	0
OTU_4994	Unassigned	Unassigned	Unassigned	Unassigned	Unassigned	Unassigned	Unassigned	340	14	4.53326e-06	0	0	0	0	0	0	0	0	0	0	0	0	0	0	0	0	0	0	0	0	0	0	0	0	0	0	0	0	0	0	0	0	0	0	0	0	0	0	0
OTU_5130	Unassigned	Unassigned	Unassigned	Unassigned	Unassigned	Unassigned	Unassigned	338	14	4.53326e-06	0	0	0	0	0	0	0	0	0	0	0	0	0	0	0	0	11	0	0	0	0	0	0	0	0	0	0	0	0	0	0	0	0	0	0	0	0	0	0
OTU_5253	Unassigned	Unassigned	Unassigned	Unassigned	Unassigned	Unassigned	Unassigned	355	14	4.53326e-06	0	0	0	0	0	0	0	0	0	0	0	0	0	0	0	0	0	0	0	0	0	0	0	0	0	0	0	0	0	0	0	0	0	0	0	0	6	0	0
OTU_5462	Unassigned	Unassigned	Unassigned	Unassigned	Unassigned	Unassigned	Unassigned	347	14	4.53326e-06	0	0	0	0	0	0	0	0	0	0	0	0	0	0	0	0	0	0	0	0	0	0	0	0	0	0	0	0	0	0	0	0	0	0	0	0	0	0	0
OTU_5728	Unassigned	Unassigned	Unassigned	Unassigned	Unassigned	Unassigned	Unassigned	346	14	4.53326e-06	0	0	0	0	0	0	0	0	0	0	0	0	0	0	0	0	0	0	0	0	0	0	0	0	0	0	0	0	0	0	0	0	0	0	0	0	0	0	0
OTU_6354	Unassigned	Unassigned	Unassigned	Unassigned	Unassigned	Unassigned	Unassigned	361	14	4.53326e-06	0	0	0	0	3	0	0	0	0	0	0	0	0	0	0	0	0	0	0	0	0	0	1	0	0	0	1	0	3	0	0	0	0	0	0	0	0	0	0
OTU_6356	Unassigned	Unassigned	Unassigned	Unassigned	Unassigned	Unassigned	Unassigned	340	14	4.53326e-06	0	0	3	0	0	0	0	0	0	0	0	0	0	0	0	0	0	0	0	0	0	0	0	0	0	0	0	0	0	0	0	0	0	0	0	2	0	0	0
OTU_7809	Unassigned	Unassigned	Unassigned	Unassigned	Unassigned	Unassigned	Unassigned	348	14	4.53326e-06	0	0	0	0	0	0	0	0	0	0	0	0	0	0	0	0	0	0	0	0	0	0	0	0	0	0	0	0	0	0	0	0	0	0	0	0	0	0	0
OTU_8147	Unassigned	Unassigned	Unassigned	Unassigned	Unassigned	Unassigned	Unassigned	372	14	4.53326e-06	0	0	0	0	0	0	0	0	0	0	0	0	0	0	0	0	0	0	0	0	0	0	0	0	0	0	0	0	0	0	0	0	0	0	14	0	0	0	0
OTU_8750	Unassigned	Unassigned	Unassigned	Unassigned	Unassigned	Unassigned	Unassigned	410	14	4.53326e-06	0	0	0	0	0	0	0	0	0	0	0	0	0	0	0	0	0	0	0	0	0	0	0	3	0	0	0	0	0	0	0	0	0	0	0	0	0	0	0
OTU_2334	Unassigned	Unassigned	Unassigned	Unassigned	Unassigned	Unassigned	Unassigned	355	13	4.20945e-06	0	0	0	0	0	0	0	0	0	0	0	0	0	0	0	0	0	0	0	0	0	0	0	4	0	0	0	0	0	0	0	0	0	0	4	0	0	0	0
OTU_2367	Unassigned	Unassigned	Unassigned	Unassigned	Unassigned	Unassigned	Unassigned	342	13	4.20945e-06	0	0	0	0	0	0	0	0	0	0	0	0	0	0	0	0	0	0	0	0	0	0	0	0	0	0	0	0	0	0	0	0	0	0	0	0	0	0	0
OTU_2416	Unassigned	Unassigned	Unassigned	Unassigned	Unassigned	Unassigned	Unassigned	337	13	4.20945e-06	0	0	0	0	0	0	0	0	0	0	0	0	0	0	0	0	0	0	0	0	0	0	0	0	0	0	0	0	0	0	0	0	0	0	0	0	0	0	0
OTU_2535	Unassigned	Unassigned	Unassigned	Unassigned	Unassigned	Unassigned	Unassigned	331	13	4.20945e-06	13	0	0	0	0	0	0	0	0	0	0	0	0	0	0	0	0	0	0	0	0	0	0	0	0	0	0	0	0	0	0	0	0	0	0	0	0	0	0
OTU_2671	Unassigned	Unassigned	Unassigned	Unassigned	Unassigned	Unassigned	Unassigned	388	13	4.20945e-06	0	0	0	0	0	0	0	0	0	0	0	0	0	0	0	0	0	0	0	0	0	0	0	7	0	0	0	0	0	0	0	0	0	0	0	0	0	0	0
OTU_2695	Unassigned	Unassigned	Unassigned	Unassigned	Unassigned	Unassigned	Unassigned	361	13	4.20945e-06	0	0	0	0	0	0	0	0	0	0	0	0	0	0	0	0	0	3	0	0	0	0	0	0	0	0	0	0	0	0	0	0	0	0	0	0	0	0	0
OTU_2754	Unassigned	Unassigned	Unassigned	Unassigned	Unassigned	Unassigned	Unassigned	281	13	4.20945e-06	0	0	0	0	0	0	0	0	0	0	0	0	0	0	0	0	0	0	0	0	0	0	0	0	0	0	0	0	0	0	0	0	0	0	0	0	0	0	0
OTU_2857	Unassigned	Unassigned	Unassigned	Unassigned	Unassigned	Unassigned	Unassigned	267	13	4.20945e-06	0	0	0	0	0	0	0	0	0	0	0	0	0	0	0	0	0	0	0	0	0	0	0	0	0	0	0	0	0	0	0	0	0	0	0	0	0	0	0
OTU_2883	Unassigned	Unassigned	Unassigned	Unassigned	Unassigned	Unassigned	Unassigned	342	13	4.20945e-06	0	0	0	0	0	0	0	0	0	0	0	0	0	0	0	0	0	0	0	0	0	0	0	0	0	0	0	0	0	0	0	0	0	0	0	0	2	6	0
OTU_3009	Unassigned	Unassigned	Unassigned	Unassigned	Unassigned	Unassigned	Unassigned	314	13	4.20945e-06	0	0	0	0	0	0	0	0	0	0	0	0	0	0	0	0	0	0	0	0	0	0	0	0	0	0	0	0	0	0	0	0	0	0	0	0	0	0	0
OTU_3105	Unassigned	Unassigned	Unassigned	Unassigned	Unassigned	Unassigned	Unassigned	395	13	4.20945e-06	0	0	0	0	0	0	0	0	0	0	0	0	0	0	0	0	0	0	0	0	0	0	0	0	0	0	0	0	0	0	0	0	0	0	0	0	0	0	0
OTU_3134	Unassigned	Unassigned	Unassigned	Unassigned	Unassigned	Unassigned	Unassigned	335	13	4.20945e-06	0	0	0	0	0	1	0	0	0	0	0	0	0	0	0	0	0	0	0	0	0	0	0	0	0	0	0	0	0	0	0	0	0	0	0	0	0	0	0
OTU_3174	Unassigned	Unassigned	Unassigned	Unassigned	Unassigned	Unassigned	Unassigned	350	13	4.20945e-06	0	0	0	0	0	0	0	0	0	0	0	0	0	0	0	0	0	0	0	0	0	0	0	0	0	0	0	0	0	0	0	0	0	0	0	0	0	0	0
OTU_3321	Unassigned	Unassigned	Unassigned	Unassigned	Unassigned	Unassigned	Unassigned	344	13	4.20945e-06	0	0	0	0	0	0	0	0	0	0	0	0	0	0	0	0	0	0	0	0	0	0	0	0	0	0	0	0	0	0	0	0	0	0	0	3	0	0	0
OTU_3416	Unassigned	Unassigned	Unassigned	Unassigned	Unassigned	Unassigned	Unassigned	342	13	4.20945e-06	0	0	0	0	3	0	0	0	0	0	0	0	0	0	0	0	0	0	0	0	0	0	0	0	0	0	0	0	0	0	0	0	0	0	0	0	0	0	0
OTU_3640	Unassigned	Unassigned	Unassigned	Unassigned	Unassigned	Unassigned	Unassigned	351	13	4.20945e-06	0	0	0	0	0	0	0	0	0	0	0	0	0	0	0	0	0	0	0	0	0	0	0	0	0	0	0	0	0	0	0	0	0	0	0	0	0	0	0
OTU_3686	Unassigned	Unassigned	Unassigned	Unassigned	Unassigned	Unassigned	Unassigned	428	13	4.20945e-06	0	0	0	0	0	0	0	0	0	0	0	0	0	0	0	0	0	0	0	0	0	0	0	0	0	0	0	0	0	0	0	0	0	0	0	0	13	0	0
OTU_3758	Unassigned	Unassigned	Unassigned	Unassigned	Unassigned	Unassigned	Unassigned	360	13	4.20945e-06	0	0	0	0	0	0	0	0	0	0	0	0	0	0	0	0	0	0	0	0	0	0	3	0	0	0	0	0	0	0	0	0	0	0	0	0	0	0	0
OTU_3770	Unassigned	Unassigned	Unassigned	Unassigned	Unassigned	Unassigned	Unassigned	447	13	4.20945e-06	0	0	0	0	0	0	0	0	0	0	0	0	0	0	0	0	0	0	0	0	0	0	3	0	0	0	0	0	0	0	0	0	0	0	0	0	0	0	0
OTU_4031	Unassigned	Unassigned	Unassigned	Unassigned	Unassigned	Unassigned	Unassigned	348	13	4.20945e-06	0	0	0	0	0	0	2	0	0	0	0	0	0	0	0	0	0	0	0	0	0	0	0	0	0	0	0	0	0	0	0	0	0	0	0	0	0	0	0
OTU_4058	Unassigned	Unassigned	Unassigned	Unassigned	Unassigned	Unassigned	Unassigned	337	13	4.20945e-06	0	0	0	0	13	0	0	0	0	0	0	0	0	0	0	0	0	0	0	0	0	0	0	0	0	0	0	0	0	0	0	0	0	0	0	0	0	0	0
OTU_4195	Unassigned	Unassigned	Unassigned	Unassigned	Unassigned	Unassigned	Unassigned	338	13	4.20945e-06	0	0	0	0	1	0	0	0	0	0	0	0	0	0	0	0	0	0	0	0	0	0	0	1	2	0	0	0	0	0	0	0	0	0	0	0	0	9	0
OTU_4248	Unassigned	Unassigned	Unassigned	Unassigned	Unassigned	Unassigned	Unassigned	347	13	4.20945e-06	0	0	0	0	0	0	0	0	0	0	0	0	0	0	0	0	0	0	0	0	0	0	0	0	0	0	0	0	0	0	0	0	0	0	0	0	0	0	0
OTU_4393	Unassigned	Unassigned	Unassigned	Unassigned	Unassigned	Unassigned	Unassigned	463	13	4.20945e-06	0	0	0	0	0	0	0	0	0	0	0	0	0	6	0	0	0	0	0	0	0	0	0	0	0	0	0	0	0	0	0	0	0	0	0	0	0	0	0
OTU_4534	Unassigned	Unassigned	Unassigned	Unassigned	Unassigned	Unassigned	Unassigned	435	13	4.20945e-06	0	0	0	0	0	0	0	0	0	0	0	0	0	0	0	0	0	0	0	0	0	0	0	0	0	0	0	0	0	0	0	0	0	0	0	0	0	0	0
OTU_4703	Unassigned	Unassigned	Unassigned	Unassigned	Unassigned	Unassigned	Unassigned	352	13	4.20945e-06	0	0	2	0	0	0	0	0	0	0	0	0	0	0	0	0	0	0	0	0	0	0	0	0	0	0	0	0	0	0	0	0	0	0	3	0	0	0	0
OTU_4975	Unassigned	Unassigned	Unassigned	Unassigned	Unassigned	Unassigned	Unassigned	346	13	4.20945e-06	0	0	0	0	0	0	0	0	0	0	0	0	0	0	0	0	0	0	0	0	0	0	0	4	0	0	0	0	0	0	0	0	0	0	0	0	1	0	0
OTU_5638	Unassigned	Unassigned	Unassigned	Unassigned	Unassigned	Unassigned	Unassigned	346	13	4.20945e-06	0	0	0	0	0	0	0	0	13	0	0	0	0	0	0	0	0	0	0	0	0	0	0	0	0	0	0	0	0	0	0	0	0	0	0	0	0	0	0
OTU_5650	Unassigned	Unassigned	Unassigned	Unassigned	Unassigned	Unassigned	Unassigned	458	13	4.20945e-06	0	0	3	0	0	0	0	0	0	0	0	0	0	0	0	0	0	0	0	0	0	0	0	0	0	0	0	0	0	0	0	0	0	0	0	0	0	0	0
OTU_5730	Unassigned	Unassigned	Unassigned	Unassigned	Unassigned	Unassigned	Unassigned	348	13	4.20945e-06	0	0	0	0	0	0	0	0	0	0	0	0	0	0	0	0	4	0	0	0	0	0	0	0	0	0	0	0	0	0	0	0	0	1	0	0	0	0	0
OTU_6187	Unassigned	Unassigned	Unassigned	Unassigned	Unassigned	Unassigned	Unassigned	355	13	4.20945e-06	0	0	0	0	0	0	0	0	0	0	0	0	0	0	0	0	0	2	0	0	0	0	0	0	0	0	0	0	0	0	0	0	0	0	0	0	0	0	0
OTU_6428	Unassigned	Unassigned	Unassigned	Unassigned	Unassigned	Unassigned	Unassigned	345	13	4.20945e-06	0	0	0	0	0	0	0	0	0	0	0	0	0	0	0	0	0	0	0	0	0	0	0	0	0	0	1	0	0	0	0	0	0	0	0	0	0	0	0
OTU_6636	Unassigned	Unassigned	Unassigned	Unassigned	Unassigned	Unassigned	Unassigned	354	13	4.20945e-06	0	0	0	0	0	0	0	0	0	0	0	0	0	0	0	0	0	0	0	0	0	0	0	0	0	0	0	0	0	0	0	0	0	0	0	0	0	0	0
OTU_7897	Unassigned	Unassigned	Unassigned	Unassigned	Unassigned	Unassigned	Unassigned	435	13	4.20945e-06	0	0	10	0	0	0	0	0	0	0	0	0	0	0	0	0	0	0	0	0	0	0	0	0	0	0	0	0	0	0	0	0	0	0	0	0	0	0	0
OTU_8846	Unassigned	Unassigned	Unassigned	Unassigned	Unassigned	Unassigned	Unassigned	344	13	4.20945e-06	0	0	2	0	0	0	0	0	0	0	0	0	0	0	0	0	0	0	0	0	0	0	0	3	0	0	0	0	0	0	0	0	0	3	0	0	0	0	0
OTU_2264	Unassigned	Unassigned	Unassigned	Unassigned	Unassigned	Unassigned	Unassigned	423	12	3.88565e-06	12	0	0	0	0	0	0	0	0	0	0	0	0	0	0	0	0	0	0	0	0	0	0	0	0	0	0	0	0	0	0	0	0	0	0	0	0	0	0
OTU_2369	Unassigned	Unassigned	Unassigned	Unassigned	Unassigned	Unassigned	Unassigned	332	12	3.88565e-06	0	0	0	0	0	0	0	0	0	0	0	0	0	0	0	0	0	0	0	0	0	0	0	0	0	0	0	0	0	0	0	0	0	0	0	0	0	0	0
OTU_2407	Unassigned	Unassigned	Unassigned	Unassigned	Unassigned	Unassigned	Unassigned	345	12	3.88565e-06	0	0	0	0	0	0	0	0	0	0	0	0	0	0	0	0	0	0	0	0	0	0	0	0	0	0	0	0	0	0	0	0	0	0	0	0	0	0	0
OTU_2706	Unassigned	Unassigned	Unassigned	Unassigned	Unassigned	Unassigned	Unassigned	345	12	3.88565e-06	0	0	6	0	0	0	0	0	0	0	0	0	0	0	0	0	0	0	0	0	0	0	0	0	0	0	0	0	0	0	0	0	0	0	0	0	3	2	0
OTU_2718	Unassigned	Unassigned	Unassigned	Unassigned	Unassigned	Unassigned	Unassigned	340	12	3.88565e-06	12	0	0	0	0	0	0	0	0	0	0	0	0	0	0	0	0	0	0	0	0	0	0	0	0	0	0	0	0	0	0	0	0	0	0	0	0	0	0
OTU_2822	Unassigned	Unassigned	Unassigned	Unassigned	Unassigned	Unassigned	Unassigned	341	12	3.88565e-06	0	0	0	0	0	0	0	0	0	0	0	0	0	0	0	0	0	0	0	0	0	0	0	0	0	0	0	0	0	0	0	0	0	0	0	0	0	0	0
OTU_2840	Unassigned	Unassigned	Unassigned	Unassigned	Unassigned	Unassigned	Unassigned	403	12	3.88565e-06	0	0	0	0	0	0	0	0	0	0	0	0	0	0	0	0	0	0	0	0	0	0	0	0	0	0	0	0	0	0	0	0	0	0	0	0	0	0	0
OTU_2865	Unassigned	Unassigned	Unassigned	Unassigned	Unassigned	Unassigned	Unassigned	345	12	3.88565e-06	0	0	0	0	0	0	0	0	0	0	0	0	0	0	0	0	0	0	0	0	0	0	0	0	0	0	0	0	0	0	0	0	0	0	11	0	0	0	0
OTU_2895	Unassigned	Unassigned	Unassigned	Unassigned	Unassigned	Unassigned	Unassigned	338	12	3.88565e-06	0	0	0	0	0	0	0	0	0	0	0	0	0	0	0	0	0	0	0	0	0	0	0	0	0	0	0	0	0	0	0	0	0	0	0	0	0	0	0
OTU_2964	Unassigned	Unassigned	Unassigned	Unassigned	Unassigned	Unassigned	Unassigned	345	12	3.88565e-06	0	0	0	0	1	0	0	0	0	0	0	0	0	0	0	0	0	0	0	0	0	0	0	0	0	0	1	0	0	0	0	0	0	0	0	0	0	0	0
OTU_3025	Unassigned	Unassigned	Unassigned	Unassigned	Unassigned	Unassigned	Unassigned	313	12	3.88565e-06	0	0	0	0	0	0	0	0	0	0	0	0	0	0	3	0	0	0	0	0	0	0	0	0	0	0	0	0	0	0	0	0	0	0	0	0	0	0	0
OTU_3071	Unassigned	Unassigned	Unassigned	Unassigned	Unassigned	Unassigned	Unassigned	420	12	3.88565e-06	0	0	12	0	0	0	0	0	0	0	0	0	0	0	0	0	0	0	0	0	0	0	0	0	0	0	0	0	0	0	0	0	0	0	0	0	0	0	0
OTU_3203	Unassigned	Unassigned	Unassigned	Unassigned	Unassigned	Unassigned	Unassigned	333	12	3.88565e-06	0	0	0	0	0	0	0	0	0	0	0	0	0	0	0	0	0	0	0	0	0	0	0	0	0	0	0	0	0	0	0	0	0	0	0	0	0	0	0
OTU_3210	Unassigned	Unassigned	Unassigned	Unassigned	Unassigned	Unassigned	Unassigned	338	12	3.88565e-06	0	0	0	0	0	0	0	11	0	0	0	0	0	0	0	0	0	0	0	0	0	0	0	0	0	0	0	0	0	0	0	0	0	0	0	0	0	0	0
OTU_3403	Unassigned	Unassigned	Unassigned	Unassigned	Unassigned	Unassigned	Unassigned	360	12	3.88565e-06	0	0	0	0	0	0	0	0	0	0	0	0	0	0	0	0	0	0	0	0	0	0	0	0	0	0	0	0	0	0	0	0	0	0	0	0	0	0	0
OTU_3461	Unassigned	Unassigned	Unassigned	Unassigned	Unassigned	Unassigned	Unassigned	349	12	3.88565e-06	0	0	0	0	0	0	0	0	0	0	0	0	0	0	0	0	12	0	0	0	0	0	0	0	0	0	0	0	0	0	0	0	0	0	0	0	0	0	0
OTU_3514	Unassigned	Unassigned	Unassigned	Unassigned	Unassigned	Unassigned	Unassigned	341	12	3.88565e-06	0	0	0	0	0	0	0	0	0	0	0	0	0	0	0	0	0	0	0	0	0	0	0	0	0	0	0	0	0	0	0	0	0	0	0	0	0	0	0
OTU_3590	Unassigned	Unassigned	Unassigned	Unassigned	Unassigned	Unassigned	Unassigned	333	12	3.88565e-06	0	0	0	0	0	0	0	0	0	0	0	0	0	0	0	0	0	0	0	0	0	0	0	0	0	0	0	0	0	0	0	0	0	0	0	4	0	0	0
OTU_3705	Unassigned	Unassigned	Unassigned	Unassigned	Unassigned	Unassigned	Unassigned	358	12	3.88565e-06	0	0	0	0	0	0	0	0	0	0	0	0	0	0	0	0	0	0	0	0	0	0	0	0	0	0	0	0	0	0	0	0	0	0	0	0	0	0	0
OTU_3731	Unassigned	Unassigned	Unassigned	Unassigned	Unassigned	Unassigned	Unassigned	383	12	3.88565e-06	0	0	0	0	0	0	0	0	0	0	0	0	0	0	0	0	0	0	0	0	0	0	0	0	0	0	0	0	0	0	0	0	0	0	0	0	0	0	0
OTU_3741	Unassigned	Unassigned	Unassigned	Unassigned	Unassigned	Unassigned	Unassigned	360	12	3.88565e-06	0	0	0	0	0	0	0	0	0	0	0	0	0	0	0	0	0	0	0	0	0	0	0	0	0	0	0	0	0	0	0	0	0	0	0	0	0	0	0
OTU_3754	Unassigned	Unassigned	Unassigned	Unassigned	Unassigned	Unassigned	Unassigned	331	12	3.88565e-06	0	0	0	0	0	0	0	0	0	0	0	0	0	0	0	0	0	10	0	0	0	0	0	0	0	0	0	0	0	0	0	0	0	0	0	0	0	0	0
OTU_3761	Unassigned	Unassigned	Unassigned	Unassigned	Unassigned	Unassigned	Unassigned	363	12	3.88565e-06	2	0	0	0	0	1	0	0	0	0	0	0	0	0	0	0	0	0	0	0	0	0	0	0	0	0	0	0	0	0	0	3	0	0	0	0	0	0	0
OTU_3773	Unassigned	Unassigned	Unassigned	Unassigned	Unassigned	Unassigned	Unassigned	328	12	3.88565e-06	0	0	0	0	0	0	0	0	0	0	0	0	0	0	0	0	0	0	0	0	0	0	0	0	0	0	0	0	0	0	0	0	0	0	0	0	0	0	0
OTU_3801	Unassigned	Unassigned	Unassigned	Unassigned	Unassigned	Unassigned	Unassigned	351	12	3.88565e-06	0	0	0	0	0	0	0	0	0	0	0	0	0	0	0	0	0	0	0	0	0	0	0	0	0	0	0	0	0	0	0	0	0	0	0	0	0	0	0
OTU_3824	Unassigned	Unassigned	Unassigned	Unassigned	Unassigned	Unassigned	Unassigned	328	12	3.88565e-06	0	0	0	0	0	0	0	0	0	0	0	0	0	0	0	0	0	0	0	0	0	0	0	0	0	0	0	0	0	0	0	4	0	0	0	0	0	0	0
OTU_3894	Unassigned	Unassigned	Unassigned	Unassigned	Unassigned	Unassigned	Unassigned	344	12	3.88565e-06	0	0	0	0	0	0	0	0	0	0	0	0	0	0	0	0	0	0	0	0	0	0	0	0	0	0	0	0	0	0	0	0	0	0	0	0	0	0	0
OTU_3995	Unassigned	Unassigned	Unassigned	Unassigned	Unassigned	Unassigned	Unassigned	339	12	3.88565e-06	0	0	0	0	6	0	0	0	0	0	0	0	0	0	0	0	0	1	0	0	0	0	0	0	0	0	0	0	0	0	0	0	0	0	0	0	0	0	0
OTU_4126	Unassigned	Unassigned	Unassigned	Unassigned	Unassigned	Unassigned	Unassigned	349	12	3.88565e-06	0	0	0	0	0	0	0	0	0	0	0	0	0	0	0	0	0	0	0	0	0	0	0	0	0	0	0	0	0	0	0	0	0	0	12	0	0	0	0
OTU_4289	Unassigned	Unassigned	Unassigned	Unassigned	Unassigned	Unassigned	Unassigned	346	12	3.88565e-06	0	0	0	0	0	0	0	0	0	0	0	0	0	0	0	0	0	0	0	0	0	0	0	0	0	0	0	0	0	0	0	0	0	0	0	0	0	0	0
OTU_4360	Unassigned	Unassigned	Unassigned	Unassigned	Unassigned	Unassigned	Unassigned	334	12	3.88565e-06	0	0	0	0	0	0	0	0	0	0	0	0	0	0	0	0	0	0	0	0	0	0	0	0	0	0	0	0	0	0	0	0	0	0	0	0	2	0	0
OTU_4411	Unassigned	Unassigned	Unassigned	Unassigned	Unassigned	Unassigned	Unassigned	339	12	3.88565e-06	0	0	0	0	0	0	0	0	0	0	0	0	0	0	0	0	0	0	0	0	0	0	4	0	0	0	0	0	0	0	0	0	0	0	0	0	0	0	0
OTU_4453	Unassigned	Unassigned	Unassigned	Unassigned	Unassigned	Unassigned	Unassigned	350	12	3.88565e-06	0	0	0	0	0	0	0	0	0	0	0	0	0	0	0	0	0	0	0	0	0	0	0	0	0	6	0	3	0	0	0	0	0	0	0	0	0	0	0
OTU_4529	Unassigned	Unassigned	Unassigned	Unassigned	Unassigned	Unassigned	Unassigned	416	12	3.88565e-06	0	0	0	0	0	0	0	0	0	0	0	0	0	0	0	0	0	2	0	0	0	0	0	0	0	0	0	0	0	0	0	0	0	0	0	0	2	4	0
OTU_4558	Unassigned	Unassigned	Unassigned	Unassigned	Unassigned	Unassigned	Unassigned	344	12	3.88565e-06	0	0	0	0	0	0	0	0	0	0	0	0	0	0	0	0	4	0	0	0	0	0	0	0	0	0	0	0	0	0	0	0	0	0	0	0	0	0	0
OTU_4629	Unassigned	Unassigned	Unassigned	Unassigned	Unassigned	Unassigned	Unassigned	343	12	3.88565e-06	0	0	0	0	5	0	0	0	0	0	0	0	0	0	0	0	0	1	0	0	0	0	0	0	0	0	0	0	0	0	0	0	0	0	0	0	3	0	0
OTU_4656	Unassigned	Unassigned	Unassigned	Unassigned	Unassigned	Unassigned	Unassigned	354	12	3.88565e-06	0	0	0	0	0	0	0	0	0	0	0	0	0	0	0	0	0	0	0	0	0	0	0	0	0	0	0	0	0	0	0	0	0	0	0	0	0	0	0
OTU_4670	Unassigned	Unassigned	Unassigned	Unassigned	Unassigned	Unassigned	Unassigned	379	12	3.88565e-06	0	0	0	0	0	0	0	8	0	0	0	0	0	0	4	0	0	0	0	0	0	0	0	0	0	0	0	0	0	0	0	0	0	0	0	0	0	0	0
OTU_5106	Unassigned	Unassigned	Unassigned	Unassigned	Unassigned	Unassigned	Unassigned	372	12	3.88565e-06	0	0	0	0	0	0	0	0	0	0	0	0	0	0	0	0	0	0	0	0	0	0	0	6	0	0	0	0	0	0	0	0	0	0	0	0	0	0	0
OTU_5122	Unassigned	Unassigned	Unassigned	Unassigned	Unassigned	Unassigned	Unassigned	356	12	3.88565e-06	0	0	0	0	0	0	0	12	0	0	0	0	0	0	0	0	0	0	0	0	0	0	0	0	0	0	0	0	0	0	0	0	0	0	0	0	0	0	0
OTU_5209	Unassigned	Unassigned	Unassigned	Unassigned	Unassigned	Unassigned	Unassigned	351	12	3.88565e-06	0	0	0	0	0	0	0	0	0	0	0	0	0	0	0	0	0	5	0	0	0	0	0	0	0	0	0	0	0	0	0	0	0	0	0	0	4	0	0
OTU_5482	Unassigned	Unassigned	Unassigned	Unassigned	Unassigned	Unassigned	Unassigned	435	12	3.88565e-06	0	0	0	0	0	0	0	0	0	0	0	0	0	0	0	0	0	0	0	0	0	0	9	0	0	0	0	0	0	0	0	0	0	0	3	0	0	0	0
OTU_5517	Unassigned	Unassigned	Unassigned	Unassigned	Unassigned	Unassigned	Unassigned	341	12	3.88565e-06	0	0	0	0	3	0	0	0	0	0	0	0	0	0	0	0	0	0	0	0	0	0	0	5	0	0	0	0	0	0	0	0	0	0	0	0	0	0	0
OTU_5551	Unassigned	Unassigned	Unassigned	Unassigned	Unassigned	Unassigned	Unassigned	331	12	3.88565e-06	0	0	0	0	0	0	0	0	0	0	0	0	0	0	0	0	0	0	0	0	0	0	0	0	0	0	0	0	0	0	0	0	0	0	0	0	0	0	0
OTU_5595	Unassigned	Unassigned	Unassigned	Unassigned	Unassigned	Unassigned	Unassigned	341	12	3.88565e-06	0	0	0	0	0	0	0	0	0	0	0	0	7	0	0	0	0	0	0	0	0	0	0	0	0	0	0	0	0	0	0	0	0	0	0	0	0	0	0
OTU_5763	Unassigned	Unassigned	Unassigned	Unassigned	Unassigned	Unassigned	Unassigned	344	12	3.88565e-06	0	0	0	0	0	0	0	0	0	0	0	0	0	0	0	0	0	0	0	0	0	0	0	9	0	0	0	0	0	0	0	0	0	0	0	0	0	0	0
OTU_5880	Unassigned	Unassigned	Unassigned	Unassigned	Unassigned	Unassigned	Unassigned	340	12	3.88565e-06	0	0	0	0	0	0	0	0	0	0	0	0	0	0	0	0	0	0	0	0	0	0	0	0	0	0	0	0	0	0	0	0	0	0	0	0	0	0	0
OTU_5921	Unassigned	Unassigned	Unassigned	Unassigned	Unassigned	Unassigned	Unassigned	353	12	3.88565e-06	0	0	0	0	0	0	0	0	0	0	0	0	0	0	0	0	0	0	0	0	0	0	0	0	0	0	0	0	0	0	0	0	0	0	0	0	0	0	0
OTU_6041	Unassigned	Unassigned	Unassigned	Unassigned	Unassigned	Unassigned	Unassigned	339	12	3.88565e-06	0	0	0	0	3	0	0	0	0	0	0	0	0	0	0	0	0	2	0	0	0	0	0	0	4	0	0	0	0	0	0	0	0	0	0	0	0	0	0
OTU_6333	Unassigned	Unassigned	Unassigned	Unassigned	Unassigned	Unassigned	Unassigned	341	12	3.88565e-06	0	0	0	0	0	0	0	0	0	0	0	0	0	0	0	0	0	0	0	0	0	0	0	0	0	0	0	0	0	0	0	0	0	0	0	0	0	0	0
OTU_6592	Unassigned	Unassigned	Unassigned	Unassigned	Unassigned	Unassigned	Unassigned	345	12	3.88565e-06	0	0	0	0	0	0	0	0	0	0	0	0	0	0	0	0	0	0	0	0	0	0	1	0	0	0	0	0	0	0	0	0	0	0	0	0	0	0	0
OTU_6859	Unassigned	Unassigned	Unassigned	Unassigned	Unassigned	Unassigned	Unassigned	323	12	3.88565e-06	0	0	0	0	0	0	0	0	0	0	0	0	0	0	0	0	0	0	0	0	0	0	0	0	0	0	0	0	0	0	0	0	0	0	0	0	0	0	0
OTU_6906	Unassigned	Unassigned	Unassigned	Unassigned	Unassigned	Unassigned	Unassigned	344	12	3.88565e-06	0	0	0	0	0	0	0	0	0	0	0	0	0	0	0	0	0	0	0	0	0	0	0	0	0	0	0	0	0	0	0	0	0	0	0	0	0	0	0
OTU_7189	Unassigned	Unassigned	Unassigned	Unassigned	Unassigned	Unassigned	Unassigned	331	12	3.88565e-06	0	0	0	0	0	0	0	0	0	0	0	0	0	0	0	0	0	0	0	0	0	0	0	0	0	0	0	0	0	0	0	0	0	0	0	0	0	0	0
OTU_7192	Unassigned	Unassigned	Unassigned	Unassigned	Unassigned	Unassigned	Unassigned	328	12	3.88565e-06	0	0	0	0	0	0	0	0	0	0	0	0	0	0	0	0	0	0	0	0	0	0	3	0	0	0	0	0	0	0	0	1	0	0	0	0	0	0	0
OTU_7421	Unassigned	Unassigned	Unassigned	Unassigned	Unassigned	Unassigned	Unassigned	333	12	3.88565e-06	0	0	0	0	0	0	0	0	0	0	0	0	0	0	0	0	0	0	0	0	0	0	0	0	0	0	0	0	0	0	0	0	0	0	0	0	0	0	0
OTU_7830	Unassigned	Unassigned	Unassigned	Unassigned	Unassigned	Unassigned	Unassigned	331	12	3.88565e-06	0	0	0	0	0	0	0	0	0	0	0	0	0	0	0	0	0	0	0	0	0	0	0	0	0	0	0	0	0	0	0	0	0	0	0	3	0	0	0
OTU_8412	Unassigned	Unassigned	Unassigned	Unassigned	Unassigned	Unassigned	Unassigned	335	12	3.88565e-06	0	0	0	0	0	0	0	0	12	0	0	0	0	0	0	0	0	0	0	0	0	0	0	0	0	0	0	0	0	0	0	0	0	0	0	0	0	0	0
OTU_8712	Unassigned	Unassigned	Unassigned	Unassigned	Unassigned	Unassigned	Unassigned	361	12	3.88565e-06	0	0	0	0	0	0	0	0	0	0	0	0	0	0	0	0	0	0	0	0	0	0	0	3	2	0	0	0	0	0	0	0	0	0	0	0	0	0	0
OTU_8844	Unassigned	Unassigned	Unassigned	Unassigned	Unassigned	Unassigned	Unassigned	439	12	3.88565e-06	0	0	2	0	0	0	0	0	0	0	0	0	0	0	0	0	0	0	0	0	0	0	0	0	2	0	0	0	3	0	0	0	0	0	0	0	2	0	0
OTU_8884	Unassigned	Unassigned	Unassigned	Unassigned	Unassigned	Unassigned	Unassigned	338	12	3.88565e-06	0	0	0	0	0	0	0	0	0	0	0	0	0	0	0	0	0	0	0	0	0	0	0	0	0	0	8	0	0	0	0	0	0	0	0	0	0	0	0
OTU_2353	Unassigned	Unassigned	Unassigned	Unassigned	Unassigned	Unassigned	Unassigned	351	11	3.56184e-06	0	0	0	0	0	0	0	0	0	0	0	0	0	0	0	0	0	0	0	0	0	0	0	0	0	0	0	0	0	0	0	0	0	0	0	0	0	0	0
OTU_2675	Unassigned	Unassigned	Unassigned	Unassigned	Unassigned	Unassigned	Unassigned	352	11	3.56184e-06	0	0	0	0	0	0	0	0	0	0	0	0	0	0	0	0	0	0	0	0	0	0	0	0	0	0	0	0	0	0	0	0	0	0	0	9	0	0	0
OTU_2760	Unassigned	Unassigned	Unassigned	Unassigned	Unassigned	Unassigned	Unassigned	343	11	3.56184e-06	11	0	0	0	0	0	0	0	0	0	0	0	0	0	0	0	0	0	0	0	0	0	0	0	0	0	0	0	0	0	0	0	0	0	0	0	0	0	0
OTU_2794	Unassigned	Unassigned	Unassigned	Unassigned	Unassigned	Unassigned	Unassigned	339	11	3.56184e-06	0	0	0	0	0	0	0	0	0	0	0	0	0	0	0	0	0	0	0	0	0	0	0	0	0	0	0	0	0	0	0	0	0	0	0	0	0	0	0
OTU_3013	Unassigned	Unassigned	Unassigned	Unassigned	Unassigned	Unassigned	Unassigned	350	11	3.56184e-06	0	0	0	0	0	0	0	0	0	0	0	0	0	0	0	0	0	0	0	0	0	0	0	0	0	0	0	0	0	0	0	0	0	0	0	0	0	11	0
OTU_3170	Unassigned	Unassigned	Unassigned	Unassigned	Unassigned	Unassigned	Unassigned	335	11	3.56184e-06	0	0	0	0	0	0	0	0	0	0	0	0	0	0	0	0	0	0	0	0	0	0	0	0	0	0	0	0	0	0	0	0	0	0	0	0	0	0	0
OTU_3294	Unassigned	Unassigned	Unassigned	Unassigned	Unassigned	Unassigned	Unassigned	356	11	3.56184e-06	0	0	0	0	0	0	0	0	0	0	0	0	0	0	0	0	0	0	0	0	0	0	0	0	0	0	0	0	0	0	0	0	0	0	0	0	0	0	2
OTU_3356	Unassigned	Unassigned	Unassigned	Unassigned	Unassigned	Unassigned	Unassigned	465	11	3.56184e-06	0	0	0	0	0	0	0	0	0	0	0	0	0	0	0	0	0	0	0	0	0	0	0	0	0	0	0	0	0	0	0	0	0	0	0	0	0	0	0
OTU_3357	Unassigned	Unassigned	Unassigned	Unassigned	Unassigned	Unassigned	Unassigned	334	11	3.56184e-06	0	0	0	0	0	0	2	0	0	0	0	0	0	0	0	0	0	0	0	0	0	0	0	0	0	0	0	0	0	6	3	0	0	0	0	0	0	0	0
OTU_3432	Unassigned	Unassigned	Unassigned	Unassigned	Unassigned	Unassigned	Unassigned	342	11	3.56184e-06	0	0	0	0	0	0	0	0	11	0	0	0	0	0	0	0	0	0	0	0	0	0	0	0	0	0	0	0	0	0	0	0	0	0	0	0	0	0	0
OTU_3444	Unassigned	Unassigned	Unassigned	Unassigned	Unassigned	Unassigned	Unassigned	380	11	3.56184e-06	0	0	0	0	0	0	0	0	0	0	0	0	0	0	0	0	0	0	0	0	0	0	0	0	0	0	0	0	0	0	0	0	0	0	0	0	0	0	0
OTU_3552	Unassigned	Unassigned	Unassigned	Unassigned	Unassigned	Unassigned	Unassigned	333	11	3.56184e-06	0	0	0	0	0	0	0	0	0	0	0	0	0	0	0	0	0	0	0	0	0	0	0	0	0	0	0	0	0	0	0	0	0	0	0	0	0	0	0
OTU_3772	Unassigned	Unassigned	Unassigned	Unassigned	Unassigned	Unassigned	Unassigned	343	11	3.56184e-06	0	0	0	0	0	0	0	0	0	0	0	0	0	0	0	0	0	0	0	0	0	0	0	0	0	0	0	0	0	0	0	0	0	0	0	0	0	0	0
OTU_3830	Unassigned	Unassigned	Unassigned	Unassigned	Unassigned	Unassigned	Unassigned	342	11	3.56184e-06	0	0	0	0	0	0	0	0	0	0	0	0	0	0	0	0	0	0	0	0	0	0	0	0	0	0	0	0	0	0	0	0	0	0	0	0	0	0	0
OTU_3843	Unassigned	Unassigned	Unassigned	Unassigned	Unassigned	Unassigned	Unassigned	344	11	3.56184e-06	0	0	0	0	0	0	0	0	0	0	0	0	0	0	0	0	0	0	0	0	0	0	0	3	0	0	0	0	0	0	0	0	0	0	0	0	5	0	0
OTU_3915	Unassigned	Unassigned	Unassigned	Unassigned	Unassigned	Unassigned	Unassigned	335	11	3.56184e-06	0	0	0	0	0	0	0	0	0	0	0	0	0	0	0	0	0	10	0	0	0	0	0	0	0	0	0	0	0	0	0	0	0	0	0	0	0	0	0
OTU_4000	Unassigned	Unassigned	Unassigned	Unassigned	Unassigned	Unassigned	Unassigned	418	11	3.56184e-06	0	0	0	0	0	0	0	0	0	11	0	0	0	0	0	0	0	0	0	0	0	0	0	0	0	0	0	0	0	0	0	0	0	0	0	0	0	0	0
OTU_4359	Unassigned	Unassigned	Unassigned	Unassigned	Unassigned	Unassigned	Unassigned	435	11	3.56184e-06	0	0	0	11	0	0	0	0	0	0	0	0	0	0	0	0	0	0	0	0	0	0	0	0	0	0	0	0	0	0	0	0	0	0	0	0	0	0	0
OTU_4363	Unassigned	Unassigned	Unassigned	Unassigned	Unassigned	Unassigned	Unassigned	339	11	3.56184e-06	0	0	0	0	0	0	0	0	0	0	0	0	0	0	0	0	0	0	0	0	0	0	11	0	0	0	0	0	0	0	0	0	0	0	0	0	0	0	0
OTU_4610	Unassigned	Unassigned	Unassigned	Unassigned	Unassigned	Unassigned	Unassigned	346	11	3.56184e-06	0	0	0	0	0	0	0	0	0	0	0	0	0	0	0	0	0	0	0	0	0	0	0	0	0	0	0	0	0	0	0	0	0	0	0	0	0	0	0
OTU_4637	Unassigned	Unassigned	Unassigned	Unassigned	Unassigned	Unassigned	Unassigned	348	11	3.56184e-06	0	0	0	0	0	0	0	0	0	0	0	0	0	0	0	0	0	0	0	0	0	0	0	0	0	0	0	0	0	0	0	0	0	0	0	0	0	4	0
OTU_4876	Unassigned	Unassigned	Unassigned	Unassigned	Unassigned	Unassigned	Unassigned	335	11	3.56184e-06	0	0	0	0	0	0	0	0	11	0	0	0	0	0	0	0	0	0	0	0	0	0	0	0	0	0	0	0	0	0	0	0	0	0	0	0	0	0	0
OTU_4970	Unassigned	Unassigned	Unassigned	Unassigned	Unassigned	Unassigned	Unassigned	334	11	3.56184e-06	0	0	0	0	0	0	0	0	2	0	0	0	0	0	0	0	0	0	0	0	0	0	0	0	0	0	0	0	0	5	0	0	0	0	0	0	0	0	0
OTU_5128	Unassigned	Unassigned	Unassigned	Unassigned	Unassigned	Unassigned	Unassigned	337	11	3.56184e-06	0	0	0	0	0	0	0	0	0	0	0	0	0	0	0	0	0	0	0	0	0	0	6	0	0	0	0	0	0	0	0	0	0	0	0	0	0	0	0
OTU_5346	Unassigned	Unassigned	Unassigned	Unassigned	Unassigned	Unassigned	Unassigned	325	11	3.56184e-06	0	0	0	0	0	0	0	0	0	0	0	0	0	0	0	0	0	0	0	0	0	0	0	0	0	0	0	0	0	0	0	0	0	0	0	0	0	0	0
OTU_5421	Unassigned	Unassigned	Unassigned	Unassigned	Unassigned	Unassigned	Unassigned	337	11	3.56184e-06	0	0	0	0	0	0	0	0	11	0	0	0	0	0	0	0	0	0	0	0	0	0	0	0	0	0	0	0	0	0	0	0	0	0	0	0	0	0	0
OTU_5440	Unassigned	Unassigned	Unassigned	Unassigned	Unassigned	Unassigned	Unassigned	360	11	3.56184e-06	0	0	0	0	1	0	0	0	2	0	0	0	0	0	0	0	0	0	0	0	0	0	0	0	0	0	0	0	0	0	0	0	0	0	0	0	0	0	0
OTU_5674	Unassigned	Unassigned	Unassigned	Unassigned	Unassigned	Unassigned	Unassigned	323	11	3.56184e-06	0	0	0	0	0	1	0	0	0	0	0	0	0	0	0	0	0	0	0	0	0	0	0	0	0	0	0	0	2	0	0	0	0	0	0	0	0	0	0
OTU_5740	Unassigned	Unassigned	Unassigned	Unassigned	Unassigned	Unassigned	Unassigned	357	11	3.56184e-06	0	0	0	0	0	0	0	0	0	0	0	0	0	0	0	0	0	0	0	0	0	0	0	0	0	0	0	0	0	0	0	0	0	0	0	0	4	0	0
OTU_5766	Unassigned	Unassigned	Unassigned	Unassigned	Unassigned	Unassigned	Unassigned	348	11	3.56184e-06	7	0	0	0	0	0	0	0	0	0	0	0	0	0	0	0	0	0	0	0	2	0	0	0	0	0	0	0	0	0	0	0	0	0	0	2	0	0	0
OTU_6028	Unassigned	Unassigned	Unassigned	Unassigned	Unassigned	Unassigned	Unassigned	333	11	3.56184e-06	0	0	0	0	0	0	0	0	0	0	0	0	0	0	0	0	0	0	0	0	0	0	0	1	0	0	0	0	0	0	0	0	0	0	0	0	0	0	0
OTU_6484	Unassigned	Unassigned	Unassigned	Unassigned	Unassigned	Unassigned	Unassigned	451	11	3.56184e-06	0	0	0	0	9	0	0	0	0	0	0	0	0	0	0	0	0	0	0	0	0	0	0	0	0	0	0	0	2	0	0	0	0	0	0	0	0	0	0
OTU_7579	Unassigned	Unassigned	Unassigned	Unassigned	Unassigned	Unassigned	Unassigned	381	11	3.56184e-06	0	0	0	0	0	0	0	0	0	0	0	0	0	0	0	0	1	0	0	0	0	0	0	0	0	0	0	0	0	0	0	0	0	0	0	0	0	0	0
OTU_7756	Unassigned	Unassigned	Unassigned	Unassigned	Unassigned	Unassigned	Unassigned	346	11	3.56184e-06	0	0	0	0	0	0	0	0	0	0	0	0	0	0	0	0	0	0	0	0	0	0	0	1	0	0	0	0	0	0	0	0	0	0	0	0	0	0	0
OTU_7977	Unassigned	Unassigned	Unassigned	Unassigned	Unassigned	Unassigned	Unassigned	333	11	3.56184e-06	0	0	0	0	0	0	0	0	0	0	0	0	0	0	0	0	0	0	0	0	0	0	0	2	2	0	0	0	0	0	0	0	0	0	0	0	0	0	0
OTU_7978	Unassigned	Unassigned	Unassigned	Unassigned	Unassigned	Unassigned	Unassigned	362	11	3.56184e-06	0	0	0	0	0	0	0	0	6	0	0	0	0	0	0	0	0	0	0	0	0	0	1	0	0	0	0	0	3	0	0	0	0	0	0	0	0	0	0
OTU_8089	Unassigned	Unassigned	Unassigned	Unassigned	Unassigned	Unassigned	Unassigned	343	11	3.56184e-06	0	0	0	0	0	0	0	0	0	0	0	0	0	0	0	0	0	4	0	0	0	0	0	0	0	0	0	0	0	0	0	0	0	0	0	0	7	0	0
OTU_8371	Unassigned	Unassigned	Unassigned	Unassigned	Unassigned	Unassigned	Unassigned	364	11	3.56184e-06	0	0	0	0	0	0	0	0	11	0	0	0	0	0	0	0	0	0	0	0	0	0	0	0	0	0	0	0	0	0	0	0	0	0	0	0	0	0	0
OTU_8618	Unassigned	Unassigned	Unassigned	Unassigned	Unassigned	Unassigned	Unassigned	336	11	3.56184e-06	0	0	0	0	0	0	0	0	0	0	0	0	0	0	0	0	0	0	0	2	0	0	0	0	0	0	0	0	0	0	0	0	0	0	0	0	0	0	0
OTU_8664	Unassigned	Unassigned	Unassigned	Unassigned	Unassigned	Unassigned	Unassigned	364	11	3.56184e-06	0	0	0	0	0	0	0	0	0	0	0	0	0	1	0	0	0	0	0	0	0	0	0	0	0	0	7	0	0	0	0	0	0	0	0	0	0	0	0
OTU_8758	Unassigned	Unassigned	Unassigned	Unassigned	Unassigned	Unassigned	Unassigned	340	11	3.56184e-06	0	0	0	0	0	1	5	0	0	0	0	0	0	3	0	0	0	0	0	0	0	0	0	0	0	0	0	0	0	0	0	0	0	0	0	0	0	0	0
OTU_8798	Unassigned	Unassigned	Unassigned	Unassigned	Unassigned	Unassigned	Unassigned	387	11	3.56184e-06	6	0	0	0	0	0	0	0	0	0	0	0	0	0	0	0	0	0	0	0	0	0	0	0	0	0	0	0	0	0	0	0	0	0	0	0	0	0	0
OTU_2629	Unassigned	Unassigned	Unassigned	Unassigned	Unassigned	Unassigned	Unassigned	270	10	3.23804e-06	0	0	0	0	0	0	0	0	0	0	0	0	0	0	0	0	0	0	0	0	0	0	0	0	0	0	0	0	0	0	0	0	0	0	0	0	0	0	0
OTU_2703	Unassigned	Unassigned	Unassigned	Unassigned	Unassigned	Unassigned	Unassigned	374	10	3.23804e-06	0	0	0	0	0	0	0	0	0	0	0	0	0	0	10	0	0	0	0	0	0	0	0	0	0	0	0	0	0	0	0	0	0	0	0	0	0	0	0
OTU_2862	Unassigned	Unassigned	Unassigned	Unassigned	Unassigned	Unassigned	Unassigned	353	10	3.23804e-06	0	0	0	0	0	0	0	0	0	0	0	0	0	0	0	0	0	0	0	0	0	0	0	0	0	0	0	0	0	0	0	0	0	0	10	0	0	0	0
OTU_2905	Unassigned	Unassigned	Unassigned	Unassigned	Unassigned	Unassigned	Unassigned	324	10	3.23804e-06	0	0	0	0	0	0	0	0	0	0	0	0	0	0	0	0	10	0	0	0	0	0	0	0	0	0	0	0	0	0	0	0	0	0	0	0	0	0	0
OTU_2947	Unassigned	Unassigned	Unassigned	Unassigned	Unassigned	Unassigned	Unassigned	365	10	3.23804e-06	0	0	0	0	0	0	0	0	0	0	0	0	0	0	0	0	0	0	0	0	0	0	0	0	0	0	0	0	0	0	0	0	0	0	0	0	0	0	0
OTU_3127	Unassigned	Unassigned	Unassigned	Unassigned	Unassigned	Unassigned	Unassigned	336	10	3.23804e-06	0	0	0	0	0	0	0	0	0	0	0	0	0	0	0	0	0	0	0	0	3	0	0	0	0	0	0	0	0	0	0	0	0	0	0	0	0	0	0
OTU_3182	Unassigned	Unassigned	Unassigned	Unassigned	Unassigned	Unassigned	Unassigned	335	10	3.23804e-06	0	0	0	0	0	0	0	0	0	0	0	0	0	0	0	0	0	0	0	0	0	0	0	0	0	0	0	0	0	0	0	0	0	0	0	0	0	10	0
OTU_3212	Unassigned	Unassigned	Unassigned	Unassigned	Unassigned	Unassigned	Unassigned	358	10	3.23804e-06	0	0	0	0	0	0	1	0	0	0	0	0	0	0	0	0	0	0	0	0	0	0	0	0	0	0	0	0	0	0	0	0	0	0	0	0	0	0	0
OTU_3223	Unassigned	Unassigned	Unassigned	Unassigned	Unassigned	Unassigned	Unassigned	349	10	3.23804e-06	0	0	0	0	0	0	0	0	0	0	0	0	0	0	0	0	0	0	0	0	0	0	0	0	0	0	0	0	0	0	0	0	0	0	0	0	0	6	0
OTU_3370	Unassigned	Unassigned	Unassigned	Unassigned	Unassigned	Unassigned	Unassigned	356	10	3.23804e-06	0	0	0	0	0	0	0	0	0	0	0	0	0	0	0	0	0	0	0	1	0	0	0	0	0	0	0	0	0	0	0	0	0	0	0	0	2	7	0
OTU_3426	Unassigned	Unassigned	Unassigned	Unassigned	Unassigned	Unassigned	Unassigned	352	10	3.23804e-06	0	0	0	0	0	0	0	0	0	0	0	0	0	0	0	0	0	0	0	0	0	0	0	0	0	0	0	0	0	0	0	0	0	0	0	0	0	0	0
OTU_3464	Unassigned	Unassigned	Unassigned	Unassigned	Unassigned	Unassigned	Unassigned	327	10	3.23804e-06	0	0	0	0	0	0	0	0	0	0	0	0	0	0	0	0	0	0	0	0	0	0	0	0	0	0	0	0	0	0	0	0	0	0	0	0	0	0	0
OTU_3470	Unassigned	Unassigned	Unassigned	Unassigned	Unassigned	Unassigned	Unassigned	340	10	3.23804e-06	0	0	0	0	0	0	0	0	0	0	0	0	0	0	0	0	0	0	0	0	0	0	0	0	0	0	0	0	0	0	0	0	0	0	0	0	0	0	0
OTU_3521	Unassigned	Unassigned	Unassigned	Unassigned	Unassigned	Unassigned	Unassigned	339	10	3.23804e-06	0	0	0	0	0	0	0	0	0	0	0	0	0	0	0	0	0	0	0	3	0	0	0	0	0	0	0	0	0	0	0	0	0	0	0	0	0	0	3
OTU_3539	Unassigned	Unassigned	Unassigned	Unassigned	Unassigned	Unassigned	Unassigned	356	10	3.23804e-06	0	0	0	0	0	0	0	0	0	0	0	0	0	0	0	0	0	0	0	0	0	0	0	0	0	0	0	0	0	0	0	0	0	0	0	0	0	0	0
OTU_3649	Unassigned	Unassigned	Unassigned	Unassigned	Unassigned	Unassigned	Unassigned	419	10	3.23804e-06	0	0	0	3	0	0	0	0	0	0	0	0	0	0	0	0	0	0	0	0	0	0	0	0	0	0	0	0	0	0	0	0	0	0	0	0	0	0	0
OTU_3659	Unassigned	Unassigned	Unassigned	Unassigned	Unassigned	Unassigned	Unassigned	337	10	3.23804e-06	0	0	0	0	0	0	0	0	0	0	0	0	0	0	0	0	0	0	0	0	0	0	0	0	0	0	0	0	0	0	0	0	0	0	0	0	0	0	0
OTU_3878	Unassigned	Unassigned	Unassigned	Unassigned	Unassigned	Unassigned	Unassigned	358	10	3.23804e-06	0	0	0	0	0	0	0	0	0	0	0	0	0	0	0	0	0	0	0	0	10	0	0	0	0	0	0	0	0	0	0	0	0	0	0	0	0	0	0
OTU_3879	Unassigned	Unassigned	Unassigned	Unassigned	Unassigned	Unassigned	Unassigned	364	10	3.23804e-06	0	0	0	0	0	0	0	0	0	0	0	0	0	0	0	0	0	0	0	0	0	0	0	0	0	0	0	0	0	0	0	0	0	0	0	0	0	0	0
OTU_3892	Unassigned	Unassigned	Unassigned	Unassigned	Unassigned	Unassigned	Unassigned	351	10	3.23804e-06	0	0	0	0	0	0	0	0	0	0	0	0	0	0	0	0	0	0	0	0	0	0	0	0	0	0	0	0	0	0	0	0	0	0	0	0	0	0	0
OTU_3900	Unassigned	Unassigned	Unassigned	Unassigned	Unassigned	Unassigned	Unassigned	345	10	3.23804e-06	0	0	0	0	0	0	0	0	0	0	0	0	0	0	0	0	0	0	0	0	0	0	0	0	0	0	0	0	0	0	0	0	0	0	0	0	0	0	0
OTU_3955	Unassigned	Unassigned	Unassigned	Unassigned	Unassigned	Unassigned	Unassigned	301	10	3.23804e-06	0	0	0	0	0	4	4	0	0	0	0	0	0	0	0	0	0	0	0	0	0	0	0	0	0	0	0	0	0	0	0	0	0	0	0	0	0	0	0
OTU_4014	Unassigned	Unassigned	Unassigned	Unassigned	Unassigned	Unassigned	Unassigned	336	10	3.23804e-06	0	0	0	0	0	0	0	0	0	0	0	0	0	0	0	0	0	0	0	0	0	0	0	0	0	0	0	0	0	0	0	0	0	0	0	0	0	0	0
OTU_4141	Unassigned	Unassigned	Unassigned	Unassigned	Unassigned	Unassigned	Unassigned	344	10	3.23804e-06	0	0	0	0	0	0	0	0	0	0	0	0	0	0	0	0	1	0	0	0	0	0	0	0	0	0	0	0	0	0	0	0	0	2	0	0	0	0	0
OTU_4175	Unassigned	Unassigned	Unassigned	Unassigned	Unassigned	Unassigned	Unassigned	331	10	3.23804e-06	0	0	0	0	0	0	0	0	0	0	0	0	0	0	0	0	0	0	0	0	1	0	0	0	0	0	0	0	0	0	0	0	0	0	0	0	0	0	2
OTU_4188	Unassigned	Unassigned	Unassigned	Unassigned	Unassigned	Unassigned	Unassigned	363	10	3.23804e-06	0	0	0	0	0	0	0	0	0	0	0	0	0	0	0	0	0	0	0	0	0	0	0	0	0	1	0	0	0	0	0	0	0	0	0	0	7	0	0
OTU_4206	Unassigned	Unassigned	Unassigned	Unassigned	Unassigned	Unassigned	Unassigned	342	10	3.23804e-06	0	0	0	0	0	0	0	0	10	0	0	0	0	0	0	0	0	0	0	0	0	0	0	0	0	0	0	0	0	0	0	0	0	0	0	0	0	0	0
OTU_4309	Unassigned	Unassigned	Unassigned	Unassigned	Unassigned	Unassigned	Unassigned	338	10	3.23804e-06	0	0	0	0	0	0	0	0	0	0	0	0	0	0	0	0	0	0	0	0	0	0	0	0	0	0	0	0	4	0	0	0	0	0	0	0	0	6	0
OTU_4674	Unassigned	Unassigned	Unassigned	Unassigned	Unassigned	Unassigned	Unassigned	343	10	3.23804e-06	0	0	0	0	0	0	0	0	0	0	0	0	0	0	0	0	0	0	0	0	0	0	0	0	0	0	0	0	0	0	0	0	0	0	0	0	0	0	0
OTU_4724	Unassigned	Unassigned	Unassigned	Unassigned	Unassigned	Unassigned	Unassigned	341	10	3.23804e-06	0	0	0	0	0	0	0	0	0	0	0	0	0	0	0	0	10	0	0	0	0	0	0	0	0	0	0	0	0	0	0	0	0	0	0	0	0	0	0
OTU_5047	Unassigned	Unassigned	Unassigned	Unassigned	Unassigned	Unassigned	Unassigned	364	10	3.23804e-06	0	0	0	0	0	0	0	0	0	0	0	0	0	0	0	0	0	0	0	0	0	0	0	0	0	0	0	0	0	0	0	0	0	0	0	0	0	0	0
OTU_5204	Unassigned	Unassigned	Unassigned	Unassigned	Unassigned	Unassigned	Unassigned	361	10	3.23804e-06	0	0	0	0	0	0	0	0	0	0	0	0	0	0	0	0	0	0	0	0	0	0	0	4	0	0	0	0	2	0	0	0	0	0	0	0	0	0	0
OTU_5287	Unassigned	Unassigned	Unassigned	Unassigned	Unassigned	Unassigned	Unassigned	361	10	3.23804e-06	0	0	0	0	0	0	0	0	0	0	0	0	0	0	0	0	0	0	0	0	0	0	4	2	0	0	0	0	0	0	0	0	0	0	0	0	0	0	0
OTU_5318	Unassigned	Unassigned	Unassigned	Unassigned	Unassigned	Unassigned	Unassigned	334	10	3.23804e-06	0	0	0	0	0	0	0	0	0	0	0	0	0	0	0	0	0	0	0	0	0	0	0	0	0	0	0	0	0	0	0	5	0	0	0	0	0	0	0
OTU_5810	Unassigned	Unassigned	Unassigned	Unassigned	Unassigned	Unassigned	Unassigned	334	10	3.23804e-06	0	0	0	0	3	0	0	0	0	0	0	0	0	0	0	0	0	3	0	0	0	0	0	0	0	0	0	0	0	0	0	0	0	0	0	0	2	0	0
OTU_6117	Unassigned	Unassigned	Unassigned	Unassigned	Unassigned	Unassigned	Unassigned	355	10	3.23804e-06	0	0	0	0	0	0	0	0	0	0	0	0	0	0	0	0	1	0	0	0	0	0	0	0	0	0	0	0	0	0	0	0	0	0	0	0	2	0	0
OTU_6180	Unassigned	Unassigned	Unassigned	Unassigned	Unassigned	Unassigned	Unassigned	359	10	3.23804e-06	0	0	0	0	0	0	0	0	0	0	0	0	0	0	0	0	0	0	0	0	0	0	0	0	0	0	0	0	0	0	0	0	0	0	0	0	0	0	0
OTU_6824	Unassigned	Unassigned	Unassigned	Unassigned	Unassigned	Unassigned	Unassigned	420	10	3.23804e-06	0	0	0	0	0	0	0	0	0	0	0	0	0	0	0	0	0	0	0	0	0	0	0	0	0	1	0	0	0	0	0	0	0	0	0	0	0	0	0
OTU_6836	Unassigned	Unassigned	Unassigned	Unassigned	Unassigned	Unassigned	Unassigned	359	10	3.23804e-06	0	0	0	0	0	0	0	0	0	0	0	0	0	0	0	0	0	0	0	0	0	0	0	0	0	0	0	0	0	0	0	0	0	0	0	0	0	0	0
OTU_7667	Unassigned	Unassigned	Unassigned	Unassigned	Unassigned	Unassigned	Unassigned	334	10	3.23804e-06	0	0	0	0	0	1	0	0	0	0	0	0	0	0	0	0	0	2	0	0	0	0	0	0	0	0	0	0	0	0	0	0	0	0	0	4	0	0	0
OTU_7683	Unassigned	Unassigned	Unassigned	Unassigned	Unassigned	Unassigned	Unassigned	453	10	3.23804e-06	0	0	0	0	0	0	0	0	0	0	0	0	0	0	0	0	0	0	0	0	0	0	0	0	0	0	0	0	4	0	0	0	0	0	0	0	4	0	0
OTU_8357	Unassigned	Unassigned	Unassigned	Unassigned	Unassigned	Unassigned	Unassigned	315	10	3.23804e-06	0	0	0	0	0	0	0	0	2	0	0	0	0	0	0	1	0	0	0	0	0	0	0	0	0	0	3	0	0	0	0	0	0	0	0	0	0	0	0
OTU_8726	Unassigned	Unassigned	Unassigned	Unassigned	Unassigned	Unassigned	Unassigned	477	10	3.23804e-06	0	0	0	0	0	0	0	0	0	0	0	0	10	0	0	0	0	0	0	0	0	0	0	0	0	0	0	0	0	0	0	0	0	0	0	0	0	0	0
OTU_8791	Unassigned	Unassigned	Unassigned	Unassigned	Unassigned	Unassigned	Unassigned	358	10	3.23804e-06	0	0	0	0	0	0	0	0	0	0	0	0	0	0	10	0	0	0	0	0	0	0	0	0	0	0	0	0	0	0	0	0	0	0	0	0	0	0	0
OTU_2603	Unassigned	Unassigned	Unassigned	Unassigned	Unassigned	Unassigned	Unassigned	348	9	2.91424e-06	0	0	0	0	0	0	0	0	0	0	0	0	0	0	0	0	0	0	0	0	0	0	6	0	0	0	0	0	0	0	0	0	0	0	0	0	0	0	0
OTU_2705	Unassigned	Unassigned	Unassigned	Unassigned	Unassigned	Unassigned	Unassigned	346	9	2.91424e-06	0	0	0	0	0	0	0	0	0	0	0	0	0	0	0	0	0	0	0	0	0	0	0	0	0	0	0	0	0	0	0	0	0	0	0	0	0	0	0
OTU_2765	Unassigned	Unassigned	Unassigned	Unassigned	Unassigned	Unassigned	Unassigned	412	9	2.91424e-06	0	0	0	0	0	0	0	0	0	0	0	0	0	0	0	0	0	0	0	0	0	0	0	0	0	0	0	0	0	0	0	0	0	0	0	0	0	0	0
OTU_3099	Unassigned	Unassigned	Unassigned	Unassigned	Unassigned	Unassigned	Unassigned	347	9	2.91424e-06	0	0	0	0	0	0	0	0	0	0	0	0	0	0	0	0	0	0	0	0	0	0	0	0	0	0	0	0	0	0	0	0	0	0	0	0	0	0	0
OTU_3128	Unassigned	Unassigned	Unassigned	Unassigned	Unassigned	Unassigned	Unassigned	288	9	2.91424e-06	0	0	0	0	0	0	0	0	0	0	0	0	0	0	0	0	0	0	0	0	0	0	0	0	0	0	0	0	0	0	0	9	0	0	0	0	0	0	0
OTU_3152	Unassigned	Unassigned	Unassigned	Unassigned	Unassigned	Unassigned	Unassigned	365	9	2.91424e-06	0	0	0	0	0	0	0	0	0	0	0	0	0	0	0	0	0	0	0	0	0	0	0	0	0	0	0	0	0	0	0	0	0	0	0	0	0	0	0
OTU_3162	Unassigned	Unassigned	Unassigned	Unassigned	Unassigned	Unassigned	Unassigned	358	9	2.91424e-06	0	0	0	0	0	0	0	0	0	0	0	0	0	0	0	0	0	0	0	0	0	0	0	0	0	0	0	0	0	0	0	0	0	0	0	0	0	0	0
OTU_3176	Unassigned	Unassigned	Unassigned	Unassigned	Unassigned	Unassigned	Unassigned	345	9	2.91424e-06	0	0	0	0	0	0	0	0	0	0	0	0	0	0	0	0	0	0	0	0	0	0	0	0	0	0	0	0	0	0	0	0	0	0	0	0	0	0	0
OTU_3347	Unassigned	Unassigned	Unassigned	Unassigned	Unassigned	Unassigned	Unassigned	398	9	2.91424e-06	0	0	0	0	0	0	0	0	0	0	0	0	0	0	0	0	0	0	0	0	0	0	0	0	0	0	0	0	0	0	0	0	0	0	9	0	0	0	0
OTU_3430	Unassigned	Unassigned	Unassigned	Unassigned	Unassigned	Unassigned	Unassigned	345	9	2.91424e-06	0	0	0	0	0	0	0	0	0	0	0	0	0	0	0	0	0	0	0	0	0	0	0	0	0	0	0	0	0	0	0	0	0	0	9	0	0	0	0
OTU_3536	Unassigned	Unassigned	Unassigned	Unassigned	Unassigned	Unassigned	Unassigned	338	9	2.91424e-06	0	0	0	0	0	0	0	0	0	0	0	0	0	0	0	0	0	0	0	0	0	0	0	0	0	0	0	0	0	0	0	0	0	0	0	0	0	0	0
OTU_3566	Unassigned	Unassigned	Unassigned	Unassigned	Unassigned	Unassigned	Unassigned	332	9	2.91424e-06	0	0	0	0	0	0	0	0	0	0	0	0	0	0	0	0	0	0	0	0	0	0	0	0	0	0	0	0	0	0	0	0	0	0	0	0	0	0	0
OTU_3587	Unassigned	Unassigned	Unassigned	Unassigned	Unassigned	Unassigned	Unassigned	363	9	2.91424e-06	0	0	0	0	0	0	0	0	0	0	0	0	9	0	0	0	0	0	0	0	0	0	0	0	0	0	0	0	0	0	0	0	0	0	0	0	0	0	0
OTU_3597	Unassigned	Unassigned	Unassigned	Unassigned	Unassigned	Unassigned	Unassigned	343	9	2.91424e-06	0	0	0	0	0	0	0	0	0	0	0	0	0	0	0	0	0	0	0	0	0	0	0	0	0	0	0	0	0	0	0	0	0	0	0	0	0	0	0
OTU_3620	Unassigned	Unassigned	Unassigned	Unassigned	Unassigned	Unassigned	Unassigned	364	9	2.91424e-06	0	0	0	0	0	0	0	0	0	0	0	0	0	0	0	0	0	0	0	0	0	0	0	0	0	0	0	0	0	0	0	0	0	0	0	0	0	0	0
OTU_3646	Unassigned	Unassigned	Unassigned	Unassigned	Unassigned	Unassigned	Unassigned	377	9	2.91424e-06	0	0	0	0	0	0	0	0	0	0	0	0	0	0	0	0	0	0	0	0	0	0	0	0	0	0	0	0	0	0	0	0	0	0	0	0	0	0	0
OTU_3673	Unassigned	Unassigned	Unassigned	Unassigned	Unassigned	Unassigned	Unassigned	337	9	2.91424e-06	0	0	0	0	0	0	0	0	0	0	0	0	0	0	0	0	0	0	0	7	2	0	0	0	0	0	0	0	0	0	0	0	0	0	0	0	0	0	0
OTU_3763	Unassigned	Unassigned	Unassigned	Unassigned	Unassigned	Unassigned	Unassigned	341	9	2.91424e-06	0	0	0	0	0	0	0	0	0	0	0	0	0	0	0	0	0	0	0	0	0	0	0	0	0	0	0	0	0	0	0	0	0	0	0	0	0	0	0
OTU_3834	Unassigned	Unassigned	Unassigned	Unassigned	Unassigned	Unassigned	Unassigned	352	9	2.91424e-06	0	0	0	0	0	0	0	0	0	0	0	0	0	0	0	0	0	0	0	0	0	0	0	0	0	0	0	0	0	0	0	0	0	0	0	0	0	0	0
OTU_3838	Unassigned	Unassigned	Unassigned	Unassigned	Unassigned	Unassigned	Unassigned	340	9	2.91424e-06	0	0	0	0	0	0	2	0	0	0	0	0	0	0	0	0	0	0	0	0	0	0	0	0	0	0	0	0	0	0	0	0	0	0	0	0	0	0	0
OTU_3845	Unassigned	Unassigned	Unassigned	Unassigned	Unassigned	Unassigned	Unassigned	335	9	2.91424e-06	0	0	0	0	0	0	0	0	0	0	0	0	0	0	0	0	0	0	0	0	0	0	0	0	0	0	0	0	9	0	0	0	0	0	0	0	0	0	0
OTU_3920	Unassigned	Unassigned	Unassigned	Unassigned	Unassigned	Unassigned	Unassigned	451	9	2.91424e-06	0	0	0	0	0	0	0	0	0	0	0	0	0	0	0	0	0	0	0	0	0	0	0	0	0	0	0	0	0	0	0	9	0	0	0	0	0	0	0
OTU_3929	Unassigned	Unassigned	Unassigned	Unassigned	Unassigned	Unassigned	Unassigned	353	9	2.91424e-06	0	0	0	0	0	0	0	0	0	0	0	0	0	0	0	0	0	0	0	0	0	0	0	0	0	0	0	0	0	0	0	0	0	0	0	0	0	0	0
OTU_4006	Unassigned	Unassigned	Unassigned	Unassigned	Unassigned	Unassigned	Unassigned	284	9	2.91424e-06	0	0	0	0	0	0	0	0	0	0	0	0	0	0	0	0	0	0	0	0	0	0	0	0	0	0	0	0	0	0	0	4	0	0	5	0	0	0	0
OTU_4017	Unassigned	Unassigned	Unassigned	Unassigned	Unassigned	Unassigned	Unassigned	345	9	2.91424e-06	0	0	2	0	6	0	0	0	0	0	0	0	0	0	0	0	0	0	0	0	0	0	0	0	0	0	0	0	1	0	0	0	0	0	0	0	0	0	0
OTU_4154	Unassigned	Unassigned	Unassigned	Unassigned	Unassigned	Unassigned	Unassigned	351	9	2.91424e-06	0	0	0	0	0	0	0	0	0	0	0	0	0	0	0	0	0	0	0	0	0	0	0	0	0	0	0	0	0	0	0	0	0	0	0	0	0	0	0
OTU_4273	Unassigned	Unassigned	Unassigned	Unassigned	Unassigned	Unassigned	Unassigned	483	9	2.91424e-06	0	0	0	0	0	0	0	0	0	0	0	0	0	0	0	0	0	0	0	0	0	0	0	0	0	0	0	0	0	0	0	0	0	0	0	0	0	0	0
OTU_4294	Unassigned	Unassigned	Unassigned	Unassigned	Unassigned	Unassigned	Unassigned	358	9	2.91424e-06	0	0	0	0	0	0	0	0	0	0	0	0	0	0	0	0	0	0	0	0	0	0	0	0	0	0	0	0	0	0	0	0	0	0	0	0	0	0	0
OTU_4319	Unassigned	Unassigned	Unassigned	Unassigned	Unassigned	Unassigned	Unassigned	352	9	2.91424e-06	0	0	0	0	0	0	0	0	0	0	0	0	0	0	0	0	0	0	0	0	0	0	0	0	0	0	0	0	0	0	0	0	0	0	1	0	0	0	0
OTU_4369	Unassigned	Unassigned	Unassigned	Unassigned	Unassigned	Unassigned	Unassigned	435	9	2.91424e-06	0	0	0	0	0	0	0	0	0	0	0	0	0	0	0	0	0	0	0	0	0	0	0	5	0	0	0	0	0	0	0	0	0	0	0	0	0	4	0
OTU_4373	Unassigned	Unassigned	Unassigned	Unassigned	Unassigned	Unassigned	Unassigned	350	9	2.91424e-06	0	0	0	0	0	0	0	0	0	0	0	0	0	0	0	0	0	0	0	0	0	0	7	0	0	0	0	0	0	0	0	0	0	0	0	0	0	0	0
OTU_4477	Unassigned	Unassigned	Unassigned	Unassigned	Unassigned	Unassigned	Unassigned	335	9	2.91424e-06	0	0	0	0	0	0	2	0	0	0	0	0	0	0	0	0	0	0	0	0	0	0	0	0	0	0	0	0	0	0	0	0	0	0	0	0	0	0	0
OTU_4705	Unassigned	Unassigned	Unassigned	Unassigned	Unassigned	Unassigned	Unassigned	337	9	2.91424e-06	0	0	0	0	0	0	0	0	0	0	0	0	0	0	0	0	0	0	0	0	0	0	0	0	0	0	0	0	0	0	0	0	0	0	0	0	0	0	0
OTU_4732	Unassigned	Unassigned	Unassigned	Unassigned	Unassigned	Unassigned	Unassigned	437	9	2.91424e-06	0	0	0	0	0	0	0	0	2	0	0	0	0	0	0	0	0	0	0	0	0	0	0	0	0	0	0	0	0	0	0	0	7	0	0	0	0	0	0
OTU_4872	Unassigned	Unassigned	Unassigned	Unassigned	Unassigned	Unassigned	Unassigned	341	9	2.91424e-06	0	0	0	0	0	0	0	0	0	0	0	0	0	0	0	0	0	0	0	0	0	0	0	0	0	0	0	0	0	0	0	0	0	0	0	0	0	0	0
OTU_4880	Unassigned	Unassigned	Unassigned	Unassigned	Unassigned	Unassigned	Unassigned	339	9	2.91424e-06	0	0	0	9	0	0	0	0	0	0	0	0	0	0	0	0	0	0	0	0	0	0	0	0	0	0	0	0	0	0	0	0	0	0	0	0	0	0	0
OTU_4911	Unassigned	Unassigned	Unassigned	Unassigned	Unassigned	Unassigned	Unassigned	390	9	2.91424e-06	0	0	0	0	0	0	0	0	0	0	0	0	0	0	0	0	0	0	0	0	0	0	0	0	0	0	0	0	0	0	0	0	0	0	0	0	0	0	0
OTU_5043	Unassigned	Unassigned	Unassigned	Unassigned	Unassigned	Unassigned	Unassigned	368	9	2.91424e-06	0	0	0	0	0	0	0	0	0	0	0	0	0	0	0	0	9	0	0	0	0	0	0	0	0	0	0	0	0	0	0	0	0	0	0	0	0	0	0
OTU_5080	Unassigned	Unassigned	Unassigned	Unassigned	Unassigned	Unassigned	Unassigned	328	9	2.91424e-06	0	0	0	0	0	0	0	0	0	0	0	0	0	0	0	0	0	0	0	0	0	0	0	0	0	0	0	0	0	0	0	2	0	0	0	0	0	0	0
OTU_5082	Unassigned	Unassigned	Unassigned	Unassigned	Unassigned	Unassigned	Unassigned	345	9	2.91424e-06	0	0	0	0	0	0	0	0	0	0	0	0	0	0	0	0	0	9	0	0	0	0	0	0	0	0	0	0	0	0	0	0	0	0	0	0	0	0	0
OTU_5175	Unassigned	Unassigned	Unassigned	Unassigned	Unassigned	Unassigned	Unassigned	337	9	2.91424e-06	0	0	0	0	0	0	0	0	0	0	0	0	0	0	0	0	0	4	0	0	0	0	0	2	0	0	0	0	0	0	0	0	0	0	0	0	0	0	0
OTU_5436	Unassigned	Unassigned	Unassigned	Unassigned	Unassigned	Unassigned	Unassigned	344	9	2.91424e-06	0	0	0	0	0	0	0	0	0	0	0	0	0	0	0	0	0	0	0	0	0	0	0	0	0	0	0	0	0	0	0	0	0	0	0	0	0	0	0
OTU_5487	Unassigned	Unassigned	Unassigned	Unassigned	Unassigned	Unassigned	Unassigned	333	9	2.91424e-06	0	0	0	0	0	0	0	0	0	0	0	0	0	0	0	0	0	0	0	0	0	0	0	0	0	0	0	0	0	0	0	0	0	0	0	0	0	0	0
OTU_5496	Unassigned	Unassigned	Unassigned	Unassigned	Unassigned	Unassigned	Unassigned	337	9	2.91424e-06	0	0	0	0	0	0	0	0	0	0	0	0	0	0	0	0	0	0	0	0	0	0	0	0	0	0	0	0	0	0	0	0	0	0	0	0	0	0	0
OTU_5549	Unassigned	Unassigned	Unassigned	Unassigned	Unassigned	Unassigned	Unassigned	332	9	2.91424e-06	0	0	0	0	0	0	0	0	0	0	0	0	0	0	0	0	0	0	0	0	0	0	0	0	0	0	0	0	0	0	0	0	0	0	0	0	0	0	0
OTU_5590	Unassigned	Unassigned	Unassigned	Unassigned	Unassigned	Unassigned	Unassigned	332	9	2.91424e-06	0	0	0	0	0	0	0	0	0	0	0	0	0	0	0	0	0	0	0	0	0	0	0	0	0	0	0	0	0	0	0	0	0	0	0	0	0	4	0
OTU_5677	Unassigned	Unassigned	Unassigned	Unassigned	Unassigned	Unassigned	Unassigned	440	9	2.91424e-06	0	0	1	2	0	0	0	0	0	0	0	0	0	0	0	0	0	0	0	0	2	0	0	2	0	0	0	0	0	0	0	0	0	0	0	0	0	0	0
OTU_5853	Unassigned	Unassigned	Unassigned	Unassigned	Unassigned	Unassigned	Unassigned	330	9	2.91424e-06	0	0	0	0	0	0	0	0	0	0	0	0	0	0	0	0	0	0	0	0	0	0	0	0	0	0	0	0	0	0	0	0	0	0	0	0	0	0	0
OTU_5960	Unassigned	Unassigned	Unassigned	Unassigned	Unassigned	Unassigned	Unassigned	352	9	2.91424e-06	0	0	0	0	0	0	0	0	0	0	0	0	0	0	0	0	0	0	0	0	0	0	0	0	0	0	0	0	0	0	0	0	0	0	0	0	0	0	0
OTU_6148	Unassigned	Unassigned	Unassigned	Unassigned	Unassigned	Unassigned	Unassigned	358	9	2.91424e-06	0	0	0	0	0	0	0	0	0	0	0	0	0	9	0	0	0	0	0	0	0	0	0	0	0	0	0	0	0	0	0	0	0	0	0	0	0	0	0
OTU_6262	Unassigned	Unassigned	Unassigned	Unassigned	Unassigned	Unassigned	Unassigned	325	9	2.91424e-06	0	0	0	0	0	0	0	0	0	0	0	0	0	0	0	0	0	0	0	0	0	0	0	0	0	0	0	0	0	0	0	0	0	0	0	0	0	0	0
OTU_6300	Unassigned	Unassigned	Unassigned	Unassigned	Unassigned	Unassigned	Unassigned	380	9	2.91424e-06	0	0	0	0	0	0	0	0	0	0	0	0	0	0	0	0	0	0	0	0	0	0	0	0	0	0	0	0	0	0	0	0	0	0	0	0	0	0	0
OTU_6301	Unassigned	Unassigned	Unassigned	Unassigned	Unassigned	Unassigned	Unassigned	340	9	2.91424e-06	0	0	0	0	0	0	0	0	0	0	0	0	0	0	0	0	0	0	0	0	0	0	0	0	0	0	0	0	0	0	0	0	0	0	0	0	0	0	0
OTU_6393	Unassigned	Unassigned	Unassigned	Unassigned	Unassigned	Unassigned	Unassigned	346	9	2.91424e-06	0	0	0	4	2	0	0	0	0	0	0	0	0	0	0	0	0	0	0	0	0	0	0	0	0	0	0	1	0	0	0	0	0	0	0	0	0	0	0
OTU_6510	Unassigned	Unassigned	Unassigned	Unassigned	Unassigned	Unassigned	Unassigned	340	9	2.91424e-06	0	0	0	0	0	0	0	0	0	0	0	0	0	0	0	0	0	0	0	0	0	0	0	0	0	0	0	0	0	0	0	0	0	0	0	0	0	0	0
OTU_6519	Unassigned	Unassigned	Unassigned	Unassigned	Unassigned	Unassigned	Unassigned	395	9	2.91424e-06	0	0	0	0	0	0	0	0	9	0	0	0	0	0	0	0	0	0	0	0	0	0	0	0	0	0	0	0	0	0	0	0	0	0	0	0	0	0	0
OTU_6690	Unassigned	Unassigned	Unassigned	Unassigned	Unassigned	Unassigned	Unassigned	424	9	2.91424e-06	0	0	0	0	0	0	0	0	0	0	0	0	0	0	0	0	0	0	0	0	0	0	0	0	0	0	0	0	0	0	0	0	0	0	0	0	0	0	4
OTU_6903	Unassigned	Unassigned	Unassigned	Unassigned	Unassigned	Unassigned	Unassigned	351	9	2.91424e-06	0	0	0	0	0	0	0	0	0	0	0	0	0	0	0	0	3	0	0	0	0	0	0	0	0	0	0	0	0	0	0	0	0	0	0	0	0	0	0
OTU_6973	Unassigned	Unassigned	Unassigned	Unassigned	Unassigned	Unassigned	Unassigned	432	9	2.91424e-06	0	0	0	0	0	0	0	0	0	0	0	0	0	0	0	0	0	2	0	0	0	0	0	7	0	0	0	0	0	0	0	0	0	0	0	0	0	0	0
OTU_6978	Unassigned	Unassigned	Unassigned	Unassigned	Unassigned	Unassigned	Unassigned	318	9	2.91424e-06	0	0	0	0	0	0	0	0	0	0	0	0	0	0	0	0	0	0	0	0	0	0	0	0	0	0	0	0	0	0	0	0	0	0	0	0	0	0	0
OTU_7116	Unassigned	Unassigned	Unassigned	Unassigned	Unassigned	Unassigned	Unassigned	440	9	2.91424e-06	0	0	0	0	0	0	0	0	0	0	0	0	0	0	0	0	0	0	0	0	0	0	0	0	0	0	0	0	0	0	0	0	0	0	0	0	0	0	0
OTU_7142	Unassigned	Unassigned	Unassigned	Unassigned	Unassigned	Unassigned	Unassigned	358	9	2.91424e-06	0	0	0	0	0	0	0	0	0	3	0	0	0	0	0	0	0	0	0	0	0	0	0	0	0	0	0	0	0	0	0	0	0	0	0	0	0	0	0
OTU_7188	Unassigned	Unassigned	Unassigned	Unassigned	Unassigned	Unassigned	Unassigned	456	9	2.91424e-06	0	0	0	0	0	0	0	0	0	0	0	0	0	0	0	0	0	0	0	0	0	0	0	0	0	0	0	0	0	0	0	0	0	0	0	0	0	0	0
OTU_7581	Unassigned	Unassigned	Unassigned	Unassigned	Unassigned	Unassigned	Unassigned	422	9	2.91424e-06	0	0	0	0	0	0	0	0	0	0	0	0	0	0	0	0	0	0	0	0	0	0	0	0	0	0	0	0	0	0	0	0	0	0	0	0	0	0	0
OTU_7674	Unassigned	Unassigned	Unassigned	Unassigned	Unassigned	Unassigned	Unassigned	317	9	2.91424e-06	0	0	0	0	0	0	0	0	0	0	0	0	0	0	0	0	0	0	0	0	0	0	0	0	0	0	0	0	0	0	0	0	0	0	0	0	0	0	0
OTU_7895	Unassigned	Unassigned	Unassigned	Unassigned	Unassigned	Unassigned	Unassigned	335	9	2.91424e-06	0	0	0	0	0	0	0	0	0	0	0	0	0	0	0	0	0	0	0	0	0	0	0	0	0	0	0	0	0	0	0	0	0	0	0	0	0	0	0
OTU_8062	Unassigned	Unassigned	Unassigned	Unassigned	Unassigned	Unassigned	Unassigned	331	9	2.91424e-06	0	0	0	0	2	0	0	0	0	0	0	0	0	0	0	0	0	0	0	0	0	0	0	3	0	0	0	3	1	0	0	0	0	0	0	0	0	0	0
OTU_8499	Unassigned	Unassigned	Unassigned	Unassigned	Unassigned	Unassigned	Unassigned	452	9	2.91424e-06	0	0	0	0	0	0	0	0	0	0	0	0	0	0	0	0	0	0	0	0	0	0	2	0	0	0	3	0	0	0	0	0	0	0	0	0	0	0	0
OTU_8741	Unassigned	Unassigned	Unassigned	Unassigned	Unassigned	Unassigned	Unassigned	333	9	2.91424e-06	0	0	0	0	3	0	0	0	0	0	0	0	0	0	0	0	0	0	0	0	0	0	0	0	0	0	0	0	0	0	0	0	0	0	0	0	0	0	0
OTU_8831	Unassigned	Unassigned	Unassigned	Unassigned	Unassigned	Unassigned	Unassigned	340	9	2.91424e-06	0	0	0	0	0	0	0	0	0	0	0	0	0	0	0	0	0	0	0	0	0	0	0	0	0	0	0	0	0	0	0	0	0	0	0	0	0	0	0
OTU_3183	Unassigned	Unassigned	Unassigned	Unassigned	Unassigned	Unassigned	Unassigned	330	8	2.59043e-06	0	0	0	0	0	0	0	0	0	0	0	0	0	0	0	0	0	0	0	0	0	0	0	0	0	0	0	0	0	0	0	0	0	0	0	0	0	0	0
OTU_3191	Unassigned	Unassigned	Unassigned	Unassigned	Unassigned	Unassigned	Unassigned	342	8	2.59043e-06	0	0	0	0	0	0	0	0	0	0	0	0	0	0	0	0	0	0	0	0	0	0	0	0	0	0	0	0	0	0	0	0	0	0	0	0	0	0	0
OTU_3225	Unassigned	Unassigned	Unassigned	Unassigned	Unassigned	Unassigned	Unassigned	317	8	2.59043e-06	0	0	0	0	0	0	0	0	0	0	0	0	0	0	0	0	0	0	0	0	0	0	0	0	0	4	0	0	0	0	0	0	0	0	0	0	0	0	0
OTU_3235	Unassigned	Unassigned	Unassigned	Unassigned	Unassigned	Unassigned	Unassigned	343	8	2.59043e-06	0	0	0	0	0	0	0	0	0	0	0	0	0	0	0	0	0	0	0	0	0	0	0	0	0	0	0	0	0	0	0	0	0	0	0	0	0	0	0
OTU_3304	Unassigned	Unassigned	Unassigned	Unassigned	Unassigned	Unassigned	Unassigned	345	8	2.59043e-06	0	0	0	0	0	0	0	0	0	0	0	0	0	0	0	0	0	0	0	0	0	0	0	0	0	0	0	0	0	0	0	0	0	0	0	0	0	0	0
OTU_3366	Unassigned	Unassigned	Unassigned	Unassigned	Unassigned	Unassigned	Unassigned	335	8	2.59043e-06	0	0	0	0	0	0	0	0	0	0	0	0	0	0	0	0	0	0	0	0	0	0	0	0	0	0	0	0	0	0	0	0	0	0	0	0	0	0	0
OTU_3383	Unassigned	Unassigned	Unassigned	Unassigned	Unassigned	Unassigned	Unassigned	344	8	2.59043e-06	0	0	0	0	0	0	0	0	0	0	0	0	0	0	0	0	0	0	0	0	0	0	0	0	0	0	0	0	0	0	0	0	0	0	0	0	0	0	0
OTU_3478	Unassigned	Unassigned	Unassigned	Unassigned	Unassigned	Unassigned	Unassigned	328	8	2.59043e-06	0	0	0	0	0	0	0	0	0	0	0	0	0	0	0	0	0	0	0	0	0	8	0	0	0	0	0	0	0	0	0	0	0	0	0	0	0	0	0
OTU_3492	Unassigned	Unassigned	Unassigned	Unassigned	Unassigned	Unassigned	Unassigned	335	8	2.59043e-06	0	0	0	0	0	0	0	0	0	0	0	0	0	0	0	0	0	0	0	0	0	0	0	0	0	0	0	0	0	0	0	0	0	0	0	0	0	0	0
OTU_3537	Unassigned	Unassigned	Unassigned	Unassigned	Unassigned	Unassigned	Unassigned	349	8	2.59043e-06	0	0	0	0	0	0	0	0	0	0	0	0	0	0	0	0	3	0	0	0	0	0	0	0	0	0	0	0	0	0	0	0	0	0	0	0	0	5	0
OTU_3595	Unassigned	Unassigned	Unassigned	Unassigned	Unassigned	Unassigned	Unassigned	358	8	2.59043e-06	0	0	0	0	0	0	0	0	0	0	0	0	0	0	0	0	0	0	0	0	0	0	0	0	0	0	0	0	0	0	0	0	0	0	0	0	0	0	0
OTU_3600	Unassigned	Unassigned	Unassigned	Unassigned	Unassigned	Unassigned	Unassigned	333	8	2.59043e-06	0	0	0	0	0	0	0	0	0	0	8	0	0	0	0	0	0	0	0	0	0	0	0	0	0	0	0	0	0	0	0	0	0	0	0	0	0	0	0
OTU_3624	Unassigned	Unassigned	Unassigned	Unassigned	Unassigned	Unassigned	Unassigned	356	8	2.59043e-06	0	0	0	0	0	0	0	0	0	0	0	0	0	0	0	0	8	0	0	0	0	0	0	0	0	0	0	0	0	0	0	0	0	0	0	0	0	0	0
OTU_3693	Unassigned	Unassigned	Unassigned	Unassigned	Unassigned	Unassigned	Unassigned	334	8	2.59043e-06	0	0	0	0	0	0	0	0	0	0	0	0	0	0	0	0	0	0	0	0	0	0	0	0	0	0	0	0	0	0	0	0	0	0	0	0	0	0	0
OTU_3816	Unassigned	Unassigned	Unassigned	Unassigned	Unassigned	Unassigned	Unassigned	337	8	2.59043e-06	0	0	0	0	0	0	0	0	0	0	0	0	0	0	0	0	0	0	0	0	0	0	0	0	0	0	0	0	0	0	0	0	0	0	0	0	0	0	0
OTU_3831	Unassigned	Unassigned	Unassigned	Unassigned	Unassigned	Unassigned	Unassigned	432	8	2.59043e-06	0	0	0	0	0	0	0	0	0	0	0	0	0	0	0	0	0	8	0	0	0	0	0	0	0	0	0	0	0	0	0	0	0	0	0	0	0	0	0
OTU_3902	Unassigned	Unassigned	Unassigned	Unassigned	Unassigned	Unassigned	Unassigned	354	8	2.59043e-06	0	0	0	0	0	0	0	0	0	0	0	0	0	0	0	0	0	0	0	0	0	0	0	0	0	0	0	0	0	0	0	0	0	0	0	0	0	0	0
OTU_3967	Unassigned	Unassigned	Unassigned	Unassigned	Unassigned	Unassigned	Unassigned	341	8	2.59043e-06	0	0	0	0	0	0	0	0	0	0	0	0	0	0	0	0	0	0	0	0	0	0	0	0	0	0	0	0	0	0	0	0	0	0	0	0	3	5	0
OTU_3972	Unassigned	Unassigned	Unassigned	Unassigned	Unassigned	Unassigned	Unassigned	345	8	2.59043e-06	0	0	0	0	0	0	0	0	0	0	0	0	0	0	0	0	0	0	0	0	0	0	0	0	0	0	0	0	0	0	0	0	0	8	0	0	0	0	0
OTU_4004	Unassigned	Unassigned	Unassigned	Unassigned	Unassigned	Unassigned	Unassigned	452	8	2.59043e-06	0	0	7	0	0	0	0	0	0	0	0	0	0	0	0	0	0	0	0	0	0	0	0	0	0	0	0	0	0	0	0	0	0	0	0	0	0	0	0
OTU_4056	Unassigned	Unassigned	Unassigned	Unassigned	Unassigned	Unassigned	Unassigned	340	8	2.59043e-06	0	0	0	0	0	0	0	0	0	0	0	0	0	0	0	0	0	0	0	0	0	0	0	0	0	0	0	0	0	0	0	0	0	0	0	0	1	0	0
OTU_4191	Unassigned	Unassigned	Unassigned	Unassigned	Unassigned	Unassigned	Unassigned	345	8	2.59043e-06	0	0	0	0	0	0	0	0	0	0	0	0	0	0	0	0	0	0	0	0	0	0	0	0	0	0	0	0	0	0	0	0	0	0	0	0	0	0	0
OTU_4261	Unassigned	Unassigned	Unassigned	Unassigned	Unassigned	Unassigned	Unassigned	353	8	2.59043e-06	0	0	0	0	0	0	0	0	0	0	0	0	0	0	0	0	0	0	0	0	0	0	0	0	0	0	0	0	0	0	0	0	0	0	0	0	0	0	0
OTU_4299	Unassigned	Unassigned	Unassigned	Unassigned	Unassigned	Unassigned	Unassigned	453	8	2.59043e-06	0	0	0	0	0	0	0	0	3	0	0	0	0	0	0	0	0	0	0	0	0	0	0	0	0	0	0	0	0	0	0	0	0	0	5	0	0	0	0
OTU_4389	Unassigned	Unassigned	Unassigned	Unassigned	Unassigned	Unassigned	Unassigned	343	8	2.59043e-06	8	0	0	0	0	0	0	0	0	0	0	0	0	0	0	0	0	0	0	0	0	0	0	0	0	0	0	0	0	0	0	0	0	0	0	0	0	0	0
OTU_4394	Unassigned	Unassigned	Unassigned	Unassigned	Unassigned	Unassigned	Unassigned	329	8	2.59043e-06	0	0	0	0	0	0	0	0	0	0	0	0	0	0	0	0	0	0	0	0	0	0	0	0	0	0	0	0	0	0	0	0	0	0	0	0	0	4	0
OTU_4505	Unassigned	Unassigned	Unassigned	Unassigned	Unassigned	Unassigned	Unassigned	363	8	2.59043e-06	0	0	0	0	0	0	0	0	0	0	0	0	0	0	0	0	0	0	0	0	0	0	0	0	0	0	0	0	0	8	0	0	0	0	0	0	0	0	0
OTU_4510	Unassigned	Unassigned	Unassigned	Unassigned	Unassigned	Unassigned	Unassigned	419	8	2.59043e-06	0	0	0	0	0	0	0	0	0	0	0	0	0	0	0	0	0	0	0	0	0	0	0	0	0	0	0	0	0	0	0	0	0	0	0	0	8	0	0
OTU_4564	Unassigned	Unassigned	Unassigned	Unassigned	Unassigned	Unassigned	Unassigned	342	8	2.59043e-06	0	0	0	0	0	0	0	0	0	0	0	0	0	0	0	0	0	0	0	0	8	0	0	0	0	0	0	0	0	0	0	0	0	0	0	0	0	0	0
OTU_4614	Unassigned	Unassigned	Unassigned	Unassigned	Unassigned	Unassigned	Unassigned	345	8	2.59043e-06	0	0	0	0	0	0	0	0	0	0	0	0	0	0	0	0	0	0	0	0	0	0	0	0	0	0	0	0	0	0	0	0	0	0	0	0	0	0	0
OTU_4717	Unassigned	Unassigned	Unassigned	Unassigned	Unassigned	Unassigned	Unassigned	340	8	2.59043e-06	0	0	0	0	0	0	3	0	0	0	0	0	0	0	0	0	0	0	0	0	0	0	0	0	0	0	0	0	0	0	0	0	0	0	0	0	0	0	0
OTU_4726	Unassigned	Unassigned	Unassigned	Unassigned	Unassigned	Unassigned	Unassigned	340	8	2.59043e-06	0	0	0	0	0	0	0	0	0	0	0	0	0	0	0	0	0	0	0	0	0	0	0	0	0	0	0	0	0	0	0	0	0	0	0	0	0	0	0
OTU_4798	Unassigned	Unassigned	Unassigned	Unassigned	Unassigned	Unassigned	Unassigned	367	8	2.59043e-06	0	0	0	0	0	0	0	0	0	0	0	0	0	0	0	0	0	0	0	0	0	0	0	0	0	0	0	0	0	0	0	4	0	0	0	0	0	0	0
OTU_4868	Unassigned	Unassigned	Unassigned	Unassigned	Unassigned	Unassigned	Unassigned	422	8	2.59043e-06	0	0	0	0	0	0	0	0	0	0	0	0	0	0	0	0	0	0	0	0	0	0	0	0	0	0	0	0	0	0	0	0	0	0	0	0	0	0	0
OTU_4899	Unassigned	Unassigned	Unassigned	Unassigned	Unassigned	Unassigned	Unassigned	360	8	2.59043e-06	0	0	0	0	0	0	0	0	0	0	0	0	0	0	0	0	0	0	0	0	0	0	0	0	0	0	0	0	0	0	0	0	0	0	0	0	0	0	0
OTU_4952	Unassigned	Unassigned	Unassigned	Unassigned	Unassigned	Unassigned	Unassigned	341	8	2.59043e-06	0	0	2	0	0	0	0	0	0	0	0	0	0	0	0	0	0	6	0	0	0	0	0	0	0	0	0	0	0	0	0	0	0	0	0	0	0	0	0
OTU_5125	Unassigned	Unassigned	Unassigned	Unassigned	Unassigned	Unassigned	Unassigned	322	8	2.59043e-06	0	0	0	0	0	0	0	0	0	0	0	0	0	0	0	0	0	0	0	0	0	0	0	0	0	0	0	0	0	0	0	0	0	0	0	8	0	0	0
OTU_5327	Unassigned	Unassigned	Unassigned	Unassigned	Unassigned	Unassigned	Unassigned	455	8	2.59043e-06	0	0	0	0	0	0	0	0	0	0	0	0	0	0	0	0	0	0	0	0	0	0	0	0	0	0	0	0	0	0	0	0	0	0	0	0	3	0	0
OTU_5364	Unassigned	Unassigned	Unassigned	Unassigned	Unassigned	Unassigned	Unassigned	333	8	2.59043e-06	0	0	0	0	0	0	0	0	0	0	0	1	0	0	0	0	0	0	0	0	0	0	0	0	0	0	0	0	0	0	0	3	0	0	0	0	0	0	0
OTU_5387	Unassigned	Unassigned	Unassigned	Unassigned	Unassigned	Unassigned	Unassigned	428	8	2.59043e-06	0	0	0	0	0	0	0	0	0	0	0	0	0	0	0	0	0	0	0	0	0	0	0	0	0	0	0	0	0	0	0	0	0	0	0	0	0	8	0
OTU_5420	Unassigned	Unassigned	Unassigned	Unassigned	Unassigned	Unassigned	Unassigned	343	8	2.59043e-06	0	0	0	0	0	0	0	0	0	0	0	0	0	0	0	0	0	0	0	0	0	0	0	0	0	0	0	0	0	0	0	0	0	0	0	0	0	2	0
OTU_5546	Unassigned	Unassigned	Unassigned	Unassigned	Unassigned	Unassigned	Unassigned	331	8	2.59043e-06	0	0	0	0	0	0	0	0	0	0	0	0	0	0	0	0	0	0	0	0	0	0	0	0	0	0	0	0	0	0	0	0	0	0	0	0	0	0	0
OTU_5584	Unassigned	Unassigned	Unassigned	Unassigned	Unassigned	Unassigned	Unassigned	351	8	2.59043e-06	0	0	0	0	0	0	0	0	0	0	0	0	0	0	0	0	0	0	0	0	0	0	0	0	0	0	0	0	4	0	0	0	0	0	0	0	0	0	0
OTU_5589	Unassigned	Unassigned	Unassigned	Unassigned	Unassigned	Unassigned	Unassigned	328	8	2.59043e-06	0	0	0	0	0	0	0	0	0	0	0	0	0	0	0	0	0	0	0	0	0	0	0	0	0	0	0	0	0	0	0	0	0	0	0	0	0	0	0
OTU_5597	Unassigned	Unassigned	Unassigned	Unassigned	Unassigned	Unassigned	Unassigned	313	8	2.59043e-06	0	0	0	0	0	0	0	0	0	0	0	0	0	0	0	0	0	0	0	0	0	0	3	0	0	0	0	0	0	0	0	0	0	0	0	0	0	0	0
OTU_5602	Unassigned	Unassigned	Unassigned	Unassigned	Unassigned	Unassigned	Unassigned	272	8	2.59043e-06	0	0	0	0	0	0	0	0	0	0	0	0	0	0	0	0	0	0	0	0	0	0	0	0	0	0	0	0	0	0	0	0	0	0	0	0	0	0	0
OTU_5603	Unassigned	Unassigned	Unassigned	Unassigned	Unassigned	Unassigned	Unassigned	378	8	2.59043e-06	0	0	0	0	0	0	0	0	0	0	0	0	0	0	0	0	0	0	0	0	0	0	0	0	0	0	0	0	0	0	0	0	0	0	8	0	0	0	0
OTU_5753	Unassigned	Unassigned	Unassigned	Unassigned	Unassigned	Unassigned	Unassigned	333	8	2.59043e-06	0	0	0	0	0	0	0	0	0	0	0	0	0	0	0	0	0	0	0	0	0	0	0	0	0	0	0	0	0	0	0	0	0	0	0	0	0	0	0
OTU_5786	Unassigned	Unassigned	Unassigned	Unassigned	Unassigned	Unassigned	Unassigned	458	8	2.59043e-06	8	0	0	0	0	0	0	0	0	0	0	0	0	0	0	0	0	0	0	0	0	0	0	0	0	0	0	0	0	0	0	0	0	0	0	0	0	0	0
OTU_5787	Unassigned	Unassigned	Unassigned	Unassigned	Unassigned	Unassigned	Unassigned	331	8	2.59043e-06	0	0	0	0	0	0	0	0	0	0	0	0	0	0	0	0	0	0	0	0	0	0	0	0	0	0	0	0	0	0	0	0	0	0	0	0	0	0	0
OTU_5798	Unassigned	Unassigned	Unassigned	Unassigned	Unassigned	Unassigned	Unassigned	345	8	2.59043e-06	0	0	0	0	0	0	0	0	0	0	0	0	0	0	0	0	0	0	0	0	0	0	0	0	0	0	0	0	0	0	0	0	0	0	0	0	0	0	0
OTU_5832	Unassigned	Unassigned	Unassigned	Unassigned	Unassigned	Unassigned	Unassigned	288	8	2.59043e-06	0	0	0	0	0	0	0	0	0	0	0	0	0	0	0	0	0	0	0	0	0	0	0	0	0	0	0	0	0	0	0	0	0	0	0	0	0	0	0
OTU_5882	Unassigned	Unassigned	Unassigned	Unassigned	Unassigned	Unassigned	Unassigned	342	8	2.59043e-06	0	0	0	0	0	0	0	0	0	0	0	0	0	0	0	0	0	0	0	0	0	0	0	3	0	0	0	0	0	0	0	0	0	0	0	0	0	0	0
OTU_5935	Unassigned	Unassigned	Unassigned	Unassigned	Unassigned	Unassigned	Unassigned	339	8	2.59043e-06	0	0	0	0	0	0	0	0	0	0	0	0	0	0	0	0	0	0	0	0	0	0	0	0	0	0	0	0	0	0	0	8	0	0	0	0	0	0	0
OTU_6064	Unassigned	Unassigned	Unassigned	Unassigned	Unassigned	Unassigned	Unassigned	336	8	2.59043e-06	0	0	0	0	0	0	0	0	0	0	0	0	0	0	0	0	0	0	0	2	0	0	0	0	0	0	0	0	0	0	0	0	0	0	0	0	0	0	0
OTU_6084	Unassigned	Unassigned	Unassigned	Unassigned	Unassigned	Unassigned	Unassigned	326	8	2.59043e-06	0	3	0	0	0	0	0	0	0	0	0	0	0	0	0	0	0	5	0	0	0	0	0	0	0	0	0	0	0	0	0	0	0	0	0	0	0	0	0
OTU_6112	Unassigned	Unassigned	Unassigned	Unassigned	Unassigned	Unassigned	Unassigned	331	8	2.59043e-06	0	0	0	0	0	0	0	0	0	0	0	0	0	0	0	0	0	0	0	0	0	0	0	0	0	0	2	0	0	0	0	0	0	0	0	0	0	0	0
OTU_6125	Unassigned	Unassigned	Unassigned	Unassigned	Unassigned	Unassigned	Unassigned	430	8	2.59043e-06	0	0	0	0	0	0	0	0	0	0	0	0	0	0	0	0	0	0	0	0	0	0	0	0	0	0	0	0	0	0	0	0	0	0	0	0	0	0	0
OTU_6164	Unassigned	Unassigned	Unassigned	Unassigned	Unassigned	Unassigned	Unassigned	351	8	2.59043e-06	0	0	0	0	0	0	0	0	0	0	0	0	0	0	0	0	0	0	0	0	0	0	0	0	0	0	0	0	0	0	0	0	0	0	0	0	0	0	0
OTU_6213	Unassigned	Unassigned	Unassigned	Unassigned	Unassigned	Unassigned	Unassigned	335	8	2.59043e-06	0	0	0	0	0	0	0	0	0	0	0	0	0	0	0	0	0	0	0	0	0	0	0	0	0	0	0	0	0	0	0	0	0	0	0	0	0	0	0
OTU_6234	Unassigned	Unassigned	Unassigned	Unassigned	Unassigned	Unassigned	Unassigned	372	8	2.59043e-06	0	0	0	0	0	0	0	0	0	0	0	0	0	0	0	0	0	0	0	0	0	0	0	0	0	0	0	0	0	0	0	0	0	0	0	0	5	0	0
OTU_6252	Unassigned	Unassigned	Unassigned	Unassigned	Unassigned	Unassigned	Unassigned	351	8	2.59043e-06	0	0	0	0	0	0	0	0	0	0	0	0	0	0	0	0	8	0	0	0	0	0	0	0	0	0	0	0	0	0	0	0	0	0	0	0	0	0	0
OTU_6259	Unassigned	Unassigned	Unassigned	Unassigned	Unassigned	Unassigned	Unassigned	376	8	2.59043e-06	0	0	0	0	0	0	0	0	0	0	0	0	0	0	0	0	0	0	0	0	0	0	0	0	0	0	0	0	0	0	0	0	0	0	0	0	0	0	0
OTU_6266	Unassigned	Unassigned	Unassigned	Unassigned	Unassigned	Unassigned	Unassigned	352	8	2.59043e-06	0	0	0	0	0	0	0	0	0	0	0	0	0	0	0	0	4	0	0	0	0	0	0	0	0	0	0	0	0	0	0	0	0	0	0	0	0	0	0
OTU_6311	Unassigned	Unassigned	Unassigned	Unassigned	Unassigned	Unassigned	Unassigned	348	8	2.59043e-06	8	0	0	0	0	0	0	0	0	0	0	0	0	0	0	0	0	0	0	0	0	0	0	0	0	0	0	0	0	0	0	0	0	0	0	0	0	0	0
OTU_6327	Unassigned	Unassigned	Unassigned	Unassigned	Unassigned	Unassigned	Unassigned	365	8	2.59043e-06	0	0	0	0	0	0	0	0	0	0	0	0	0	0	0	0	0	0	0	0	0	0	0	0	0	0	0	0	0	0	0	0	0	0	0	0	0	0	0
OTU_6422	Unassigned	Unassigned	Unassigned	Unassigned	Unassigned	Unassigned	Unassigned	316	8	2.59043e-06	0	0	0	0	0	0	0	0	0	0	0	0	0	0	0	0	0	0	0	0	0	0	0	0	0	0	0	0	0	0	0	0	0	0	0	0	0	0	0
OTU_6445	Unassigned	Unassigned	Unassigned	Unassigned	Unassigned	Unassigned	Unassigned	337	8	2.59043e-06	0	0	0	0	0	0	0	0	0	0	0	0	0	0	0	0	0	0	0	0	0	0	0	0	0	0	0	0	0	0	0	0	0	0	0	0	0	0	0
OTU_6459	Unassigned	Unassigned	Unassigned	Unassigned	Unassigned	Unassigned	Unassigned	398	8	2.59043e-06	0	0	5	0	0	0	0	0	0	0	0	0	0	0	0	0	0	0	0	0	0	0	1	0	0	0	0	0	0	0	0	0	0	0	0	0	0	0	0
OTU_6474	Unassigned	Unassigned	Unassigned	Unassigned	Unassigned	Unassigned	Unassigned	394	8	2.59043e-06	0	0	0	0	0	0	0	0	0	0	0	0	0	0	0	0	0	0	0	0	0	0	0	0	0	0	0	0	0	0	0	0	0	0	0	0	0	0	0
OTU_6596	Unassigned	Unassigned	Unassigned	Unassigned	Unassigned	Unassigned	Unassigned	340	8	2.59043e-06	0	0	0	0	0	0	0	0	0	0	0	0	8	0	0	0	0	0	0	0	0	0	0	0	0	0	0	0	0	0	0	0	0	0	0	0	0	0	0
OTU_6733	Unassigned	Unassigned	Unassigned	Unassigned	Unassigned	Unassigned	Unassigned	335	8	2.59043e-06	0	0	0	0	0	0	0	0	0	0	0	0	0	0	0	0	0	0	0	0	0	0	0	2	0	0	0	0	0	0	0	0	0	0	0	0	0	1	0
OTU_7398	Unassigned	Unassigned	Unassigned	Unassigned	Unassigned	Unassigned	Unassigned	343	8	2.59043e-06	0	0	0	0	0	0	0	0	0	0	0	0	0	0	0	0	0	0	0	0	0	0	0	0	0	0	0	0	0	0	0	0	0	0	0	0	0	0	0
OTU_7575	Unassigned	Unassigned	Unassigned	Unassigned	Unassigned	Unassigned	Unassigned	262	8	2.59043e-06	0	0	0	0	0	0	0	0	0	0	0	0	0	0	0	0	0	0	0	0	0	0	0	0	0	0	0	0	0	0	0	0	0	0	0	0	0	0	0
OTU_7637	Unassigned	Unassigned	Unassigned	Unassigned	Unassigned	Unassigned	Unassigned	382	8	2.59043e-06	0	0	0	0	0	0	0	0	0	0	0	0	0	0	0	0	0	0	0	0	0	0	0	0	0	0	0	0	0	0	0	0	0	0	0	0	0	0	0
OTU_7658	Unassigned	Unassigned	Unassigned	Unassigned	Unassigned	Unassigned	Unassigned	446	8	2.59043e-06	0	0	0	0	0	0	0	0	0	0	0	0	0	0	0	0	0	0	0	0	0	0	0	8	0	0	0	0	0	0	0	0	0	0	0	0	0	0	0
OTU_7665	Unassigned	Unassigned	Unassigned	Unassigned	Unassigned	Unassigned	Unassigned	451	8	2.59043e-06	0	0	0	0	0	0	0	0	0	0	0	0	0	0	0	0	0	0	0	0	0	0	0	0	0	0	0	0	0	0	0	8	0	0	0	0	0	0	0
OTU_7817	Unassigned	Unassigned	Unassigned	Unassigned	Unassigned	Unassigned	Unassigned	410	8	2.59043e-06	0	0	1	0	0	0	0	0	0	0	0	0	0	0	0	0	0	0	0	0	0	0	0	3	0	0	0	0	0	0	0	0	0	0	0	0	0	0	0
OTU_8033	Unassigned	Unassigned	Unassigned	Unassigned	Unassigned	Unassigned	Unassigned	349	8	2.59043e-06	0	0	0	0	0	0	0	0	0	0	4	0	0	0	0	0	0	0	0	0	0	0	0	4	0	0	0	0	0	0	0	0	0	0	0	0	0	0	0
OTU_8044	Unassigned	Unassigned	Unassigned	Unassigned	Unassigned	Unassigned	Unassigned	334	8	2.59043e-06	0	0	0	0	0	0	0	0	0	0	0	0	0	0	0	0	0	0	0	0	0	0	2	0	0	0	0	0	0	0	0	0	0	0	0	0	0	0	0
OTU_8145	Unassigned	Unassigned	Unassigned	Unassigned	Unassigned	Unassigned	Unassigned	428	8	2.59043e-06	0	0	0	0	0	0	0	0	0	0	0	0	0	0	0	0	0	0	0	0	0	0	0	4	0	0	0	0	0	0	0	0	0	0	0	0	0	0	0
OTU_8171	Unassigned	Unassigned	Unassigned	Unassigned	Unassigned	Unassigned	Unassigned	353	8	2.59043e-06	0	0	0	0	0	0	0	0	0	0	0	0	0	0	0	0	0	0	0	0	0	0	0	0	0	0	0	0	0	0	0	0	0	0	0	8	0	0	0
OTU_8566	Unassigned	Unassigned	Unassigned	Unassigned	Unassigned	Unassigned	Unassigned	485	8	2.59043e-06	0	0	0	0	0	0	0	0	0	0	0	0	0	0	0	0	0	0	0	0	0	0	0	0	0	0	0	0	0	0	0	0	0	0	0	3	2	0	2
OTU_8694	Unassigned	Unassigned	Unassigned	Unassigned	Unassigned	Unassigned	Unassigned	472	8	2.59043e-06	0	0	0	0	0	0	0	0	0	0	0	0	0	0	0	0	0	0	0	0	0	0	0	0	0	5	0	0	0	0	0	0	0	0	0	0	0	3	0
OTU_8751	Unassigned	Unassigned	Unassigned	Unassigned	Unassigned	Unassigned	Unassigned	444	8	2.59043e-06	0	0	0	0	1	0	0	0	0	0	0	0	0	0	0	0	0	0	0	0	0	0	7	0	0	0	0	0	0	0	0	0	0	0	0	0	0	0	0
OTU_8851	Unassigned	Unassigned	Unassigned	Unassigned	Unassigned	Unassigned	Unassigned	350	8	2.59043e-06	0	0	0	0	0	0	0	0	0	0	0	0	0	0	0	0	0	0	0	0	0	0	0	0	0	0	0	0	0	0	0	0	0	0	0	0	0	0	0
OTU_2917	Unassigned	Unassigned	Unassigned	Unassigned	Unassigned	Unassigned	Unassigned	348	7	2.26663e-06	0	0	0	0	0	0	0	0	0	0	0	0	0	0	0	0	0	0	0	0	0	0	0	0	0	0	0	0	0	0	0	0	0	0	0	0	0	0	0
OTU_3074	Unassigned	Unassigned	Unassigned	Unassigned	Unassigned	Unassigned	Unassigned	366	7	2.26663e-06	0	0	0	0	0	0	0	0	0	0	0	0	0	0	0	0	0	0	0	0	0	0	0	0	0	0	0	0	0	0	0	0	0	0	0	0	0	0	0
OTU_3299	Unassigned	Unassigned	Unassigned	Unassigned	Unassigned	Unassigned	Unassigned	338	7	2.26663e-06	0	0	0	0	0	0	0	0	0	0	0	0	0	0	0	0	0	0	0	0	0	0	0	0	0	0	0	0	0	0	0	0	0	0	0	0	0	0	0
OTU_3414	Unassigned	Unassigned	Unassigned	Unassigned	Unassigned	Unassigned	Unassigned	332	7	2.26663e-06	0	0	0	0	0	0	0	0	0	0	0	0	0	0	0	0	0	0	0	0	0	0	0	0	0	0	0	0	0	0	0	0	0	0	0	0	0	0	0
OTU_3447	Unassigned	Unassigned	Unassigned	Unassigned	Unassigned	Unassigned	Unassigned	389	7	2.26663e-06	0	0	0	0	0	0	0	0	0	0	0	0	0	0	0	0	0	0	0	0	0	0	0	0	0	0	0	0	0	0	0	0	0	0	7	0	0	0	0
OTU_3476	Unassigned	Unassigned	Unassigned	Unassigned	Unassigned	Unassigned	Unassigned	342	7	2.26663e-06	0	0	0	0	0	0	0	0	0	0	0	0	0	0	0	0	0	0	0	0	0	0	0	0	0	0	0	0	0	0	0	0	0	0	0	0	0	0	0
OTU_3622	Unassigned	Unassigned	Unassigned	Unassigned	Unassigned	Unassigned	Unassigned	349	7	2.26663e-06	0	0	0	0	0	0	0	0	0	0	0	0	0	0	0	0	0	0	0	0	0	0	4	0	0	0	0	0	0	0	0	0	0	2	0	0	0	0	0
OTU_3664	Unassigned	Unassigned	Unassigned	Unassigned	Unassigned	Unassigned	Unassigned	346	7	2.26663e-06	0	0	0	0	0	0	0	0	0	0	0	0	0	0	7	0	0	0	0	0	0	0	0	0	0	0	0	0	0	0	0	0	0	0	0	0	0	0	0
OTU_3704	Unassigned	Unassigned	Unassigned	Unassigned	Unassigned	Unassigned	Unassigned	349	7	2.26663e-06	0	0	0	0	0	0	0	0	0	0	0	0	0	7	0	0	0	0	0	0	0	0	0	0	0	0	0	0	0	0	0	0	0	0	0	0	0	0	0
OTU_3732	Unassigned	Unassigned	Unassigned	Unassigned	Unassigned	Unassigned	Unassigned	360	7	2.26663e-06	0	0	0	2	2	0	0	0	0	0	0	0	0	0	0	0	0	0	0	0	0	0	0	0	0	0	0	0	0	0	0	0	0	3	0	0	0	0	0
OTU_3757	Unassigned	Unassigned	Unassigned	Unassigned	Unassigned	Unassigned	Unassigned	342	7	2.26663e-06	0	0	0	0	0	0	0	0	0	0	0	0	0	0	0	0	0	0	0	0	0	0	0	0	0	0	0	0	0	0	0	0	0	0	0	0	0	0	0
OTU_3783	Unassigned	Unassigned	Unassigned	Unassigned	Unassigned	Unassigned	Unassigned	333	7	2.26663e-06	0	0	0	0	0	0	0	0	0	0	0	0	0	0	0	0	0	0	0	0	0	0	0	0	0	0	0	0	0	0	0	0	0	0	0	0	0	0	0
OTU_3888	Unassigned	Unassigned	Unassigned	Unassigned	Unassigned	Unassigned	Unassigned	341	7	2.26663e-06	0	0	0	0	0	0	0	0	0	0	0	0	0	0	0	0	0	0	0	0	0	0	0	0	0	0	0	0	0	0	0	0	0	0	0	0	0	0	0
OTU_3956	Unassigned	Unassigned	Unassigned	Unassigned	Unassigned	Unassigned	Unassigned	296	7	2.26663e-06	0	0	0	0	0	0	0	0	0	0	0	0	0	0	0	0	0	0	0	0	0	0	0	0	0	0	0	0	0	0	0	0	0	0	0	0	0	0	0
OTU_4229	Unassigned	Unassigned	Unassigned	Unassigned	Unassigned	Unassigned	Unassigned	342	7	2.26663e-06	0	0	0	0	0	0	0	0	0	0	0	0	0	0	0	0	0	0	0	0	0	0	0	0	0	0	0	0	0	0	0	0	0	0	0	0	0	0	0
OTU_4420	Unassigned	Unassigned	Unassigned	Unassigned	Unassigned	Unassigned	Unassigned	428	7	2.26663e-06	0	0	0	0	0	0	0	0	0	0	0	0	0	0	0	0	0	0	0	0	0	0	0	0	0	0	0	0	0	0	0	0	0	0	0	0	0	0	0
OTU_4563	Unassigned	Unassigned	Unassigned	Unassigned	Unassigned	Unassigned	Unassigned	324	7	2.26663e-06	0	0	0	0	1	0	0	0	0	0	0	0	0	0	0	0	0	0	0	0	0	0	0	0	0	0	0	0	1	0	0	0	0	0	0	0	0	0	0
OTU_4622	Unassigned	Unassigned	Unassigned	Unassigned	Unassigned	Unassigned	Unassigned	358	7	2.26663e-06	0	0	0	0	0	0	0	0	0	0	0	0	0	0	0	0	0	0	0	0	0	0	0	0	0	0	0	0	0	0	0	0	0	0	0	7	0	0	0
OTU_4631	Unassigned	Unassigned	Unassigned	Unassigned	Unassigned	Unassigned	Unassigned	331	7	2.26663e-06	0	0	0	0	5	0	0	0	0	0	0	0	0	0	0	0	0	0	0	0	0	0	0	2	0	0	0	0	0	0	0	0	0	0	0	0	0	0	0
OTU_4634	Unassigned	Unassigned	Unassigned	Unassigned	Unassigned	Unassigned	Unassigned	357	7	2.26663e-06	0	0	0	0	0	0	0	0	0	0	0	0	0	0	0	0	0	0	0	0	0	0	0	0	0	0	0	0	0	0	0	0	0	0	0	0	0	0	0
OTU_4673	Unassigned	Unassigned	Unassigned	Unassigned	Unassigned	Unassigned	Unassigned	338	7	2.26663e-06	0	0	0	0	0	0	1	0	0	0	0	0	0	0	0	0	0	0	0	0	0	0	0	0	0	0	0	0	0	0	0	0	0	0	0	0	0	0	0
OTU_4743	Unassigned	Unassigned	Unassigned	Unassigned	Unassigned	Unassigned	Unassigned	354	7	2.26663e-06	0	0	0	0	0	0	0	0	0	0	0	0	0	0	0	0	0	0	0	0	0	0	0	0	0	0	0	0	0	0	0	0	0	0	0	0	7	0	0
OTU_4841	Unassigned	Unassigned	Unassigned	Unassigned	Unassigned	Unassigned	Unassigned	337	7	2.26663e-06	0	0	0	0	0	0	0	0	7	0	0	0	0	0	0	0	0	0	0	0	0	0	0	0	0	0	0	0	0	0	0	0	0	0	0	0	0	0	0
OTU_4875	Unassigned	Unassigned	Unassigned	Unassigned	Unassigned	Unassigned	Unassigned	257	7	2.26663e-06	0	0	0	0	0	0	0	0	0	0	0	0	0	0	0	0	0	0	0	0	0	0	0	0	0	0	0	0	0	0	0	0	0	0	0	0	0	0	0
OTU_4882	Unassigned	Unassigned	Unassigned	Unassigned	Unassigned	Unassigned	Unassigned	342	7	2.26663e-06	0	0	0	0	0	0	0	0	0	0	0	0	0	0	0	0	0	0	0	0	0	0	0	2	0	0	0	0	2	0	0	0	0	0	0	0	0	0	0
OTU_5014	Unassigned	Unassigned	Unassigned	Unassigned	Unassigned	Unassigned	Unassigned	342	7	2.26663e-06	0	0	0	0	0	0	0	0	0	0	0	0	0	0	0	0	0	0	0	0	0	0	0	0	0	0	0	4	0	0	0	0	0	0	0	0	0	0	0
OTU_5075	Unassigned	Unassigned	Unassigned	Unassigned	Unassigned	Unassigned	Unassigned	368	7	2.26663e-06	0	0	0	0	0	0	0	0	0	0	0	0	0	0	0	0	7	0	0	0	0	0	0	0	0	0	0	0	0	0	0	0	0	0	0	0	0	0	0
OTU_5084	Unassigned	Unassigned	Unassigned	Unassigned	Unassigned	Unassigned	Unassigned	435	7	2.26663e-06	0	0	0	0	1	0	0	0	0	0	0	0	0	0	0	0	0	0	0	0	0	0	0	2	3	0	0	0	0	0	0	0	0	0	0	0	0	0	0
OTU_5133	Unassigned	Unassigned	Unassigned	Unassigned	Unassigned	Unassigned	Unassigned	360	7	2.26663e-06	0	0	0	0	0	0	0	0	0	0	0	0	0	0	0	0	7	0	0	0	0	0	0	0	0	0	0	0	0	0	0	0	0	0	0	0	0	0	0
OTU_5184	Unassigned	Unassigned	Unassigned	Unassigned	Unassigned	Unassigned	Unassigned	358	7	2.26663e-06	0	0	0	0	0	0	0	0	0	0	0	0	0	0	0	0	0	0	0	0	0	0	0	0	0	0	0	0	3	0	0	0	0	0	0	0	0	0	0
OTU_5262	Unassigned	Unassigned	Unassigned	Unassigned	Unassigned	Unassigned	Unassigned	334	7	2.26663e-06	0	0	0	0	4	0	0	0	0	0	0	0	0	0	0	0	0	0	0	0	0	0	0	0	0	0	0	0	0	0	0	0	0	0	0	0	0	3	0
OTU_5330	Unassigned	Unassigned	Unassigned	Unassigned	Unassigned	Unassigned	Unassigned	345	7	2.26663e-06	0	0	0	0	0	0	0	0	0	0	0	0	0	0	0	0	0	0	0	1	0	0	0	0	0	0	0	0	0	0	0	0	0	0	0	0	0	0	0
OTU_5447	Unassigned	Unassigned	Unassigned	Unassigned	Unassigned	Unassigned	Unassigned	438	7	2.26663e-06	0	0	2	0	0	0	0	0	0	0	0	0	0	0	0	0	0	0	0	0	0	0	0	0	0	0	4	0	0	0	0	0	0	0	0	0	0	1	0
OTU_5515	Unassigned	Unassigned	Unassigned	Unassigned	Unassigned	Unassigned	Unassigned	336	7	2.26663e-06	7	0	0	0	0	0	0	0	0	0	0	0	0	0	0	0	0	0	0	0	0	0	0	0	0	0	0	0	0	0	0	0	0	0	0	0	0	0	0
OTU_5541	Unassigned	Unassigned	Unassigned	Unassigned	Unassigned	Unassigned	Unassigned	351	7	2.26663e-06	0	0	0	0	0	0	0	0	0	0	0	0	0	0	0	0	0	0	0	0	0	0	0	0	0	0	0	0	0	0	0	0	0	0	0	0	0	0	0
OTU_5543	Unassigned	Unassigned	Unassigned	Unassigned	Unassigned	Unassigned	Unassigned	337	7	2.26663e-06	0	0	0	0	0	0	0	0	0	0	0	0	0	0	0	0	0	0	0	0	0	0	0	0	0	0	0	0	0	0	0	0	0	0	0	0	0	0	0
OTU_5620	Unassigned	Unassigned	Unassigned	Unassigned	Unassigned	Unassigned	Unassigned	334	7	2.26663e-06	0	0	0	0	0	0	0	0	0	0	0	0	0	0	0	0	0	0	0	0	0	0	0	0	0	0	0	0	0	0	0	0	0	0	0	0	0	0	0
OTU_5671	Unassigned	Unassigned	Unassigned	Unassigned	Unassigned	Unassigned	Unassigned	336	7	2.26663e-06	0	0	0	0	0	0	0	0	0	0	0	0	0	0	0	0	0	3	0	0	0	0	0	0	0	0	0	0	0	0	0	0	0	0	3	0	0	0	0
OTU_5716	Unassigned	Unassigned	Unassigned	Unassigned	Unassigned	Unassigned	Unassigned	340	7	2.26663e-06	0	0	0	0	0	0	0	0	0	0	0	0	0	0	0	0	0	0	0	0	0	0	0	0	0	0	0	0	0	0	0	0	0	0	0	0	0	0	0
OTU_5802	Unassigned	Unassigned	Unassigned	Unassigned	Unassigned	Unassigned	Unassigned	422	7	2.26663e-06	0	0	7	0	0	0	0	0	0	0	0	0	0	0	0	0	0	0	0	0	0	0	0	0	0	0	0	0	0	0	0	0	0	0	0	0	0	0	0
OTU_5803	Unassigned	Unassigned	Unassigned	Unassigned	Unassigned	Unassigned	Unassigned	342	7	2.26663e-06	0	0	0	0	0	0	0	0	0	0	0	0	0	0	0	0	0	0	0	0	0	0	0	0	0	0	0	0	0	0	0	0	0	0	0	0	0	0	0
OTU_5912	Unassigned	Unassigned	Unassigned	Unassigned	Unassigned	Unassigned	Unassigned	422	7	2.26663e-06	0	0	0	0	0	0	0	0	0	0	0	0	0	0	0	0	0	0	0	0	0	0	0	0	0	0	0	0	0	0	0	3	0	0	0	0	0	0	0
OTU_5943	Unassigned	Unassigned	Unassigned	Unassigned	Unassigned	Unassigned	Unassigned	375	7	2.26663e-06	0	0	0	0	0	0	0	0	0	0	0	0	0	0	0	0	0	0	0	0	0	0	0	0	0	0	0	0	0	0	0	0	0	0	0	0	0	0	0
OTU_5956	Unassigned	Unassigned	Unassigned	Unassigned	Unassigned	Unassigned	Unassigned	364	7	2.26663e-06	0	0	0	0	0	0	0	0	0	0	0	0	0	0	0	0	0	0	0	0	0	0	0	0	0	0	0	0	0	0	0	0	0	0	0	0	0	0	0
OTU_5959	Unassigned	Unassigned	Unassigned	Unassigned	Unassigned	Unassigned	Unassigned	317	7	2.26663e-06	0	0	0	0	0	0	0	0	0	0	0	0	0	0	0	0	0	0	0	0	0	0	0	0	0	0	0	0	0	0	0	0	0	0	0	0	0	0	0
OTU_5999	Unassigned	Unassigned	Unassigned	Unassigned	Unassigned	Unassigned	Unassigned	360	7	2.26663e-06	0	0	0	0	0	0	0	0	0	0	0	0	0	0	0	0	0	0	0	0	0	0	0	0	0	0	0	0	0	0	0	0	0	0	0	0	0	0	0
OTU_6037	Unassigned	Unassigned	Unassigned	Unassigned	Unassigned	Unassigned	Unassigned	351	7	2.26663e-06	0	0	0	0	0	0	0	0	0	0	0	0	0	0	0	0	0	0	0	0	0	0	0	0	0	0	0	0	0	0	0	0	0	0	0	0	0	0	0
OTU_6039	Unassigned	Unassigned	Unassigned	Unassigned	Unassigned	Unassigned	Unassigned	386	7	2.26663e-06	0	0	0	0	0	0	0	0	0	7	0	0	0	0	0	0	0	0	0	0	0	0	0	0	0	0	0	0	0	0	0	0	0	0	0	0	0	0	0
OTU_6052	Unassigned	Unassigned	Unassigned	Unassigned	Unassigned	Unassigned	Unassigned	429	7	2.26663e-06	0	0	0	0	0	0	0	0	0	0	0	0	0	0	0	0	0	0	0	0	0	0	0	0	0	0	0	0	0	0	4	0	0	0	0	0	0	0	0
OTU_6108	Unassigned	Unassigned	Unassigned	Unassigned	Unassigned	Unassigned	Unassigned	353	7	2.26663e-06	0	0	0	0	0	0	0	0	0	0	0	0	0	0	0	0	0	0	0	0	0	0	0	0	0	0	0	0	0	0	0	0	0	0	0	7	0	0	0
OTU_6116	Unassigned	Unassigned	Unassigned	Unassigned	Unassigned	Unassigned	Unassigned	273	7	2.26663e-06	0	0	0	0	0	0	0	0	0	0	0	0	0	0	0	0	0	0	0	0	0	0	0	0	0	0	0	0	0	0	0	0	0	0	0	0	0	0	0
OTU_6120	Unassigned	Unassigned	Unassigned	Unassigned	Unassigned	Unassigned	Unassigned	351	7	2.26663e-06	0	0	0	0	0	0	0	0	0	0	0	0	0	0	0	0	0	0	0	0	0	0	0	0	0	0	0	0	0	0	0	0	0	0	0	0	0	0	0
OTU_6212	Unassigned	Unassigned	Unassigned	Unassigned	Unassigned	Unassigned	Unassigned	344	7	2.26663e-06	0	0	0	0	0	0	0	0	0	0	0	0	0	0	0	0	0	0	0	0	0	0	0	0	0	0	0	0	0	0	0	0	0	0	0	0	0	0	0
OTU_6308	Unassigned	Unassigned	Unassigned	Unassigned	Unassigned	Unassigned	Unassigned	343	7	2.26663e-06	0	0	0	0	0	0	0	0	0	0	0	0	0	0	0	0	0	0	0	0	0	0	0	0	0	0	0	0	0	0	0	0	0	0	0	0	0	0	0
OTU_6331	Unassigned	Unassigned	Unassigned	Unassigned	Unassigned	Unassigned	Unassigned	333	7	2.26663e-06	0	0	0	0	0	0	0	0	0	0	0	0	0	0	0	0	0	0	0	0	0	0	0	0	0	0	0	0	0	0	0	0	0	0	0	0	0	0	0
OTU_6369	Unassigned	Unassigned	Unassigned	Unassigned	Unassigned	Unassigned	Unassigned	348	7	2.26663e-06	0	0	0	0	0	0	0	0	0	0	0	0	0	0	0	0	7	0	0	0	0	0	0	0	0	0	0	0	0	0	0	0	0	0	0	0	0	0	0
OTU_6389	Unassigned	Unassigned	Unassigned	Unassigned	Unassigned	Unassigned	Unassigned	316	7	2.26663e-06	0	0	0	0	0	0	0	0	0	0	0	0	0	0	0	0	0	0	0	0	0	0	0	0	0	0	0	0	0	0	0	0	0	0	0	0	0	0	0
OTU_6400	Unassigned	Unassigned	Unassigned	Unassigned	Unassigned	Unassigned	Unassigned	343	7	2.26663e-06	0	0	0	0	0	0	0	0	0	0	0	0	0	0	0	0	0	0	0	0	0	0	0	0	0	0	0	0	0	0	0	0	0	0	0	0	0	0	0
OTU_6413	Unassigned	Unassigned	Unassigned	Unassigned	Unassigned	Unassigned	Unassigned	384	7	2.26663e-06	0	0	0	0	0	0	0	0	0	0	0	0	0	0	0	0	0	0	0	0	0	0	0	0	0	0	0	0	0	0	0	0	0	0	0	0	0	0	0
OTU_6448	Unassigned	Unassigned	Unassigned	Unassigned	Unassigned	Unassigned	Unassigned	347	7	2.26663e-06	0	0	0	0	0	0	0	0	0	0	0	0	0	0	0	0	0	0	0	0	0	0	0	0	0	0	0	0	0	0	0	0	0	0	0	0	0	0	0
OTU_6471	Unassigned	Unassigned	Unassigned	Unassigned	Unassigned	Unassigned	Unassigned	314	7	2.26663e-06	0	0	0	0	0	0	0	0	0	0	0	0	0	0	0	0	0	0	0	0	0	0	0	0	0	0	0	0	0	0	0	0	0	0	0	0	0	0	0
OTU_6499	Unassigned	Unassigned	Unassigned	Unassigned	Unassigned	Unassigned	Unassigned	335	7	2.26663e-06	0	0	0	0	0	0	0	0	6	0	0	0	0	0	0	0	0	0	0	0	0	0	0	0	0	0	0	0	0	0	0	0	0	0	0	0	0	0	0
OTU_6526	Unassigned	Unassigned	Unassigned	Unassigned	Unassigned	Unassigned	Unassigned	350	7	2.26663e-06	0	0	0	0	0	0	0	0	0	0	0	0	0	0	0	0	0	0	0	0	0	0	0	1	0	0	0	0	0	0	0	0	0	0	0	0	0	0	0
OTU_6527	Unassigned	Unassigned	Unassigned	Unassigned	Unassigned	Unassigned	Unassigned	407	7	2.26663e-06	0	0	0	0	0	0	0	0	0	0	0	0	0	0	0	0	0	0	0	0	0	0	0	0	0	0	0	3	0	0	0	0	0	0	0	0	0	0	0
OTU_6619	Unassigned	Unassigned	Unassigned	Unassigned	Unassigned	Unassigned	Unassigned	284	7	2.26663e-06	0	0	0	0	0	0	0	0	0	0	0	0	0	0	0	0	0	0	0	0	0	0	0	0	0	0	0	0	0	0	0	0	0	0	0	0	0	0	0
OTU_6730	Unassigned	Unassigned	Unassigned	Unassigned	Unassigned	Unassigned	Unassigned	314	7	2.26663e-06	0	0	0	0	0	0	0	0	0	0	0	3	0	0	0	0	0	0	0	0	0	0	0	0	0	0	0	0	0	0	0	0	0	0	0	0	0	0	0
OTU_6813	Unassigned	Unassigned	Unassigned	Unassigned	Unassigned	Unassigned	Unassigned	325	7	2.26663e-06	0	0	0	0	1	0	0	0	0	0	0	0	0	0	0	0	0	0	0	0	0	0	0	0	0	0	0	0	0	0	0	0	0	0	0	0	0	0	0
OTU_6819	Unassigned	Unassigned	Unassigned	Unassigned	Unassigned	Unassigned	Unassigned	410	7	2.26663e-06	0	0	0	0	0	0	0	0	0	0	0	0	0	0	0	0	0	0	0	0	0	0	0	2	0	0	0	0	0	0	0	0	0	0	0	0	0	0	0
OTU_6842	Unassigned	Unassigned	Unassigned	Unassigned	Unassigned	Unassigned	Unassigned	405	7	2.26663e-06	0	0	0	0	0	0	0	0	0	0	0	0	0	0	0	0	0	0	0	0	0	0	0	2	0	0	0	0	0	0	0	0	0	0	0	0	0	0	0
OTU_6876	Unassigned	Unassigned	Unassigned	Unassigned	Unassigned	Unassigned	Unassigned	443	7	2.26663e-06	0	0	0	0	0	0	0	0	0	0	0	0	0	0	0	0	0	0	0	0	0	0	0	0	0	0	0	0	0	0	0	0	0	0	0	0	0	0	0
OTU_6902	Unassigned	Unassigned	Unassigned	Unassigned	Unassigned	Unassigned	Unassigned	342	7	2.26663e-06	0	0	0	0	0	0	0	0	0	0	0	0	0	0	0	0	0	0	0	0	0	0	0	0	0	0	0	0	0	0	0	0	0	0	0	0	0	0	0
OTU_6932	Unassigned	Unassigned	Unassigned	Unassigned	Unassigned	Unassigned	Unassigned	425	7	2.26663e-06	0	0	0	0	0	0	0	0	0	0	0	0	0	0	0	0	0	0	0	0	0	0	0	0	0	0	2	0	0	0	0	0	0	0	0	0	5	0	0
OTU_6951	Unassigned	Unassigned	Unassigned	Unassigned	Unassigned	Unassigned	Unassigned	407	7	2.26663e-06	0	0	0	0	0	0	0	0	0	0	0	0	0	0	0	0	0	0	0	0	0	0	0	0	0	0	0	0	0	0	0	0	0	0	0	0	0	7	0
OTU_6965	Unassigned	Unassigned	Unassigned	Unassigned	Unassigned	Unassigned	Unassigned	328	7	2.26663e-06	0	0	1	0	0	0	0	0	0	0	0	0	0	0	0	0	0	0	0	0	0	0	0	0	0	0	0	0	0	0	0	0	0	0	0	0	0	0	0
OTU_7042	Unassigned	Unassigned	Unassigned	Unassigned	Unassigned	Unassigned	Unassigned	349	7	2.26663e-06	0	0	0	0	0	0	0	0	0	0	0	0	0	0	0	0	0	0	0	0	0	0	0	0	0	0	0	0	0	0	0	0	0	0	0	0	0	0	0
OTU_7150	Unassigned	Unassigned	Unassigned	Unassigned	Unassigned	Unassigned	Unassigned	356	7	2.26663e-06	0	0	0	0	0	0	0	0	0	0	0	0	0	0	0	0	0	0	0	0	0	0	0	0	0	0	0	0	1	0	0	6	0	0	0	0	0	0	0
OTU_7168	Unassigned	Unassigned	Unassigned	Unassigned	Unassigned	Unassigned	Unassigned	425	7	2.26663e-06	0	0	0	0	0	0	0	0	0	0	0	0	0	0	0	0	0	0	0	0	0	0	0	0	0	0	0	0	0	0	0	0	0	0	0	0	0	0	0
OTU_7193	Unassigned	Unassigned	Unassigned	Unassigned	Unassigned	Unassigned	Unassigned	383	7	2.26663e-06	0	0	0	0	0	0	0	0	0	0	0	0	7	0	0	0	0	0	0	0	0	0	0	0	0	0	0	0	0	0	0	0	0	0	0	0	0	0	0
OTU_7272	Unassigned	Unassigned	Unassigned	Unassigned	Unassigned	Unassigned	Unassigned	349	7	2.26663e-06	0	0	0	0	0	0	0	0	0	0	0	0	0	0	0	0	0	5	0	0	0	0	0	0	0	0	0	0	0	0	0	0	0	0	0	0	0	0	0
OTU_7361	Unassigned	Unassigned	Unassigned	Unassigned	Unassigned	Unassigned	Unassigned	338	7	2.26663e-06	0	0	0	0	0	0	0	0	0	0	0	0	0	0	0	0	0	0	0	0	0	0	0	0	0	0	0	0	0	0	0	0	0	0	0	0	0	0	0
OTU_7468	Unassigned	Unassigned	Unassigned	Unassigned	Unassigned	Unassigned	Unassigned	344	7	2.26663e-06	0	0	0	0	0	0	0	0	0	0	0	0	0	0	0	0	0	0	0	0	0	0	0	0	0	0	0	0	0	0	0	0	0	0	0	0	0	0	0
OTU_7535	Unassigned	Unassigned	Unassigned	Unassigned	Unassigned	Unassigned	Unassigned	345	7	2.26663e-06	0	0	0	0	0	0	0	0	0	0	0	0	0	0	0	0	0	0	0	0	0	0	0	0	0	0	0	0	0	0	0	0	0	0	0	0	0	0	0
OTU_7636	Unassigned	Unassigned	Unassigned	Unassigned	Unassigned	Unassigned	Unassigned	333	7	2.26663e-06	0	0	0	0	0	0	0	0	0	0	0	0	0	0	0	0	0	0	0	0	0	0	0	0	0	0	0	0	0	0	0	0	0	0	0	0	0	0	0
OTU_7682	Unassigned	Unassigned	Unassigned	Unassigned	Unassigned	Unassigned	Unassigned	331	7	2.26663e-06	0	0	0	0	0	0	0	0	0	0	0	0	0	0	0	0	0	0	0	0	0	0	0	0	0	0	0	0	0	0	0	0	0	0	0	0	0	0	0
OTU_7717	Unassigned	Unassigned	Unassigned	Unassigned	Unassigned	Unassigned	Unassigned	344	7	2.26663e-06	0	0	0	0	0	0	0	0	0	0	0	0	0	0	0	0	0	0	0	0	0	0	0	0	0	0	0	0	0	0	0	0	0	0	0	0	0	0	0
OTU_7846	Unassigned	Unassigned	Unassigned	Unassigned	Unassigned	Unassigned	Unassigned	345	7	2.26663e-06	5	0	0	0	0	0	0	0	0	0	0	0	0	0	0	0	0	0	0	0	0	0	0	0	0	0	0	0	0	0	0	0	0	0	0	0	0	0	0
OTU_7856	Unassigned	Unassigned	Unassigned	Unassigned	Unassigned	Unassigned	Unassigned	335	7	2.26663e-06	0	0	0	0	0	0	0	0	5	0	0	0	0	0	0	0	0	0	0	0	0	0	0	0	0	0	0	0	0	0	0	0	0	0	0	0	0	0	0
OTU_7869	Unassigned	Unassigned	Unassigned	Unassigned	Unassigned	Unassigned	Unassigned	341	7	2.26663e-06	0	0	0	0	0	0	0	0	0	0	0	0	0	0	0	0	0	0	0	0	0	0	0	0	0	0	0	0	0	0	0	0	0	0	0	0	0	0	0
OTU_8043	Unassigned	Unassigned	Unassigned	Unassigned	Unassigned	Unassigned	Unassigned	433	7	2.26663e-06	0	0	0	0	0	0	0	0	0	0	0	0	0	0	0	0	0	0	0	0	0	0	0	0	0	0	0	0	0	0	0	7	0	0	0	0	0	0	0
OTU_8231	Unassigned	Unassigned	Unassigned	Unassigned	Unassigned	Unassigned	Unassigned	332	7	2.26663e-06	0	0	0	7	0	0	0	0	0	0	0	0	0	0	0	0	0	0	0	0	0	0	0	0	0	0	0	0	0	0	0	0	0	0	0	0	0	0	0
OTU_8356	Unassigned	Unassigned	Unassigned	Unassigned	Unassigned	Unassigned	Unassigned	343	7	2.26663e-06	0	0	0	0	0	0	0	0	0	0	0	0	0	0	0	0	7	0	0	0	0	0	0	0	0	0	0	0	0	0	0	0	0	0	0	0	0	0	0
OTU_8560	Unassigned	Unassigned	Unassigned	Unassigned	Unassigned	Unassigned	Unassigned	313	7	2.26663e-06	0	0	0	0	0	0	0	0	0	0	0	0	0	0	0	0	0	0	0	0	0	0	0	0	0	0	0	0	0	0	0	0	0	0	0	1	2	0	0
OTU_8651	Unassigned	Unassigned	Unassigned	Unassigned	Unassigned	Unassigned	Unassigned	430	7	2.26663e-06	0	0	0	0	0	0	0	0	0	0	0	0	0	0	0	0	0	0	0	0	0	0	0	7	0	0	0	0	0	0	0	0	0	0	0	0	0	0	0
OTU_8766	Unassigned	Unassigned	Unassigned	Unassigned	Unassigned	Unassigned	Unassigned	346	7	2.26663e-06	0	0	0	0	0	0	0	0	0	0	0	0	0	0	0	0	0	0	0	0	0	0	0	0	0	0	0	0	0	0	0	0	0	0	0	0	0	0	0
OTU_8912	Unassigned	Unassigned	Unassigned	Unassigned	Unassigned	Unassigned	Unassigned	344	7	2.26663e-06	5	0	0	0	0	0	0	0	0	0	0	0	0	0	0	0	0	0	0	0	0	0	0	1	0	0	0	0	0	0	0	0	0	0	0	0	0	0	0
OTU_3184	Unassigned	Unassigned	Unassigned	Unassigned	Unassigned	Unassigned	Unassigned	330	6	1.94282e-06	0	0	0	0	0	0	0	0	0	0	0	0	0	0	0	0	0	0	0	0	0	0	0	0	0	0	0	0	0	0	0	0	0	0	0	0	0	0	0
OTU_3372	Unassigned	Unassigned	Unassigned	Unassigned	Unassigned	Unassigned	Unassigned	360	6	1.94282e-06	0	0	0	0	0	0	0	0	0	0	0	0	0	0	0	0	0	0	0	0	0	0	0	0	0	0	0	0	0	0	6	0	0	0	0	0	0	0	0
OTU_3592	Unassigned	Unassigned	Unassigned	Unassigned	Unassigned	Unassigned	Unassigned	329	6	1.94282e-06	0	0	0	0	0	0	0	0	0	0	0	0	0	0	0	0	0	0	0	0	0	0	0	0	0	0	0	0	0	0	0	0	0	0	0	6	0	0	0
OTU_3662	Unassigned	Unassigned	Unassigned	Unassigned	Unassigned	Unassigned	Unassigned	279	6	1.94282e-06	0	0	0	0	0	0	0	4	0	0	0	0	2	0	0	0	0	0	0	0	0	0	0	0	0	0	0	0	0	0	0	0	0	0	0	0	0	0	0
OTU_3765	Unassigned	Unassigned	Unassigned	Unassigned	Unassigned	Unassigned	Unassigned	291	6	1.94282e-06	0	0	0	0	0	0	0	0	0	0	0	0	0	0	6	0	0	0	0	0	0	0	0	0	0	0	0	0	0	0	0	0	0	0	0	0	0	0	0
OTU_3854	Unassigned	Unassigned	Unassigned	Unassigned	Unassigned	Unassigned	Unassigned	335	6	1.94282e-06	0	0	0	0	0	0	0	0	0	0	0	0	0	0	0	0	0	0	0	0	0	0	6	0	0	0	0	0	0	0	0	0	0	0	0	0	0	0	0
OTU_3877	Unassigned	Unassigned	Unassigned	Unassigned	Unassigned	Unassigned	Unassigned	357	6	1.94282e-06	0	0	0	0	0	0	0	0	0	0	0	0	0	0	0	0	0	6	0	0	0	0	0	0	0	0	0	0	0	0	0	0	0	0	0	0	0	0	0
OTU_3887	Unassigned	Unassigned	Unassigned	Unassigned	Unassigned	Unassigned	Unassigned	327	6	1.94282e-06	0	0	0	0	0	0	0	0	0	0	0	0	0	0	0	0	0	0	0	0	0	0	0	0	0	0	0	0	0	0	0	0	0	0	0	0	0	0	0
OTU_3898	Unassigned	Unassigned	Unassigned	Unassigned	Unassigned	Unassigned	Unassigned	460	6	1.94282e-06	0	0	0	0	0	0	0	0	0	0	0	0	0	0	0	0	0	0	0	0	0	0	0	0	0	0	0	0	0	0	0	0	0	0	6	0	0	0	0
OTU_3913	Unassigned	Unassigned	Unassigned	Unassigned	Unassigned	Unassigned	Unassigned	338	6	1.94282e-06	0	0	0	0	0	0	0	0	0	0	0	0	0	0	0	0	0	0	0	0	0	0	0	0	0	0	0	0	0	0	0	0	0	0	0	0	0	0	0
OTU_3924	Unassigned	Unassigned	Unassigned	Unassigned	Unassigned	Unassigned	Unassigned	352	6	1.94282e-06	0	0	0	0	0	0	0	0	0	0	0	0	0	0	0	0	0	0	0	0	0	0	0	0	0	0	0	0	0	0	0	0	0	0	0	0	0	0	0
OTU_4046	Unassigned	Unassigned	Unassigned	Unassigned	Unassigned	Unassigned	Unassigned	365	6	1.94282e-06	0	0	0	0	0	0	0	0	0	0	0	0	0	0	0	0	0	0	0	0	0	0	0	0	0	0	0	0	0	0	0	0	0	0	0	0	0	0	0
OTU_4060	Unassigned	Unassigned	Unassigned	Unassigned	Unassigned	Unassigned	Unassigned	332	6	1.94282e-06	0	0	0	0	0	0	0	0	0	0	0	0	0	0	0	0	0	6	0	0	0	0	0	0	0	0	0	0	0	0	0	0	0	0	0	0	0	0	0
OTU_4090	Unassigned	Unassigned	Unassigned	Unassigned	Unassigned	Unassigned	Unassigned	352	6	1.94282e-06	0	0	0	0	0	0	0	0	0	0	0	0	0	0	0	0	0	0	0	0	0	0	0	0	0	0	0	0	0	0	0	0	0	0	0	0	0	0	0
OTU_4099	Unassigned	Unassigned	Unassigned	Unassigned	Unassigned	Unassigned	Unassigned	282	6	1.94282e-06	0	0	0	0	0	0	0	0	0	0	0	0	0	0	0	0	0	0	0	5	0	0	0	0	0	0	0	0	0	0	0	0	0	0	0	0	0	0	0
OTU_4157	Unassigned	Unassigned	Unassigned	Unassigned	Unassigned	Unassigned	Unassigned	340	6	1.94282e-06	0	0	0	0	0	0	0	0	0	0	0	0	0	0	0	0	0	0	0	0	0	0	0	0	0	0	0	0	0	0	0	0	0	0	0	1	0	0	0
OTU_4180	Unassigned	Unassigned	Unassigned	Unassigned	Unassigned	Unassigned	Unassigned	349	6	1.94282e-06	0	0	0	0	0	0	0	0	0	0	0	0	0	0	0	0	0	0	0	0	0	0	0	0	0	0	0	0	0	0	0	0	0	0	0	0	0	0	0
OTU_4349	Unassigned	Unassigned	Unassigned	Unassigned	Unassigned	Unassigned	Unassigned	277	6	1.94282e-06	0	0	0	0	0	0	0	0	0	0	0	1	0	0	0	0	0	0	0	0	0	0	0	0	0	0	0	0	0	0	0	0	0	0	0	0	0	0	0
OTU_4444	Unassigned	Unassigned	Unassigned	Unassigned	Unassigned	Unassigned	Unassigned	341	6	1.94282e-06	2	0	0	0	0	0	0	0	0	0	0	0	0	0	0	0	0	0	0	0	4	0	0	0	0	0	0	0	0	0	0	0	0	0	0	0	0	0	0
OTU_4455	Unassigned	Unassigned	Unassigned	Unassigned	Unassigned	Unassigned	Unassigned	282	6	1.94282e-06	0	0	0	0	0	0	0	0	0	0	0	0	0	0	0	0	0	0	0	0	0	0	0	0	0	0	0	0	0	0	0	0	0	0	0	0	0	0	0
OTU_4460	Unassigned	Unassigned	Unassigned	Unassigned	Unassigned	Unassigned	Unassigned	360	6	1.94282e-06	0	0	0	0	0	0	0	0	0	0	0	0	0	0	0	0	0	0	0	0	0	0	0	0	0	0	0	0	0	0	0	0	0	0	0	0	0	0	0
OTU_4517	Unassigned	Unassigned	Unassigned	Unassigned	Unassigned	Unassigned	Unassigned	332	6	1.94282e-06	0	0	0	0	0	0	0	0	0	0	0	0	0	0	0	0	0	0	0	0	0	0	0	0	0	0	0	0	0	0	0	6	0	0	0	0	0	0	0
OTU_4583	Unassigned	Unassigned	Unassigned	Unassigned	Unassigned	Unassigned	Unassigned	337	6	1.94282e-06	0	0	0	0	0	0	0	0	0	0	0	0	0	0	0	0	0	0	0	0	0	0	0	0	0	0	0	0	0	0	0	0	0	0	0	0	0	0	0
OTU_4603	Unassigned	Unassigned	Unassigned	Unassigned	Unassigned	Unassigned	Unassigned	344	6	1.94282e-06	0	0	0	0	0	0	0	0	6	0	0	0	0	0	0	0	0	0	0	0	0	0	0	0	0	0	0	0	0	0	0	0	0	0	0	0	0	0	0
OTU_4737	Unassigned	Unassigned	Unassigned	Unassigned	Unassigned	Unassigned	Unassigned	264	6	1.94282e-06	0	0	0	0	0	0	0	0	0	0	2	0	0	0	0	0	0	0	0	0	0	0	0	0	0	0	0	0	0	0	0	0	0	0	0	0	0	0	0
OTU_4812	Unassigned	Unassigned	Unassigned	Unassigned	Unassigned	Unassigned	Unassigned	397	6	1.94282e-06	0	0	0	0	0	0	0	0	6	0	0	0	0	0	0	0	0	0	0	0	0	0	0	0	0	0	0	0	0	0	0	0	0	0	0	0	0	0	0
OTU_4818	Unassigned	Unassigned	Unassigned	Unassigned	Unassigned	Unassigned	Unassigned	347	6	1.94282e-06	0	0	0	0	0	0	0	0	0	0	0	0	0	0	6	0	0	0	0	0	0	0	0	0	0	0	0	0	0	0	0	0	0	0	0	0	0	0	0
OTU_4829	Unassigned	Unassigned	Unassigned	Unassigned	Unassigned	Unassigned	Unassigned	339	6	1.94282e-06	0	0	0	0	0	0	0	0	0	0	0	0	0	0	0	0	0	6	0	0	0	0	0	0	0	0	0	0	0	0	0	0	0	0	0	0	0	0	0
OTU_4830	Unassigned	Unassigned	Unassigned	Unassigned	Unassigned	Unassigned	Unassigned	349	6	1.94282e-06	0	0	0	0	0	0	0	0	0	0	0	0	0	0	0	0	0	0	0	0	0	0	0	0	0	0	0	0	0	0	0	0	0	0	0	0	0	0	0
OTU_4831	Unassigned	Unassigned	Unassigned	Unassigned	Unassigned	Unassigned	Unassigned	328	6	1.94282e-06	0	0	0	0	0	0	0	0	0	0	0	0	0	0	0	0	0	0	0	0	0	0	2	0	0	0	0	0	0	0	0	2	0	0	0	0	0	0	0
OTU_4878	Unassigned	Unassigned	Unassigned	Unassigned	Unassigned	Unassigned	Unassigned	355	6	1.94282e-06	0	0	0	0	0	0	0	0	0	0	0	0	0	0	0	0	0	0	0	0	0	0	0	0	0	0	0	0	0	0	0	0	0	0	0	0	5	0	0
OTU_4892	Unassigned	Unassigned	Unassigned	Unassigned	Unassigned	Unassigned	Unassigned	364	6	1.94282e-06	0	0	0	0	0	0	0	0	0	0	0	0	0	0	0	0	0	0	0	0	0	0	0	0	0	0	0	0	0	0	0	0	0	0	6	0	0	0	0
OTU_4920	Unassigned	Unassigned	Unassigned	Unassigned	Unassigned	Unassigned	Unassigned	342	6	1.94282e-06	0	0	0	0	0	0	0	0	0	0	0	0	0	0	0	0	0	0	0	0	0	0	0	0	0	0	0	0	0	0	0	0	0	0	0	0	0	0	0
OTU_4928	Unassigned	Unassigned	Unassigned	Unassigned	Unassigned	Unassigned	Unassigned	332	6	1.94282e-06	0	0	0	0	0	0	0	0	0	0	0	0	0	0	0	0	0	0	0	0	0	0	0	0	0	0	0	0	0	0	0	0	0	6	0	0	0	0	0
OTU_4937	Unassigned	Unassigned	Unassigned	Unassigned	Unassigned	Unassigned	Unassigned	315	6	1.94282e-06	0	0	0	0	0	0	0	0	0	0	0	0	0	0	0	0	0	0	0	0	0	0	0	0	0	0	0	0	0	0	0	0	0	0	0	0	0	0	0
OTU_4965	Unassigned	Unassigned	Unassigned	Unassigned	Unassigned	Unassigned	Unassigned	381	6	1.94282e-06	0	0	0	0	0	0	0	0	0	0	0	0	0	0	0	0	0	0	0	0	0	0	0	0	0	0	0	0	0	0	0	0	0	0	0	0	0	0	0
OTU_4988	Unassigned	Unassigned	Unassigned	Unassigned	Unassigned	Unassigned	Unassigned	354	6	1.94282e-06	0	0	0	0	0	0	0	0	0	0	0	0	0	0	0	0	0	6	0	0	0	0	0	0	0	0	0	0	0	0	0	0	0	0	0	0	0	0	0
OTU_5007	Unassigned	Unassigned	Unassigned	Unassigned	Unassigned	Unassigned	Unassigned	330	6	1.94282e-06	0	0	0	0	0	0	0	0	0	0	0	0	0	0	0	0	0	0	0	0	0	0	0	0	0	0	0	0	0	0	0	0	0	0	0	0	0	0	0
OTU_5049	Unassigned	Unassigned	Unassigned	Unassigned	Unassigned	Unassigned	Unassigned	343	6	1.94282e-06	0	0	0	0	0	0	0	0	0	0	0	0	0	0	0	0	0	0	0	0	0	0	0	0	0	0	0	0	0	0	0	0	0	0	0	0	0	0	0
OTU_5072	Unassigned	Unassigned	Unassigned	Unassigned	Unassigned	Unassigned	Unassigned	343	6	1.94282e-06	0	0	0	0	0	0	0	0	0	0	0	0	0	0	0	0	0	0	0	0	0	0	0	0	0	0	0	0	0	0	0	0	0	0	0	0	0	6	0
OTU_5140	Unassigned	Unassigned	Unassigned	Unassigned	Unassigned	Unassigned	Unassigned	434	6	1.94282e-06	0	0	0	0	0	0	0	0	0	0	0	0	0	0	0	0	0	0	0	0	0	0	0	0	0	0	0	0	0	0	0	0	0	0	0	0	0	0	0
OTU_5217	Unassigned	Unassigned	Unassigned	Unassigned	Unassigned	Unassigned	Unassigned	358	6	1.94282e-06	0	0	0	0	0	0	0	0	0	0	0	0	0	0	0	0	0	0	0	0	0	0	0	0	0	0	0	0	0	0	0	0	0	0	0	0	0	0	0
OTU_5245	Unassigned	Unassigned	Unassigned	Unassigned	Unassigned	Unassigned	Unassigned	347	6	1.94282e-06	0	0	0	0	2	0	0	0	0	0	0	0	0	0	0	0	0	0	0	0	0	0	0	0	0	0	0	0	0	0	0	0	0	0	0	0	0	0	0
OTU_5264	Unassigned	Unassigned	Unassigned	Unassigned	Unassigned	Unassigned	Unassigned	274	6	1.94282e-06	0	6	0	0	0	0	0	0	0	0	0	0	0	0	0	0	0	0	0	0	0	0	0	0	0	0	0	0	0	0	0	0	0	0	0	0	0	0	0
OTU_5271	Unassigned	Unassigned	Unassigned	Unassigned	Unassigned	Unassigned	Unassigned	351	6	1.94282e-06	0	0	0	0	0	0	0	0	0	0	0	0	0	0	0	0	0	0	0	0	0	0	0	0	0	0	0	0	0	0	0	6	0	0	0	0	0	0	0
OTU_5281	Unassigned	Unassigned	Unassigned	Unassigned	Unassigned	Unassigned	Unassigned	284	6	1.94282e-06	0	0	0	0	0	0	0	0	0	0	0	0	0	0	0	0	0	0	0	2	0	0	0	0	0	0	4	0	0	0	0	0	0	0	0	0	0	0	0
OTU_5400	Unassigned	Unassigned	Unassigned	Unassigned	Unassigned	Unassigned	Unassigned	365	6	1.94282e-06	0	0	0	0	0	0	0	0	0	0	0	0	0	0	0	0	0	0	0	0	0	0	0	0	0	0	0	0	0	0	0	0	0	0	0	0	0	0	0
OTU_5481	Unassigned	Unassigned	Unassigned	Unassigned	Unassigned	Unassigned	Unassigned	342	6	1.94282e-06	0	0	0	0	0	0	0	0	0	0	0	0	0	0	0	0	0	0	0	0	0	0	0	0	0	0	0	0	0	0	0	0	0	0	0	0	0	0	0
OTU_5507	Unassigned	Unassigned	Unassigned	Unassigned	Unassigned	Unassigned	Unassigned	348	6	1.94282e-06	0	0	0	0	0	0	0	0	0	0	0	0	0	0	0	0	0	0	0	0	0	0	0	0	0	0	0	0	0	0	0	0	0	0	0	0	0	0	0
OTU_5663	Unassigned	Unassigned	Unassigned	Unassigned	Unassigned	Unassigned	Unassigned	341	6	1.94282e-06	0	0	0	0	0	0	0	0	0	0	0	0	0	0	0	0	0	0	0	0	0	0	5	0	0	0	0	0	0	0	0	0	0	0	0	0	0	0	0
OTU_5756	Unassigned	Unassigned	Unassigned	Unassigned	Unassigned	Unassigned	Unassigned	348	6	1.94282e-06	3	0	0	0	0	0	0	0	0	0	0	0	0	0	0	0	0	0	0	0	0	0	0	0	0	0	0	0	0	0	0	0	0	0	2	0	0	0	0
OTU_5775	Unassigned	Unassigned	Unassigned	Unassigned	Unassigned	Unassigned	Unassigned	341	6	1.94282e-06	0	0	0	0	0	0	0	0	0	0	0	0	0	0	0	0	0	0	0	2	0	0	0	0	0	0	4	0	0	0	0	0	0	0	0	0	0	0	0
OTU_5916	Unassigned	Unassigned	Unassigned	Unassigned	Unassigned	Unassigned	Unassigned	334	6	1.94282e-06	0	0	0	0	0	0	0	6	0	0	0	0	0	0	0	0	0	0	0	0	0	0	0	0	0	0	0	0	0	0	0	0	0	0	0	0	0	0	0
OTU_5969	Unassigned	Unassigned	Unassigned	Unassigned	Unassigned	Unassigned	Unassigned	334	6	1.94282e-06	0	0	0	0	0	0	0	0	0	0	0	0	0	0	0	0	0	0	0	0	0	0	0	0	0	0	0	0	0	0	0	0	0	0	0	0	0	0	0
OTU_6009	Unassigned	Unassigned	Unassigned	Unassigned	Unassigned	Unassigned	Unassigned	413	6	1.94282e-06	0	0	0	0	0	0	0	0	0	0	0	0	0	0	0	0	0	6	0	0	0	0	0	0	0	0	0	0	0	0	0	0	0	0	0	0	0	0	0
OTU_6077	Unassigned	Unassigned	Unassigned	Unassigned	Unassigned	Unassigned	Unassigned	345	6	1.94282e-06	0	0	0	0	0	0	0	0	0	0	0	0	0	0	0	0	6	0	0	0	0	0	0	0	0	0	0	0	0	0	0	0	0	0	0	0	0	0	0
OTU_6163	Unassigned	Unassigned	Unassigned	Unassigned	Unassigned	Unassigned	Unassigned	363	6	1.94282e-06	0	0	0	0	0	0	0	0	0	0	0	0	0	0	0	0	0	0	0	0	0	0	0	0	0	0	0	0	0	0	0	0	0	0	0	0	0	0	0
OTU_6192	Unassigned	Unassigned	Unassigned	Unassigned	Unassigned	Unassigned	Unassigned	352	6	1.94282e-06	0	0	0	0	0	0	0	0	0	0	0	0	0	0	0	0	0	4	0	0	0	0	0	0	0	0	0	0	0	0	0	0	0	0	0	0	0	0	0
OTU_6409	Unassigned	Unassigned	Unassigned	Unassigned	Unassigned	Unassigned	Unassigned	340	6	1.94282e-06	0	0	0	0	0	0	0	0	0	0	0	0	0	0	0	0	0	0	0	0	0	0	2	0	0	0	0	0	0	0	3	0	0	0	0	0	0	0	0
OTU_6460	Unassigned	Unassigned	Unassigned	Unassigned	Unassigned	Unassigned	Unassigned	422	6	1.94282e-06	0	0	0	0	0	0	0	0	0	0	0	0	0	0	0	0	0	0	0	0	0	0	0	0	0	0	0	0	0	0	0	0	0	0	0	0	0	0	0
OTU_6470	Unassigned	Unassigned	Unassigned	Unassigned	Unassigned	Unassigned	Unassigned	313	6	1.94282e-06	0	0	0	6	0	0	0	0	0	0	0	0	0	0	0	0	0	0	0	0	0	0	0	0	0	0	0	0	0	0	0	0	0	0	0	0	0	0	0
OTU_6541	Unassigned	Unassigned	Unassigned	Unassigned	Unassigned	Unassigned	Unassigned	350	6	1.94282e-06	0	0	0	0	0	0	0	0	0	0	0	0	0	0	0	0	0	0	0	0	0	0	0	2	0	0	0	0	0	0	0	0	0	0	0	0	0	0	0
OTU_6555	Unassigned	Unassigned	Unassigned	Unassigned	Unassigned	Unassigned	Unassigned	322	6	1.94282e-06	0	0	0	0	0	0	0	0	0	0	0	0	0	0	0	0	0	0	0	0	0	0	0	0	0	0	0	0	0	0	0	5	0	0	0	0	0	0	0
OTU_6693	Unassigned	Unassigned	Unassigned	Unassigned	Unassigned	Unassigned	Unassigned	326	6	1.94282e-06	0	0	0	0	0	0	0	0	0	0	0	0	0	0	0	0	0	0	0	0	0	0	0	0	0	0	0	0	0	0	0	0	0	0	0	0	0	0	0
OTU_6726	Unassigned	Unassigned	Unassigned	Unassigned	Unassigned	Unassigned	Unassigned	356	6	1.94282e-06	0	0	0	0	0	0	0	0	0	0	0	0	0	0	0	0	0	0	0	0	0	0	0	0	0	0	0	0	0	0	0	0	0	0	6	0	0	0	0
OTU_6735	Unassigned	Unassigned	Unassigned	Unassigned	Unassigned	Unassigned	Unassigned	341	6	1.94282e-06	0	0	0	0	0	0	0	0	0	0	0	0	0	0	0	0	0	0	0	0	0	0	0	0	0	0	0	0	0	0	0	0	0	0	6	0	0	0	0
OTU_6740	Unassigned	Unassigned	Unassigned	Unassigned	Unassigned	Unassigned	Unassigned	351	6	1.94282e-06	0	0	0	0	0	0	0	0	0	0	0	0	0	0	0	0	0	0	0	0	0	0	0	0	0	0	0	0	0	0	0	0	0	0	6	0	0	0	0
OTU_6741	Unassigned	Unassigned	Unassigned	Unassigned	Unassigned	Unassigned	Unassigned	338	6	1.94282e-06	0	0	0	0	0	0	0	0	0	0	0	0	0	0	0	0	0	0	0	0	0	0	0	4	0	0	0	0	0	0	0	0	0	0	2	0	0	0	0
OTU_6786	Unassigned	Unassigned	Unassigned	Unassigned	Unassigned	Unassigned	Unassigned	399	6	1.94282e-06	3	0	0	0	0	0	0	0	0	0	0	0	0	0	0	0	0	0	0	0	0	0	0	0	0	1	2	0	0	0	0	0	0	0	0	0	0	0	0
OTU_6826	Unassigned	Unassigned	Unassigned	Unassigned	Unassigned	Unassigned	Unassigned	335	6	1.94282e-06	0	0	0	0	0	0	0	0	0	0	0	0	0	0	0	0	0	0	0	0	0	0	0	0	0	0	6	0	0	0	0	0	0	0	0	0	0	0	0
OTU_6839	Unassigned	Unassigned	Unassigned	Unassigned	Unassigned	Unassigned	Unassigned	457	6	1.94282e-06	0	0	0	0	0	0	0	0	0	0	0	0	0	0	0	0	0	0	0	0	0	0	0	3	0	0	0	0	0	0	0	0	0	0	0	0	0	3	0
OTU_6850	Unassigned	Unassigned	Unassigned	Unassigned	Unassigned	Unassigned	Unassigned	327	6	1.94282e-06	0	0	0	0	0	0	0	0	0	0	0	0	0	0	0	0	0	0	0	0	0	0	0	0	0	0	0	0	0	0	0	0	2	0	0	0	0	0	0
OTU_6890	Unassigned	Unassigned	Unassigned	Unassigned	Unassigned	Unassigned	Unassigned	339	6	1.94282e-06	0	0	0	0	6	0	0	0	0	0	0	0	0	0	0	0	0	0	0	0	0	0	0	0	0	0	0	0	0	0	0	0	0	0	0	0	0	0	0
OTU_6990	Unassigned	Unassigned	Unassigned	Unassigned	Unassigned	Unassigned	Unassigned	336	6	1.94282e-06	0	0	0	0	0	0	0	0	0	0	0	0	0	0	0	0	0	0	0	0	0	0	1	0	0	0	0	0	0	0	0	0	0	0	1	0	0	0	0
OTU_7001	Unassigned	Unassigned	Unassigned	Unassigned	Unassigned	Unassigned	Unassigned	352	6	1.94282e-06	0	0	0	0	0	0	0	0	0	0	0	0	0	0	0	0	0	0	0	0	0	0	0	0	0	0	0	0	0	0	0	0	0	0	0	0	0	0	0
OTU_7011	Unassigned	Unassigned	Unassigned	Unassigned	Unassigned	Unassigned	Unassigned	453	6	1.94282e-06	0	0	0	0	0	0	0	0	0	0	0	0	0	0	0	0	0	0	0	0	0	0	0	0	0	0	0	0	0	0	0	0	0	0	0	0	0	0	0
OTU_7107	Unassigned	Unassigned	Unassigned	Unassigned	Unassigned	Unassigned	Unassigned	349	6	1.94282e-06	0	0	0	0	6	0	0	0	0	0	0	0	0	0	0	0	0	0	0	0	0	0	0	0	0	0	0	0	0	0	0	0	0	0	0	0	0	0	0
OTU_7141	Unassigned	Unassigned	Unassigned	Unassigned	Unassigned	Unassigned	Unassigned	359	6	1.94282e-06	0	0	2	0	0	0	0	0	0	0	0	0	0	0	0	0	0	0	0	0	0	0	0	0	0	0	0	0	0	0	0	0	0	0	0	0	0	0	0
OTU_7202	Unassigned	Unassigned	Unassigned	Unassigned	Unassigned	Unassigned	Unassigned	349	6	1.94282e-06	0	0	0	0	0	0	0	0	6	0	0	0	0	0	0	0	0	0	0	0	0	0	0	0	0	0	0	0	0	0	0	0	0	0	0	0	0	0	0
OTU_7260	Unassigned	Unassigned	Unassigned	Unassigned	Unassigned	Unassigned	Unassigned	345	6	1.94282e-06	0	0	0	0	0	0	0	0	0	0	0	0	0	0	0	0	0	0	0	0	0	0	0	0	0	0	0	0	0	0	0	0	0	0	0	0	0	0	0
OTU_7295	Unassigned	Unassigned	Unassigned	Unassigned	Unassigned	Unassigned	Unassigned	323	6	1.94282e-06	0	0	0	2	0	0	0	0	0	0	0	0	0	0	0	0	0	0	0	0	0	0	0	0	0	0	0	0	0	0	0	0	0	0	0	0	0	0	0
OTU_7348	Unassigned	Unassigned	Unassigned	Unassigned	Unassigned	Unassigned	Unassigned	457	6	1.94282e-06	0	0	0	0	0	0	0	4	0	0	1	0	0	0	0	0	0	0	0	0	0	0	0	0	0	0	0	0	0	0	0	0	0	0	1	0	0	0	0
OTU_7373	Unassigned	Unassigned	Unassigned	Unassigned	Unassigned	Unassigned	Unassigned	334	6	1.94282e-06	0	0	0	0	0	0	0	0	0	0	0	0	0	0	0	0	0	0	0	0	0	0	0	0	0	0	0	0	0	0	0	0	0	0	0	0	0	0	0
OTU_7403	Unassigned	Unassigned	Unassigned	Unassigned	Unassigned	Unassigned	Unassigned	342	6	1.94282e-06	0	0	0	0	0	0	0	0	0	0	3	0	0	0	0	0	0	0	0	0	0	0	0	0	0	0	0	0	0	0	0	0	0	0	0	0	0	0	0
OTU_7448	Unassigned	Unassigned	Unassigned	Unassigned	Unassigned	Unassigned	Unassigned	345	6	1.94282e-06	0	0	0	0	0	0	0	0	0	0	0	0	0	0	0	0	0	0	0	0	0	0	0	0	0	0	0	0	0	0	0	0	0	0	0	0	0	0	0
OTU_7524	Unassigned	Unassigned	Unassigned	Unassigned	Unassigned	Unassigned	Unassigned	436	6	1.94282e-06	0	0	0	0	0	0	0	0	0	0	0	0	0	0	0	0	0	0	0	0	0	0	0	0	0	0	0	0	0	0	0	0	0	0	0	0	0	0	0
OTU_7609	Unassigned	Unassigned	Unassigned	Unassigned	Unassigned	Unassigned	Unassigned	419	6	1.94282e-06	0	0	0	0	0	0	0	0	0	0	0	0	0	0	0	0	0	0	0	0	0	0	0	0	0	0	0	0	0	0	0	0	0	0	0	0	0	0	0
OTU_7623	Unassigned	Unassigned	Unassigned	Unassigned	Unassigned	Unassigned	Unassigned	334	6	1.94282e-06	0	0	0	0	0	0	0	0	0	0	0	0	0	0	0	0	0	0	0	0	0	0	0	0	0	0	0	0	0	0	0	0	0	0	0	0	0	0	0
OTU_7633	Unassigned	Unassigned	Unassigned	Unassigned	Unassigned	Unassigned	Unassigned	463	6	1.94282e-06	0	0	1	0	0	0	0	0	0	0	0	0	0	0	0	0	0	0	0	0	0	0	0	0	0	0	0	0	0	0	0	0	0	0	0	0	0	0	0
OTU_7713	Unassigned	Unassigned	Unassigned	Unassigned	Unassigned	Unassigned	Unassigned	410	6	1.94282e-06	0	0	0	0	0	0	0	0	0	0	0	0	0	0	0	0	0	0	0	0	0	0	0	0	0	0	0	0	0	0	0	0	0	0	0	0	0	0	0
OTU_7812	Unassigned	Unassigned	Unassigned	Unassigned	Unassigned	Unassigned	Unassigned	362	6	1.94282e-06	0	0	0	0	0	0	0	0	0	0	0	0	0	0	0	0	0	0	0	0	0	0	0	0	0	0	0	0	0	0	0	0	0	0	0	0	0	0	0
OTU_7836	Unassigned	Unassigned	Unassigned	Unassigned	Unassigned	Unassigned	Unassigned	324	6	1.94282e-06	0	0	0	0	0	0	0	0	0	0	0	0	0	0	0	0	0	0	0	0	0	0	0	0	0	0	0	0	0	0	0	0	0	0	0	0	0	0	6
OTU_7879	Unassigned	Unassigned	Unassigned	Unassigned	Unassigned	Unassigned	Unassigned	443	6	1.94282e-06	0	0	0	0	0	0	0	0	0	0	0	0	0	0	0	0	0	0	0	0	0	0	0	0	0	0	5	0	0	0	0	0	0	0	0	0	0	0	0
OTU_7901	Unassigned	Unassigned	Unassigned	Unassigned	Unassigned	Unassigned	Unassigned	342	6	1.94282e-06	0	0	0	0	0	0	0	0	0	0	0	0	0	0	0	0	0	0	0	0	0	0	0	0	0	0	0	0	0	0	0	0	0	0	0	0	0	0	0
OTU_8016	Unassigned	Unassigned	Unassigned	Unassigned	Unassigned	Unassigned	Unassigned	363	6	1.94282e-06	0	0	0	0	0	0	0	0	0	0	0	0	0	0	0	0	0	0	0	0	0	0	0	0	0	0	0	0	0	0	0	0	0	0	6	0	0	0	0
OTU_8124	Unassigned	Unassigned	Unassigned	Unassigned	Unassigned	Unassigned	Unassigned	412	6	1.94282e-06	0	0	0	0	0	0	0	0	0	0	0	0	6	0	0	0	0	0	0	0	0	0	0	0	0	0	0	0	0	0	0	0	0	0	0	0	0	0	0
OTU_8181	Unassigned	Unassigned	Unassigned	Unassigned	Unassigned	Unassigned	Unassigned	358	6	1.94282e-06	0	0	0	0	0	0	0	0	0	0	0	0	0	0	0	0	0	0	0	0	0	0	0	0	0	0	0	0	0	0	0	4	0	0	0	1	0	0	0
OTU_8182	Unassigned	Unassigned	Unassigned	Unassigned	Unassigned	Unassigned	Unassigned	337	6	1.94282e-06	0	0	0	0	0	0	0	0	0	0	0	0	0	0	0	0	0	0	0	0	0	0	0	5	0	0	0	0	0	0	0	0	0	0	0	0	0	0	0
OTU_8195	Unassigned	Unassigned	Unassigned	Unassigned	Unassigned	Unassigned	Unassigned	360	6	1.94282e-06	0	0	0	0	0	0	0	0	0	0	0	0	0	0	0	0	0	0	0	0	0	0	6	0	0	0	0	0	0	0	0	0	0	0	0	0	0	0	0
OTU_8198	Unassigned	Unassigned	Unassigned	Unassigned	Unassigned	Unassigned	Unassigned	345	6	1.94282e-06	0	0	0	0	0	0	0	0	0	0	0	0	0	0	0	0	0	0	0	0	0	0	0	2	0	0	0	0	0	0	0	0	0	4	0	0	0	0	0
OTU_8244	Unassigned	Unassigned	Unassigned	Unassigned	Unassigned	Unassigned	Unassigned	324	6	1.94282e-06	0	0	0	0	0	0	0	0	0	0	0	0	0	0	0	0	0	0	0	0	0	0	0	0	0	0	0	0	0	0	0	0	0	0	0	6	0	0	0
OTU_8383	Unassigned	Unassigned	Unassigned	Unassigned	Unassigned	Unassigned	Unassigned	344	6	1.94282e-06	6	0	0	0	0	0	0	0	0	0	0	0	0	0	0	0	0	0	0	0	0	0	0	0	0	0	0	0	0	0	0	0	0	0	0	0	0	0	0
OTU_8392	Unassigned	Unassigned	Unassigned	Unassigned	Unassigned	Unassigned	Unassigned	339	6	1.94282e-06	0	0	0	0	0	0	0	0	0	0	0	0	0	0	0	0	0	0	0	0	0	0	0	0	0	0	0	0	0	0	0	0	0	0	6	0	0	0	0
OTU_8516	Unassigned	Unassigned	Unassigned	Unassigned	Unassigned	Unassigned	Unassigned	475	6	1.94282e-06	0	0	0	0	0	0	0	0	0	0	0	0	0	0	0	0	0	0	0	0	0	0	0	2	0	0	0	0	0	0	0	0	0	0	0	0	0	0	0
OTU_8520	Unassigned	Unassigned	Unassigned	Unassigned	Unassigned	Unassigned	Unassigned	354	6	1.94282e-06	0	0	0	0	0	0	0	0	0	0	0	0	0	0	0	0	0	0	0	0	0	0	0	0	0	0	0	0	0	0	0	0	0	0	0	0	0	0	0
OTU_8621	Unassigned	Unassigned	Unassigned	Unassigned	Unassigned	Unassigned	Unassigned	333	6	1.94282e-06	0	0	0	0	0	0	0	0	0	0	0	0	0	0	0	0	0	0	0	0	0	0	0	0	0	0	0	0	0	0	0	0	0	0	0	0	0	0	0
OTU_8716	Unassigned	Unassigned	Unassigned	Unassigned	Unassigned	Unassigned	Unassigned	407	6	1.94282e-06	0	0	0	0	0	0	0	0	0	0	0	0	0	0	0	0	0	0	0	0	0	0	0	2	0	0	0	0	0	0	0	0	0	0	0	0	0	0	0
OTU_8743	Unassigned	Unassigned	Unassigned	Unassigned	Unassigned	Unassigned	Unassigned	316	6	1.94282e-06	0	0	0	4	0	0	0	0	0	0	0	0	0	0	0	0	0	0	0	0	0	0	0	0	0	0	0	0	0	0	0	0	0	0	0	0	0	0	0
OTU_8744	Unassigned	Unassigned	Unassigned	Unassigned	Unassigned	Unassigned	Unassigned	337	6	1.94282e-06	0	0	0	0	6	0	0	0	0	0	0	0	0	0	0	0	0	0	0	0	0	0	0	0	0	0	0	0	0	0	0	0	0	0	0	0	0	0	0
OTU_8895	Unassigned	Unassigned	Unassigned	Unassigned	Unassigned	Unassigned	Unassigned	455	6	1.94282e-06	0	0	0	0	0	0	0	0	0	0	0	0	0	0	0	0	0	0	0	0	0	0	0	0	0	0	0	0	0	0	0	0	0	0	0	0	0	0	0
OTU_3540	Unassigned	Unassigned	Unassigned	Unassigned	Unassigned	Unassigned	Unassigned	344	5	1.61902e-06	0	0	0	0	0	0	0	0	0	0	0	0	0	0	0	0	0	0	0	0	0	0	0	0	0	0	0	0	0	0	0	0	0	0	0	0	0	0	0
OTU_3607	Unassigned	Unassigned	Unassigned	Unassigned	Unassigned	Unassigned	Unassigned	289	5	1.61902e-06	0	0	0	0	0	0	0	0	0	0	0	0	0	0	0	0	0	0	0	0	0	0	0	0	0	0	0	0	0	0	0	5	0	0	0	0	0	0	0
OTU_3709	Unassigned	Unassigned	Unassigned	Unassigned	Unassigned	Unassigned	Unassigned	255	5	1.61902e-06	0	0	0	0	0	0	0	0	0	0	0	0	0	0	0	0	0	0	0	0	0	0	0	0	0	0	0	0	0	0	0	0	0	0	0	5	0	0	0
OTU_3738	Unassigned	Unassigned	Unassigned	Unassigned	Unassigned	Unassigned	Unassigned	339	5	1.61902e-06	0	0	0	0	0	0	0	0	0	0	0	0	0	0	0	0	0	0	0	0	0	0	0	0	0	0	0	0	0	0	0	0	0	0	0	0	0	0	0
OTU_3762	Unassigned	Unassigned	Unassigned	Unassigned	Unassigned	Unassigned	Unassigned	259	5	1.61902e-06	0	0	0	0	0	0	0	0	0	0	0	0	0	0	0	0	0	0	0	0	0	0	0	4	0	0	0	0	0	0	0	0	0	0	0	0	0	0	0
OTU_3884	Unassigned	Unassigned	Unassigned	Unassigned	Unassigned	Unassigned	Unassigned	341	5	1.61902e-06	0	0	0	0	0	0	0	0	0	0	0	0	0	0	0	0	0	0	0	0	0	0	0	0	0	0	5	0	0	0	0	0	0	0	0	0	0	0	0
OTU_3926	Unassigned	Unassigned	Unassigned	Unassigned	Unassigned	Unassigned	Unassigned	343	5	1.61902e-06	0	0	0	0	0	0	0	0	0	0	0	0	0	0	0	0	2	3	0	0	0	0	0	0	0	0	0	0	0	0	0	0	0	0	0	0	0	0	0
OTU_3957	Unassigned	Unassigned	Unassigned	Unassigned	Unassigned	Unassigned	Unassigned	282	5	1.61902e-06	0	0	0	0	0	0	0	0	0	0	0	0	0	0	0	0	0	0	0	0	0	0	0	0	0	0	0	0	0	0	0	0	0	0	0	0	0	0	0
OTU_3964	Unassigned	Unassigned	Unassigned	Unassigned	Unassigned	Unassigned	Unassigned	344	5	1.61902e-06	0	0	0	0	0	0	0	0	0	0	0	0	0	0	0	0	0	0	0	0	0	0	0	5	0	0	0	0	0	0	0	0	0	0	0	0	0	0	0
OTU_3970	Unassigned	Unassigned	Unassigned	Unassigned	Unassigned	Unassigned	Unassigned	346	5	1.61902e-06	0	0	0	0	0	0	0	0	0	0	0	0	0	0	0	0	0	0	0	0	0	0	0	0	0	0	0	0	0	0	0	0	0	0	5	0	0	0	0
OTU_4013	Unassigned	Unassigned	Unassigned	Unassigned	Unassigned	Unassigned	Unassigned	356	5	1.61902e-06	0	0	0	0	0	0	0	5	0	0	0	0	0	0	0	0	0	0	0	0	0	0	0	0	0	0	0	0	0	0	0	0	0	0	0	0	0	0	0
OTU_4119	Unassigned	Unassigned	Unassigned	Unassigned	Unassigned	Unassigned	Unassigned	333	5	1.61902e-06	0	0	0	0	0	0	0	0	0	0	0	0	0	0	0	0	0	0	0	0	0	0	0	0	0	0	0	0	0	0	0	0	0	0	0	0	0	0	0
OTU_4135	Unassigned	Unassigned	Unassigned	Unassigned	Unassigned	Unassigned	Unassigned	299	5	1.61902e-06	0	0	0	0	0	0	0	0	0	0	0	0	0	0	0	0	0	0	0	0	0	0	0	0	0	0	0	0	0	0	0	0	0	0	0	0	0	0	0
OTU_4219	Unassigned	Unassigned	Unassigned	Unassigned	Unassigned	Unassigned	Unassigned	364	5	1.61902e-06	0	0	0	0	0	0	0	0	0	0	0	0	0	0	0	0	0	0	0	0	0	0	0	0	0	0	0	0	0	0	0	0	0	0	0	0	0	0	0
OTU_4279	Unassigned	Unassigned	Unassigned	Unassigned	Unassigned	Unassigned	Unassigned	356	5	1.61902e-06	0	0	0	0	0	0	0	0	0	0	0	0	0	0	0	0	0	0	0	0	0	0	0	0	0	0	0	0	0	0	5	0	0	0	0	0	0	0	0
OTU_4324	Unassigned	Unassigned	Unassigned	Unassigned	Unassigned	Unassigned	Unassigned	357	5	1.61902e-06	0	0	0	0	0	0	0	0	0	0	0	0	0	0	0	0	0	0	0	0	0	0	0	0	0	0	0	0	0	0	0	0	0	0	0	0	0	0	0
OTU_4337	Unassigned	Unassigned	Unassigned	Unassigned	Unassigned	Unassigned	Unassigned	362	5	1.61902e-06	0	0	0	0	0	0	0	0	0	0	0	0	0	0	0	0	0	0	0	0	0	0	0	0	0	0	0	0	0	0	0	0	0	0	0	0	0	0	0
OTU_4347	Unassigned	Unassigned	Unassigned	Unassigned	Unassigned	Unassigned	Unassigned	321	5	1.61902e-06	0	0	0	0	0	0	0	5	0	0	0	0	0	0	0	0	0	0	0	0	0	0	0	0	0	0	0	0	0	0	0	0	0	0	0	0	0	0	0
OTU_4353	Unassigned	Unassigned	Unassigned	Unassigned	Unassigned	Unassigned	Unassigned	365	5	1.61902e-06	5	0	0	0	0	0	0	0	0	0	0	0	0	0	0	0	0	0	0	0	0	0	0	0	0	0	0	0	0	0	0	0	0	0	0	0	0	0	0
OTU_4368	Unassigned	Unassigned	Unassigned	Unassigned	Unassigned	Unassigned	Unassigned	386	5	1.61902e-06	0	0	0	0	0	0	0	0	0	0	0	0	0	0	0	0	0	0	5	0	0	0	0	0	0	0	0	0	0	0	0	0	0	0	0	0	0	0	0
OTU_4371	Unassigned	Unassigned	Unassigned	Unassigned	Unassigned	Unassigned	Unassigned	308	5	1.61902e-06	0	0	0	0	0	0	0	0	0	0	0	0	0	0	0	0	0	0	0	0	0	0	0	0	0	0	0	0	0	0	0	0	0	0	0	0	0	0	0
OTU_4543	Unassigned	Unassigned	Unassigned	Unassigned	Unassigned	Unassigned	Unassigned	345	5	1.61902e-06	0	0	0	0	0	0	0	0	0	0	0	0	0	0	0	0	0	0	0	0	0	0	0	0	2	0	0	0	0	0	0	0	0	0	0	0	0	0	0
OTU_4594	Unassigned	Unassigned	Unassigned	Unassigned	Unassigned	Unassigned	Unassigned	437	5	1.61902e-06	0	0	0	0	0	0	0	0	0	0	0	0	0	0	0	0	0	0	0	0	0	0	0	0	0	0	0	0	0	0	0	0	0	0	0	0	5	0	0
OTU_4624	Unassigned	Unassigned	Unassigned	Unassigned	Unassigned	Unassigned	Unassigned	347	5	1.61902e-06	0	0	0	0	0	0	0	0	0	0	0	0	0	0	0	0	0	0	0	0	0	0	0	0	0	0	0	0	0	0	0	0	0	0	0	0	0	0	0
OTU_4649	Unassigned	Unassigned	Unassigned	Unassigned	Unassigned	Unassigned	Unassigned	435	5	1.61902e-06	0	0	0	0	0	0	0	5	0	0	0	0	0	0	0	0	0	0	0	0	0	0	0	0	0	0	0	0	0	0	0	0	0	0	0	0	0	0	0
OTU_4699	Unassigned	Unassigned	Unassigned	Unassigned	Unassigned	Unassigned	Unassigned	335	5	1.61902e-06	0	0	0	0	0	0	0	0	0	0	0	0	0	0	0	0	0	0	0	0	0	0	0	0	0	0	0	0	0	0	0	0	0	0	0	0	0	0	0
OTU_4741	Unassigned	Unassigned	Unassigned	Unassigned	Unassigned	Unassigned	Unassigned	411	5	1.61902e-06	0	0	0	0	0	0	0	0	0	0	0	0	5	0	0	0	0	0	0	0	0	0	0	0	0	0	0	0	0	0	0	0	0	0	0	0	0	0	0
OTU_4799	Unassigned	Unassigned	Unassigned	Unassigned	Unassigned	Unassigned	Unassigned	325	5	1.61902e-06	0	0	0	0	0	0	0	0	0	0	0	0	0	0	0	0	0	0	0	0	0	0	0	0	0	0	0	0	0	0	0	0	0	0	0	0	0	0	0
OTU_4801	Unassigned	Unassigned	Unassigned	Unassigned	Unassigned	Unassigned	Unassigned	346	5	1.61902e-06	0	0	4	0	0	0	0	0	0	0	0	0	0	0	0	0	0	0	0	0	0	0	0	0	0	0	0	0	0	0	0	0	0	0	0	0	0	0	0
OTU_4802	Unassigned	Unassigned	Unassigned	Unassigned	Unassigned	Unassigned	Unassigned	297	5	1.61902e-06	0	0	0	0	0	0	0	0	0	0	0	0	0	0	0	0	0	0	0	0	0	0	0	0	0	0	0	0	0	0	0	0	0	0	0	0	0	0	0
OTU_4836	Unassigned	Unassigned	Unassigned	Unassigned	Unassigned	Unassigned	Unassigned	343	5	1.61902e-06	0	0	0	0	0	0	0	0	0	0	0	0	0	0	0	0	0	2	0	0	0	0	0	0	0	0	0	0	0	0	0	0	0	0	0	0	0	0	0
OTU_4859	Unassigned	Unassigned	Unassigned	Unassigned	Unassigned	Unassigned	Unassigned	253	5	1.61902e-06	0	0	0	0	0	0	0	0	0	0	0	0	0	0	0	0	0	0	0	0	0	0	0	0	0	0	0	0	0	0	0	0	0	0	0	0	0	0	0
OTU_4867	Unassigned	Unassigned	Unassigned	Unassigned	Unassigned	Unassigned	Unassigned	344	5	1.61902e-06	0	0	0	0	0	0	0	0	0	0	0	0	0	0	0	0	0	5	0	0	0	0	0	0	0	0	0	0	0	0	0	0	0	0	0	0	0	0	0
OTU_4885	Unassigned	Unassigned	Unassigned	Unassigned	Unassigned	Unassigned	Unassigned	344	5	1.61902e-06	0	0	0	0	0	0	0	0	0	0	0	0	0	0	0	0	0	0	0	0	0	0	0	0	0	0	0	0	0	0	0	0	0	0	0	0	0	0	0
OTU_4886	Unassigned	Unassigned	Unassigned	Unassigned	Unassigned	Unassigned	Unassigned	354	5	1.61902e-06	0	0	0	0	0	0	0	0	0	0	0	0	0	0	0	0	0	0	0	0	0	0	0	0	0	0	0	0	0	0	0	0	0	0	0	0	0	0	0
OTU_4902	Unassigned	Unassigned	Unassigned	Unassigned	Unassigned	Unassigned	Unassigned	332	5	1.61902e-06	0	0	0	0	0	0	0	0	0	0	0	0	0	0	0	0	0	0	0	0	0	0	0	0	0	0	0	0	0	0	0	0	0	0	0	0	0	0	0
OTU_4917	Unassigned	Unassigned	Unassigned	Unassigned	Unassigned	Unassigned	Unassigned	343	5	1.61902e-06	0	0	0	0	0	0	0	0	0	0	0	0	0	0	0	0	0	0	0	0	0	0	0	0	0	0	0	0	0	0	0	0	0	0	0	0	0	0	0
OTU_4924	Unassigned	Unassigned	Unassigned	Unassigned	Unassigned	Unassigned	Unassigned	356	5	1.61902e-06	0	0	0	0	0	0	0	0	0	0	0	0	0	0	0	0	0	0	0	0	0	0	0	0	0	0	0	0	0	0	0	0	0	0	0	0	0	0	0
OTU_4939	Unassigned	Unassigned	Unassigned	Unassigned	Unassigned	Unassigned	Unassigned	361	5	1.61902e-06	0	0	0	0	0	0	0	0	0	0	0	0	0	0	0	0	0	0	0	0	0	0	0	0	0	0	0	0	0	0	0	0	0	0	0	0	0	0	0
OTU_4986	Unassigned	Unassigned	Unassigned	Unassigned	Unassigned	Unassigned	Unassigned	448	5	1.61902e-06	0	0	0	0	0	0	0	0	0	0	0	0	5	0	0	0	0	0	0	0	0	0	0	0	0	0	0	0	0	0	0	0	0	0	0	0	0	0	0
OTU_4989	Unassigned	Unassigned	Unassigned	Unassigned	Unassigned	Unassigned	Unassigned	357	5	1.61902e-06	0	0	0	0	0	0	0	0	0	0	0	0	0	0	0	0	0	0	0	0	0	0	0	0	0	0	0	0	0	0	0	0	0	0	0	0	0	0	0
OTU_5021	Unassigned	Unassigned	Unassigned	Unassigned	Unassigned	Unassigned	Unassigned	342	5	1.61902e-06	0	0	0	0	0	0	0	0	0	0	0	0	0	0	0	0	0	0	0	0	0	0	0	0	0	0	0	0	0	0	0	0	0	0	0	0	0	0	0
OTU_5023	Unassigned	Unassigned	Unassigned	Unassigned	Unassigned	Unassigned	Unassigned	367	5	1.61902e-06	0	0	0	0	0	0	0	0	0	0	0	0	0	0	0	0	0	0	0	0	0	0	0	0	0	0	0	0	0	0	0	0	0	0	0	0	0	0	0
OTU_5058	Unassigned	Unassigned	Unassigned	Unassigned	Unassigned	Unassigned	Unassigned	342	5	1.61902e-06	0	0	0	0	0	0	0	0	0	0	0	0	0	0	0	0	0	0	0	0	0	0	0	0	0	0	0	0	0	0	0	0	0	0	0	0	0	0	0
OTU_5187	Unassigned	Unassigned	Unassigned	Unassigned	Unassigned	Unassigned	Unassigned	345	5	1.61902e-06	0	0	0	0	0	0	0	0	0	0	0	0	0	0	0	0	0	0	0	0	0	0	0	0	0	0	0	0	0	0	0	0	0	0	5	0	0	0	0
OTU_5193	Unassigned	Unassigned	Unassigned	Unassigned	Unassigned	Unassigned	Unassigned	413	5	1.61902e-06	0	0	0	0	0	0	0	0	0	0	0	0	0	0	0	0	0	0	0	0	0	0	0	0	0	0	0	0	0	0	0	0	0	0	0	0	0	0	0
OTU_5294	Unassigned	Unassigned	Unassigned	Unassigned	Unassigned	Unassigned	Unassigned	381	5	1.61902e-06	0	0	0	0	0	0	0	5	0	0	0	0	0	0	0	0	0	0	0	0	0	0	0	0	0	0	0	0	0	0	0	0	0	0	0	0	0	0	0
OTU_5408	Unassigned	Unassigned	Unassigned	Unassigned	Unassigned	Unassigned	Unassigned	336	5	1.61902e-06	0	0	0	0	0	0	0	0	0	0	0	0	0	0	0	0	0	0	0	0	0	0	0	0	0	0	0	0	0	0	0	0	0	0	0	0	0	0	0
OTU_5409	Unassigned	Unassigned	Unassigned	Unassigned	Unassigned	Unassigned	Unassigned	357	5	1.61902e-06	0	0	0	0	0	0	0	0	0	0	0	0	0	0	0	0	0	0	0	0	0	0	5	0	0	0	0	0	0	0	0	0	0	0	0	0	0	0	0
OTU_5446	Unassigned	Unassigned	Unassigned	Unassigned	Unassigned	Unassigned	Unassigned	396	5	1.61902e-06	0	0	0	0	0	0	0	0	0	0	0	0	0	0	5	0	0	0	0	0	0	0	0	0	0	0	0	0	0	0	0	0	0	0	0	0	0	0	0
OTU_5454	Unassigned	Unassigned	Unassigned	Unassigned	Unassigned	Unassigned	Unassigned	325	5	1.61902e-06	0	0	0	0	0	0	0	0	0	0	0	0	0	0	0	0	0	0	0	0	0	0	0	0	0	0	0	0	0	0	0	0	0	0	5	0	0	0	0
OTU_5483	Unassigned	Unassigned	Unassigned	Unassigned	Unassigned	Unassigned	Unassigned	431	5	1.61902e-06	0	0	5	0	0	0	0	0	0	0	0	0	0	0	0	0	0	0	0	0	0	0	0	0	0	0	0	0	0	0	0	0	0	0	0	0	0	0	0
OTU_5524	Unassigned	Unassigned	Unassigned	Unassigned	Unassigned	Unassigned	Unassigned	341	5	1.61902e-06	0	0	0	0	0	0	0	0	0	0	0	0	0	0	0	0	0	0	0	0	0	0	0	0	0	0	0	0	0	0	0	0	0	0	0	0	0	0	0
OTU_5531	Unassigned	Unassigned	Unassigned	Unassigned	Unassigned	Unassigned	Unassigned	334	5	1.61902e-06	0	0	0	0	0	0	0	0	0	0	0	0	0	0	0	0	0	0	0	0	0	0	0	0	0	0	0	0	0	0	0	0	0	0	0	0	0	0	0
OTU_5547	Unassigned	Unassigned	Unassigned	Unassigned	Unassigned	Unassigned	Unassigned	330	5	1.61902e-06	0	0	0	0	0	0	0	0	0	0	0	0	0	0	0	0	0	0	0	0	0	0	0	0	0	0	0	0	0	0	0	0	0	0	0	0	0	0	0
OTU_5557	Unassigned	Unassigned	Unassigned	Unassigned	Unassigned	Unassigned	Unassigned	362	5	1.61902e-06	0	0	0	0	0	0	0	0	0	0	0	0	0	0	0	0	0	0	0	0	0	0	0	0	0	0	0	0	0	0	0	0	0	0	0	0	0	0	0
OTU_5617	Unassigned	Unassigned	Unassigned	Unassigned	Unassigned	Unassigned	Unassigned	352	5	1.61902e-06	0	0	0	0	0	0	0	0	0	0	0	0	0	3	0	0	0	0	0	1	0	0	0	0	0	0	0	0	0	0	0	0	0	0	0	1	0	0	0
OTU_5643	Unassigned	Unassigned	Unassigned	Unassigned	Unassigned	Unassigned	Unassigned	345	5	1.61902e-06	0	0	0	0	0	0	0	0	0	0	0	0	0	0	0	0	0	0	0	0	0	0	0	0	0	0	0	0	0	0	0	0	0	0	5	0	0	0	0
OTU_5648	Unassigned	Unassigned	Unassigned	Unassigned	Unassigned	Unassigned	Unassigned	335	5	1.61902e-06	0	0	0	0	0	0	0	0	0	0	0	0	0	0	0	0	0	0	0	0	0	0	0	0	0	0	0	0	0	0	0	0	0	0	0	0	0	0	0
OTU_5693	Unassigned	Unassigned	Unassigned	Unassigned	Unassigned	Unassigned	Unassigned	435	5	1.61902e-06	0	0	0	0	0	0	0	0	0	0	0	0	0	0	0	0	0	0	0	0	0	0	0	0	0	0	0	0	0	0	0	0	0	0	0	0	0	0	0
OTU_5696	Unassigned	Unassigned	Unassigned	Unassigned	Unassigned	Unassigned	Unassigned	357	5	1.61902e-06	0	0	0	0	0	0	0	0	0	0	0	0	0	0	0	0	0	0	0	0	0	0	0	0	0	0	0	0	0	0	0	0	0	0	0	0	0	0	0
OTU_5714	Unassigned	Unassigned	Unassigned	Unassigned	Unassigned	Unassigned	Unassigned	338	5	1.61902e-06	0	0	0	0	0	0	0	0	0	0	0	0	0	0	0	0	0	0	0	0	0	0	0	0	0	0	0	0	0	0	0	0	0	0	0	0	0	0	0
OTU_5748	Unassigned	Unassigned	Unassigned	Unassigned	Unassigned	Unassigned	Unassigned	333	5	1.61902e-06	0	0	0	0	0	0	0	0	0	0	0	0	0	0	0	0	0	5	0	0	0	0	0	0	0	0	0	0	0	0	0	0	0	0	0	0	0	0	0
OTU_5767	Unassigned	Unassigned	Unassigned	Unassigned	Unassigned	Unassigned	Unassigned	325	5	1.61902e-06	0	0	0	5	0	0	0	0	0	0	0	0	0	0	0	0	0	0	0	0	0	0	0	0	0	0	0	0	0	0	0	0	0	0	0	0	0	0	0
OTU_5790	Unassigned	Unassigned	Unassigned	Unassigned	Unassigned	Unassigned	Unassigned	350	5	1.61902e-06	0	0	0	0	0	0	0	0	0	0	0	0	0	0	0	0	0	0	0	0	0	0	0	0	0	0	0	0	0	0	0	0	0	0	5	0	0	0	0
OTU_5791	Unassigned	Unassigned	Unassigned	Unassigned	Unassigned	Unassigned	Unassigned	343	5	1.61902e-06	0	0	0	0	0	0	0	0	0	0	0	0	0	0	0	0	0	0	0	0	0	0	0	0	0	0	0	0	0	0	0	0	0	0	0	0	0	0	0
OTU_5885	Unassigned	Unassigned	Unassigned	Unassigned	Unassigned	Unassigned	Unassigned	359	5	1.61902e-06	0	0	0	0	0	0	0	0	0	0	0	0	0	0	0	0	0	0	0	0	0	0	0	0	0	0	0	0	0	0	0	0	0	0	0	0	0	0	0
OTU_5902	Unassigned	Unassigned	Unassigned	Unassigned	Unassigned	Unassigned	Unassigned	385	5	1.61902e-06	0	0	0	0	0	0	0	0	0	0	0	0	0	0	0	0	0	0	0	0	0	0	0	0	0	0	0	0	0	5	0	0	0	0	0	0	0	0	0
OTU_5938	Unassigned	Unassigned	Unassigned	Unassigned	Unassigned	Unassigned	Unassigned	343	5	1.61902e-06	0	0	0	0	0	0	0	0	0	0	0	0	0	0	0	0	0	0	0	0	0	0	0	0	0	0	0	0	0	0	0	0	0	0	0	0	0	0	0
OTU_5955	Unassigned	Unassigned	Unassigned	Unassigned	Unassigned	Unassigned	Unassigned	344	5	1.61902e-06	0	0	0	0	0	0	0	0	0	0	0	0	0	0	0	0	0	0	0	0	0	0	0	0	0	0	0	0	0	0	0	4	0	0	0	0	0	0	0
OTU_6095	Unassigned	Unassigned	Unassigned	Unassigned	Unassigned	Unassigned	Unassigned	260	5	1.61902e-06	0	0	0	0	0	0	0	0	0	0	0	0	0	0	0	0	0	0	0	0	0	0	0	0	0	0	0	0	0	0	0	0	0	0	0	0	0	0	0
OTU_6133	Unassigned	Unassigned	Unassigned	Unassigned	Unassigned	Unassigned	Unassigned	358	5	1.61902e-06	0	0	0	0	0	0	0	0	0	0	0	0	0	0	0	0	0	0	0	0	0	0	0	0	0	0	0	0	0	0	0	0	0	0	0	0	0	0	0
OTU_6145	Unassigned	Unassigned	Unassigned	Unassigned	Unassigned	Unassigned	Unassigned	352	5	1.61902e-06	0	0	0	0	0	0	0	0	0	0	0	0	0	0	0	0	0	0	0	0	0	0	0	0	0	0	0	0	0	0	0	0	0	0	0	0	0	0	0
OTU_6199	Unassigned	Unassigned	Unassigned	Unassigned	Unassigned	Unassigned	Unassigned	336	5	1.61902e-06	0	0	0	0	0	0	0	0	0	0	0	0	0	0	0	0	0	0	0	0	0	0	0	0	0	0	0	0	0	0	0	0	0	0	0	0	0	0	0
OTU_6207	Unassigned	Unassigned	Unassigned	Unassigned	Unassigned	Unassigned	Unassigned	283	5	1.61902e-06	0	0	0	0	0	0	0	0	0	0	0	0	0	0	0	0	0	0	0	0	0	0	0	0	0	0	0	0	0	0	0	0	0	0	0	0	0	0	0
OTU_6228	Unassigned	Unassigned	Unassigned	Unassigned	Unassigned	Unassigned	Unassigned	364	5	1.61902e-06	0	0	0	0	0	0	0	0	0	0	0	0	0	0	0	0	0	0	0	0	0	0	0	0	0	0	0	0	0	0	0	0	0	0	0	0	0	0	0
OTU_6251	Unassigned	Unassigned	Unassigned	Unassigned	Unassigned	Unassigned	Unassigned	341	5	1.61902e-06	0	0	0	0	0	0	0	0	0	0	0	0	0	0	0	0	0	0	0	0	0	0	0	0	0	0	0	0	0	0	0	0	0	0	0	0	0	0	0
OTU_6273	Unassigned	Unassigned	Unassigned	Unassigned	Unassigned	Unassigned	Unassigned	320	5	1.61902e-06	0	0	0	0	0	0	0	0	0	0	0	0	0	0	0	0	0	5	0	0	0	0	0	0	0	0	0	0	0	0	0	0	0	0	0	0	0	0	0
OTU_6277	Unassigned	Unassigned	Unassigned	Unassigned	Unassigned	Unassigned	Unassigned	310	5	1.61902e-06	0	0	0	0	0	0	0	1	0	0	0	0	0	0	0	0	0	0	0	0	0	0	0	0	0	0	0	0	0	0	0	0	0	4	0	0	0	0	0
OTU_6285	Unassigned	Unassigned	Unassigned	Unassigned	Unassigned	Unassigned	Unassigned	288	5	1.61902e-06	0	0	0	0	0	0	0	0	0	0	0	0	5	0	0	0	0	0	0	0	0	0	0	0	0	0	0	0	0	0	0	0	0	0	0	0	0	0	0
OTU_6288	Unassigned	Unassigned	Unassigned	Unassigned	Unassigned	Unassigned	Unassigned	344	5	1.61902e-06	0	0	0	0	0	0	0	0	0	0	0	0	0	0	0	0	0	0	0	0	0	0	0	0	5	0	0	0	0	0	0	0	0	0	0	0	0	0	0
OTU_6289	Unassigned	Unassigned	Unassigned	Unassigned	Unassigned	Unassigned	Unassigned	335	5	1.61902e-06	0	0	0	0	0	0	0	0	0	0	0	0	0	0	0	0	0	0	0	0	0	0	0	0	0	0	0	0	0	0	0	0	0	0	0	0	0	0	0
OTU_6290	Unassigned	Unassigned	Unassigned	Unassigned	Unassigned	Unassigned	Unassigned	351	5	1.61902e-06	0	0	0	0	0	0	0	0	0	0	0	0	0	0	0	0	0	0	0	0	0	0	0	0	0	0	0	0	0	0	0	0	0	0	0	0	0	0	0
OTU_6294	Unassigned	Unassigned	Unassigned	Unassigned	Unassigned	Unassigned	Unassigned	327	5	1.61902e-06	0	0	0	0	0	0	0	0	0	0	0	0	0	0	0	0	0	0	0	0	0	0	0	0	0	0	0	0	0	0	0	0	0	0	0	0	0	0	0
OTU_6326	Unassigned	Unassigned	Unassigned	Unassigned	Unassigned	Unassigned	Unassigned	347	5	1.61902e-06	5	0	0	0	0	0	0	0	0	0	0	0	0	0	0	0	0	0	0	0	0	0	0	0	0	0	0	0	0	0	0	0	0	0	0	0	0	0	0
OTU_6371	Unassigned	Unassigned	Unassigned	Unassigned	Unassigned	Unassigned	Unassigned	340	5	1.61902e-06	0	0	0	0	0	0	0	0	0	0	0	0	0	0	0	0	0	0	0	0	0	0	0	0	0	0	0	0	0	0	0	0	0	0	0	0	0	0	0
OTU_6383	Unassigned	Unassigned	Unassigned	Unassigned	Unassigned	Unassigned	Unassigned	343	5	1.61902e-06	5	0	0	0	0	0	0	0	0	0	0	0	0	0	0	0	0	0	0	0	0	0	0	0	0	0	0	0	0	0	0	0	0	0	0	0	0	0	0
OTU_6406	Unassigned	Unassigned	Unassigned	Unassigned	Unassigned	Unassigned	Unassigned	349	5	1.61902e-06	0	0	0	0	0	0	0	0	0	0	0	0	0	0	0	0	0	0	0	0	0	0	0	0	0	0	0	0	0	0	0	0	0	0	0	0	0	5	0
OTU_6419	Unassigned	Unassigned	Unassigned	Unassigned	Unassigned	Unassigned	Unassigned	440	5	1.61902e-06	0	0	0	0	0	0	0	0	0	0	0	0	0	0	0	0	0	0	0	0	0	0	0	0	0	0	0	0	0	0	0	0	0	0	0	0	0	0	0
OTU_6591	Unassigned	Unassigned	Unassigned	Unassigned	Unassigned	Unassigned	Unassigned	350	5	1.61902e-06	0	0	0	0	0	0	0	0	0	0	0	0	0	0	0	0	0	0	0	0	0	0	0	0	0	0	0	0	0	0	0	0	0	0	0	0	0	0	0
OTU_6631	Unassigned	Unassigned	Unassigned	Unassigned	Unassigned	Unassigned	Unassigned	267	5	1.61902e-06	0	0	0	0	0	0	0	0	0	0	0	0	0	0	0	0	0	0	0	0	0	0	0	0	0	0	0	0	0	0	0	0	0	0	0	0	0	0	0
OTU_6633	Unassigned	Unassigned	Unassigned	Unassigned	Unassigned	Unassigned	Unassigned	313	5	1.61902e-06	0	1	0	0	0	0	1	0	0	0	0	0	0	0	0	0	0	0	0	0	0	0	3	0	0	0	0	0	0	0	0	0	0	0	0	0	0	0	0
OTU_6654	Unassigned	Unassigned	Unassigned	Unassigned	Unassigned	Unassigned	Unassigned	341	5	1.61902e-06	0	0	3	0	0	0	0	0	0	0	0	0	0	0	0	0	0	0	0	0	0	0	0	0	0	2	0	0	0	0	0	0	0	0	0	0	0	0	0
OTU_6695	Unassigned	Unassigned	Unassigned	Unassigned	Unassigned	Unassigned	Unassigned	345	5	1.61902e-06	0	0	0	0	0	0	0	0	0	0	0	0	0	0	0	0	0	0	0	0	0	0	0	0	0	0	0	0	0	0	0	0	0	0	0	0	0	0	0
OTU_6837	Unassigned	Unassigned	Unassigned	Unassigned	Unassigned	Unassigned	Unassigned	333	5	1.61902e-06	0	0	0	0	0	0	0	0	0	0	0	0	0	0	0	0	0	0	0	0	0	0	0	0	0	0	0	0	0	0	0	0	0	0	0	0	0	0	0
OTU_6848	Unassigned	Unassigned	Unassigned	Unassigned	Unassigned	Unassigned	Unassigned	345	5	1.61902e-06	0	0	0	0	0	0	0	0	0	0	0	0	0	0	0	0	0	0	0	0	0	0	0	0	0	0	0	0	0	0	0	0	0	0	0	0	0	0	0
OTU_6900	Unassigned	Unassigned	Unassigned	Unassigned	Unassigned	Unassigned	Unassigned	332	5	1.61902e-06	0	0	0	0	0	0	0	0	0	0	0	0	0	0	0	0	0	0	0	0	0	0	0	0	0	0	0	0	0	0	0	0	0	0	0	0	0	0	0
OTU_6964	Unassigned	Unassigned	Unassigned	Unassigned	Unassigned	Unassigned	Unassigned	463	5	1.61902e-06	0	0	0	0	0	0	0	0	0	0	0	0	0	0	0	0	0	0	0	0	0	0	0	0	0	0	0	0	0	0	0	0	0	0	0	0	0	0	0
OTU_6967	Unassigned	Unassigned	Unassigned	Unassigned	Unassigned	Unassigned	Unassigned	329	5	1.61902e-06	0	0	0	0	0	0	0	0	0	0	0	0	0	0	0	0	0	0	0	0	0	0	0	0	0	0	0	0	0	0	0	0	0	0	0	0	0	0	0
OTU_6997	Unassigned	Unassigned	Unassigned	Unassigned	Unassigned	Unassigned	Unassigned	343	5	1.61902e-06	0	0	0	0	0	0	0	0	0	0	0	0	0	0	0	0	2	3	0	0	0	0	0	0	0	0	0	0	0	0	0	0	0	0	0	0	0	0	0
OTU_7029	Unassigned	Unassigned	Unassigned	Unassigned	Unassigned	Unassigned	Unassigned	377	5	1.61902e-06	0	0	0	0	0	0	0	0	5	0	0	0	0	0	0	0	0	0	0	0	0	0	0	0	0	0	0	0	0	0	0	0	0	0	0	0	0	0	0
OTU_7034	Unassigned	Unassigned	Unassigned	Unassigned	Unassigned	Unassigned	Unassigned	440	5	1.61902e-06	0	0	0	0	0	0	0	0	0	0	0	0	0	0	0	0	0	0	0	0	0	0	0	0	0	0	0	0	0	0	0	0	0	0	0	0	0	0	0
OTU_7040	Unassigned	Unassigned	Unassigned	Unassigned	Unassigned	Unassigned	Unassigned	340	5	1.61902e-06	0	0	0	0	0	0	0	0	5	0	0	0	0	0	0	0	0	0	0	0	0	0	0	0	0	0	0	0	0	0	0	0	0	0	0	0	0	0	0
OTU_7080	Unassigned	Unassigned	Unassigned	Unassigned	Unassigned	Unassigned	Unassigned	286	5	1.61902e-06	0	0	0	0	0	0	0	0	0	0	0	0	0	0	0	0	3	0	0	0	0	0	0	0	0	0	0	0	0	0	0	0	0	0	0	0	0	0	0
OTU_7089	Unassigned	Unassigned	Unassigned	Unassigned	Unassigned	Unassigned	Unassigned	330	5	1.61902e-06	0	0	0	0	0	0	0	0	0	0	0	0	0	0	0	0	0	3	0	0	0	0	0	2	0	0	0	0	0	0	0	0	0	0	0	0	0	0	0
OTU_7121	Unassigned	Unassigned	Unassigned	Unassigned	Unassigned	Unassigned	Unassigned	337	5	1.61902e-06	0	0	0	0	0	0	0	0	0	0	0	0	0	0	0	0	0	0	0	0	0	0	0	0	0	0	0	0	0	0	0	5	0	0	0	0	0	0	0
OTU_7185	Unassigned	Unassigned	Unassigned	Unassigned	Unassigned	Unassigned	Unassigned	360	5	1.61902e-06	0	0	0	0	0	0	0	0	0	0	0	0	0	0	0	0	0	0	0	0	0	0	0	0	0	0	0	0	0	0	0	0	0	0	0	0	0	0	0
OTU_7187	Unassigned	Unassigned	Unassigned	Unassigned	Unassigned	Unassigned	Unassigned	354	5	1.61902e-06	0	0	0	0	0	0	0	0	0	0	0	0	0	0	0	0	0	0	0	0	0	0	0	0	0	0	0	0	0	0	0	0	0	0	0	0	0	0	0
OTU_7231	Unassigned	Unassigned	Unassigned	Unassigned	Unassigned	Unassigned	Unassigned	336	5	1.61902e-06	0	0	0	0	0	0	0	0	0	0	0	0	0	0	0	0	0	0	0	0	0	0	0	0	0	0	0	0	0	0	0	0	0	0	0	5	0	0	0
OTU_7387	Unassigned	Unassigned	Unassigned	Unassigned	Unassigned	Unassigned	Unassigned	421	5	1.61902e-06	0	0	0	0	0	0	0	0	0	0	0	0	0	0	0	0	0	0	0	0	0	0	0	0	0	0	0	0	0	0	0	0	0	0	0	0	0	0	0
OTU_7512	Unassigned	Unassigned	Unassigned	Unassigned	Unassigned	Unassigned	Unassigned	345	5	1.61902e-06	0	0	0	0	0	0	0	0	0	0	0	0	0	0	0	0	0	0	0	0	2	0	0	0	0	0	0	0	0	0	0	0	0	0	0	0	0	0	0
OTU_7557	Unassigned	Unassigned	Unassigned	Unassigned	Unassigned	Unassigned	Unassigned	339	5	1.61902e-06	0	0	0	0	0	0	0	0	0	0	0	0	0	0	0	0	0	0	0	0	0	0	0	0	0	0	0	0	0	0	0	0	0	0	0	0	5	0	0
OTU_7595	Unassigned	Unassigned	Unassigned	Unassigned	Unassigned	Unassigned	Unassigned	357	5	1.61902e-06	0	0	0	0	0	0	0	0	0	0	0	0	0	0	0	0	0	0	0	0	0	0	0	0	0	0	0	0	0	0	0	0	0	0	0	0	0	0	0
OTU_7635	Unassigned	Unassigned	Unassigned	Unassigned	Unassigned	Unassigned	Unassigned	359	5	1.61902e-06	0	0	0	0	0	0	0	0	0	0	0	0	0	0	0	0	0	0	0	0	0	0	0	0	0	0	0	0	0	0	0	0	0	0	0	0	0	4	0
OTU_7659	Unassigned	Unassigned	Unassigned	Unassigned	Unassigned	Unassigned	Unassigned	345	5	1.61902e-06	0	0	0	0	0	0	0	0	0	0	0	0	0	0	0	0	0	0	0	0	0	0	0	0	0	0	0	0	0	0	0	0	0	0	0	0	0	0	0
OTU_7716	Unassigned	Unassigned	Unassigned	Unassigned	Unassigned	Unassigned	Unassigned	349	5	1.61902e-06	0	0	0	0	0	0	0	0	0	0	0	0	0	0	0	0	0	0	0	0	0	0	0	3	0	0	0	0	0	0	0	0	0	0	0	0	0	0	0
OTU_7736	Unassigned	Unassigned	Unassigned	Unassigned	Unassigned	Unassigned	Unassigned	381	5	1.61902e-06	0	0	0	0	0	0	0	0	0	0	0	0	0	0	0	0	0	0	0	0	0	0	0	0	0	0	0	0	0	0	0	0	0	0	0	0	0	0	0
OTU_7840	Unassigned	Unassigned	Unassigned	Unassigned	Unassigned	Unassigned	Unassigned	356	5	1.61902e-06	0	0	0	0	0	0	0	0	0	0	0	0	0	0	0	0	0	0	0	0	0	0	0	0	0	0	0	0	0	0	0	0	0	0	0	0	0	0	0
OTU_7881	Unassigned	Unassigned	Unassigned	Unassigned	Unassigned	Unassigned	Unassigned	422	5	1.61902e-06	0	0	0	0	0	0	0	0	0	0	0	0	0	0	0	0	0	0	0	0	0	0	0	0	0	0	0	0	0	0	0	0	0	0	0	0	0	0	0
OTU_7893	Unassigned	Unassigned	Unassigned	Unassigned	Unassigned	Unassigned	Unassigned	430	5	1.61902e-06	0	0	0	0	0	0	0	0	0	0	0	0	0	0	0	0	0	0	0	0	0	0	0	0	0	0	0	0	0	5	0	0	0	0	0	0	0	0	0
OTU_7916	Unassigned	Unassigned	Unassigned	Unassigned	Unassigned	Unassigned	Unassigned	315	5	1.61902e-06	0	0	0	0	0	0	0	0	0	0	0	0	0	0	0	0	0	0	0	0	0	0	0	0	0	0	0	0	0	0	0	0	0	0	0	0	0	0	0
OTU_7941	Unassigned	Unassigned	Unassigned	Unassigned	Unassigned	Unassigned	Unassigned	313	5	1.61902e-06	0	0	0	0	0	0	0	0	0	0	5	0	0	0	0	0	0	0	0	0	0	0	0	0	0	0	0	0	0	0	0	0	0	0	0	0	0	0	0
OTU_7967	Unassigned	Unassigned	Unassigned	Unassigned	Unassigned	Unassigned	Unassigned	294	5	1.61902e-06	0	0	0	0	0	0	0	0	0	0	0	0	0	0	0	0	0	0	0	0	0	0	0	0	0	0	0	0	0	0	0	0	0	0	0	0	0	0	0
OTU_8027	Unassigned	Unassigned	Unassigned	Unassigned	Unassigned	Unassigned	Unassigned	436	5	1.61902e-06	0	0	0	0	0	0	0	0	5	0	0	0	0	0	0	0	0	0	0	0	0	0	0	0	0	0	0	0	0	0	0	0	0	0	0	0	0	0	0
OTU_8105	Unassigned	Unassigned	Unassigned	Unassigned	Unassigned	Unassigned	Unassigned	418	5	1.61902e-06	0	0	0	0	0	0	0	0	0	0	0	0	0	0	0	0	0	0	0	0	0	0	0	0	0	0	0	0	0	0	0	0	0	0	0	0	0	0	0
OTU_8114	Unassigned	Unassigned	Unassigned	Unassigned	Unassigned	Unassigned	Unassigned	341	5	1.61902e-06	0	0	0	0	0	0	0	0	5	0	0	0	0	0	0	0	0	0	0	0	0	0	0	0	0	0	0	0	0	0	0	0	0	0	0	0	0	0	0
OTU_8121	Unassigned	Unassigned	Unassigned	Unassigned	Unassigned	Unassigned	Unassigned	412	5	1.61902e-06	0	0	0	0	0	0	0	0	0	0	0	0	5	0	0	0	0	0	0	0	0	0	0	0	0	0	0	0	0	0	0	0	0	0	0	0	0	0	0
OTU_8125	Unassigned	Unassigned	Unassigned	Unassigned	Unassigned	Unassigned	Unassigned	379	5	1.61902e-06	0	0	0	0	0	0	0	0	0	0	0	0	0	0	0	0	0	0	0	0	0	0	0	0	0	0	0	0	0	0	0	0	0	0	0	0	0	0	5
OTU_8196	Unassigned	Unassigned	Unassigned	Unassigned	Unassigned	Unassigned	Unassigned	362	5	1.61902e-06	0	0	0	0	0	0	0	0	0	0	0	0	0	0	0	0	0	0	0	0	0	0	0	0	0	0	0	0	0	0	0	0	0	0	0	5	0	0	0
OTU_8227	Unassigned	Unassigned	Unassigned	Unassigned	Unassigned	Unassigned	Unassigned	455	5	1.61902e-06	0	0	0	0	5	0	0	0	0	0	0	0	0	0	0	0	0	0	0	0	0	0	0	0	0	0	0	0	0	0	0	0	0	0	0	0	0	0	0
OTU_8379	Unassigned	Unassigned	Unassigned	Unassigned	Unassigned	Unassigned	Unassigned	347	5	1.61902e-06	0	0	0	0	0	0	0	0	0	0	0	0	0	0	0	0	0	0	0	0	0	0	0	0	0	0	0	0	0	0	0	0	0	0	5	0	0	0	0
OTU_8388	Unassigned	Unassigned	Unassigned	Unassigned	Unassigned	Unassigned	Unassigned	335	5	1.61902e-06	0	0	0	0	0	0	0	0	0	0	0	0	0	0	0	0	0	0	0	0	0	0	0	0	0	0	0	0	0	0	0	0	0	0	0	0	0	0	0
OTU_8394	Unassigned	Unassigned	Unassigned	Unassigned	Unassigned	Unassigned	Unassigned	346	5	1.61902e-06	0	0	0	0	0	0	0	0	0	0	0	0	0	0	0	0	0	0	0	0	0	0	0	0	0	0	0	0	0	0	0	0	0	0	5	0	0	0	0
OTU_8420	Unassigned	Unassigned	Unassigned	Unassigned	Unassigned	Unassigned	Unassigned	348	5	1.61902e-06	0	0	0	0	5	0	0	0	0	0	0	0	0	0	0	0	0	0	0	0	0	0	0	0	0	0	0	0	0	0	0	0	0	0	0	0	0	0	0
OTU_8444	Unassigned	Unassigned	Unassigned	Unassigned	Unassigned	Unassigned	Unassigned	353	5	1.61902e-06	0	0	0	0	4	0	0	0	0	0	0	0	0	0	0	0	0	0	0	0	0	0	0	0	0	0	0	0	0	0	0	0	0	0	0	0	0	0	0
OTU_8461	Unassigned	Unassigned	Unassigned	Unassigned	Unassigned	Unassigned	Unassigned	417	5	1.61902e-06	0	0	0	0	0	0	0	0	0	0	0	0	0	0	0	0	3	0	0	0	0	0	0	0	0	0	0	0	0	0	0	0	0	0	0	0	0	0	0
OTU_8462	Unassigned	Unassigned	Unassigned	Unassigned	Unassigned	Unassigned	Unassigned	393	5	1.61902e-06	0	0	0	0	0	0	0	0	5	0	0	0	0	0	0	0	0	0	0	0	0	0	0	0	0	0	0	0	0	0	0	0	0	0	0	0	0	0	0
OTU_8584	Unassigned	Unassigned	Unassigned	Unassigned	Unassigned	Unassigned	Unassigned	346	5	1.61902e-06	0	0	0	0	0	0	0	0	5	0	0	0	0	0	0	0	0	0	0	0	0	0	0	0	0	0	0	0	0	0	0	0	0	0	0	0	0	0	0
OTU_8604	Unassigned	Unassigned	Unassigned	Unassigned	Unassigned	Unassigned	Unassigned	349	5	1.61902e-06	0	0	0	0	0	0	0	0	0	0	0	0	0	0	0	0	0	0	0	0	0	0	0	0	0	1	4	0	0	0	0	0	0	0	0	0	0	0	0
OTU_8653	Unassigned	Unassigned	Unassigned	Unassigned	Unassigned	Unassigned	Unassigned	360	5	1.61902e-06	0	0	0	0	0	0	0	0	0	0	0	0	0	0	0	0	0	0	0	0	0	0	0	5	0	0	0	0	0	0	0	0	0	0	0	0	0	0	0
OTU_8674	Unassigned	Unassigned	Unassigned	Unassigned	Unassigned	Unassigned	Unassigned	414	5	1.61902e-06	0	0	0	0	0	0	0	0	0	0	0	0	0	0	0	0	0	0	0	0	0	0	0	0	0	0	0	0	0	0	0	0	0	0	0	0	0	0	0
OTU_8718	Unassigned	Unassigned	Unassigned	Unassigned	Unassigned	Unassigned	Unassigned	285	5	1.61902e-06	0	0	0	0	0	0	0	0	0	0	0	0	0	0	0	0	0	0	0	0	0	0	0	0	0	0	0	0	0	0	0	0	0	0	0	0	0	0	0
OTU_8792	Unassigned	Unassigned	Unassigned	Unassigned	Unassigned	Unassigned	Unassigned	342	5	1.61902e-06	0	0	0	0	0	0	0	0	0	0	0	0	0	0	0	0	0	0	0	0	0	0	0	0	0	0	0	0	0	0	0	0	0	0	0	0	0	0	0
OTU_8886	Unassigned	Unassigned	Unassigned	Unassigned	Unassigned	Unassigned	Unassigned	432	5	1.61902e-06	0	0	5	0	0	0	0	0	0	0	0	0	0	0	0	0	0	0	0	0	0	0	0	0	0	0	0	0	0	0	0	0	0	0	0	0	0	0	0
OTU_8888	Unassigned	Unassigned	Unassigned	Unassigned	Unassigned	Unassigned	Unassigned	422	5	1.61902e-06	5	0	0	0	0	0	0	0	0	0	0	0	0	0	0	0	0	0	0	0	0	0	0	0	0	0	0	0	0	0	0	0	0	0	0	0	0	0	0
OTU_4038	Unassigned	Unassigned	Unassigned	Unassigned	Unassigned	Unassigned	Unassigned	354	4	1.29522e-06	0	0	0	0	0	0	0	4	0	0	0	0	0	0	0	0	0	0	0	0	0	0	0	0	0	0	0	0	0	0	0	0	0	0	0	0	0	0	0
OTU_4094	Unassigned	Unassigned	Unassigned	Unassigned	Unassigned	Unassigned	Unassigned	320	4	1.29522e-06	0	0	0	0	0	0	0	0	0	0	0	0	0	0	0	0	0	0	0	0	0	0	0	0	0	0	0	0	0	0	0	0	0	0	0	0	0	0	0
OTU_4163	Unassigned	Unassigned	Unassigned	Unassigned	Unassigned	Unassigned	Unassigned	349	4	1.29522e-06	0	0	0	0	0	0	0	0	0	0	0	0	0	0	0	0	0	0	0	0	0	0	0	0	0	0	0	0	0	0	0	4	0	0	0	0	0	0	0
OTU_4194	Unassigned	Unassigned	Unassigned	Unassigned	Unassigned	Unassigned	Unassigned	351	4	1.29522e-06	0	0	0	0	0	0	0	0	0	0	0	0	0	0	0	0	0	0	0	0	0	0	0	0	0	0	0	0	0	0	0	0	0	0	0	0	0	0	0
OTU_4202	Unassigned	Unassigned	Unassigned	Unassigned	Unassigned	Unassigned	Unassigned	362	4	1.29522e-06	0	0	0	0	0	0	0	0	0	0	0	0	0	0	0	0	0	0	0	0	0	0	0	0	0	0	0	0	0	0	0	0	0	0	0	0	0	0	0
OTU_4251	Unassigned	Unassigned	Unassigned	Unassigned	Unassigned	Unassigned	Unassigned	298	4	1.29522e-06	0	0	0	0	0	0	0	0	0	0	0	0	0	0	0	0	0	0	0	0	0	0	0	0	0	0	0	0	0	0	0	0	0	0	0	0	0	4	0
OTU_4268	Unassigned	Unassigned	Unassigned	Unassigned	Unassigned	Unassigned	Unassigned	380	4	1.29522e-06	0	0	0	0	0	0	0	0	0	0	0	0	0	0	0	0	0	0	0	0	0	0	0	0	0	0	0	0	0	0	0	0	0	0	0	0	0	0	0
OTU_4315	Unassigned	Unassigned	Unassigned	Unassigned	Unassigned	Unassigned	Unassigned	360	4	1.29522e-06	0	0	0	0	0	0	0	0	0	0	0	0	0	0	0	0	0	0	0	0	0	0	0	0	0	0	0	0	0	0	0	0	0	0	0	0	0	0	0
OTU_4332	Unassigned	Unassigned	Unassigned	Unassigned	Unassigned	Unassigned	Unassigned	366	4	1.29522e-06	0	0	0	0	0	0	0	0	0	0	0	0	0	0	0	0	0	0	0	0	0	0	0	0	0	0	0	0	0	0	0	0	0	0	0	0	0	0	0
OTU_4336	Unassigned	Unassigned	Unassigned	Unassigned	Unassigned	Unassigned	Unassigned	314	4	1.29522e-06	0	0	0	0	0	0	0	0	0	0	0	0	0	0	0	0	0	0	0	0	0	0	0	0	0	0	0	0	0	0	0	0	0	0	0	0	0	0	0
OTU_4354	Unassigned	Unassigned	Unassigned	Unassigned	Unassigned	Unassigned	Unassigned	264	4	1.29522e-06	0	0	0	0	0	0	0	0	0	4	0	0	0	0	0	0	0	0	0	0	0	0	0	0	0	0	0	0	0	0	0	0	0	0	0	0	0	0	0
OTU_4370	Unassigned	Unassigned	Unassigned	Unassigned	Unassigned	Unassigned	Unassigned	342	4	1.29522e-06	0	0	0	0	0	0	0	0	0	0	0	0	0	0	0	0	0	0	0	0	0	0	0	0	0	0	0	0	0	0	0	0	0	0	0	0	0	0	0
OTU_4390	Unassigned	Unassigned	Unassigned	Unassigned	Unassigned	Unassigned	Unassigned	350	4	1.29522e-06	0	0	0	0	0	0	0	0	0	0	0	0	0	0	0	0	0	4	0	0	0	0	0	0	0	0	0	0	0	0	0	0	0	0	0	0	0	0	0
OTU_4424	Unassigned	Unassigned	Unassigned	Unassigned	Unassigned	Unassigned	Unassigned	279	4	1.29522e-06	0	0	0	0	0	0	0	0	0	0	0	0	0	0	0	0	0	0	0	0	0	0	0	0	0	0	4	0	0	0	0	0	0	0	0	0	0	0	0
OTU_4442	Unassigned	Unassigned	Unassigned	Unassigned	Unassigned	Unassigned	Unassigned	378	4	1.29522e-06	0	0	0	0	0	0	0	0	0	0	0	0	0	0	0	0	0	0	0	0	0	0	0	0	0	0	0	0	0	0	0	0	0	0	0	0	0	0	0
OTU_4449	Unassigned	Unassigned	Unassigned	Unassigned	Unassigned	Unassigned	Unassigned	332	4	1.29522e-06	0	0	0	0	0	0	0	0	0	0	0	0	0	0	0	0	0	0	0	0	0	0	0	0	0	0	0	0	0	0	0	0	0	0	0	0	0	0	0
OTU_4473	Unassigned	Unassigned	Unassigned	Unassigned	Unassigned	Unassigned	Unassigned	322	4	1.29522e-06	0	0	0	0	0	0	0	0	0	0	0	0	4	0	0	0	0	0	0	0	0	0	0	0	0	0	0	0	0	0	0	0	0	0	0	0	0	0	0
OTU_4526	Unassigned	Unassigned	Unassigned	Unassigned	Unassigned	Unassigned	Unassigned	298	4	1.29522e-06	0	0	0	0	0	0	0	0	0	0	0	0	0	0	0	0	0	0	0	0	0	0	0	0	0	0	0	0	0	0	0	0	0	0	0	0	0	0	0
OTU_4539	Unassigned	Unassigned	Unassigned	Unassigned	Unassigned	Unassigned	Unassigned	338	4	1.29522e-06	0	0	0	0	0	0	0	0	0	0	0	0	0	4	0	0	0	0	0	0	0	0	0	0	0	0	0	0	0	0	0	0	0	0	0	0	0	0	0
OTU_4540	Unassigned	Unassigned	Unassigned	Unassigned	Unassigned	Unassigned	Unassigned	336	4	1.29522e-06	0	0	0	0	0	0	0	0	0	0	0	0	0	0	0	0	0	0	0	0	0	0	0	0	0	0	0	0	0	0	0	0	0	0	0	0	0	0	0
OTU_4550	Unassigned	Unassigned	Unassigned	Unassigned	Unassigned	Unassigned	Unassigned	258	4	1.29522e-06	0	0	0	0	0	0	0	0	0	0	0	0	0	0	0	0	0	0	0	0	0	0	0	0	0	0	0	0	0	0	0	0	0	0	0	0	0	0	0
OTU_4560	Unassigned	Unassigned	Unassigned	Unassigned	Unassigned	Unassigned	Unassigned	358	4	1.29522e-06	0	0	0	0	0	0	0	0	0	0	0	0	0	0	0	0	0	0	0	0	0	0	0	0	0	0	0	0	0	0	0	0	0	0	0	0	0	0	0
OTU_4585	Unassigned	Unassigned	Unassigned	Unassigned	Unassigned	Unassigned	Unassigned	341	4	1.29522e-06	0	0	0	0	0	0	0	0	0	0	0	0	0	0	0	0	0	0	0	0	0	0	0	0	0	0	0	0	0	0	0	0	0	0	0	0	4	0	0
OTU_4626	Unassigned	Unassigned	Unassigned	Unassigned	Unassigned	Unassigned	Unassigned	358	4	1.29522e-06	0	0	0	0	0	0	0	4	0	0	0	0	0	0	0	0	0	0	0	0	0	0	0	0	0	0	0	0	0	0	0	0	0	0	0	0	0	0	0
OTU_4655	Unassigned	Unassigned	Unassigned	Unassigned	Unassigned	Unassigned	Unassigned	321	4	1.29522e-06	0	0	0	0	0	0	0	0	0	0	0	0	0	0	0	0	0	0	0	0	0	0	0	0	0	0	0	0	0	0	0	0	0	0	0	0	0	0	0
OTU_4660	Unassigned	Unassigned	Unassigned	Unassigned	Unassigned	Unassigned	Unassigned	333	4	1.29522e-06	0	0	4	0	0	0	0	0	0	0	0	0	0	0	0	0	0	0	0	0	0	0	0	0	0	0	0	0	0	0	0	0	0	0	0	0	0	0	0
OTU_4682	Unassigned	Unassigned	Unassigned	Unassigned	Unassigned	Unassigned	Unassigned	276	4	1.29522e-06	0	0	0	0	0	0	0	0	0	0	0	0	4	0	0	0	0	0	0	0	0	0	0	0	0	0	0	0	0	0	0	0	0	0	0	0	0	0	0
OTU_4683	Unassigned	Unassigned	Unassigned	Unassigned	Unassigned	Unassigned	Unassigned	339	4	1.29522e-06	0	0	0	4	0	0	0	0	0	0	0	0	0	0	0	0	0	0	0	0	0	0	0	0	0	0	0	0	0	0	0	0	0	0	0	0	0	0	0
OTU_4692	Unassigned	Unassigned	Unassigned	Unassigned	Unassigned	Unassigned	Unassigned	336	4	1.29522e-06	0	0	4	0	0	0	0	0	0	0	0	0	0	0	0	0	0	0	0	0	0	0	0	0	0	0	0	0	0	0	0	0	0	0	0	0	0	0	0
OTU_4740	Unassigned	Unassigned	Unassigned	Unassigned	Unassigned	Unassigned	Unassigned	335	4	1.29522e-06	0	0	0	0	0	0	0	0	0	0	0	0	0	0	0	0	0	0	0	0	0	0	0	4	0	0	0	0	0	0	0	0	0	0	0	0	0	0	0
OTU_4744	Unassigned	Unassigned	Unassigned	Unassigned	Unassigned	Unassigned	Unassigned	359	4	1.29522e-06	0	0	0	0	0	0	0	0	0	0	0	0	0	0	0	0	0	0	0	0	0	0	0	0	0	0	0	0	0	0	0	0	0	0	0	0	0	0	0
OTU_4769	Unassigned	Unassigned	Unassigned	Unassigned	Unassigned	Unassigned	Unassigned	336	4	1.29522e-06	0	0	0	0	0	0	0	0	0	0	0	0	0	0	0	0	0	0	0	0	0	0	0	0	0	0	0	0	0	0	0	0	0	0	0	0	0	0	0
OTU_4777	Unassigned	Unassigned	Unassigned	Unassigned	Unassigned	Unassigned	Unassigned	377	4	1.29522e-06	0	0	0	0	0	0	0	0	0	0	0	0	0	0	0	0	0	0	0	0	0	0	0	0	0	0	0	0	0	0	0	0	0	0	0	0	0	0	0
OTU_4785	Unassigned	Unassigned	Unassigned	Unassigned	Unassigned	Unassigned	Unassigned	395	4	1.29522e-06	0	0	0	0	0	0	0	0	0	0	0	0	0	0	0	0	0	0	0	0	0	0	0	0	0	0	0	0	0	0	0	0	0	0	4	0	0	0	0
OTU_4842	Unassigned	Unassigned	Unassigned	Unassigned	Unassigned	Unassigned	Unassigned	345	4	1.29522e-06	0	0	0	0	0	0	0	0	0	0	0	0	0	0	0	0	0	0	0	0	0	0	0	0	0	0	0	0	0	0	0	0	0	0	0	0	0	0	0
OTU_4850	Unassigned	Unassigned	Unassigned	Unassigned	Unassigned	Unassigned	Unassigned	419	4	1.29522e-06	0	0	0	0	0	0	0	0	0	0	0	0	0	0	0	0	0	0	0	0	0	0	0	0	0	0	0	0	0	0	0	0	0	0	0	0	0	0	0
OTU_4900	Unassigned	Unassigned	Unassigned	Unassigned	Unassigned	Unassigned	Unassigned	328	4	1.29522e-06	0	0	0	0	0	0	0	0	0	0	0	0	0	0	0	0	0	0	0	0	0	0	0	0	0	0	0	0	0	0	0	0	0	0	0	0	0	0	0
OTU_4938	Unassigned	Unassigned	Unassigned	Unassigned	Unassigned	Unassigned	Unassigned	317	4	1.29522e-06	0	0	0	0	0	0	0	0	0	0	0	0	0	0	0	0	0	0	0	0	0	0	0	0	0	0	0	0	0	0	0	0	0	0	0	0	0	0	0
OTU_5001	Unassigned	Unassigned	Unassigned	Unassigned	Unassigned	Unassigned	Unassigned	349	4	1.29522e-06	0	0	0	0	0	0	0	0	0	0	0	0	0	0	0	0	0	4	0	0	0	0	0	0	0	0	0	0	0	0	0	0	0	0	0	0	0	0	0
OTU_5035	Unassigned	Unassigned	Unassigned	Unassigned	Unassigned	Unassigned	Unassigned	310	4	1.29522e-06	0	0	0	0	0	0	0	0	0	0	0	0	0	0	0	0	0	0	0	0	0	0	0	0	0	0	0	0	0	0	0	0	0	0	0	0	0	0	0
OTU_5073	Unassigned	Unassigned	Unassigned	Unassigned	Unassigned	Unassigned	Unassigned	326	4	1.29522e-06	0	0	0	0	0	0	0	0	0	0	0	0	0	0	0	0	0	0	0	0	4	0	0	0	0	0	0	0	0	0	0	0	0	0	0	0	0	0	0
OTU_5096	Unassigned	Unassigned	Unassigned	Unassigned	Unassigned	Unassigned	Unassigned	273	4	1.29522e-06	0	0	0	0	0	0	0	0	0	0	0	0	0	0	0	0	0	0	0	0	0	0	0	0	0	0	0	0	0	0	0	0	0	0	0	0	0	0	0
OTU_5137	Unassigned	Unassigned	Unassigned	Unassigned	Unassigned	Unassigned	Unassigned	347	4	1.29522e-06	0	0	0	0	0	0	0	0	0	0	0	0	0	3	0	0	0	0	0	0	0	0	0	0	0	0	0	0	0	0	0	0	0	0	0	0	1	0	0
OTU_5155	Unassigned	Unassigned	Unassigned	Unassigned	Unassigned	Unassigned	Unassigned	345	4	1.29522e-06	0	0	0	0	0	0	0	0	0	0	0	0	0	0	0	0	0	0	0	0	0	0	0	0	0	0	0	0	0	0	0	0	0	0	0	0	0	0	0
OTU_5158	Unassigned	Unassigned	Unassigned	Unassigned	Unassigned	Unassigned	Unassigned	330	4	1.29522e-06	0	0	0	0	0	0	0	0	0	0	0	0	0	0	0	0	0	0	0	0	0	0	0	0	0	0	0	0	0	0	0	0	0	0	0	0	0	0	0
OTU_5166	Unassigned	Unassigned	Unassigned	Unassigned	Unassigned	Unassigned	Unassigned	355	4	1.29522e-06	0	0	0	0	0	0	0	0	0	0	0	0	0	0	0	0	0	0	0	0	0	0	0	0	0	0	0	0	0	0	0	0	0	0	0	0	0	0	0
OTU_5170	Unassigned	Unassigned	Unassigned	Unassigned	Unassigned	Unassigned	Unassigned	334	4	1.29522e-06	0	0	0	0	0	0	0	0	0	0	0	0	0	0	0	0	0	0	0	0	0	0	0	0	0	0	0	0	0	0	0	0	0	0	0	0	0	0	0
OTU_5179	Unassigned	Unassigned	Unassigned	Unassigned	Unassigned	Unassigned	Unassigned	344	4	1.29522e-06	0	0	0	0	0	0	0	0	0	0	0	0	0	0	0	0	0	0	0	0	0	0	0	0	0	0	0	0	0	0	0	0	0	0	0	0	0	0	0
OTU_5192	Unassigned	Unassigned	Unassigned	Unassigned	Unassigned	Unassigned	Unassigned	303	4	1.29522e-06	0	0	0	0	0	0	0	0	0	0	0	0	0	0	0	0	0	0	0	0	0	0	0	0	0	0	0	0	0	0	0	0	0	0	0	0	0	0	0
OTU_5202	Unassigned	Unassigned	Unassigned	Unassigned	Unassigned	Unassigned	Unassigned	349	4	1.29522e-06	0	0	0	0	0	0	0	0	0	0	0	0	0	0	0	0	0	0	0	0	0	0	0	0	0	0	0	0	0	0	0	0	0	0	4	0	0	0	0
OTU_5211	Unassigned	Unassigned	Unassigned	Unassigned	Unassigned	Unassigned	Unassigned	337	4	1.29522e-06	0	0	0	0	0	0	0	0	0	0	0	0	0	0	0	0	0	0	0	0	0	0	0	0	0	0	0	0	0	0	0	0	0	0	0	0	0	0	0
OTU_5214	Unassigned	Unassigned	Unassigned	Unassigned	Unassigned	Unassigned	Unassigned	333	4	1.29522e-06	0	0	0	0	0	0	0	0	0	0	0	0	0	0	0	0	0	4	0	0	0	0	0	0	0	0	0	0	0	0	0	0	0	0	0	0	0	0	0
OTU_5241	Unassigned	Unassigned	Unassigned	Unassigned	Unassigned	Unassigned	Unassigned	339	4	1.29522e-06	0	0	0	0	4	0	0	0	0	0	0	0	0	0	0	0	0	0	0	0	0	0	0	0	0	0	0	0	0	0	0	0	0	0	0	0	0	0	0
OTU_5267	Unassigned	Unassigned	Unassigned	Unassigned	Unassigned	Unassigned	Unassigned	342	4	1.29522e-06	0	0	0	0	0	0	0	0	0	0	0	0	0	0	0	0	0	0	0	0	0	0	0	0	0	0	0	0	0	0	0	4	0	0	0	0	0	0	0
OTU_5277	Unassigned	Unassigned	Unassigned	Unassigned	Unassigned	Unassigned	Unassigned	332	4	1.29522e-06	0	0	0	0	0	0	0	0	0	0	0	0	0	0	0	0	0	0	0	0	0	0	0	0	0	0	0	0	0	0	0	0	0	0	0	0	0	0	0
OTU_5291	Unassigned	Unassigned	Unassigned	Unassigned	Unassigned	Unassigned	Unassigned	332	4	1.29522e-06	0	0	0	0	0	0	0	0	0	0	0	0	0	0	0	0	0	0	0	0	0	0	0	0	0	0	0	0	0	0	0	0	0	0	0	0	0	0	0
OTU_5329	Unassigned	Unassigned	Unassigned	Unassigned	Unassigned	Unassigned	Unassigned	353	4	1.29522e-06	0	0	0	0	0	0	0	0	0	0	0	0	0	0	0	0	0	0	0	0	0	0	0	0	0	0	0	0	0	0	0	0	0	0	0	0	0	0	0
OTU_5331	Unassigned	Unassigned	Unassigned	Unassigned	Unassigned	Unassigned	Unassigned	347	4	1.29522e-06	0	0	0	0	0	0	0	0	0	0	0	0	0	0	0	0	0	2	0	0	0	0	0	0	0	0	0	0	0	0	0	0	0	0	0	0	0	0	0
OTU_5335	Unassigned	Unassigned	Unassigned	Unassigned	Unassigned	Unassigned	Unassigned	331	4	1.29522e-06	0	0	0	0	0	0	0	0	0	0	0	0	0	0	0	0	0	0	0	0	0	0	4	0	0	0	0	0	0	0	0	0	0	0	0	0	0	0	0
OTU_5336	Unassigned	Unassigned	Unassigned	Unassigned	Unassigned	Unassigned	Unassigned	407	4	1.29522e-06	0	0	0	0	0	0	0	0	0	0	0	0	0	0	0	0	0	0	0	0	0	0	0	0	0	0	0	0	0	0	0	0	0	0	0	0	0	0	0
OTU_5339	Unassigned	Unassigned	Unassigned	Unassigned	Unassigned	Unassigned	Unassigned	322	4	1.29522e-06	0	0	0	0	0	0	0	0	0	0	0	0	0	0	0	0	0	0	0	0	4	0	0	0	0	0	0	0	0	0	0	0	0	0	0	0	0	0	0
OTU_5360	Unassigned	Unassigned	Unassigned	Unassigned	Unassigned	Unassigned	Unassigned	363	4	1.29522e-06	0	0	0	0	0	0	0	0	0	0	0	0	0	0	0	0	0	0	0	0	0	0	0	0	0	0	0	0	0	0	0	0	0	0	0	0	0	0	0
OTU_5369	Unassigned	Unassigned	Unassigned	Unassigned	Unassigned	Unassigned	Unassigned	345	4	1.29522e-06	0	0	0	0	0	0	0	0	0	0	0	0	0	0	0	0	0	0	0	0	0	0	0	0	0	0	0	0	0	0	0	0	0	0	0	0	0	0	0
OTU_5371	Unassigned	Unassigned	Unassigned	Unassigned	Unassigned	Unassigned	Unassigned	322	4	1.29522e-06	0	0	0	0	0	0	0	0	0	0	0	0	0	0	0	0	0	0	0	0	0	0	0	0	0	0	0	0	0	0	0	0	0	0	0	0	0	0	0
OTU_5439	Unassigned	Unassigned	Unassigned	Unassigned	Unassigned	Unassigned	Unassigned	338	4	1.29522e-06	0	0	0	0	0	0	0	0	0	0	0	0	0	0	0	0	0	0	0	0	0	0	0	0	0	0	0	0	0	0	0	0	0	0	4	0	0	0	0
OTU_5460	Unassigned	Unassigned	Unassigned	Unassigned	Unassigned	Unassigned	Unassigned	381	4	1.29522e-06	0	0	0	0	0	0	0	0	0	0	0	0	0	0	4	0	0	0	0	0	0	0	0	0	0	0	0	0	0	0	0	0	0	0	0	0	0	0	0
OTU_5532	Unassigned	Unassigned	Unassigned	Unassigned	Unassigned	Unassigned	Unassigned	315	4	1.29522e-06	0	0	0	0	0	0	0	0	0	0	0	0	4	0	0	0	0	0	0	0	0	0	0	0	0	0	0	0	0	0	0	0	0	0	0	0	0	0	0
OTU_5553	Unassigned	Unassigned	Unassigned	Unassigned	Unassigned	Unassigned	Unassigned	382	4	1.29522e-06	0	0	0	0	0	0	0	0	0	0	0	0	0	0	0	0	0	0	0	0	0	0	0	0	0	0	0	0	0	0	0	0	0	0	4	0	0	0	0
OTU_5578	Unassigned	Unassigned	Unassigned	Unassigned	Unassigned	Unassigned	Unassigned	352	4	1.29522e-06	0	0	0	0	0	0	0	0	0	0	0	0	0	0	0	0	0	0	0	0	0	0	0	0	0	0	0	0	0	0	0	0	0	0	0	0	0	0	0
OTU_5579	Unassigned	Unassigned	Unassigned	Unassigned	Unassigned	Unassigned	Unassigned	309	4	1.29522e-06	0	0	0	0	0	0	0	0	0	0	0	0	0	0	0	0	0	0	0	0	0	0	0	0	0	0	0	0	0	0	0	0	0	0	0	4	0	0	0
OTU_5588	Unassigned	Unassigned	Unassigned	Unassigned	Unassigned	Unassigned	Unassigned	301	4	1.29522e-06	0	0	0	0	0	0	0	0	0	0	0	0	0	0	0	0	0	0	0	0	0	0	2	0	0	0	0	0	0	0	0	0	0	0	0	0	0	0	0
OTU_5594	Unassigned	Unassigned	Unassigned	Unassigned	Unassigned	Unassigned	Unassigned	382	4	1.29522e-06	0	0	0	0	0	0	0	0	0	4	0	0	0	0	0	0	0	0	0	0	0	0	0	0	0	0	0	0	0	0	0	0	0	0	0	0	0	0	0
OTU_5615	Unassigned	Unassigned	Unassigned	Unassigned	Unassigned	Unassigned	Unassigned	347	4	1.29522e-06	0	0	0	0	0	0	0	0	0	0	0	0	0	0	0	0	0	4	0	0	0	0	0	0	0	0	0	0	0	0	0	0	0	0	0	0	0	0	0
OTU_5621	Unassigned	Unassigned	Unassigned	Unassigned	Unassigned	Unassigned	Unassigned	342	4	1.29522e-06	0	0	0	0	0	0	0	0	0	0	0	0	0	0	0	0	0	0	0	0	0	0	0	0	0	0	4	0	0	0	0	0	0	0	0	0	0	0	0
OTU_5630	Unassigned	Unassigned	Unassigned	Unassigned	Unassigned	Unassigned	Unassigned	347	4	1.29522e-06	0	0	0	0	0	0	0	0	0	0	0	0	0	0	0	0	0	0	0	0	0	0	0	0	0	0	0	0	0	0	0	0	0	0	0	0	0	0	0
OTU_5633	Unassigned	Unassigned	Unassigned	Unassigned	Unassigned	Unassigned	Unassigned	293	4	1.29522e-06	0	0	0	0	0	0	0	4	0	0	0	0	0	0	0	0	0	0	0	0	0	0	0	0	0	0	0	0	0	0	0	0	0	0	0	0	0	0	0
OTU_5640	Unassigned	Unassigned	Unassigned	Unassigned	Unassigned	Unassigned	Unassigned	266	4	1.29522e-06	0	0	0	0	0	0	0	0	0	0	0	0	0	0	4	0	0	0	0	0	0	0	0	0	0	0	0	0	0	0	0	0	0	0	0	0	0	0	0
OTU_5664	Unassigned	Unassigned	Unassigned	Unassigned	Unassigned	Unassigned	Unassigned	318	4	1.29522e-06	0	0	0	0	0	0	0	0	0	0	0	0	0	0	0	0	0	0	0	0	0	0	0	0	0	0	0	0	0	0	0	0	0	0	0	0	3	0	0
OTU_5682	Unassigned	Unassigned	Unassigned	Unassigned	Unassigned	Unassigned	Unassigned	344	4	1.29522e-06	0	0	0	0	0	0	0	0	0	0	0	0	0	0	0	0	0	4	0	0	0	0	0	0	0	0	0	0	0	0	0	0	0	0	0	0	0	0	0
OTU_5694	Unassigned	Unassigned	Unassigned	Unassigned	Unassigned	Unassigned	Unassigned	352	4	1.29522e-06	0	0	0	0	0	0	0	0	0	0	0	0	0	0	0	0	0	4	0	0	0	0	0	0	0	0	0	0	0	0	0	0	0	0	0	0	0	0	0
OTU_5721	Unassigned	Unassigned	Unassigned	Unassigned	Unassigned	Unassigned	Unassigned	334	4	1.29522e-06	0	0	0	0	0	0	0	0	0	0	0	0	0	0	0	0	0	0	0	0	0	0	0	0	0	0	0	0	0	0	0	0	0	0	0	4	0	0	0
OTU_5854	Unassigned	Unassigned	Unassigned	Unassigned	Unassigned	Unassigned	Unassigned	251	4	1.29522e-06	0	0	0	0	0	0	0	0	0	0	0	0	0	0	4	0	0	0	0	0	0	0	0	0	0	0	0	0	0	0	0	0	0	0	0	0	0	0	0
OTU_5857	Unassigned	Unassigned	Unassigned	Unassigned	Unassigned	Unassigned	Unassigned	344	4	1.29522e-06	0	0	0	0	0	0	0	0	4	0	0	0	0	0	0	0	0	0	0	0	0	0	0	0	0	0	0	0	0	0	0	0	0	0	0	0	0	0	0
OTU_5859	Unassigned	Unassigned	Unassigned	Unassigned	Unassigned	Unassigned	Unassigned	358	4	1.29522e-06	0	0	0	0	0	0	0	0	0	0	0	0	0	0	0	0	0	0	0	0	0	0	0	0	0	0	0	0	0	0	0	0	0	0	0	4	0	0	0
OTU_5879	Unassigned	Unassigned	Unassigned	Unassigned	Unassigned	Unassigned	Unassigned	340	4	1.29522e-06	0	0	0	0	0	0	0	0	0	0	0	0	0	0	0	0	0	0	0	0	0	0	0	0	0	0	0	0	0	0	0	0	0	0	0	0	0	0	0
OTU_5900	Unassigned	Unassigned	Unassigned	Unassigned	Unassigned	Unassigned	Unassigned	354	4	1.29522e-06	0	0	0	0	0	0	0	0	0	0	0	0	0	0	0	0	0	0	0	0	0	0	0	4	0	0	0	0	0	0	0	0	0	0	0	0	0	0	0
OTU_5917	Unassigned	Unassigned	Unassigned	Unassigned	Unassigned	Unassigned	Unassigned	347	4	1.29522e-06	0	0	0	0	0	0	0	0	0	0	0	0	0	0	0	0	0	0	0	0	0	0	0	0	0	0	0	0	0	0	0	0	0	0	0	0	0	0	0
OTU_5942	Unassigned	Unassigned	Unassigned	Unassigned	Unassigned	Unassigned	Unassigned	277	4	1.29522e-06	0	0	0	0	0	0	0	0	0	0	0	0	0	0	0	0	0	0	0	0	0	0	0	0	0	0	4	0	0	0	0	0	0	0	0	0	0	0	0
OTU_5994	Unassigned	Unassigned	Unassigned	Unassigned	Unassigned	Unassigned	Unassigned	356	4	1.29522e-06	0	0	0	0	0	0	0	0	0	0	0	0	0	0	0	0	0	0	0	0	0	0	0	0	0	0	0	0	0	0	0	0	0	0	0	0	0	0	0
OTU_6002	Unassigned	Unassigned	Unassigned	Unassigned	Unassigned	Unassigned	Unassigned	294	4	1.29522e-06	0	0	0	0	0	0	0	0	0	0	0	0	0	0	0	0	0	0	0	0	0	0	0	0	0	0	0	0	0	0	4	0	0	0	0	0	0	0	0
OTU_6017	Unassigned	Unassigned	Unassigned	Unassigned	Unassigned	Unassigned	Unassigned	356	4	1.29522e-06	0	0	0	0	0	0	0	0	0	0	0	0	0	0	0	0	0	0	0	0	0	0	0	0	0	0	0	0	0	0	0	0	0	0	0	0	0	0	0
OTU_6062	Unassigned	Unassigned	Unassigned	Unassigned	Unassigned	Unassigned	Unassigned	354	4	1.29522e-06	0	0	0	4	0	0	0	0	0	0	0	0	0	0	0	0	0	0	0	0	0	0	0	0	0	0	0	0	0	0	0	0	0	0	0	0	0	0	0
OTU_6071	Unassigned	Unassigned	Unassigned	Unassigned	Unassigned	Unassigned	Unassigned	342	4	1.29522e-06	0	0	0	0	0	0	0	0	0	0	0	0	0	0	0	0	4	0	0	0	0	0	0	0	0	0	0	0	0	0	0	0	0	0	0	0	0	0	0
OTU_6078	Unassigned	Unassigned	Unassigned	Unassigned	Unassigned	Unassigned	Unassigned	463	4	1.29522e-06	0	0	0	0	0	0	0	0	0	0	0	0	0	0	0	0	0	0	0	0	0	0	0	0	0	0	0	0	0	0	0	0	0	0	0	0	0	0	0
OTU_6109	Unassigned	Unassigned	Unassigned	Unassigned	Unassigned	Unassigned	Unassigned	370	4	1.29522e-06	0	0	0	0	0	0	0	0	0	0	0	0	0	0	0	0	0	0	0	0	0	0	0	0	0	0	0	0	0	0	0	0	0	0	0	4	0	0	0
OTU_6169	Unassigned	Unassigned	Unassigned	Unassigned	Unassigned	Unassigned	Unassigned	333	4	1.29522e-06	0	0	0	0	0	0	0	0	0	0	0	0	0	0	0	0	0	0	0	0	0	0	0	0	0	0	0	0	0	0	0	0	0	0	0	0	4	0	0
OTU_6204	Unassigned	Unassigned	Unassigned	Unassigned	Unassigned	Unassigned	Unassigned	353	4	1.29522e-06	0	0	0	0	0	0	0	0	0	0	0	0	0	0	0	0	0	0	0	0	0	0	0	0	0	0	0	0	0	0	0	0	0	0	0	0	0	0	0
OTU_6208	Unassigned	Unassigned	Unassigned	Unassigned	Unassigned	Unassigned	Unassigned	342	4	1.29522e-06	0	0	0	0	0	0	0	0	0	0	0	0	0	0	0	0	0	0	0	0	0	0	0	0	0	0	0	0	0	0	0	0	0	0	0	0	0	0	0
OTU_6209	Unassigned	Unassigned	Unassigned	Unassigned	Unassigned	Unassigned	Unassigned	342	4	1.29522e-06	0	0	0	0	0	0	0	0	0	0	0	0	0	0	0	0	0	0	0	0	0	0	0	0	4	0	0	0	0	0	0	0	0	0	0	0	0	0	0
OTU_6211	Unassigned	Unassigned	Unassigned	Unassigned	Unassigned	Unassigned	Unassigned	326	4	1.29522e-06	0	0	0	0	0	0	0	0	0	0	0	0	0	0	0	0	0	0	0	0	0	0	0	0	0	0	0	0	0	0	0	0	0	0	0	0	0	0	0
OTU_6235	Unassigned	Unassigned	Unassigned	Unassigned	Unassigned	Unassigned	Unassigned	336	4	1.29522e-06	0	0	0	0	0	0	0	0	0	0	0	0	0	0	0	0	0	0	0	0	0	0	0	0	0	0	0	0	0	0	0	0	0	0	0	0	0	0	0
OTU_6332	Unassigned	Unassigned	Unassigned	Unassigned	Unassigned	Unassigned	Unassigned	334	4	1.29522e-06	0	0	0	0	0	0	0	0	0	0	0	0	0	0	0	0	0	0	0	0	0	0	0	0	0	0	0	0	0	0	0	0	0	0	0	0	0	0	0
OTU_6352	Unassigned	Unassigned	Unassigned	Unassigned	Unassigned	Unassigned	Unassigned	336	4	1.29522e-06	0	0	0	0	0	0	0	0	0	0	0	0	0	0	0	0	0	0	0	0	0	0	0	4	0	0	0	0	0	0	0	0	0	0	0	0	0	0	0
OTU_6401	Unassigned	Unassigned	Unassigned	Unassigned	Unassigned	Unassigned	Unassigned	336	4	1.29522e-06	0	0	0	0	0	0	0	0	0	0	0	0	0	0	0	0	0	0	0	0	0	0	0	0	0	0	0	0	0	0	0	0	0	0	0	0	0	0	0
OTU_6405	Unassigned	Unassigned	Unassigned	Unassigned	Unassigned	Unassigned	Unassigned	355	4	1.29522e-06	0	0	0	0	0	0	0	0	0	0	0	0	0	0	0	0	0	0	0	0	0	0	0	0	0	0	0	0	0	0	0	0	0	0	0	0	0	0	0
OTU_6452	Unassigned	Unassigned	Unassigned	Unassigned	Unassigned	Unassigned	Unassigned	431	4	1.29522e-06	0	0	0	0	0	0	0	0	0	0	0	0	0	0	0	0	0	0	0	0	0	0	0	0	0	0	0	0	0	0	0	0	0	0	0	0	0	0	0
OTU_6453	Unassigned	Unassigned	Unassigned	Unassigned	Unassigned	Unassigned	Unassigned	359	4	1.29522e-06	0	0	0	0	0	0	0	0	0	0	0	0	0	0	0	0	0	0	0	0	0	0	0	0	0	0	0	0	0	0	0	0	0	0	0	0	0	0	0
OTU_6482	Unassigned	Unassigned	Unassigned	Unassigned	Unassigned	Unassigned	Unassigned	446	4	1.29522e-06	0	0	0	0	0	0	0	0	0	0	0	0	0	0	0	0	0	0	0	0	0	0	0	0	0	0	0	0	0	0	0	0	0	0	0	0	0	0	0
OTU_6487	Unassigned	Unassigned	Unassigned	Unassigned	Unassigned	Unassigned	Unassigned	342	4	1.29522e-06	0	0	0	0	0	0	0	0	0	0	0	0	0	0	0	0	0	0	0	0	0	0	0	0	0	0	0	0	0	0	0	0	0	0	0	0	0	0	0
OTU_6515	Unassigned	Unassigned	Unassigned	Unassigned	Unassigned	Unassigned	Unassigned	324	4	1.29522e-06	0	0	0	0	0	0	0	0	0	0	0	0	0	0	0	0	0	0	0	0	0	0	1	0	0	0	0	0	0	0	0	3	0	0	0	0	0	0	0
OTU_6556	Unassigned	Unassigned	Unassigned	Unassigned	Unassigned	Unassigned	Unassigned	340	4	1.29522e-06	0	0	0	0	0	0	0	0	0	0	0	0	0	0	0	0	0	0	0	0	0	0	0	0	0	0	0	0	0	0	0	0	0	0	0	0	4	0	0
OTU_6561	Unassigned	Unassigned	Unassigned	Unassigned	Unassigned	Unassigned	Unassigned	396	4	1.29522e-06	0	0	0	0	0	0	0	0	0	0	0	0	0	0	0	0	0	0	0	0	0	0	0	0	0	0	0	0	0	0	0	0	0	0	0	0	0	0	0
OTU_6565	Unassigned	Unassigned	Unassigned	Unassigned	Unassigned	Unassigned	Unassigned	401	4	1.29522e-06	0	0	0	0	0	0	4	0	0	0	0	0	0	0	0	0	0	0	0	0	0	0	0	0	0	0	0	0	0	0	0	0	0	0	0	0	0	0	0
OTU_6575	Unassigned	Unassigned	Unassigned	Unassigned	Unassigned	Unassigned	Unassigned	331	4	1.29522e-06	0	0	0	0	0	0	0	0	0	0	0	0	0	0	0	0	0	0	0	0	0	0	0	0	0	0	0	0	0	0	0	0	0	0	0	0	0	0	0
OTU_6598	Unassigned	Unassigned	Unassigned	Unassigned	Unassigned	Unassigned	Unassigned	320	4	1.29522e-06	0	0	0	0	0	0	0	0	0	0	0	0	0	0	0	0	0	0	0	0	0	0	0	0	0	0	0	0	0	0	0	0	0	0	0	0	0	0	0
OTU_6608	Unassigned	Unassigned	Unassigned	Unassigned	Unassigned	Unassigned	Unassigned	372	4	1.29522e-06	0	0	0	0	0	0	0	0	0	0	0	0	0	0	0	0	0	0	0	0	0	0	0	0	0	0	0	0	0	0	0	0	0	0	0	0	0	0	0
OTU_6630	Unassigned	Unassigned	Unassigned	Unassigned	Unassigned	Unassigned	Unassigned	346	4	1.29522e-06	0	0	0	0	0	0	0	0	0	0	0	0	0	0	0	0	0	0	0	0	0	0	0	0	0	0	0	0	0	0	0	0	0	0	0	0	0	0	0
OTU_6652	Unassigned	Unassigned	Unassigned	Unassigned	Unassigned	Unassigned	Unassigned	308	4	1.29522e-06	0	0	0	0	0	0	0	0	0	0	0	0	0	0	0	0	0	0	0	0	0	0	0	0	0	0	0	0	0	0	0	0	0	0	4	0	0	0	0
OTU_6685	Unassigned	Unassigned	Unassigned	Unassigned	Unassigned	Unassigned	Unassigned	332	4	1.29522e-06	0	0	0	0	0	0	0	0	0	0	0	0	0	0	0	0	0	0	0	0	0	0	0	0	0	0	0	0	0	0	0	0	0	0	0	0	0	0	0
OTU_6795	Unassigned	Unassigned	Unassigned	Unassigned	Unassigned	Unassigned	Unassigned	252	4	1.29522e-06	4	0	0	0	0	0	0	0	0	0	0	0	0	0	0	0	0	0	0	0	0	0	0	0	0	0	0	0	0	0	0	0	0	0	0	0	0	0	0
OTU_6804	Unassigned	Unassigned	Unassigned	Unassigned	Unassigned	Unassigned	Unassigned	338	4	1.29522e-06	0	0	0	0	0	0	0	0	0	0	0	0	0	0	0	0	0	0	0	0	0	0	0	0	0	0	0	0	0	0	0	0	0	0	0	0	0	0	0
OTU_6807	Unassigned	Unassigned	Unassigned	Unassigned	Unassigned	Unassigned	Unassigned	344	4	1.29522e-06	0	0	0	0	0	0	0	0	0	0	0	0	0	0	0	0	0	0	0	0	0	0	0	0	0	0	0	0	0	0	0	0	0	0	0	0	0	0	0
OTU_6811	Unassigned	Unassigned	Unassigned	Unassigned	Unassigned	Unassigned	Unassigned	335	4	1.29522e-06	0	0	0	0	0	0	0	0	0	0	0	0	0	0	0	0	0	0	0	0	0	0	0	0	0	0	0	0	0	0	0	0	0	0	0	0	0	0	0
OTU_6843	Unassigned	Unassigned	Unassigned	Unassigned	Unassigned	Unassigned	Unassigned	353	4	1.29522e-06	0	0	0	0	4	0	0	0	0	0	0	0	0	0	0	0	0	0	0	0	0	0	0	0	0	0	0	0	0	0	0	0	0	0	0	0	0	0	0
OTU_6857	Unassigned	Unassigned	Unassigned	Unassigned	Unassigned	Unassigned	Unassigned	333	4	1.29522e-06	0	0	0	0	0	0	0	0	0	0	0	0	0	0	0	0	0	0	0	0	0	0	0	0	0	0	0	0	0	0	0	0	0	0	0	0	0	0	0
OTU_6986	Unassigned	Unassigned	Unassigned	Unassigned	Unassigned	Unassigned	Unassigned	350	4	1.29522e-06	0	0	0	0	0	0	0	0	0	0	0	0	0	0	0	0	2	0	0	2	0	0	0	0	0	0	0	0	0	0	0	0	0	0	0	0	0	0	0
OTU_6991	Unassigned	Unassigned	Unassigned	Unassigned	Unassigned	Unassigned	Unassigned	336	4	1.29522e-06	0	0	0	0	0	0	0	0	0	0	0	0	0	0	0	0	0	0	0	0	0	0	0	0	0	0	0	0	0	0	0	0	0	0	0	0	0	0	0
OTU_7032	Unassigned	Unassigned	Unassigned	Unassigned	Unassigned	Unassigned	Unassigned	360	4	1.29522e-06	0	0	0	0	0	0	0	0	0	0	0	0	0	0	0	0	0	0	0	0	0	0	0	0	0	0	0	0	0	0	0	0	0	0	0	0	0	0	0
OTU_7074	Unassigned	Unassigned	Unassigned	Unassigned	Unassigned	Unassigned	Unassigned	358	4	1.29522e-06	0	0	0	0	0	0	0	0	0	0	0	0	0	0	0	0	0	0	0	0	0	0	0	0	0	0	0	0	0	0	0	0	0	0	0	0	0	0	0
OTU_7127	Unassigned	Unassigned	Unassigned	Unassigned	Unassigned	Unassigned	Unassigned	392	4	1.29522e-06	0	0	0	0	0	0	0	0	0	0	0	0	0	0	0	0	0	0	0	0	0	0	0	0	0	0	0	0	0	0	0	0	0	0	0	0	0	0	0
OTU_7139	Unassigned	Unassigned	Unassigned	Unassigned	Unassigned	Unassigned	Unassigned	433	4	1.29522e-06	0	0	0	0	0	0	0	0	0	0	0	0	0	0	0	0	0	0	0	0	0	0	0	0	0	0	0	0	0	0	0	0	0	0	0	0	0	0	0
OTU_7200	Unassigned	Unassigned	Unassigned	Unassigned	Unassigned	Unassigned	Unassigned	345	4	1.29522e-06	0	0	0	0	0	0	0	0	0	0	0	0	0	0	0	0	0	0	0	0	4	0	0	0	0	0	0	0	0	0	0	0	0	0	0	0	0	0	0
OTU_7228	Unassigned	Unassigned	Unassigned	Unassigned	Unassigned	Unassigned	Unassigned	330	4	1.29522e-06	0	0	0	0	0	0	0	0	0	0	0	0	0	0	0	0	0	0	0	0	0	0	0	0	0	0	0	0	0	0	0	0	0	0	0	0	0	0	0
OTU_7256	Unassigned	Unassigned	Unassigned	Unassigned	Unassigned	Unassigned	Unassigned	328	4	1.29522e-06	0	0	0	0	0	0	0	0	0	0	0	0	0	0	0	0	0	0	0	0	0	0	0	0	0	0	0	0	0	0	0	0	0	0	0	0	2	0	0
OTU_7266	Unassigned	Unassigned	Unassigned	Unassigned	Unassigned	Unassigned	Unassigned	384	4	1.29522e-06	0	0	0	0	0	0	0	0	0	0	0	0	0	0	0	0	0	0	0	0	0	0	0	0	0	0	0	0	0	0	0	0	0	0	0	0	0	0	0
OTU_7310	Unassigned	Unassigned	Unassigned	Unassigned	Unassigned	Unassigned	Unassigned	343	4	1.29522e-06	0	0	0	0	0	0	0	0	0	0	0	0	0	0	0	0	0	0	0	0	0	0	0	0	0	0	0	0	0	0	0	0	0	0	0	0	0	0	0
OTU_7314	Unassigned	Unassigned	Unassigned	Unassigned	Unassigned	Unassigned	Unassigned	275	4	1.29522e-06	0	0	0	0	0	0	0	0	0	0	0	0	0	0	0	0	0	0	0	0	0	0	0	0	0	0	0	0	0	0	0	0	0	0	0	0	0	0	0
OTU_7320	Unassigned	Unassigned	Unassigned	Unassigned	Unassigned	Unassigned	Unassigned	330	4	1.29522e-06	0	0	0	0	0	0	0	0	0	0	0	0	0	0	0	0	0	0	0	0	0	0	0	0	0	0	0	0	0	0	0	0	0	0	0	0	0	0	0
OTU_7340	Unassigned	Unassigned	Unassigned	Unassigned	Unassigned	Unassigned	Unassigned	344	4	1.29522e-06	0	0	0	0	0	0	0	0	0	0	0	0	0	0	0	0	0	0	0	0	0	0	0	0	0	0	0	0	0	0	0	0	0	0	0	0	2	0	0
OTU_7410	Unassigned	Unassigned	Unassigned	Unassigned	Unassigned	Unassigned	Unassigned	315	4	1.29522e-06	0	0	0	2	0	0	0	0	0	0	0	0	0	0	0	0	0	0	0	0	0	0	0	0	0	0	0	0	0	0	0	0	0	0	0	0	0	0	0
OTU_7465	Unassigned	Unassigned	Unassigned	Unassigned	Unassigned	Unassigned	Unassigned	355	4	1.29522e-06	0	0	0	0	0	0	0	0	4	0	0	0	0	0	0	0	0	0	0	0	0	0	0	0	0	0	0	0	0	0	0	0	0	0	0	0	0	0	0
OTU_7467	Unassigned	Unassigned	Unassigned	Unassigned	Unassigned	Unassigned	Unassigned	422	4	1.29522e-06	0	0	0	0	0	0	0	0	0	0	0	0	0	0	0	0	0	4	0	0	0	0	0	0	0	0	0	0	0	0	0	0	0	0	0	0	0	0	0
OTU_7474	Unassigned	Unassigned	Unassigned	Unassigned	Unassigned	Unassigned	Unassigned	333	4	1.29522e-06	0	0	0	0	0	0	0	0	0	0	0	0	0	0	0	0	0	0	0	0	0	0	0	0	0	0	0	0	0	0	0	0	0	0	0	0	0	0	0
OTU_7478	Unassigned	Unassigned	Unassigned	Unassigned	Unassigned	Unassigned	Unassigned	357	4	1.29522e-06	0	0	0	0	0	0	0	0	0	0	0	0	0	0	0	0	0	0	0	0	0	0	0	0	0	0	0	0	0	0	0	0	0	0	0	4	0	0	0
OTU_7517	Unassigned	Unassigned	Unassigned	Unassigned	Unassigned	Unassigned	Unassigned	486	4	1.29522e-06	0	0	0	0	0	0	0	0	0	0	0	0	0	0	0	0	0	0	0	0	0	0	0	0	0	0	0	0	0	0	0	0	0	0	0	0	0	0	0
OTU_7532	Unassigned	Unassigned	Unassigned	Unassigned	Unassigned	Unassigned	Unassigned	354	4	1.29522e-06	0	0	0	0	0	0	0	0	0	0	0	0	0	0	0	0	0	0	0	0	0	0	0	0	0	0	0	0	0	0	0	0	0	0	0	0	0	0	0
OTU_7549	Unassigned	Unassigned	Unassigned	Unassigned	Unassigned	Unassigned	Unassigned	359	4	1.29522e-06	0	0	0	0	0	0	0	0	0	0	0	0	0	0	0	0	0	0	0	0	0	0	0	0	0	0	0	0	0	0	0	0	0	0	0	0	0	0	0
OTU_7567	Unassigned	Unassigned	Unassigned	Unassigned	Unassigned	Unassigned	Unassigned	354	4	1.29522e-06	0	0	0	0	0	0	0	0	0	0	0	0	0	0	0	0	0	0	0	0	0	0	0	0	0	0	0	0	0	0	0	0	0	0	0	0	0	0	0
OTU_7610	Unassigned	Unassigned	Unassigned	Unassigned	Unassigned	Unassigned	Unassigned	485	4	1.29522e-06	0	0	0	0	0	0	0	0	0	0	0	0	0	0	0	0	0	0	0	0	0	0	0	0	0	0	0	0	1	0	0	0	0	0	0	0	0	0	0
OTU_7613	Unassigned	Unassigned	Unassigned	Unassigned	Unassigned	Unassigned	Unassigned	368	4	1.29522e-06	0	0	0	0	0	0	0	0	0	0	0	0	0	0	0	0	0	0	0	0	0	0	0	0	0	0	0	0	0	0	0	0	0	0	0	0	0	0	0
OTU_7655	Unassigned	Unassigned	Unassigned	Unassigned	Unassigned	Unassigned	Unassigned	299	4	1.29522e-06	0	0	0	0	0	0	0	0	0	0	0	1	0	0	0	0	0	0	0	0	0	0	0	0	0	0	0	0	0	0	0	0	0	0	0	0	0	0	0
OTU_7675	Unassigned	Unassigned	Unassigned	Unassigned	Unassigned	Unassigned	Unassigned	335	4	1.29522e-06	0	0	0	0	0	0	0	0	0	0	0	0	0	0	0	0	0	0	0	0	0	0	0	0	0	0	0	0	0	0	0	0	0	0	0	0	0	0	0
OTU_7684	Unassigned	Unassigned	Unassigned	Unassigned	Unassigned	Unassigned	Unassigned	347	4	1.29522e-06	0	0	0	0	0	0	0	0	0	0	0	0	0	0	0	0	0	0	0	0	0	0	0	0	0	0	0	0	0	0	0	0	0	0	0	0	0	4	0
OTU_7690	Unassigned	Unassigned	Unassigned	Unassigned	Unassigned	Unassigned	Unassigned	280	4	1.29522e-06	0	0	0	0	0	0	0	0	0	0	0	0	0	0	0	0	0	0	0	0	0	0	0	0	0	0	4	0	0	0	0	0	0	0	0	0	0	0	0
OTU_7720	Unassigned	Unassigned	Unassigned	Unassigned	Unassigned	Unassigned	Unassigned	273	4	1.29522e-06	0	0	0	0	0	0	0	0	0	0	0	0	0	0	0	0	0	0	0	0	0	0	0	0	0	0	0	0	0	0	0	0	0	0	0	0	0	0	0
OTU_7740	Unassigned	Unassigned	Unassigned	Unassigned	Unassigned	Unassigned	Unassigned	349	4	1.29522e-06	0	0	0	0	0	0	0	0	0	0	0	0	0	0	0	0	0	0	0	0	0	0	0	0	0	0	0	0	0	0	0	0	0	0	0	0	0	0	0
OTU_7741	Unassigned	Unassigned	Unassigned	Unassigned	Unassigned	Unassigned	Unassigned	338	4	1.29522e-06	0	0	0	0	0	0	0	0	0	0	0	0	0	0	0	0	0	0	0	0	0	0	0	0	0	0	0	0	0	0	0	0	0	0	0	0	0	0	0
OTU_7746	Unassigned	Unassigned	Unassigned	Unassigned	Unassigned	Unassigned	Unassigned	420	4	1.29522e-06	0	0	0	0	0	0	0	0	0	0	0	0	0	0	0	0	0	0	0	0	0	0	0	0	0	0	0	0	0	0	0	0	0	0	0	0	0	0	0
OTU_7753	Unassigned	Unassigned	Unassigned	Unassigned	Unassigned	Unassigned	Unassigned	275	4	1.29522e-06	0	0	0	0	0	0	0	0	0	0	0	0	0	0	0	0	0	0	0	0	0	0	0	0	0	0	0	0	0	0	0	0	0	0	0	0	0	0	0
OTU_7776	Unassigned	Unassigned	Unassigned	Unassigned	Unassigned	Unassigned	Unassigned	345	4	1.29522e-06	0	0	0	0	0	0	0	0	0	0	0	0	0	0	0	0	0	0	0	0	0	0	0	0	0	0	0	0	0	0	0	0	0	0	0	0	0	0	0
OTU_7858	Unassigned	Unassigned	Unassigned	Unassigned	Unassigned	Unassigned	Unassigned	254	4	1.29522e-06	0	0	0	0	0	0	0	0	0	0	0	0	0	0	0	0	0	0	0	0	0	0	0	0	0	0	0	0	0	0	0	0	0	0	0	0	0	0	0
OTU_7866	Unassigned	Unassigned	Unassigned	Unassigned	Unassigned	Unassigned	Unassigned	341	4	1.29522e-06	0	0	0	0	0	0	0	0	0	0	0	0	0	0	0	0	0	0	0	0	0	0	0	0	0	0	0	0	0	0	0	0	0	0	0	0	0	0	0
OTU_7882	Unassigned	Unassigned	Unassigned	Unassigned	Unassigned	Unassigned	Unassigned	401	4	1.29522e-06	0	0	0	0	0	0	0	0	0	0	0	0	0	0	0	0	0	0	0	0	0	0	0	0	0	0	0	0	0	0	4	0	0	0	0	0	0	0	0
OTU_7906	Unassigned	Unassigned	Unassigned	Unassigned	Unassigned	Unassigned	Unassigned	328	4	1.29522e-06	0	0	0	0	0	0	0	0	0	0	0	0	0	0	0	0	0	0	0	0	0	0	0	0	0	0	0	0	0	0	0	0	0	0	0	0	0	0	0
OTU_7912	Unassigned	Unassigned	Unassigned	Unassigned	Unassigned	Unassigned	Unassigned	318	4	1.29522e-06	0	0	0	0	0	0	0	0	0	0	0	0	0	0	0	0	0	0	0	0	0	0	0	0	0	0	0	0	0	0	0	0	0	0	0	0	0	0	0
OTU_7940	Unassigned	Unassigned	Unassigned	Unassigned	Unassigned	Unassigned	Unassigned	350	4	1.29522e-06	0	0	0	0	0	0	0	0	0	0	0	0	0	0	0	0	0	0	0	0	0	0	0	0	0	0	0	0	0	0	0	0	0	4	0	0	0	0	0
OTU_7974	Unassigned	Unassigned	Unassigned	Unassigned	Unassigned	Unassigned	Unassigned	463	4	1.29522e-06	0	0	0	0	0	0	0	0	0	0	0	0	0	0	0	0	0	0	0	0	0	0	0	0	4	0	0	0	0	0	0	0	0	0	0	0	0	0	0
OTU_7980	Unassigned	Unassigned	Unassigned	Unassigned	Unassigned	Unassigned	Unassigned	341	4	1.29522e-06	0	0	0	0	0	0	0	0	0	0	0	0	0	0	0	0	0	0	0	0	0	0	0	0	0	0	0	0	0	0	0	0	0	0	0	0	0	0	0
OTU_7983	Unassigned	Unassigned	Unassigned	Unassigned	Unassigned	Unassigned	Unassigned	319	4	1.29522e-06	0	0	0	0	0	0	0	0	0	0	0	0	0	0	0	0	0	0	0	0	0	0	0	0	0	0	0	0	0	0	0	0	0	0	0	0	0	0	0
OTU_8007	Unassigned	Unassigned	Unassigned	Unassigned	Unassigned	Unassigned	Unassigned	336	4	1.29522e-06	0	0	0	0	0	0	0	0	0	0	0	0	0	0	0	0	0	0	0	0	0	0	0	0	0	0	0	0	0	0	0	0	0	0	4	0	0	0	0
OTU_8025	Unassigned	Unassigned	Unassigned	Unassigned	Unassigned	Unassigned	Unassigned	341	4	1.29522e-06	0	0	0	0	0	0	0	0	4	0	0	0	0	0	0	0	0	0	0	0	0	0	0	0	0	0	0	0	0	0	0	0	0	0	0	0	0	0	0
OTU_8050	Unassigned	Unassigned	Unassigned	Unassigned	Unassigned	Unassigned	Unassigned	335	4	1.29522e-06	0	0	0	0	0	0	0	0	4	0	0	0	0	0	0	0	0	0	0	0	0	0	0	0	0	0	0	0	0	0	0	0	0	0	0	0	0	0	0
OTU_8071	Unassigned	Unassigned	Unassigned	Unassigned	Unassigned	Unassigned	Unassigned	361	4	1.29522e-06	0	0	0	0	0	0	0	0	4	0	0	0	0	0	0	0	0	0	0	0	0	0	0	0	0	0	0	0	0	0	0	0	0	0	0	0	0	0	0
OTU_8081	Unassigned	Unassigned	Unassigned	Unassigned	Unassigned	Unassigned	Unassigned	433	4	1.29522e-06	0	0	4	0	0	0	0	0	0	0	0	0	0	0	0	0	0	0	0	0	0	0	0	0	0	0	0	0	0	0	0	0	0	0	0	0	0	0	0
OTU_8087	Unassigned	Unassigned	Unassigned	Unassigned	Unassigned	Unassigned	Unassigned	434	4	1.29522e-06	0	0	0	0	0	0	0	0	0	0	0	0	0	0	0	0	0	0	0	0	0	0	0	0	0	0	0	0	0	0	0	0	0	0	0	0	4	0	0
OTU_8091	Unassigned	Unassigned	Unassigned	Unassigned	Unassigned	Unassigned	Unassigned	392	4	1.29522e-06	0	0	0	0	0	0	0	0	0	0	0	0	0	0	0	0	0	0	0	0	4	0	0	0	0	0	0	0	0	0	0	0	0	0	0	0	0	0	0
OTU_8103	Unassigned	Unassigned	Unassigned	Unassigned	Unassigned	Unassigned	Unassigned	404	4	1.29522e-06	0	0	0	0	0	0	0	0	0	0	0	0	0	0	0	0	0	0	0	0	0	0	0	0	0	0	0	0	0	0	0	0	0	0	0	0	0	0	0
OTU_8161	Unassigned	Unassigned	Unassigned	Unassigned	Unassigned	Unassigned	Unassigned	339	4	1.29522e-06	0	0	0	0	4	0	0	0	0	0	0	0	0	0	0	0	0	0	0	0	0	0	0	0	0	0	0	0	0	0	0	0	0	0	0	0	0	0	0
OTU_8203	Unassigned	Unassigned	Unassigned	Unassigned	Unassigned	Unassigned	Unassigned	441	4	1.29522e-06	0	0	0	0	0	0	0	0	0	0	0	0	0	0	0	0	0	0	0	0	0	0	0	0	0	0	0	0	0	0	0	0	0	0	0	0	0	0	0
OTU_8217	Unassigned	Unassigned	Unassigned	Unassigned	Unassigned	Unassigned	Unassigned	397	4	1.29522e-06	0	0	0	0	0	0	0	4	0	0	0	0	0	0	0	0	0	0	0	0	0	0	0	0	0	0	0	0	0	0	0	0	0	0	0	0	0	0	0
OTU_8297	Unassigned	Unassigned	Unassigned	Unassigned	Unassigned	Unassigned	Unassigned	343	4	1.29522e-06	0	0	0	0	2	0	0	0	0	0	0	0	0	0	0	0	2	0	0	0	0	0	0	0	0	0	0	0	0	0	0	0	0	0	0	0	0	0	0
OTU_8384	Unassigned	Unassigned	Unassigned	Unassigned	Unassigned	Unassigned	Unassigned	337	4	1.29522e-06	0	0	0	0	0	0	0	0	4	0	0	0	0	0	0	0	0	0	0	0	0	0	0	0	0	0	0	0	0	0	0	0	0	0	0	0	0	0	0
OTU_8430	Unassigned	Unassigned	Unassigned	Unassigned	Unassigned	Unassigned	Unassigned	436	4	1.29522e-06	4	0	0	0	0	0	0	0	0	0	0	0	0	0	0	0	0	0	0	0	0	0	0	0	0	0	0	0	0	0	0	0	0	0	0	0	0	0	0
OTU_8465	Unassigned	Unassigned	Unassigned	Unassigned	Unassigned	Unassigned	Unassigned	344	4	1.29522e-06	0	0	0	0	0	0	0	0	0	0	0	0	0	0	0	0	0	0	0	4	0	0	0	0	0	0	0	0	0	0	0	0	0	0	0	0	0	0	0
OTU_8473	Unassigned	Unassigned	Unassigned	Unassigned	Unassigned	Unassigned	Unassigned	392	4	1.29522e-06	0	0	0	0	0	0	0	0	0	0	0	0	0	0	0	0	0	0	0	0	0	0	0	0	0	0	0	0	0	0	0	0	0	0	0	0	0	0	0
OTU_8478	Unassigned	Unassigned	Unassigned	Unassigned	Unassigned	Unassigned	Unassigned	327	4	1.29522e-06	0	0	0	0	2	0	0	0	0	0	0	0	0	0	0	0	0	0	0	0	0	0	0	0	0	0	0	0	2	0	0	0	0	0	0	0	0	0	0
OTU_8485	Unassigned	Unassigned	Unassigned	Unassigned	Unassigned	Unassigned	Unassigned	344	4	1.29522e-06	0	0	0	0	0	0	0	0	0	0	0	0	0	0	0	0	0	4	0	0	0	0	0	0	0	0	0	0	0	0	0	0	0	0	0	0	0	0	0
OTU_8495	Unassigned	Unassigned	Unassigned	Unassigned	Unassigned	Unassigned	Unassigned	363	4	1.29522e-06	0	0	0	0	0	0	0	0	4	0	0	0	0	0	0	0	0	0	0	0	0	0	0	0	0	0	0	0	0	0	0	0	0	0	0	0	0	0	0
OTU_8497	Unassigned	Unassigned	Unassigned	Unassigned	Unassigned	Unassigned	Unassigned	347	4	1.29522e-06	0	0	0	0	0	0	0	0	4	0	0	0	0	0	0	0	0	0	0	0	0	0	0	0	0	0	0	0	0	0	0	0	0	0	0	0	0	0	0
OTU_8515	Unassigned	Unassigned	Unassigned	Unassigned	Unassigned	Unassigned	Unassigned	464	4	1.29522e-06	0	0	0	0	0	0	0	0	0	0	0	0	0	0	0	0	0	0	0	0	0	0	0	0	0	0	0	0	0	0	0	0	0	0	0	0	0	0	0
OTU_8530	Unassigned	Unassigned	Unassigned	Unassigned	Unassigned	Unassigned	Unassigned	331	4	1.29522e-06	0	0	0	0	0	0	0	0	0	0	0	0	0	0	0	0	0	0	0	0	0	0	0	0	0	0	0	0	0	0	0	0	0	0	0	0	0	0	0
OTU_8548	Unassigned	Unassigned	Unassigned	Unassigned	Unassigned	Unassigned	Unassigned	334	4	1.29522e-06	0	0	0	0	0	0	0	0	0	0	0	0	0	0	0	0	0	0	0	0	0	0	0	0	0	0	0	0	0	0	0	0	0	0	0	0	0	0	0
OTU_8552	Unassigned	Unassigned	Unassigned	Unassigned	Unassigned	Unassigned	Unassigned	459	4	1.29522e-06	0	0	0	0	0	0	0	0	0	0	0	0	0	0	0	0	0	0	0	0	0	0	0	0	0	0	0	0	0	0	0	0	0	0	0	0	4	0	0
OTU_8559	Unassigned	Unassigned	Unassigned	Unassigned	Unassigned	Unassigned	Unassigned	452	4	1.29522e-06	0	0	0	0	0	0	0	0	0	0	0	0	0	0	0	0	0	0	0	0	0	0	0	0	0	0	0	0	0	0	0	0	0	0	0	0	0	0	0
OTU_8571	Unassigned	Unassigned	Unassigned	Unassigned	Unassigned	Unassigned	Unassigned	352	4	1.29522e-06	0	0	0	0	0	0	0	0	0	0	0	0	0	0	0	0	0	0	0	0	0	0	0	0	0	0	0	0	0	0	0	0	0	0	0	0	0	0	0
OTU_8581	Unassigned	Unassigned	Unassigned	Unassigned	Unassigned	Unassigned	Unassigned	264	4	1.29522e-06	0	0	0	0	0	0	0	0	0	0	0	0	0	0	0	0	0	0	0	0	0	0	0	0	0	0	0	0	0	0	0	0	0	0	0	0	0	0	0
OTU_8586	Unassigned	Unassigned	Unassigned	Unassigned	Unassigned	Unassigned	Unassigned	252	4	1.29522e-06	0	0	0	0	0	0	0	4	0	0	0	0	0	0	0	0	0	0	0	0	0	0	0	0	0	0	0	0	0	0	0	0	0	0	0	0	0	0	0
OTU_8588	Unassigned	Unassigned	Unassigned	Unassigned	Unassigned	Unassigned	Unassigned	350	4	1.29522e-06	0	0	0	0	0	0	0	0	0	0	0	0	0	0	0	0	0	0	0	0	0	0	0	0	0	0	0	0	0	0	0	0	0	0	0	0	0	0	0
OTU_8595	Unassigned	Unassigned	Unassigned	Unassigned	Unassigned	Unassigned	Unassigned	335	4	1.29522e-06	0	0	0	0	0	0	0	0	4	0	0	0	0	0	0	0	0	0	0	0	0	0	0	0	0	0	0	0	0	0	0	0	0	0	0	0	0	0	0
OTU_8643	Unassigned	Unassigned	Unassigned	Unassigned	Unassigned	Unassigned	Unassigned	355	4	1.29522e-06	0	0	0	0	0	0	0	0	0	0	0	0	0	2	0	0	0	0	0	0	0	0	0	0	0	0	0	0	0	0	0	0	0	0	0	0	0	0	0
OTU_8692	Unassigned	Unassigned	Unassigned	Unassigned	Unassigned	Unassigned	Unassigned	444	4	1.29522e-06	0	0	0	0	4	0	0	0	0	0	0	0	0	0	0	0	0	0	0	0	0	0	0	0	0	0	0	0	0	0	0	0	0	0	0	0	0	0	0
OTU_8705	Unassigned	Unassigned	Unassigned	Unassigned	Unassigned	Unassigned	Unassigned	364	4	1.29522e-06	0	0	0	0	0	0	0	0	0	0	0	0	0	0	0	0	0	0	0	0	0	0	0	0	0	0	0	0	0	0	0	0	0	0	0	0	0	0	0
OTU_8715	Unassigned	Unassigned	Unassigned	Unassigned	Unassigned	Unassigned	Unassigned	288	4	1.29522e-06	0	0	0	0	0	0	0	0	0	0	0	0	0	0	0	0	0	0	0	0	0	0	0	0	3	0	0	0	0	0	0	0	0	0	0	0	0	0	0
OTU_8731	Unassigned	Unassigned	Unassigned	Unassigned	Unassigned	Unassigned	Unassigned	354	4	1.29522e-06	0	0	0	0	0	0	0	0	0	0	0	0	0	0	0	0	0	0	0	0	0	0	0	0	0	0	0	0	0	4	0	0	0	0	0	0	0	0	0
OTU_8745	Unassigned	Unassigned	Unassigned	Unassigned	Unassigned	Unassigned	Unassigned	346	4	1.29522e-06	0	0	0	0	0	0	0	0	0	0	0	0	0	0	0	0	0	0	0	0	0	0	0	4	0	0	0	0	0	0	0	0	0	0	0	0	0	0	0
OTU_8748	Unassigned	Unassigned	Unassigned	Unassigned	Unassigned	Unassigned	Unassigned	328	4	1.29522e-06	0	0	0	0	3	0	0	0	0	0	0	0	0	0	0	0	0	0	0	0	0	0	0	0	0	0	0	0	0	0	0	0	0	0	0	0	0	0	0
OTU_8760	Unassigned	Unassigned	Unassigned	Unassigned	Unassigned	Unassigned	Unassigned	339	4	1.29522e-06	0	0	0	0	0	0	0	0	0	0	0	0	0	0	0	0	0	0	0	0	0	0	0	0	0	0	0	0	0	0	0	0	0	0	0	0	0	0	0
OTU_8777	Unassigned	Unassigned	Unassigned	Unassigned	Unassigned	Unassigned	Unassigned	326	4	1.29522e-06	0	0	0	0	0	0	0	0	0	0	0	0	4	0	0	0	0	0	0	0	0	0	0	0	0	0	0	0	0	0	0	0	0	0	0	0	0	0	0
OTU_8808	Unassigned	Unassigned	Unassigned	Unassigned	Unassigned	Unassigned	Unassigned	328	4	1.29522e-06	0	0	0	0	0	0	0	0	0	0	0	0	0	0	0	0	0	0	0	0	0	0	0	0	0	0	0	0	0	0	0	0	0	0	0	0	0	0	0
OTU_8842	Unassigned	Unassigned	Unassigned	Unassigned	Unassigned	Unassigned	Unassigned	340	4	1.29522e-06	0	0	0	0	0	0	0	0	0	0	0	0	0	0	0	0	0	0	0	0	0	0	0	0	0	1	0	0	0	0	0	0	0	0	0	0	0	0	0
OTU_8848	Unassigned	Unassigned	Unassigned	Unassigned	Unassigned	Unassigned	Unassigned	425	4	1.29522e-06	0	0	0	0	0	0	0	0	0	0	0	0	0	0	0	0	0	0	0	0	0	0	0	0	0	0	0	0	0	0	0	0	0	0	0	0	0	0	0
OTU_8883	Unassigned	Unassigned	Unassigned	Unassigned	Unassigned	Unassigned	Unassigned	351	4	1.29522e-06	0	0	0	0	0	0	0	0	0	0	0	0	0	0	0	0	0	0	0	0	0	0	0	0	0	0	0	0	0	0	0	0	0	0	0	0	0	0	0
OTU_8902	Unassigned	Unassigned	Unassigned	Unassigned	Unassigned	Unassigned	Unassigned	385	4	1.29522e-06	0	0	0	0	0	0	0	0	0	0	0	0	0	0	0	0	0	0	0	0	0	0	0	0	0	0	0	0	0	0	0	0	0	0	0	0	0	0	0
OTU_4963	Unassigned	Unassigned	Unassigned	Unassigned	Unassigned	Unassigned	Unassigned	351	3	9.71412e-07	0	0	0	0	0	0	0	0	0	0	0	0	0	0	0	0	0	0	0	0	0	0	0	0	0	0	0	0	0	0	0	3	0	0	0	0	0	0	0
OTU_4974	Unassigned	Unassigned	Unassigned	Unassigned	Unassigned	Unassigned	Unassigned	360	3	9.71412e-07	0	0	0	0	0	0	0	0	0	0	0	0	0	0	0	0	0	0	0	0	0	0	0	0	0	0	0	0	0	0	0	0	0	0	0	0	0	0	0
OTU_4978	Unassigned	Unassigned	Unassigned	Unassigned	Unassigned	Unassigned	Unassigned	324	3	9.71412e-07	0	0	0	0	0	0	0	0	0	0	0	0	0	0	0	0	0	0	0	0	0	0	0	0	0	0	0	0	0	0	0	0	0	0	0	0	0	3	0
OTU_4991	Unassigned	Unassigned	Unassigned	Unassigned	Unassigned	Unassigned	Unassigned	263	3	9.71412e-07	0	0	0	0	0	0	0	0	0	0	0	0	0	0	3	0	0	0	0	0	0	0	0	0	0	0	0	0	0	0	0	0	0	0	0	0	0	0	0
OTU_5002	Unassigned	Unassigned	Unassigned	Unassigned	Unassigned	Unassigned	Unassigned	356	3	9.71412e-07	0	0	0	0	0	0	0	0	0	0	0	0	0	0	0	0	0	0	0	0	0	0	0	0	0	0	0	0	0	0	0	0	0	0	0	0	0	0	0
OTU_5005	Unassigned	Unassigned	Unassigned	Unassigned	Unassigned	Unassigned	Unassigned	261	3	9.71412e-07	0	0	0	0	0	0	0	0	0	0	0	0	0	0	0	0	0	0	0	0	0	0	0	0	0	0	0	0	0	0	0	3	0	0	0	0	0	0	0
OTU_5011	Unassigned	Unassigned	Unassigned	Unassigned	Unassigned	Unassigned	Unassigned	389	3	9.71412e-07	0	0	0	0	0	0	0	0	0	0	0	0	0	0	0	0	0	0	0	0	0	0	0	0	0	0	0	0	0	0	0	0	0	0	0	0	0	0	0
OTU_5026	Unassigned	Unassigned	Unassigned	Unassigned	Unassigned	Unassigned	Unassigned	355	3	9.71412e-07	0	0	0	0	0	0	0	0	0	0	0	0	0	0	0	0	0	0	0	0	0	0	0	0	0	0	0	0	0	0	0	0	0	0	0	0	0	0	0
OTU_5031	Unassigned	Unassigned	Unassigned	Unassigned	Unassigned	Unassigned	Unassigned	323	3	9.71412e-07	0	0	0	0	0	0	0	0	0	0	0	0	0	0	0	0	0	0	0	0	0	0	0	0	0	0	0	0	0	0	0	0	0	0	0	0	0	0	0
OTU_5060	Unassigned	Unassigned	Unassigned	Unassigned	Unassigned	Unassigned	Unassigned	351	3	9.71412e-07	0	0	0	0	0	0	0	0	0	0	0	0	0	0	0	0	0	0	0	0	0	0	0	0	0	0	0	0	0	0	0	0	0	0	0	0	0	0	0
OTU_5062	Unassigned	Unassigned	Unassigned	Unassigned	Unassigned	Unassigned	Unassigned	343	3	9.71412e-07	0	0	0	0	0	0	0	0	3	0	0	0	0	0	0	0	0	0	0	0	0	0	0	0	0	0	0	0	0	0	0	0	0	0	0	0	0	0	0
OTU_5077	Unassigned	Unassigned	Unassigned	Unassigned	Unassigned	Unassigned	Unassigned	352	3	9.71412e-07	0	0	0	0	0	0	0	0	0	0	0	0	0	0	0	0	0	0	0	0	0	0	0	0	0	0	0	0	0	0	0	0	0	0	0	0	0	0	0
OTU_5092	Unassigned	Unassigned	Unassigned	Unassigned	Unassigned	Unassigned	Unassigned	332	3	9.71412e-07	0	0	0	0	0	0	0	0	0	0	0	0	0	0	0	0	0	0	0	0	0	0	0	0	0	0	0	0	0	0	0	0	0	0	0	0	0	0	0
OTU_5097	Unassigned	Unassigned	Unassigned	Unassigned	Unassigned	Unassigned	Unassigned	300	3	9.71412e-07	0	0	0	0	0	0	0	0	0	0	0	0	0	0	0	0	0	0	0	0	0	0	0	0	0	0	0	0	0	0	0	0	0	0	0	0	0	0	0
OTU_5120	Unassigned	Unassigned	Unassigned	Unassigned	Unassigned	Unassigned	Unassigned	335	3	9.71412e-07	0	0	0	0	3	0	0	0	0	0	0	0	0	0	0	0	0	0	0	0	0	0	0	0	0	0	0	0	0	0	0	0	0	0	0	0	0	0	0
OTU_5135	Unassigned	Unassigned	Unassigned	Unassigned	Unassigned	Unassigned	Unassigned	320	3	9.71412e-07	0	0	0	0	0	0	0	0	0	0	0	0	0	0	0	0	0	0	0	0	0	0	0	0	0	0	0	0	0	0	0	0	0	0	0	0	0	0	0
OTU_5218	Unassigned	Unassigned	Unassigned	Unassigned	Unassigned	Unassigned	Unassigned	316	3	9.71412e-07	0	0	0	0	0	0	0	0	0	0	0	0	0	0	0	0	0	0	0	0	0	0	0	0	0	0	0	0	0	0	0	0	0	0	0	0	0	0	0
OTU_5233	Unassigned	Unassigned	Unassigned	Unassigned	Unassigned	Unassigned	Unassigned	370	3	9.71412e-07	0	0	0	0	0	0	0	0	0	0	0	0	0	0	0	0	0	0	0	0	0	0	0	0	0	0	0	0	0	0	0	0	0	0	0	0	0	0	0
OTU_5238	Unassigned	Unassigned	Unassigned	Unassigned	Unassigned	Unassigned	Unassigned	424	3	9.71412e-07	0	0	3	0	0	0	0	0	0	0	0	0	0	0	0	0	0	0	0	0	0	0	0	0	0	0	0	0	0	0	0	0	0	0	0	0	0	0	0
OTU_5243	Unassigned	Unassigned	Unassigned	Unassigned	Unassigned	Unassigned	Unassigned	347	3	9.71412e-07	0	0	0	0	0	0	0	0	0	0	0	0	0	0	0	0	0	0	0	0	0	0	0	0	0	0	0	0	0	0	0	0	0	0	0	0	0	0	0
OTU_5307	Unassigned	Unassigned	Unassigned	Unassigned	Unassigned	Unassigned	Unassigned	343	3	9.71412e-07	0	0	0	0	0	0	0	0	3	0	0	0	0	0	0	0	0	0	0	0	0	0	0	0	0	0	0	0	0	0	0	0	0	0	0	0	0	0	0
OTU_5325	Unassigned	Unassigned	Unassigned	Unassigned	Unassigned	Unassigned	Unassigned	363	3	9.71412e-07	0	0	0	0	0	0	0	0	0	0	0	0	0	0	0	0	0	0	0	0	0	0	0	0	0	0	0	0	0	0	0	0	0	0	0	0	0	0	0
OTU_5366	Unassigned	Unassigned	Unassigned	Unassigned	Unassigned	Unassigned	Unassigned	282	3	9.71412e-07	0	0	0	0	0	0	0	0	0	0	0	0	0	0	0	0	0	0	0	0	0	0	0	0	0	0	0	0	0	0	0	3	0	0	0	0	0	0	0
OTU_5370	Unassigned	Unassigned	Unassigned	Unassigned	Unassigned	Unassigned	Unassigned	351	3	9.71412e-07	0	0	0	0	0	0	0	0	0	0	0	0	0	0	0	0	0	0	0	0	0	0	0	0	0	0	0	0	0	0	0	0	0	0	0	0	0	0	0
OTU_5480	Unassigned	Unassigned	Unassigned	Unassigned	Unassigned	Unassigned	Unassigned	352	3	9.71412e-07	0	0	0	0	0	0	0	0	0	0	0	0	0	0	0	0	0	0	0	0	0	0	0	0	0	0	0	0	0	0	0	0	0	0	0	0	0	0	0
OTU_5510	Unassigned	Unassigned	Unassigned	Unassigned	Unassigned	Unassigned	Unassigned	344	3	9.71412e-07	0	0	0	0	0	0	0	0	0	0	0	0	3	0	0	0	0	0	0	0	0	0	0	0	0	0	0	0	0	0	0	0	0	0	0	0	0	0	0
OTU_5536	Unassigned	Unassigned	Unassigned	Unassigned	Unassigned	Unassigned	Unassigned	350	3	9.71412e-07	0	0	0	0	0	0	3	0	0	0	0	0	0	0	0	0	0	0	0	0	0	0	0	0	0	0	0	0	0	0	0	0	0	0	0	0	0	0	0
OTU_5556	Unassigned	Unassigned	Unassigned	Unassigned	Unassigned	Unassigned	Unassigned	322	3	9.71412e-07	0	0	0	0	0	0	0	0	0	0	0	0	0	3	0	0	0	0	0	0	0	0	0	0	0	0	0	0	0	0	0	0	0	0	0	0	0	0	0
OTU_5583	Unassigned	Unassigned	Unassigned	Unassigned	Unassigned	Unassigned	Unassigned	308	3	9.71412e-07	0	0	0	0	0	0	0	0	0	0	0	0	0	0	0	0	0	0	0	0	0	0	0	0	0	0	0	0	0	0	0	0	0	0	0	3	0	0	0
OTU_5586	Unassigned	Unassigned	Unassigned	Unassigned	Unassigned	Unassigned	Unassigned	303	3	9.71412e-07	0	0	0	0	0	0	0	0	0	0	0	0	0	0	0	0	0	0	0	0	0	0	0	0	0	0	0	0	0	0	0	0	0	0	0	0	0	0	0
OTU_5601	Unassigned	Unassigned	Unassigned	Unassigned	Unassigned	Unassigned	Unassigned	350	3	9.71412e-07	0	0	0	0	0	0	0	0	0	0	0	0	0	0	0	0	0	0	0	0	0	0	0	0	0	0	0	0	0	0	0	0	0	0	3	0	0	0	0
OTU_5606	Unassigned	Unassigned	Unassigned	Unassigned	Unassigned	Unassigned	Unassigned	336	3	9.71412e-07	0	0	0	0	0	0	0	0	0	0	0	0	0	0	0	0	3	0	0	0	0	0	0	0	0	0	0	0	0	0	0	0	0	0	0	0	0	0	0
OTU_5609	Unassigned	Unassigned	Unassigned	Unassigned	Unassigned	Unassigned	Unassigned	430	3	9.71412e-07	0	0	0	0	0	0	0	0	0	0	0	0	0	0	0	0	0	0	0	0	0	0	0	0	0	0	0	0	0	0	0	0	0	0	0	0	0	0	0
OTU_5611	Unassigned	Unassigned	Unassigned	Unassigned	Unassigned	Unassigned	Unassigned	400	3	9.71412e-07	0	0	0	0	0	0	0	0	0	0	0	0	0	0	0	0	0	0	0	0	0	0	0	0	0	0	0	0	0	0	0	0	0	0	0	0	0	0	0
OTU_5616	Unassigned	Unassigned	Unassigned	Unassigned	Unassigned	Unassigned	Unassigned	356	3	9.71412e-07	0	0	0	0	0	0	0	0	0	3	0	0	0	0	0	0	0	0	0	0	0	0	0	0	0	0	0	0	0	0	0	0	0	0	0	0	0	0	0
OTU_5651	Unassigned	Unassigned	Unassigned	Unassigned	Unassigned	Unassigned	Unassigned	340	3	9.71412e-07	0	0	0	0	0	0	0	0	0	0	0	0	0	0	0	0	0	0	0	0	0	0	0	0	0	0	0	0	0	0	0	0	0	0	0	0	0	0	0
OTU_5672	Unassigned	Unassigned	Unassigned	Unassigned	Unassigned	Unassigned	Unassigned	355	3	9.71412e-07	0	0	0	0	0	0	3	0	0	0	0	0	0	0	0	0	0	0	0	0	0	0	0	0	0	0	0	0	0	0	0	0	0	0	0	0	0	0	0
OTU_5675	Unassigned	Unassigned	Unassigned	Unassigned	Unassigned	Unassigned	Unassigned	346	3	9.71412e-07	0	0	0	0	3	0	0	0	0	0	0	0	0	0	0	0	0	0	0	0	0	0	0	0	0	0	0	0	0	0	0	0	0	0	0	0	0	0	0
OTU_5699	Unassigned	Unassigned	Unassigned	Unassigned	Unassigned	Unassigned	Unassigned	343	3	9.71412e-07	0	0	0	0	0	0	0	0	0	0	0	0	0	0	0	0	0	0	0	0	0	0	0	0	0	0	0	0	0	0	0	0	0	0	0	0	0	0	0
OTU_5708	Unassigned	Unassigned	Unassigned	Unassigned	Unassigned	Unassigned	Unassigned	324	3	9.71412e-07	0	0	0	0	0	0	0	0	0	0	0	0	0	0	0	0	0	0	0	0	0	0	0	0	0	0	0	0	0	0	0	0	0	0	0	0	0	0	0
OTU_5715	Unassigned	Unassigned	Unassigned	Unassigned	Unassigned	Unassigned	Unassigned	347	3	9.71412e-07	0	0	0	0	0	0	0	3	0	0	0	0	0	0	0	0	0	0	0	0	0	0	0	0	0	0	0	0	0	0	0	0	0	0	0	0	0	0	0
OTU_5725	Unassigned	Unassigned	Unassigned	Unassigned	Unassigned	Unassigned	Unassigned	374	3	9.71412e-07	0	0	0	0	0	0	0	3	0	0	0	0	0	0	0	0	0	0	0	0	0	0	0	0	0	0	0	0	0	0	0	0	0	0	0	0	0	0	0
OTU_5729	Unassigned	Unassigned	Unassigned	Unassigned	Unassigned	Unassigned	Unassigned	338	3	9.71412e-07	0	0	0	0	0	0	0	0	0	0	0	0	0	0	0	0	0	0	0	0	0	0	0	0	0	0	0	0	0	0	0	0	0	0	0	0	0	0	0
OTU_5750	Unassigned	Unassigned	Unassigned	Unassigned	Unassigned	Unassigned	Unassigned	354	3	9.71412e-07	0	0	0	0	0	0	0	0	0	0	0	0	0	0	0	0	0	0	0	0	0	0	0	0	0	0	0	0	0	0	0	0	0	0	0	0	0	0	0
OTU_5762	Unassigned	Unassigned	Unassigned	Unassigned	Unassigned	Unassigned	Unassigned	431	3	9.71412e-07	0	0	0	0	0	0	0	0	0	0	0	0	0	0	0	0	0	0	0	0	0	0	0	0	0	0	0	0	0	0	0	0	0	0	0	0	0	0	0
OTU_5768	Unassigned	Unassigned	Unassigned	Unassigned	Unassigned	Unassigned	Unassigned	333	3	9.71412e-07	0	0	0	0	0	0	0	0	0	0	0	0	0	0	0	0	0	0	0	0	0	0	0	0	0	0	0	0	0	0	0	0	0	0	3	0	0	0	0
OTU_5774	Unassigned	Unassigned	Unassigned	Unassigned	Unassigned	Unassigned	Unassigned	341	3	9.71412e-07	0	0	0	0	0	0	0	0	0	0	0	0	0	0	0	0	0	0	0	0	0	0	0	0	0	0	0	0	0	0	0	0	0	0	0	0	0	0	0
OTU_5795	Unassigned	Unassigned	Unassigned	Unassigned	Unassigned	Unassigned	Unassigned	337	3	9.71412e-07	0	0	0	0	0	0	0	0	0	0	0	0	0	0	0	0	0	0	0	0	0	0	0	0	0	0	0	0	0	0	0	0	0	0	0	0	0	0	0
OTU_5796	Unassigned	Unassigned	Unassigned	Unassigned	Unassigned	Unassigned	Unassigned	332	3	9.71412e-07	0	0	0	0	0	0	0	0	0	0	0	0	0	0	0	0	0	0	0	0	0	0	0	0	0	0	0	0	0	0	0	0	0	0	0	0	0	0	0
OTU_5830	Unassigned	Unassigned	Unassigned	Unassigned	Unassigned	Unassigned	Unassigned	332	3	9.71412e-07	0	0	0	0	0	0	0	0	0	0	0	0	0	0	0	0	0	0	0	0	0	0	0	0	0	0	0	0	0	0	0	0	0	0	0	0	0	0	0
OTU_5862	Unassigned	Unassigned	Unassigned	Unassigned	Unassigned	Unassigned	Unassigned	277	3	9.71412e-07	0	0	0	0	0	0	0	0	0	0	0	0	0	0	0	0	0	0	0	0	0	0	0	0	0	0	0	0	0	0	0	0	0	0	0	0	0	0	0
OTU_5888	Unassigned	Unassigned	Unassigned	Unassigned	Unassigned	Unassigned	Unassigned	346	3	9.71412e-07	0	0	0	3	0	0	0	0	0	0	0	0	0	0	0	0	0	0	0	0	0	0	0	0	0	0	0	0	0	0	0	0	0	0	0	0	0	0	0
OTU_5911	Unassigned	Unassigned	Unassigned	Unassigned	Unassigned	Unassigned	Unassigned	365	3	9.71412e-07	0	0	0	0	0	0	0	0	0	0	0	0	0	0	0	0	0	0	0	0	0	0	0	3	0	0	0	0	0	0	0	0	0	0	0	0	0	0	0
OTU_5929	Unassigned	Unassigned	Unassigned	Unassigned	Unassigned	Unassigned	Unassigned	271	3	9.71412e-07	0	0	0	0	0	0	0	0	0	0	0	0	0	0	0	0	0	0	0	0	0	0	0	0	0	0	0	0	0	0	0	0	0	0	0	0	0	0	0
OTU_5931	Unassigned	Unassigned	Unassigned	Unassigned	Unassigned	Unassigned	Unassigned	324	3	9.71412e-07	0	0	0	0	0	0	0	0	0	0	0	0	0	0	0	0	0	0	0	0	0	0	0	0	0	0	0	0	0	0	0	0	0	0	3	0	0	0	0
OTU_5945	Unassigned	Unassigned	Unassigned	Unassigned	Unassigned	Unassigned	Unassigned	369	3	9.71412e-07	0	0	0	0	0	0	0	3	0	0	0	0	0	0	0	0	0	0	0	0	0	0	0	0	0	0	0	0	0	0	0	0	0	0	0	0	0	0	0
OTU_5962	Unassigned	Unassigned	Unassigned	Unassigned	Unassigned	Unassigned	Unassigned	328	3	9.71412e-07	0	0	0	0	0	0	0	0	0	0	0	0	0	0	0	0	0	0	0	0	0	0	0	0	0	0	0	0	0	0	0	0	0	0	0	0	0	0	0
OTU_5989	Unassigned	Unassigned	Unassigned	Unassigned	Unassigned	Unassigned	Unassigned	319	3	9.71412e-07	0	0	0	0	0	0	0	0	0	0	0	0	0	0	0	0	0	0	0	0	0	0	0	0	0	0	0	0	0	0	0	0	0	0	0	0	3	0	0
OTU_6018	Unassigned	Unassigned	Unassigned	Unassigned	Unassigned	Unassigned	Unassigned	281	3	9.71412e-07	0	0	0	0	0	0	0	0	0	0	0	0	0	0	0	0	0	0	0	0	0	0	0	0	0	0	0	0	0	0	0	3	0	0	0	0	0	0	0
OTU_6032	Unassigned	Unassigned	Unassigned	Unassigned	Unassigned	Unassigned	Unassigned	345	3	9.71412e-07	0	0	0	0	0	0	0	0	0	0	0	0	0	0	0	0	0	0	0	0	0	0	0	0	0	0	0	0	0	0	0	0	0	0	0	0	0	0	0
OTU_6036	Unassigned	Unassigned	Unassigned	Unassigned	Unassigned	Unassigned	Unassigned	353	3	9.71412e-07	0	0	0	0	0	0	0	0	0	0	0	0	0	0	0	0	0	0	0	0	0	0	0	0	0	0	0	0	0	0	0	0	0	0	0	0	3	0	0
OTU_6042	Unassigned	Unassigned	Unassigned	Unassigned	Unassigned	Unassigned	Unassigned	347	3	9.71412e-07	0	0	0	0	0	0	0	0	0	0	0	0	0	0	0	0	0	0	0	0	0	0	0	0	0	0	0	0	0	0	0	0	0	0	0	0	0	0	0
OTU_6048	Unassigned	Unassigned	Unassigned	Unassigned	Unassigned	Unassigned	Unassigned	326	3	9.71412e-07	0	0	0	0	0	0	0	0	0	0	0	0	0	0	0	0	0	0	0	0	0	0	0	0	0	0	0	0	0	0	0	0	0	0	0	0	0	0	0
OTU_6054	Unassigned	Unassigned	Unassigned	Unassigned	Unassigned	Unassigned	Unassigned	335	3	9.71412e-07	0	0	0	0	0	0	0	0	0	0	0	0	0	0	0	0	0	0	0	0	0	0	0	3	0	0	0	0	0	0	0	0	0	0	0	0	0	0	0
OTU_6060	Unassigned	Unassigned	Unassigned	Unassigned	Unassigned	Unassigned	Unassigned	335	3	9.71412e-07	0	0	0	0	0	0	0	0	0	0	0	0	0	0	0	0	0	0	0	0	0	0	0	0	0	0	0	0	0	0	0	0	0	0	0	0	0	0	0
OTU_6061	Unassigned	Unassigned	Unassigned	Unassigned	Unassigned	Unassigned	Unassigned	346	3	9.71412e-07	0	0	0	0	0	0	0	0	0	0	0	0	0	0	0	0	0	0	0	0	0	0	0	0	0	0	0	0	0	0	0	0	0	0	0	0	3	0	0
OTU_6072	Unassigned	Unassigned	Unassigned	Unassigned	Unassigned	Unassigned	Unassigned	258	3	9.71412e-07	0	0	0	0	0	0	0	0	0	0	0	0	0	0	0	0	0	0	0	0	0	0	0	0	0	0	0	0	0	0	0	0	0	0	0	3	0	0	0
OTU_6085	Unassigned	Unassigned	Unassigned	Unassigned	Unassigned	Unassigned	Unassigned	293	3	9.71412e-07	0	0	0	0	0	0	0	0	0	0	0	0	0	0	0	0	0	0	0	0	0	0	0	0	0	0	0	0	0	0	0	0	0	0	0	0	0	0	0
OTU_6097	Unassigned	Unassigned	Unassigned	Unassigned	Unassigned	Unassigned	Unassigned	352	3	9.71412e-07	0	0	0	0	0	0	0	0	0	0	0	0	0	0	0	0	0	0	0	0	0	0	0	0	0	0	0	0	0	0	0	0	0	0	0	0	0	0	0
OTU_6100	Unassigned	Unassigned	Unassigned	Unassigned	Unassigned	Unassigned	Unassigned	455	3	9.71412e-07	0	0	0	0	0	0	0	0	0	0	0	0	3	0	0	0	0	0	0	0	0	0	0	0	0	0	0	0	0	0	0	0	0	0	0	0	0	0	0
OTU_6131	Unassigned	Unassigned	Unassigned	Unassigned	Unassigned	Unassigned	Unassigned	312	3	9.71412e-07	0	0	0	0	0	0	0	0	0	0	0	0	0	0	0	0	0	0	0	0	0	0	0	0	0	0	0	0	0	0	0	0	0	0	0	0	0	0	0
OTU_6139	Unassigned	Unassigned	Unassigned	Unassigned	Unassigned	Unassigned	Unassigned	355	3	9.71412e-07	0	0	0	0	0	0	0	0	0	0	0	0	0	0	0	0	0	0	0	0	0	0	0	0	0	0	0	0	0	0	0	0	0	0	0	0	0	0	0
OTU_6143	Unassigned	Unassigned	Unassigned	Unassigned	Unassigned	Unassigned	Unassigned	262	3	9.71412e-07	0	0	0	0	0	0	0	0	0	0	0	0	0	0	0	0	0	0	0	0	0	0	0	0	0	0	0	0	0	0	0	0	0	0	0	0	0	0	0
OTU_6181	Unassigned	Unassigned	Unassigned	Unassigned	Unassigned	Unassigned	Unassigned	358	3	9.71412e-07	0	0	0	0	0	0	0	0	0	0	0	0	0	0	0	0	0	0	0	0	0	0	0	0	0	0	0	0	0	0	0	0	0	0	0	0	0	0	0
OTU_6185	Unassigned	Unassigned	Unassigned	Unassigned	Unassigned	Unassigned	Unassigned	316	3	9.71412e-07	0	0	0	0	0	0	0	0	0	0	0	0	0	0	0	0	0	0	0	0	0	0	0	0	0	0	0	0	0	0	0	0	0	0	0	0	0	0	0
OTU_6220	Unassigned	Unassigned	Unassigned	Unassigned	Unassigned	Unassigned	Unassigned	331	3	9.71412e-07	0	0	0	0	0	0	0	0	0	0	0	0	0	0	0	0	0	0	0	0	0	0	0	3	0	0	0	0	0	0	0	0	0	0	0	0	0	0	0
OTU_6240	Unassigned	Unassigned	Unassigned	Unassigned	Unassigned	Unassigned	Unassigned	339	3	9.71412e-07	0	0	0	0	0	0	0	0	0	0	0	0	0	0	0	0	0	0	0	0	0	0	0	3	0	0	0	0	0	0	0	0	0	0	0	0	0	0	0
OTU_6245	Unassigned	Unassigned	Unassigned	Unassigned	Unassigned	Unassigned	Unassigned	349	3	9.71412e-07	0	0	0	0	0	0	0	0	0	0	0	0	0	0	0	0	0	0	0	0	0	0	0	0	0	0	0	0	0	0	0	0	0	0	0	0	0	0	0
OTU_6307	Unassigned	Unassigned	Unassigned	Unassigned	Unassigned	Unassigned	Unassigned	277	3	9.71412e-07	0	0	0	0	0	0	0	0	0	0	0	0	0	0	0	0	0	0	0	0	0	0	0	0	0	3	0	0	0	0	0	0	0	0	0	0	0	0	0
OTU_6314	Unassigned	Unassigned	Unassigned	Unassigned	Unassigned	Unassigned	Unassigned	365	3	9.71412e-07	0	0	0	0	0	0	0	0	0	0	0	0	0	0	0	0	0	0	0	0	0	0	0	0	0	0	0	0	0	3	0	0	0	0	0	0	0	0	0
OTU_6318	Unassigned	Unassigned	Unassigned	Unassigned	Unassigned	Unassigned	Unassigned	283	3	9.71412e-07	0	0	0	0	0	0	0	0	0	0	0	0	0	0	0	0	0	0	0	0	0	0	0	0	0	0	3	0	0	0	0	0	0	0	0	0	0	0	0
OTU_6322	Unassigned	Unassigned	Unassigned	Unassigned	Unassigned	Unassigned	Unassigned	370	3	9.71412e-07	0	0	0	0	0	0	0	0	0	0	0	0	0	0	0	0	0	0	0	0	0	0	0	0	0	0	0	0	0	0	0	0	0	0	0	0	0	0	0
OTU_6342	Unassigned	Unassigned	Unassigned	Unassigned	Unassigned	Unassigned	Unassigned	333	3	9.71412e-07	0	0	0	0	0	0	0	0	0	0	0	0	0	0	0	0	0	0	0	0	0	0	0	3	0	0	0	0	0	0	0	0	0	0	0	0	0	0	0
OTU_6344	Unassigned	Unassigned	Unassigned	Unassigned	Unassigned	Unassigned	Unassigned	345	3	9.71412e-07	0	0	0	0	0	0	0	0	0	0	0	0	0	0	0	0	0	0	0	0	0	0	0	0	0	0	0	0	0	0	0	0	0	0	0	0	0	0	0
OTU_6365	Unassigned	Unassigned	Unassigned	Unassigned	Unassigned	Unassigned	Unassigned	345	3	9.71412e-07	0	0	0	0	0	0	0	0	0	0	0	0	0	0	0	0	0	3	0	0	0	0	0	0	0	0	0	0	0	0	0	0	0	0	0	0	0	0	0
OTU_6376	Unassigned	Unassigned	Unassigned	Unassigned	Unassigned	Unassigned	Unassigned	352	3	9.71412e-07	0	0	0	0	0	0	0	0	0	0	0	0	0	0	0	0	0	0	0	0	0	0	0	0	0	0	0	0	0	0	0	0	0	0	0	0	0	0	0
OTU_6378	Unassigned	Unassigned	Unassigned	Unassigned	Unassigned	Unassigned	Unassigned	352	3	9.71412e-07	0	0	0	0	0	0	0	0	0	0	0	0	0	0	0	0	0	0	0	0	0	0	0	0	0	0	0	0	0	0	3	0	0	0	0	0	0	0	0
OTU_6382	Unassigned	Unassigned	Unassigned	Unassigned	Unassigned	Unassigned	Unassigned	331	3	9.71412e-07	0	0	0	0	0	0	0	0	0	0	0	0	0	0	0	0	0	0	0	0	0	0	0	0	0	0	0	0	0	0	0	0	0	0	0	0	0	0	0
OTU_6390	Unassigned	Unassigned	Unassigned	Unassigned	Unassigned	Unassigned	Unassigned	337	3	9.71412e-07	0	0	0	0	0	0	0	0	0	0	0	0	0	0	0	0	0	0	0	0	0	0	0	0	0	0	0	0	0	0	0	0	0	0	0	0	0	0	0
OTU_6420	Unassigned	Unassigned	Unassigned	Unassigned	Unassigned	Unassigned	Unassigned	281	3	9.71412e-07	0	0	0	0	0	0	0	0	0	0	0	0	0	0	0	0	0	0	0	0	0	0	0	0	0	0	0	0	0	0	0	0	0	0	0	0	0	0	0
OTU_6431	Unassigned	Unassigned	Unassigned	Unassigned	Unassigned	Unassigned	Unassigned	353	3	9.71412e-07	0	0	0	0	0	0	0	0	0	0	0	0	0	0	0	0	0	0	0	0	0	0	0	0	0	0	0	0	0	0	0	0	0	0	0	0	0	0	0
OTU_6437	Unassigned	Unassigned	Unassigned	Unassigned	Unassigned	Unassigned	Unassigned	333	3	9.71412e-07	0	0	0	0	0	0	0	0	0	0	0	0	0	0	0	0	0	0	0	0	0	0	0	0	0	0	0	0	0	0	0	0	0	0	0	0	0	0	0
OTU_6454	Unassigned	Unassigned	Unassigned	Unassigned	Unassigned	Unassigned	Unassigned	339	3	9.71412e-07	0	0	0	0	0	0	0	0	0	0	0	0	0	0	0	0	0	0	0	0	0	0	0	0	0	0	0	0	0	0	0	0	0	0	0	0	0	0	0
OTU_6463	Unassigned	Unassigned	Unassigned	Unassigned	Unassigned	Unassigned	Unassigned	347	3	9.71412e-07	0	0	0	0	0	0	0	0	0	0	0	0	0	0	0	0	0	0	0	0	0	0	0	0	0	0	0	0	0	0	0	0	0	0	0	0	0	0	0
OTU_6465	Unassigned	Unassigned	Unassigned	Unassigned	Unassigned	Unassigned	Unassigned	452	3	9.71412e-07	0	0	0	0	0	0	0	0	0	0	0	0	0	0	0	0	0	0	0	0	0	0	0	0	0	0	0	0	0	0	0	0	0	0	0	0	0	0	0
OTU_6483	Unassigned	Unassigned	Unassigned	Unassigned	Unassigned	Unassigned	Unassigned	251	3	9.71412e-07	0	0	0	0	3	0	0	0	0	0	0	0	0	0	0	0	0	0	0	0	0	0	0	0	0	0	0	0	0	0	0	0	0	0	0	0	0	0	0
OTU_6496	Unassigned	Unassigned	Unassigned	Unassigned	Unassigned	Unassigned	Unassigned	281	3	9.71412e-07	0	0	0	0	0	0	0	0	0	0	0	0	0	0	0	0	0	0	0	0	0	0	0	0	0	0	0	0	0	0	0	0	0	0	0	0	0	0	0
OTU_6511	Unassigned	Unassigned	Unassigned	Unassigned	Unassigned	Unassigned	Unassigned	320	3	9.71412e-07	0	0	0	0	0	0	0	0	0	0	0	0	0	0	0	0	0	0	0	0	0	0	0	0	0	0	0	0	0	0	0	0	0	0	0	0	0	0	0
OTU_6521	Unassigned	Unassigned	Unassigned	Unassigned	Unassigned	Unassigned	Unassigned	338	3	9.71412e-07	0	0	0	0	0	0	0	0	3	0	0	0	0	0	0	0	0	0	0	0	0	0	0	0	0	0	0	0	0	0	0	0	0	0	0	0	0	0	0
OTU_6529	Unassigned	Unassigned	Unassigned	Unassigned	Unassigned	Unassigned	Unassigned	341	3	9.71412e-07	0	0	0	0	0	0	0	0	0	0	0	0	0	0	0	0	0	0	0	0	0	0	0	0	0	0	0	0	0	0	0	0	0	0	0	0	0	0	0
OTU_6550	Unassigned	Unassigned	Unassigned	Unassigned	Unassigned	Unassigned	Unassigned	322	3	9.71412e-07	0	0	0	0	3	0	0	0	0	0	0	0	0	0	0	0	0	0	0	0	0	0	0	0	0	0	0	0	0	0	0	0	0	0	0	0	0	0	0
OTU_6557	Unassigned	Unassigned	Unassigned	Unassigned	Unassigned	Unassigned	Unassigned	358	3	9.71412e-07	0	0	0	0	0	0	0	0	0	0	0	0	0	0	0	0	0	0	0	0	0	0	0	0	0	0	0	0	0	0	0	0	0	0	0	3	0	0	0
OTU_6559	Unassigned	Unassigned	Unassigned	Unassigned	Unassigned	Unassigned	Unassigned	284	3	9.71412e-07	0	0	0	0	0	0	0	0	0	0	0	0	0	0	0	0	0	0	0	0	0	0	0	0	0	0	0	0	0	0	0	0	0	0	0	0	0	0	0
OTU_6571	Unassigned	Unassigned	Unassigned	Unassigned	Unassigned	Unassigned	Unassigned	361	3	9.71412e-07	0	0	0	0	0	0	0	0	0	0	0	0	0	0	0	0	0	0	0	0	0	0	0	0	0	0	0	0	0	0	0	0	0	0	0	0	0	0	0
OTU_6587	Unassigned	Unassigned	Unassigned	Unassigned	Unassigned	Unassigned	Unassigned	377	3	9.71412e-07	0	0	0	0	0	0	0	0	0	0	0	0	0	0	0	0	0	0	0	0	0	0	0	0	0	0	0	0	0	0	0	0	0	0	0	0	3	0	0
OTU_6594	Unassigned	Unassigned	Unassigned	Unassigned	Unassigned	Unassigned	Unassigned	410	3	9.71412e-07	0	0	0	0	0	0	0	0	0	0	0	0	0	0	0	0	0	0	0	0	0	0	0	0	0	0	0	0	0	0	0	0	0	0	0	3	0	0	0
OTU_6613	Unassigned	Unassigned	Unassigned	Unassigned	Unassigned	Unassigned	Unassigned	325	3	9.71412e-07	0	0	0	0	0	0	0	0	0	0	0	0	0	0	0	0	0	0	0	0	0	0	0	0	0	0	0	0	0	0	0	3	0	0	0	0	0	0	0
OTU_6615	Unassigned	Unassigned	Unassigned	Unassigned	Unassigned	Unassigned	Unassigned	340	3	9.71412e-07	0	0	0	0	0	0	0	0	0	0	0	0	0	0	0	0	0	0	0	0	0	0	0	0	0	0	0	0	0	0	0	0	0	0	0	0	0	0	0
OTU_6624	Unassigned	Unassigned	Unassigned	Unassigned	Unassigned	Unassigned	Unassigned	410	3	9.71412e-07	0	0	0	0	0	0	0	0	0	0	0	0	0	0	0	0	0	0	0	0	0	0	0	0	0	0	0	0	0	0	0	0	0	0	0	0	0	0	0
OTU_6627	Unassigned	Unassigned	Unassigned	Unassigned	Unassigned	Unassigned	Unassigned	335	3	9.71412e-07	0	0	0	0	0	0	0	0	0	0	0	0	0	0	0	0	0	0	0	0	0	0	0	0	0	0	0	0	0	0	0	0	0	0	0	0	0	0	0
OTU_6638	Unassigned	Unassigned	Unassigned	Unassigned	Unassigned	Unassigned	Unassigned	369	3	9.71412e-07	0	0	0	0	0	0	0	0	0	0	0	0	0	0	0	0	0	0	0	0	0	0	0	0	0	0	0	0	0	0	0	0	0	0	0	0	0	0	0
OTU_6639	Unassigned	Unassigned	Unassigned	Unassigned	Unassigned	Unassigned	Unassigned	368	3	9.71412e-07	0	0	0	0	0	0	0	0	0	0	0	0	0	0	0	0	0	0	0	0	0	0	0	0	0	0	0	0	0	0	0	0	0	0	0	0	0	0	0
OTU_6641	Unassigned	Unassigned	Unassigned	Unassigned	Unassigned	Unassigned	Unassigned	344	3	9.71412e-07	0	0	0	0	0	0	0	0	0	0	0	0	0	0	0	0	0	0	0	0	0	0	0	0	0	0	0	0	0	0	0	0	0	0	0	0	0	0	0
OTU_6642	Unassigned	Unassigned	Unassigned	Unassigned	Unassigned	Unassigned	Unassigned	260	3	9.71412e-07	0	0	0	0	0	0	0	0	0	0	0	0	0	0	0	0	0	0	0	0	0	0	0	0	0	0	0	0	0	0	0	0	0	0	0	0	0	0	0
OTU_6647	Unassigned	Unassigned	Unassigned	Unassigned	Unassigned	Unassigned	Unassigned	323	3	9.71412e-07	0	0	0	0	0	0	0	0	0	0	0	0	0	0	0	0	0	0	0	0	0	0	0	0	0	0	0	0	0	0	0	0	0	0	0	0	0	0	0
OTU_6683	Unassigned	Unassigned	Unassigned	Unassigned	Unassigned	Unassigned	Unassigned	346	3	9.71412e-07	0	0	0	0	0	0	0	0	0	1	0	0	0	0	0	0	0	0	0	0	0	0	0	0	0	0	0	0	0	0	0	0	0	0	0	0	0	0	0
OTU_6699	Unassigned	Unassigned	Unassigned	Unassigned	Unassigned	Unassigned	Unassigned	334	3	9.71412e-07	0	0	0	0	0	0	0	0	0	0	0	0	0	0	0	0	0	0	0	0	0	0	0	0	0	0	0	0	0	0	0	0	0	0	0	0	0	0	0
OTU_6715	Unassigned	Unassigned	Unassigned	Unassigned	Unassigned	Unassigned	Unassigned	324	3	9.71412e-07	0	0	0	0	0	0	0	0	0	0	0	0	0	0	0	0	0	0	0	0	0	0	0	0	0	0	0	0	0	0	0	0	0	0	0	0	0	0	0
OTU_6720	Unassigned	Unassigned	Unassigned	Unassigned	Unassigned	Unassigned	Unassigned	466	3	9.71412e-07	0	0	0	0	0	0	0	0	0	0	0	0	0	0	0	0	0	0	0	0	0	0	0	0	0	0	0	0	0	0	0	0	0	0	0	0	0	0	0
OTU_6736	Unassigned	Unassigned	Unassigned	Unassigned	Unassigned	Unassigned	Unassigned	386	3	9.71412e-07	0	0	0	0	0	0	0	0	0	0	0	0	0	0	0	0	0	0	0	0	0	0	0	0	0	0	0	0	0	0	0	0	0	0	3	0	0	0	0
OTU_6743	Unassigned	Unassigned	Unassigned	Unassigned	Unassigned	Unassigned	Unassigned	366	3	9.71412e-07	0	0	0	0	0	0	0	0	0	0	0	0	0	0	0	0	0	0	0	0	0	0	0	0	0	0	0	0	0	0	0	0	0	0	0	0	0	0	0
OTU_6749	Unassigned	Unassigned	Unassigned	Unassigned	Unassigned	Unassigned	Unassigned	317	3	9.71412e-07	0	0	0	0	0	0	0	0	0	0	0	0	0	0	0	0	0	0	0	0	0	0	0	0	0	0	0	0	0	0	0	0	0	0	0	0	0	0	0
OTU_6755	Unassigned	Unassigned	Unassigned	Unassigned	Unassigned	Unassigned	Unassigned	333	3	9.71412e-07	0	0	0	0	0	0	0	0	0	0	0	0	0	0	0	0	0	0	0	0	0	0	0	0	0	0	0	0	0	0	0	0	0	0	0	0	0	0	0
OTU_6778	Unassigned	Unassigned	Unassigned	Unassigned	Unassigned	Unassigned	Unassigned	304	3	9.71412e-07	0	0	0	0	0	0	0	0	0	0	0	0	0	0	0	0	0	0	0	0	0	0	0	0	0	0	0	0	0	0	0	0	0	0	0	0	0	0	0
OTU_6781	Unassigned	Unassigned	Unassigned	Unassigned	Unassigned	Unassigned	Unassigned	337	3	9.71412e-07	0	0	0	0	0	0	0	0	0	0	0	0	0	0	0	0	0	0	0	0	0	0	0	0	0	0	0	0	0	0	0	0	0	0	0	0	0	0	0
OTU_6790	Unassigned	Unassigned	Unassigned	Unassigned	Unassigned	Unassigned	Unassigned	325	3	9.71412e-07	0	0	0	0	0	0	0	0	0	0	0	0	0	0	0	0	0	0	0	0	0	0	0	0	0	0	0	0	0	0	0	0	0	0	0	0	0	0	0
OTU_6797	Unassigned	Unassigned	Unassigned	Unassigned	Unassigned	Unassigned	Unassigned	416	3	9.71412e-07	0	0	0	0	0	0	0	0	0	0	0	0	0	0	0	0	0	0	0	0	0	0	0	0	0	0	0	0	0	0	0	0	0	0	0	0	0	0	0
OTU_6799	Unassigned	Unassigned	Unassigned	Unassigned	Unassigned	Unassigned	Unassigned	345	3	9.71412e-07	0	0	0	0	0	0	0	0	0	0	0	0	0	0	0	0	0	0	0	0	0	0	0	0	0	0	0	0	0	0	0	0	0	0	0	0	0	0	0
OTU_6802	Unassigned	Unassigned	Unassigned	Unassigned	Unassigned	Unassigned	Unassigned	297	3	9.71412e-07	0	0	0	0	0	0	0	0	0	0	0	0	0	0	0	0	0	0	0	0	0	0	0	0	0	0	0	0	0	0	0	0	0	0	0	0	0	0	0
OTU_6812	Unassigned	Unassigned	Unassigned	Unassigned	Unassigned	Unassigned	Unassigned	332	3	9.71412e-07	0	0	0	0	0	0	0	0	0	0	0	0	0	0	0	0	0	0	0	0	0	0	0	0	0	0	0	0	0	0	0	0	0	0	0	0	0	0	0
OTU_6817	Unassigned	Unassigned	Unassigned	Unassigned	Unassigned	Unassigned	Unassigned	356	3	9.71412e-07	0	0	0	0	0	0	0	0	0	0	0	0	0	0	0	0	0	0	0	0	0	0	0	0	0	0	0	0	0	0	0	0	0	0	0	0	0	0	0
OTU_6820	Unassigned	Unassigned	Unassigned	Unassigned	Unassigned	Unassigned	Unassigned	345	3	9.71412e-07	0	0	0	0	0	0	0	0	0	0	0	0	0	0	0	0	0	0	0	0	0	0	0	0	0	0	0	0	0	0	0	0	0	0	0	0	0	0	0
OTU_6822	Unassigned	Unassigned	Unassigned	Unassigned	Unassigned	Unassigned	Unassigned	397	3	9.71412e-07	0	0	0	0	0	0	0	0	0	0	3	0	0	0	0	0	0	0	0	0	0	0	0	0	0	0	0	0	0	0	0	0	0	0	0	0	0	0	0
OTU_6835	Unassigned	Unassigned	Unassigned	Unassigned	Unassigned	Unassigned	Unassigned	342	3	9.71412e-07	0	0	0	0	0	0	0	0	0	0	0	0	0	0	0	0	0	0	0	0	0	0	0	0	0	0	0	0	0	0	0	0	0	0	0	0	0	0	0
OTU_6838	Unassigned	Unassigned	Unassigned	Unassigned	Unassigned	Unassigned	Unassigned	361	3	9.71412e-07	0	0	0	0	0	0	0	0	0	0	0	0	0	0	0	0	0	0	0	0	0	0	0	0	0	0	0	0	0	0	0	0	0	0	0	0	0	0	0
OTU_6845	Unassigned	Unassigned	Unassigned	Unassigned	Unassigned	Unassigned	Unassigned	353	3	9.71412e-07	0	0	0	0	0	0	0	0	0	0	0	0	0	0	0	0	0	0	0	0	0	0	0	0	0	0	0	0	0	0	0	0	0	0	0	0	0	0	0
OTU_6868	Unassigned	Unassigned	Unassigned	Unassigned	Unassigned	Unassigned	Unassigned	348	3	9.71412e-07	0	0	0	0	0	0	0	0	0	0	0	0	0	0	0	0	0	0	0	0	0	0	0	0	0	0	0	0	0	0	0	0	0	0	0	0	0	0	0
OTU_6879	Unassigned	Unassigned	Unassigned	Unassigned	Unassigned	Unassigned	Unassigned	357	3	9.71412e-07	0	0	0	0	0	0	0	0	0	0	0	0	0	0	0	0	0	0	0	0	0	0	0	0	0	0	0	0	0	0	0	0	0	0	0	0	0	0	0
OTU_6892	Unassigned	Unassigned	Unassigned	Unassigned	Unassigned	Unassigned	Unassigned	311	3	9.71412e-07	0	0	0	0	0	0	0	0	0	0	0	0	0	0	0	0	0	0	0	0	0	0	0	0	0	0	0	0	0	0	0	0	0	0	0	0	0	0	0
OTU_6899	Unassigned	Unassigned	Unassigned	Unassigned	Unassigned	Unassigned	Unassigned	331	3	9.71412e-07	0	0	0	0	0	0	0	0	0	0	0	0	0	0	0	0	0	0	0	0	0	0	0	0	0	0	0	0	0	0	0	0	0	0	0	0	0	0	0
OTU_6920	Unassigned	Unassigned	Unassigned	Unassigned	Unassigned	Unassigned	Unassigned	345	3	9.71412e-07	0	0	0	0	0	0	0	0	0	0	0	0	0	0	0	0	0	0	0	0	0	0	0	0	0	0	0	0	0	0	0	0	0	0	0	0	0	0	0
OTU_6977	Unassigned	Unassigned	Unassigned	Unassigned	Unassigned	Unassigned	Unassigned	462	3	9.71412e-07	3	0	0	0	0	0	0	0	0	0	0	0	0	0	0	0	0	0	0	0	0	0	0	0	0	0	0	0	0	0	0	0	0	0	0	0	0	0	0
OTU_6984	Unassigned	Unassigned	Unassigned	Unassigned	Unassigned	Unassigned	Unassigned	344	3	9.71412e-07	0	0	0	0	0	0	0	0	0	0	0	0	0	0	0	0	0	0	0	0	0	0	0	0	0	0	0	0	0	0	0	0	0	0	0	0	3	0	0
OTU_7005	Unassigned	Unassigned	Unassigned	Unassigned	Unassigned	Unassigned	Unassigned	318	3	9.71412e-07	0	0	0	0	0	0	0	0	0	0	0	0	0	0	0	0	3	0	0	0	0	0	0	0	0	0	0	0	0	0	0	0	0	0	0	0	0	0	0
OTU_7010	Unassigned	Unassigned	Unassigned	Unassigned	Unassigned	Unassigned	Unassigned	351	3	9.71412e-07	0	0	0	0	0	0	0	0	0	0	0	0	0	0	0	0	0	0	0	0	0	0	0	0	0	0	0	0	0	0	0	0	0	0	0	0	0	0	0
OTU_7013	Unassigned	Unassigned	Unassigned	Unassigned	Unassigned	Unassigned	Unassigned	269	3	9.71412e-07	0	0	0	0	0	0	0	0	0	0	0	0	0	0	0	0	0	0	0	0	0	0	0	0	0	0	0	0	0	0	0	0	0	0	0	0	0	0	0
OTU_7014	Unassigned	Unassigned	Unassigned	Unassigned	Unassigned	Unassigned	Unassigned	453	3	9.71412e-07	0	0	0	0	0	0	0	0	0	0	0	0	0	0	0	0	0	0	0	0	0	0	0	0	0	0	0	0	0	0	0	0	0	0	0	0	0	3	0
OTU_7018	Unassigned	Unassigned	Unassigned	Unassigned	Unassigned	Unassigned	Unassigned	326	3	9.71412e-07	0	0	0	0	0	0	0	0	0	0	0	0	0	0	0	0	0	0	0	0	0	0	0	0	0	0	0	0	0	0	0	0	0	0	0	0	0	0	0
OTU_7030	Unassigned	Unassigned	Unassigned	Unassigned	Unassigned	Unassigned	Unassigned	407	3	9.71412e-07	0	0	0	0	0	0	0	0	0	0	0	0	0	0	0	0	0	0	0	0	0	0	0	0	0	0	0	0	0	0	0	0	0	0	0	0	0	0	0
OTU_7054	Unassigned	Unassigned	Unassigned	Unassigned	Unassigned	Unassigned	Unassigned	350	3	9.71412e-07	0	0	0	0	0	0	3	0	0	0	0	0	0	0	0	0	0	0	0	0	0	0	0	0	0	0	0	0	0	0	0	0	0	0	0	0	0	0	0
OTU_7081	Unassigned	Unassigned	Unassigned	Unassigned	Unassigned	Unassigned	Unassigned	333	3	9.71412e-07	0	0	0	0	0	0	0	0	0	0	0	0	0	0	0	0	3	0	0	0	0	0	0	0	0	0	0	0	0	0	0	0	0	0	0	0	0	0	0
OTU_7097	Unassigned	Unassigned	Unassigned	Unassigned	Unassigned	Unassigned	Unassigned	341	3	9.71412e-07	0	0	0	0	0	0	0	0	0	0	0	0	0	0	0	0	0	3	0	0	0	0	0	0	0	0	0	0	0	0	0	0	0	0	0	0	0	0	0
OTU_7100	Unassigned	Unassigned	Unassigned	Unassigned	Unassigned	Unassigned	Unassigned	382	3	9.71412e-07	0	0	0	0	0	0	0	0	0	0	0	0	0	0	0	0	0	0	0	0	0	0	0	0	0	0	0	0	0	0	0	0	0	0	0	0	0	0	0
OTU_7109	Unassigned	Unassigned	Unassigned	Unassigned	Unassigned	Unassigned	Unassigned	344	3	9.71412e-07	0	0	0	0	0	0	0	0	0	0	0	0	0	0	0	0	0	0	0	0	0	0	0	0	0	0	0	0	0	0	0	0	0	0	0	0	0	0	0
OTU_7128	Unassigned	Unassigned	Unassigned	Unassigned	Unassigned	Unassigned	Unassigned	332	3	9.71412e-07	0	0	0	0	0	0	0	0	0	0	0	0	0	0	0	0	0	0	0	0	0	0	0	0	0	0	0	0	0	0	0	0	0	0	0	0	0	0	0
OTU_7133	Unassigned	Unassigned	Unassigned	Unassigned	Unassigned	Unassigned	Unassigned	431	3	9.71412e-07	0	0	0	0	0	0	0	0	0	0	0	0	0	0	0	0	0	0	0	0	0	0	0	0	0	0	0	0	0	0	0	0	0	0	0	3	0	0	0
OTU_7137	Unassigned	Unassigned	Unassigned	Unassigned	Unassigned	Unassigned	Unassigned	326	3	9.71412e-07	0	0	0	0	0	0	0	0	0	0	0	0	0	0	0	0	0	0	0	0	0	0	0	0	0	0	0	0	0	0	0	0	0	0	0	0	0	0	3
OTU_7169	Unassigned	Unassigned	Unassigned	Unassigned	Unassigned	Unassigned	Unassigned	366	3	9.71412e-07	0	0	0	0	0	0	0	0	0	0	0	0	0	0	0	0	0	0	0	0	0	0	0	0	0	0	0	0	0	0	0	0	0	0	0	0	0	0	0
OTU_7173	Unassigned	Unassigned	Unassigned	Unassigned	Unassigned	Unassigned	Unassigned	291	3	9.71412e-07	0	0	0	0	0	0	0	0	0	0	0	0	0	0	0	0	0	0	0	0	0	0	0	0	0	0	0	0	0	0	0	0	0	0	0	0	0	0	0
OTU_7207	Unassigned	Unassigned	Unassigned	Unassigned	Unassigned	Unassigned	Unassigned	476	3	9.71412e-07	0	0	0	0	0	0	0	0	0	0	0	0	0	0	0	0	0	0	0	0	0	0	0	3	0	0	0	0	0	0	0	0	0	0	0	0	0	0	0
OTU_7208	Unassigned	Unassigned	Unassigned	Unassigned	Unassigned	Unassigned	Unassigned	344	3	9.71412e-07	0	0	0	0	0	0	0	0	2	0	0	0	0	0	0	0	0	0	0	0	0	0	0	0	0	0	0	0	0	0	0	0	0	0	0	0	0	0	0
OTU_7224	Unassigned	Unassigned	Unassigned	Unassigned	Unassigned	Unassigned	Unassigned	332	3	9.71412e-07	0	0	0	0	0	3	0	0	0	0	0	0	0	0	0	0	0	0	0	0	0	0	0	0	0	0	0	0	0	0	0	0	0	0	0	0	0	0	0
OTU_7245	Unassigned	Unassigned	Unassigned	Unassigned	Unassigned	Unassigned	Unassigned	370	3	9.71412e-07	0	0	0	0	0	0	0	0	0	0	0	0	0	0	0	0	0	0	0	0	0	0	0	0	0	0	0	0	0	0	0	0	0	0	0	0	0	0	0
OTU_7248	Unassigned	Unassigned	Unassigned	Unassigned	Unassigned	Unassigned	Unassigned	334	3	9.71412e-07	0	0	0	0	0	0	0	0	0	0	0	0	0	0	0	0	0	0	0	0	0	0	0	0	0	0	0	0	0	0	0	0	0	0	0	0	0	0	0
OTU_7261	Unassigned	Unassigned	Unassigned	Unassigned	Unassigned	Unassigned	Unassigned	361	3	9.71412e-07	0	0	0	0	0	0	0	0	0	0	0	0	0	0	0	0	0	0	0	0	0	0	0	0	0	0	0	0	0	0	0	0	0	0	0	0	0	0	0
OTU_7262	Unassigned	Unassigned	Unassigned	Unassigned	Unassigned	Unassigned	Unassigned	459	3	9.71412e-07	0	0	0	0	0	0	0	0	0	0	0	0	0	0	0	0	0	0	0	3	0	0	0	0	0	0	0	0	0	0	0	0	0	0	0	0	0	0	0
OTU_7274	Unassigned	Unassigned	Unassigned	Unassigned	Unassigned	Unassigned	Unassigned	378	3	9.71412e-07	0	0	0	0	0	0	0	0	0	0	0	0	0	0	0	0	0	0	0	0	0	0	0	0	0	0	0	0	0	0	0	0	0	0	0	0	0	0	0
OTU_7282	Unassigned	Unassigned	Unassigned	Unassigned	Unassigned	Unassigned	Unassigned	346	3	9.71412e-07	0	0	0	0	0	0	0	0	0	0	0	0	0	0	0	0	0	0	0	0	0	0	0	0	0	0	0	0	0	0	0	0	0	0	0	0	3	0	0
OTU_7283	Unassigned	Unassigned	Unassigned	Unassigned	Unassigned	Unassigned	Unassigned	343	3	9.71412e-07	0	0	0	0	0	0	0	0	0	0	0	0	0	0	0	0	0	0	0	0	0	0	0	0	0	0	0	0	0	0	0	0	0	0	0	0	0	0	0
OTU_7302	Unassigned	Unassigned	Unassigned	Unassigned	Unassigned	Unassigned	Unassigned	421	3	9.71412e-07	0	0	0	0	0	0	0	0	0	0	0	0	0	0	0	0	0	0	0	0	0	0	0	0	0	0	0	0	0	0	0	0	0	0	0	0	0	0	0
OTU_7334	Unassigned	Unassigned	Unassigned	Unassigned	Unassigned	Unassigned	Unassigned	343	3	9.71412e-07	0	0	0	0	0	0	0	0	0	0	0	0	0	0	0	0	0	0	0	0	0	0	0	0	0	0	0	0	0	0	0	0	0	0	0	3	0	0	0
OTU_7358	Unassigned	Unassigned	Unassigned	Unassigned	Unassigned	Unassigned	Unassigned	351	3	9.71412e-07	0	0	0	0	0	0	0	0	0	0	0	0	0	0	0	0	0	0	0	0	0	0	0	0	0	0	0	0	0	0	0	0	0	0	0	0	0	0	0
OTU_7406	Unassigned	Unassigned	Unassigned	Unassigned	Unassigned	Unassigned	Unassigned	388	3	9.71412e-07	0	0	0	0	0	0	0	0	0	0	0	0	0	0	0	0	0	0	0	0	0	0	0	0	0	0	0	0	0	0	0	0	0	0	3	0	0	0	0
OTU_7411	Unassigned	Unassigned	Unassigned	Unassigned	Unassigned	Unassigned	Unassigned	288	3	9.71412e-07	0	0	0	0	0	0	0	0	0	0	0	0	0	0	0	0	0	0	0	0	0	0	0	0	0	0	0	0	0	0	0	0	0	0	0	0	0	0	0
OTU_7420	Unassigned	Unassigned	Unassigned	Unassigned	Unassigned	Unassigned	Unassigned	420	3	9.71412e-07	0	0	0	0	0	0	0	0	0	0	0	0	0	0	0	0	0	0	0	0	0	0	0	0	0	0	0	0	0	0	0	0	0	0	0	0	0	0	0
OTU_7440	Unassigned	Unassigned	Unassigned	Unassigned	Unassigned	Unassigned	Unassigned	341	3	9.71412e-07	0	0	0	0	0	0	0	0	0	0	0	0	0	0	0	0	0	0	0	0	0	0	0	0	0	0	0	0	0	0	0	0	0	0	0	0	0	0	0
OTU_7441	Unassigned	Unassigned	Unassigned	Unassigned	Unassigned	Unassigned	Unassigned	325	3	9.71412e-07	0	0	0	0	0	0	0	0	0	0	0	0	0	0	0	0	0	0	0	0	0	0	0	0	0	0	0	0	0	0	0	0	0	0	0	0	0	0	0
OTU_7462	Unassigned	Unassigned	Unassigned	Unassigned	Unassigned	Unassigned	Unassigned	349	3	9.71412e-07	0	0	0	0	0	0	0	0	0	0	0	0	0	0	0	0	0	0	0	0	0	0	0	0	0	0	0	0	0	0	0	0	0	0	0	0	0	0	0
OTU_7466	Unassigned	Unassigned	Unassigned	Unassigned	Unassigned	Unassigned	Unassigned	337	3	9.71412e-07	0	0	0	0	0	0	0	0	0	0	0	0	0	0	0	0	0	0	0	0	0	0	0	0	0	0	0	0	0	0	0	0	0	0	0	0	0	0	0
OTU_7476	Unassigned	Unassigned	Unassigned	Unassigned	Unassigned	Unassigned	Unassigned	384	3	9.71412e-07	0	0	0	0	0	0	0	0	0	0	0	0	0	0	0	0	0	0	0	0	0	0	0	0	0	0	0	0	0	0	0	0	0	0	0	0	0	0	0
OTU_7492	Unassigned	Unassigned	Unassigned	Unassigned	Unassigned	Unassigned	Unassigned	347	3	9.71412e-07	0	0	0	0	0	0	0	0	0	0	0	0	0	0	0	0	0	0	0	0	0	0	0	0	0	0	0	0	0	0	0	0	0	0	0	0	0	0	0
OTU_7494	Unassigned	Unassigned	Unassigned	Unassigned	Unassigned	Unassigned	Unassigned	363	3	9.71412e-07	0	0	0	0	0	0	0	0	0	0	0	0	0	0	0	0	0	0	0	0	0	0	0	0	0	0	0	0	0	0	0	0	0	0	0	0	0	0	0
OTU_7508	Unassigned	Unassigned	Unassigned	Unassigned	Unassigned	Unassigned	Unassigned	447	3	9.71412e-07	0	0	0	0	0	0	0	0	0	0	0	0	0	0	0	0	0	0	0	0	0	0	0	0	0	0	0	0	0	0	0	0	0	0	0	0	0	0	0
OTU_7515	Unassigned	Unassigned	Unassigned	Unassigned	Unassigned	Unassigned	Unassigned	352	3	9.71412e-07	0	0	0	0	0	0	0	0	0	0	0	0	0	0	0	0	0	0	0	0	0	0	0	0	0	0	0	0	0	0	0	0	0	0	0	0	0	0	0
OTU_7516	Unassigned	Unassigned	Unassigned	Unassigned	Unassigned	Unassigned	Unassigned	331	3	9.71412e-07	0	0	0	0	0	0	0	0	0	0	0	0	0	0	0	0	0	0	0	0	0	0	0	0	0	0	0	0	0	0	0	0	0	0	0	3	0	0	0
OTU_7521	Unassigned	Unassigned	Unassigned	Unassigned	Unassigned	Unassigned	Unassigned	294	3	9.71412e-07	0	0	0	0	0	0	0	0	0	0	0	0	0	0	0	0	0	0	0	0	0	0	0	0	0	0	0	0	0	0	0	0	0	0	0	0	0	0	0
OTU_7522	Unassigned	Unassigned	Unassigned	Unassigned	Unassigned	Unassigned	Unassigned	368	3	9.71412e-07	0	0	0	0	0	0	0	0	0	0	0	0	0	0	0	0	0	0	0	0	3	0	0	0	0	0	0	0	0	0	0	0	0	0	0	0	0	0	0
OTU_7593	Unassigned	Unassigned	Unassigned	Unassigned	Unassigned	Unassigned	Unassigned	356	3	9.71412e-07	0	0	0	0	0	0	0	0	0	0	0	0	0	0	0	0	0	0	0	0	0	0	0	0	0	0	0	0	0	0	0	0	0	0	0	0	0	0	0
OTU_7598	Unassigned	Unassigned	Unassigned	Unassigned	Unassigned	Unassigned	Unassigned	324	3	9.71412e-07	0	0	0	0	0	0	0	0	0	0	0	0	0	0	0	0	0	0	0	0	0	0	0	0	0	0	0	0	0	0	0	0	0	0	0	0	0	0	0
OTU_7605	Unassigned	Unassigned	Unassigned	Unassigned	Unassigned	Unassigned	Unassigned	354	3	9.71412e-07	0	0	0	0	0	0	0	0	0	0	0	0	0	0	0	0	0	0	0	0	0	0	0	0	0	0	0	0	0	0	0	0	0	0	0	0	0	0	0
OTU_7606	Unassigned	Unassigned	Unassigned	Unassigned	Unassigned	Unassigned	Unassigned	396	3	9.71412e-07	0	0	0	0	0	0	0	0	0	0	0	0	0	0	0	0	0	0	0	0	0	0	0	0	0	0	0	0	0	0	0	0	0	0	0	0	0	0	0
OTU_7627	Unassigned	Unassigned	Unassigned	Unassigned	Unassigned	Unassigned	Unassigned	340	3	9.71412e-07	0	0	0	0	0	0	0	0	0	0	0	0	0	0	0	0	0	0	0	0	0	0	0	0	0	0	0	0	0	0	0	0	0	0	0	0	0	0	0
OTU_7641	Unassigned	Unassigned	Unassigned	Unassigned	Unassigned	Unassigned	Unassigned	320	3	9.71412e-07	0	0	0	0	0	0	0	0	0	0	0	0	0	0	0	0	0	0	0	0	0	0	0	0	0	0	0	0	0	0	0	0	0	0	0	0	0	0	0
OTU_7642	Unassigned	Unassigned	Unassigned	Unassigned	Unassigned	Unassigned	Unassigned	322	3	9.71412e-07	0	0	0	0	0	0	0	0	0	0	0	0	0	0	0	0	0	0	0	0	0	0	0	0	0	0	0	0	0	0	0	0	0	0	0	0	0	0	0
OTU_7647	Unassigned	Unassigned	Unassigned	Unassigned	Unassigned	Unassigned	Unassigned	363	3	9.71412e-07	0	0	0	0	0	0	3	0	0	0	0	0	0	0	0	0	0	0	0	0	0	0	0	0	0	0	0	0	0	0	0	0	0	0	0	0	0	0	0
OTU_7651	Unassigned	Unassigned	Unassigned	Unassigned	Unassigned	Unassigned	Unassigned	268	3	9.71412e-07	0	0	0	0	0	0	0	0	0	0	0	0	0	0	0	0	0	0	0	0	0	0	0	0	0	0	0	0	0	0	0	0	0	0	0	0	0	0	0
OTU_7654	Unassigned	Unassigned	Unassigned	Unassigned	Unassigned	Unassigned	Unassigned	287	3	9.71412e-07	0	0	0	0	0	0	0	0	0	0	0	0	0	0	0	0	0	0	0	0	0	0	0	0	0	0	0	0	0	0	0	0	0	0	0	0	0	0	0
OTU_7660	Unassigned	Unassigned	Unassigned	Unassigned	Unassigned	Unassigned	Unassigned	325	3	9.71412e-07	0	0	0	0	0	0	0	0	0	0	0	0	0	0	0	0	0	0	0	0	0	0	0	0	0	0	0	0	0	0	0	0	0	0	0	0	0	0	0
OTU_7668	Unassigned	Unassigned	Unassigned	Unassigned	Unassigned	Unassigned	Unassigned	425	3	9.71412e-07	0	0	0	0	0	0	0	0	0	0	0	0	0	0	0	0	0	0	0	0	0	0	0	0	0	0	0	0	0	0	0	0	0	0	0	0	0	0	0
OTU_7703	Unassigned	Unassigned	Unassigned	Unassigned	Unassigned	Unassigned	Unassigned	286	3	9.71412e-07	0	0	0	0	0	0	0	0	0	0	0	0	0	0	0	0	0	0	0	0	0	0	0	0	0	0	0	0	0	0	0	0	0	0	0	0	0	0	0
OTU_7737	Unassigned	Unassigned	Unassigned	Unassigned	Unassigned	Unassigned	Unassigned	387	3	9.71412e-07	0	0	0	0	0	0	0	0	0	0	0	0	0	0	0	0	0	0	0	0	0	0	0	0	0	0	0	0	0	0	0	0	0	0	0	0	0	0	0
OTU_7759	Unassigned	Unassigned	Unassigned	Unassigned	Unassigned	Unassigned	Unassigned	424	3	9.71412e-07	0	0	0	0	0	0	0	0	0	0	0	0	0	0	0	0	0	0	0	0	0	0	0	0	0	0	0	0	0	0	0	0	0	0	0	0	0	0	0
OTU_7763	Unassigned	Unassigned	Unassigned	Unassigned	Unassigned	Unassigned	Unassigned	389	3	9.71412e-07	0	0	0	0	0	0	0	0	0	0	0	0	0	0	0	0	0	0	0	0	0	0	0	0	0	0	0	0	0	0	0	0	0	0	0	0	0	0	0
OTU_7808	Unassigned	Unassigned	Unassigned	Unassigned	Unassigned	Unassigned	Unassigned	346	3	9.71412e-07	0	0	0	0	0	0	0	0	0	0	0	0	0	0	0	0	0	0	0	0	0	0	0	0	0	0	0	0	2	0	0	0	0	0	0	0	0	0	0
OTU_7819	Unassigned	Unassigned	Unassigned	Unassigned	Unassigned	Unassigned	Unassigned	257	3	9.71412e-07	0	0	0	0	0	0	0	0	0	0	0	0	0	0	0	0	0	0	0	0	0	0	0	0	0	0	0	0	0	0	0	0	0	0	0	0	0	0	0
OTU_7822	Unassigned	Unassigned	Unassigned	Unassigned	Unassigned	Unassigned	Unassigned	328	3	9.71412e-07	0	0	0	0	0	0	0	0	0	0	0	0	0	0	0	0	0	0	0	0	0	0	0	0	0	0	0	0	0	0	0	0	0	0	0	0	0	0	0
OTU_7827	Unassigned	Unassigned	Unassigned	Unassigned	Unassigned	Unassigned	Unassigned	348	3	9.71412e-07	0	0	0	0	0	0	0	0	0	0	0	0	0	0	0	0	0	0	0	0	0	0	0	0	0	0	0	0	0	0	0	3	0	0	0	0	0	0	0
OTU_7835	Unassigned	Unassigned	Unassigned	Unassigned	Unassigned	Unassigned	Unassigned	346	3	9.71412e-07	0	0	0	0	0	0	0	0	0	0	0	0	0	0	0	0	0	0	0	0	0	0	0	0	0	0	0	0	0	0	0	0	0	0	0	0	0	0	0
OTU_7847	Unassigned	Unassigned	Unassigned	Unassigned	Unassigned	Unassigned	Unassigned	339	3	9.71412e-07	0	0	0	0	0	0	0	0	0	0	0	0	0	0	0	0	0	0	0	0	0	0	0	0	0	0	0	0	0	0	0	0	0	0	0	0	0	0	0
OTU_7865	Unassigned	Unassigned	Unassigned	Unassigned	Unassigned	Unassigned	Unassigned	342	3	9.71412e-07	0	0	3	0	0	0	0	0	0	0	0	0	0	0	0	0	0	0	0	0	0	0	0	0	0	0	0	0	0	0	0	0	0	0	0	0	0	0	0
OTU_7875	Unassigned	Unassigned	Unassigned	Unassigned	Unassigned	Unassigned	Unassigned	353	3	9.71412e-07	0	0	0	0	0	0	0	0	0	0	0	0	0	0	0	0	0	0	0	0	0	0	0	0	0	0	0	0	0	0	0	0	0	0	0	0	0	0	0
OTU_7883	Unassigned	Unassigned	Unassigned	Unassigned	Unassigned	Unassigned	Unassigned	356	3	9.71412e-07	0	0	0	0	0	0	0	0	0	0	0	0	0	0	0	0	0	0	0	0	0	0	0	0	0	0	0	0	0	0	0	0	0	0	0	0	0	0	0
OTU_7885	Unassigned	Unassigned	Unassigned	Unassigned	Unassigned	Unassigned	Unassigned	416	3	9.71412e-07	0	0	0	0	0	0	0	0	0	0	0	0	0	0	0	0	0	0	0	0	0	0	0	0	0	0	0	0	0	0	0	0	0	0	0	0	0	0	0
OTU_7900	Unassigned	Unassigned	Unassigned	Unassigned	Unassigned	Unassigned	Unassigned	345	3	9.71412e-07	0	0	0	0	0	0	0	0	0	0	0	0	0	0	0	0	0	0	0	0	0	0	0	0	0	0	0	0	0	0	0	0	0	0	0	0	0	0	0
OTU_7929	Unassigned	Unassigned	Unassigned	Unassigned	Unassigned	Unassigned	Unassigned	449	3	9.71412e-07	0	0	0	0	0	0	0	0	0	0	0	0	0	0	0	0	0	0	0	0	0	0	0	0	0	0	0	0	0	0	0	0	0	0	0	0	0	0	0
OTU_7938	Unassigned	Unassigned	Unassigned	Unassigned	Unassigned	Unassigned	Unassigned	326	3	9.71412e-07	0	0	0	0	0	0	0	0	0	0	0	0	0	0	0	0	0	0	0	0	0	0	0	0	0	0	0	0	3	0	0	0	0	0	0	0	0	0	0
OTU_7942	Unassigned	Unassigned	Unassigned	Unassigned	Unassigned	Unassigned	Unassigned	483	3	9.71412e-07	0	0	0	0	0	0	0	0	0	0	0	0	0	0	0	0	0	0	0	0	0	0	0	0	0	0	0	0	0	0	0	0	0	3	0	0	0	0	0
OTU_7951	Unassigned	Unassigned	Unassigned	Unassigned	Unassigned	Unassigned	Unassigned	355	3	9.71412e-07	0	0	0	0	0	0	0	0	0	0	0	0	0	0	0	0	0	0	0	0	0	0	0	0	3	0	0	0	0	0	0	0	0	0	0	0	0	0	0
OTU_7952	Unassigned	Unassigned	Unassigned	Unassigned	Unassigned	Unassigned	Unassigned	345	3	9.71412e-07	0	0	0	0	0	0	0	0	0	0	0	0	0	0	0	0	0	0	0	0	0	0	0	0	0	0	0	0	0	0	0	3	0	0	0	0	0	0	0
OTU_7990	Unassigned	Unassigned	Unassigned	Unassigned	Unassigned	Unassigned	Unassigned	468	3	9.71412e-07	0	0	0	0	0	0	0	0	0	0	0	0	0	0	0	0	0	0	0	0	0	0	0	0	0	0	0	0	0	0	0	0	0	0	0	0	0	0	0
OTU_7999	Unassigned	Unassigned	Unassigned	Unassigned	Unassigned	Unassigned	Unassigned	359	3	9.71412e-07	0	0	0	0	0	0	0	0	0	0	0	0	0	0	0	0	0	0	0	0	0	0	0	0	0	0	0	0	0	0	0	0	0	0	0	0	0	0	0
OTU_8001	Unassigned	Unassigned	Unassigned	Unassigned	Unassigned	Unassigned	Unassigned	334	3	9.71412e-07	0	0	0	0	0	0	0	0	0	0	0	0	0	0	0	0	0	0	0	0	0	0	0	0	0	0	0	0	0	0	0	0	0	0	0	0	0	0	0
OTU_8012	Unassigned	Unassigned	Unassigned	Unassigned	Unassigned	Unassigned	Unassigned	385	3	9.71412e-07	0	0	0	0	0	0	0	0	0	0	0	0	0	0	0	0	0	0	0	0	0	0	0	0	0	0	0	0	0	0	0	0	0	0	0	0	0	0	0
OTU_8028	Unassigned	Unassigned	Unassigned	Unassigned	Unassigned	Unassigned	Unassigned	350	3	9.71412e-07	0	0	0	0	0	0	0	0	3	0	0	0	0	0	0	0	0	0	0	0	0	0	0	0	0	0	0	0	0	0	0	0	0	0	0	0	0	0	0
OTU_8057	Unassigned	Unassigned	Unassigned	Unassigned	Unassigned	Unassigned	Unassigned	338	3	9.71412e-07	0	0	0	0	0	0	0	0	3	0	0	0	0	0	0	0	0	0	0	0	0	0	0	0	0	0	0	0	0	0	0	0	0	0	0	0	0	0	0
OTU_8116	Unassigned	Unassigned	Unassigned	Unassigned	Unassigned	Unassigned	Unassigned	289	3	9.71412e-07	0	0	0	0	0	0	0	0	0	3	0	0	0	0	0	0	0	0	0	0	0	0	0	0	0	0	0	0	0	0	0	0	0	0	0	0	0	0	0
OTU_8118	Unassigned	Unassigned	Unassigned	Unassigned	Unassigned	Unassigned	Unassigned	339	3	9.71412e-07	0	0	0	0	0	0	0	0	0	0	0	0	0	0	0	0	0	0	0	0	0	0	0	0	0	0	0	0	0	0	0	0	0	0	0	0	0	0	0
OTU_8129	Unassigned	Unassigned	Unassigned	Unassigned	Unassigned	Unassigned	Unassigned	383	3	9.71412e-07	0	0	0	0	0	0	0	0	0	0	0	0	0	3	0	0	0	0	0	0	0	0	0	0	0	0	0	0	0	0	0	0	0	0	0	0	0	0	0
OTU_8156	Unassigned	Unassigned	Unassigned	Unassigned	Unassigned	Unassigned	Unassigned	354	3	9.71412e-07	0	0	0	0	0	0	0	0	0	0	0	0	0	0	0	0	0	0	0	0	0	0	0	0	0	0	0	0	0	0	0	0	0	0	0	0	0	0	0
OTU_8179	Unassigned	Unassigned	Unassigned	Unassigned	Unassigned	Unassigned	Unassigned	349	3	9.71412e-07	0	0	0	0	0	0	0	0	0	0	0	0	0	0	0	0	0	0	0	3	0	0	0	0	0	0	0	0	0	0	0	0	0	0	0	0	0	0	0
OTU_8184	Unassigned	Unassigned	Unassigned	Unassigned	Unassigned	Unassigned	Unassigned	447	3	9.71412e-07	0	0	0	0	0	0	0	0	0	0	0	0	0	0	0	0	0	0	0	0	0	0	3	0	0	0	0	0	0	0	0	0	0	0	0	0	0	0	0
OTU_8206	Unassigned	Unassigned	Unassigned	Unassigned	Unassigned	Unassigned	Unassigned	378	3	9.71412e-07	0	0	0	0	0	0	0	0	0	0	0	0	0	0	0	0	0	0	0	0	0	0	0	0	0	0	0	0	0	0	0	0	0	3	0	0	0	0	0
OTU_8207	Unassigned	Unassigned	Unassigned	Unassigned	Unassigned	Unassigned	Unassigned	383	3	9.71412e-07	0	0	0	0	0	0	0	0	0	0	0	0	0	0	0	0	0	0	0	0	0	0	0	0	0	0	0	0	0	0	0	0	0	0	0	0	0	0	0
OTU_8222	Unassigned	Unassigned	Unassigned	Unassigned	Unassigned	Unassigned	Unassigned	281	3	9.71412e-07	0	0	3	0	0	0	0	0	0	0	0	0	0	0	0	0	0	0	0	0	0	0	0	0	0	0	0	0	0	0	0	0	0	0	0	0	0	0	0
OTU_8264	Unassigned	Unassigned	Unassigned	Unassigned	Unassigned	Unassigned	Unassigned	348	3	9.71412e-07	0	0	0	0	0	0	0	0	0	0	0	0	0	0	0	0	0	0	0	0	0	0	0	0	0	0	0	0	0	0	0	0	0	0	0	0	3	0	0
OTU_8267	Unassigned	Unassigned	Unassigned	Unassigned	Unassigned	Unassigned	Unassigned	453	3	9.71412e-07	0	0	0	0	0	0	0	0	0	0	0	0	0	0	0	0	0	0	0	0	0	0	0	0	0	0	0	0	0	0	0	0	0	0	0	0	0	0	0
OTU_8268	Unassigned	Unassigned	Unassigned	Unassigned	Unassigned	Unassigned	Unassigned	333	3	9.71412e-07	0	0	0	0	0	0	0	0	0	0	0	0	0	0	0	0	0	0	0	0	0	0	0	0	0	0	0	0	0	0	0	0	0	0	0	0	0	0	0
OTU_8284	Unassigned	Unassigned	Unassigned	Unassigned	Unassigned	Unassigned	Unassigned	351	3	9.71412e-07	0	0	0	0	0	0	0	0	0	0	0	0	0	0	0	0	0	0	0	0	0	0	0	0	0	0	0	0	0	0	0	0	0	0	0	0	0	0	0
OTU_8295	Unassigned	Unassigned	Unassigned	Unassigned	Unassigned	Unassigned	Unassigned	395	3	9.71412e-07	0	0	0	0	0	0	0	0	0	0	0	0	0	0	0	0	0	0	0	0	3	0	0	0	0	0	0	0	0	0	0	0	0	0	0	0	0	0	0
OTU_8296	Unassigned	Unassigned	Unassigned	Unassigned	Unassigned	Unassigned	Unassigned	389	3	9.71412e-07	0	0	0	0	0	0	0	0	0	0	0	0	0	0	0	0	0	0	0	0	0	0	0	0	0	0	0	0	0	0	0	0	0	0	3	0	0	0	0
OTU_8304	Unassigned	Unassigned	Unassigned	Unassigned	Unassigned	Unassigned	Unassigned	347	3	9.71412e-07	0	0	0	0	0	0	0	0	0	0	0	0	0	0	0	0	0	3	0	0	0	0	0	0	0	0	0	0	0	0	0	0	0	0	0	0	0	0	0
OTU_8305	Unassigned	Unassigned	Unassigned	Unassigned	Unassigned	Unassigned	Unassigned	341	3	9.71412e-07	0	0	0	0	0	0	0	0	0	0	0	0	0	0	0	0	0	3	0	0	0	0	0	0	0	0	0	0	0	0	0	0	0	0	0	0	0	0	0
OTU_8310	Unassigned	Unassigned	Unassigned	Unassigned	Unassigned	Unassigned	Unassigned	477	3	9.71412e-07	0	0	0	0	0	0	0	0	0	0	0	0	0	0	0	0	0	0	0	0	0	0	0	0	0	0	0	0	0	0	0	0	0	0	0	0	0	0	0
OTU_8324	Unassigned	Unassigned	Unassigned	Unassigned	Unassigned	Unassigned	Unassigned	363	3	9.71412e-07	0	0	0	0	0	0	0	0	0	0	0	0	0	0	0	0	0	0	0	0	0	0	0	0	0	0	0	0	0	0	0	0	0	0	0	0	0	0	0
OTU_8329	Unassigned	Unassigned	Unassigned	Unassigned	Unassigned	Unassigned	Unassigned	264	3	9.71412e-07	0	0	0	0	0	0	0	0	0	0	0	0	0	0	3	0	0	0	0	0	0	0	0	0	0	0	0	0	0	0	0	0	0	0	0	0	0	0	0
OTU_8345	Unassigned	Unassigned	Unassigned	Unassigned	Unassigned	Unassigned	Unassigned	434	3	9.71412e-07	0	0	0	0	0	0	0	0	0	0	0	3	0	0	0	0	0	0	0	0	0	0	0	0	0	0	0	0	0	0	0	0	0	0	0	0	0	0	0
OTU_8355	Unassigned	Unassigned	Unassigned	Unassigned	Unassigned	Unassigned	Unassigned	374	3	9.71412e-07	0	0	0	0	0	0	0	0	0	0	0	0	0	0	0	0	0	0	0	0	0	0	0	0	0	0	0	0	0	0	0	0	0	0	0	0	0	0	0
OTU_8359	Unassigned	Unassigned	Unassigned	Unassigned	Unassigned	Unassigned	Unassigned	447	3	9.71412e-07	0	0	0	0	0	0	0	0	0	0	0	0	3	0	0	0	0	0	0	0	0	0	0	0	0	0	0	0	0	0	0	0	0	0	0	0	0	0	0
OTU_8380	Unassigned	Unassigned	Unassigned	Unassigned	Unassigned	Unassigned	Unassigned	254	3	9.71412e-07	0	0	0	0	0	0	0	0	0	0	0	0	0	0	0	0	0	0	0	0	0	0	0	0	0	0	0	0	0	0	0	0	0	0	0	0	0	0	0
OTU_8391	Unassigned	Unassigned	Unassigned	Unassigned	Unassigned	Unassigned	Unassigned	360	3	9.71412e-07	0	0	0	0	0	0	0	0	0	0	0	0	0	3	0	0	0	0	0	0	0	0	0	0	0	0	0	0	0	0	0	0	0	0	0	0	0	0	0
OTU_8418	Unassigned	Unassigned	Unassigned	Unassigned	Unassigned	Unassigned	Unassigned	445	3	9.71412e-07	0	0	0	0	0	0	0	3	0	0	0	0	0	0	0	0	0	0	0	0	0	0	0	0	0	0	0	0	0	0	0	0	0	0	0	0	0	0	0
OTU_8419	Unassigned	Unassigned	Unassigned	Unassigned	Unassigned	Unassigned	Unassigned	337	3	9.71412e-07	0	0	0	0	0	0	0	3	0	0	0	0	0	0	0	0	0	0	0	0	0	0	0	0	0	0	0	0	0	0	0	0	0	0	0	0	0	0	0
OTU_8426	Unassigned	Unassigned	Unassigned	Unassigned	Unassigned	Unassigned	Unassigned	455	3	9.71412e-07	0	0	0	0	0	0	0	0	0	0	0	0	0	3	0	0	0	0	0	0	0	0	0	0	0	0	0	0	0	0	0	0	0	0	0	0	0	0	0
OTU_8428	Unassigned	Unassigned	Unassigned	Unassigned	Unassigned	Unassigned	Unassigned	371	3	9.71412e-07	0	0	0	0	0	0	0	0	0	0	0	0	0	0	0	0	0	0	0	0	0	0	0	0	0	0	0	0	0	0	0	0	0	0	0	0	0	0	0
OTU_8488	Unassigned	Unassigned	Unassigned	Unassigned	Unassigned	Unassigned	Unassigned	317	3	9.71412e-07	0	0	0	0	0	0	0	0	0	0	0	0	0	0	0	0	0	0	0	0	0	0	0	0	0	0	0	0	0	0	0	0	0	0	0	0	0	0	0
OTU_8491	Unassigned	Unassigned	Unassigned	Unassigned	Unassigned	Unassigned	Unassigned	348	3	9.71412e-07	0	0	0	0	0	0	0	0	0	0	0	0	0	0	0	0	0	0	0	0	0	0	0	0	0	0	0	0	0	0	0	0	0	0	0	0	0	0	0
OTU_8498	Unassigned	Unassigned	Unassigned	Unassigned	Unassigned	Unassigned	Unassigned	379	3	9.71412e-07	0	0	0	0	0	0	0	0	0	0	0	0	0	0	0	0	3	0	0	0	0	0	0	0	0	0	0	0	0	0	0	0	0	0	0	0	0	0	0
OTU_8537	Unassigned	Unassigned	Unassigned	Unassigned	Unassigned	Unassigned	Unassigned	336	3	9.71412e-07	0	0	0	0	0	0	0	0	0	0	0	0	0	0	0	0	0	0	0	0	0	0	0	0	0	0	0	0	0	0	0	0	0	0	0	0	0	0	0
OTU_8539	Unassigned	Unassigned	Unassigned	Unassigned	Unassigned	Unassigned	Unassigned	397	3	9.71412e-07	0	0	0	0	0	0	0	0	0	0	0	0	0	0	0	0	0	0	0	0	0	0	0	0	0	0	0	0	0	0	0	0	0	0	0	0	0	0	0
OTU_8543	Unassigned	Unassigned	Unassigned	Unassigned	Unassigned	Unassigned	Unassigned	471	3	9.71412e-07	0	0	0	0	0	0	0	0	0	0	0	0	0	0	0	0	0	0	0	0	0	0	0	0	0	0	0	0	0	0	0	0	0	0	0	0	0	0	0
OTU_8545	Unassigned	Unassigned	Unassigned	Unassigned	Unassigned	Unassigned	Unassigned	442	3	9.71412e-07	0	0	0	0	0	0	0	0	0	0	0	0	0	0	0	0	0	0	0	0	0	0	0	0	0	0	0	0	0	0	0	0	0	0	0	0	0	0	0
OTU_8551	Unassigned	Unassigned	Unassigned	Unassigned	Unassigned	Unassigned	Unassigned	375	3	9.71412e-07	0	0	0	0	0	0	0	0	0	0	0	0	0	0	0	0	0	0	0	0	0	0	0	0	0	0	0	0	0	0	0	0	0	0	0	0	3	0	0
OTU_8572	Unassigned	Unassigned	Unassigned	Unassigned	Unassigned	Unassigned	Unassigned	327	3	9.71412e-07	0	0	0	0	0	0	0	0	0	0	0	0	0	0	0	0	0	0	0	0	0	0	0	0	0	0	0	0	0	0	0	0	0	0	3	0	0	0	0
OTU_8598	Unassigned	Unassigned	Unassigned	Unassigned	Unassigned	Unassigned	Unassigned	305	3	9.71412e-07	0	0	0	0	0	0	0	0	0	0	0	0	0	0	0	0	0	3	0	0	0	0	0	0	0	0	0	0	0	0	0	0	0	0	0	0	0	0	0
OTU_8608	Unassigned	Unassigned	Unassigned	Unassigned	Unassigned	Unassigned	Unassigned	315	3	9.71412e-07	0	1	0	0	0	0	0	2	0	0	0	0	0	0	0	0	0	0	0	0	0	0	0	0	0	0	0	0	0	0	0	0	0	0	0	0	0	0	0
OTU_8627	Unassigned	Unassigned	Unassigned	Unassigned	Unassigned	Unassigned	Unassigned	339	3	9.71412e-07	0	0	0	0	3	0	0	0	0	0	0	0	0	0	0	0	0	0	0	0	0	0	0	0	0	0	0	0	0	0	0	0	0	0	0	0	0	0	0
OTU_8635	Unassigned	Unassigned	Unassigned	Unassigned	Unassigned	Unassigned	Unassigned	284	3	9.71412e-07	0	0	0	0	0	0	0	0	0	0	0	0	0	0	0	0	0	0	0	0	0	0	0	0	0	0	0	0	0	0	0	0	0	0	0	0	0	0	0
OTU_8640	Unassigned	Unassigned	Unassigned	Unassigned	Unassigned	Unassigned	Unassigned	352	3	9.71412e-07	0	0	0	0	0	0	0	0	0	0	0	0	0	0	0	0	0	0	0	0	0	0	0	0	0	0	0	0	0	0	0	0	0	0	0	0	0	0	0
OTU_8648	Unassigned	Unassigned	Unassigned	Unassigned	Unassigned	Unassigned	Unassigned	337	3	9.71412e-07	0	0	0	0	0	0	0	0	0	0	0	0	0	0	0	0	0	0	0	0	0	0	0	0	0	0	0	0	0	0	0	0	0	0	0	0	0	0	0
OTU_8667	Unassigned	Unassigned	Unassigned	Unassigned	Unassigned	Unassigned	Unassigned	431	3	9.71412e-07	0	0	0	0	0	0	0	0	0	0	0	0	0	0	0	0	0	0	0	0	0	0	0	3	0	0	0	0	0	0	0	0	0	0	0	0	0	0	0
OTU_8683	Unassigned	Unassigned	Unassigned	Unassigned	Unassigned	Unassigned	Unassigned	351	3	9.71412e-07	0	0	0	0	0	0	0	0	0	0	0	0	0	0	0	0	0	0	0	0	0	0	0	0	0	0	0	0	0	0	0	0	0	0	0	0	0	0	0
OTU_8687	Unassigned	Unassigned	Unassigned	Unassigned	Unassigned	Unassigned	Unassigned	356	3	9.71412e-07	0	0	0	0	3	0	0	0	0	0	0	0	0	0	0	0	0	0	0	0	0	0	0	0	0	0	0	0	0	0	0	0	0	0	0	0	0	0	0
OTU_8721	Unassigned	Unassigned	Unassigned	Unassigned	Unassigned	Unassigned	Unassigned	468	3	9.71412e-07	0	0	0	0	0	0	0	0	0	0	0	0	0	0	0	0	0	0	0	0	0	0	0	0	0	0	0	0	0	0	0	0	0	0	0	0	0	0	0
OTU_8722	Unassigned	Unassigned	Unassigned	Unassigned	Unassigned	Unassigned	Unassigned	430	3	9.71412e-07	0	0	0	0	0	0	0	0	0	0	0	0	0	0	0	0	0	0	0	0	0	0	0	0	0	0	0	0	0	0	0	0	0	0	0	0	0	0	0
OTU_8749	Unassigned	Unassigned	Unassigned	Unassigned	Unassigned	Unassigned	Unassigned	325	3	9.71412e-07	0	0	0	0	0	0	0	0	0	0	0	0	0	0	0	0	0	0	0	0	0	0	0	3	0	0	0	0	0	0	0	0	0	0	0	0	0	0	0
OTU_8772	Unassigned	Unassigned	Unassigned	Unassigned	Unassigned	Unassigned	Unassigned	356	3	9.71412e-07	0	0	0	0	0	0	0	3	0	0	0	0	0	0	0	0	0	0	0	0	0	0	0	0	0	0	0	0	0	0	0	0	0	0	0	0	0	0	0
OTU_8811	Unassigned	Unassigned	Unassigned	Unassigned	Unassigned	Unassigned	Unassigned	425	3	9.71412e-07	0	0	0	0	0	0	0	0	0	0	0	0	0	0	0	0	0	0	0	0	0	0	0	0	0	0	0	0	0	0	0	0	0	0	3	0	0	0	0
OTU_8812	Unassigned	Unassigned	Unassigned	Unassigned	Unassigned	Unassigned	Unassigned	356	3	9.71412e-07	3	0	0	0	0	0	0	0	0	0	0	0	0	0	0	0	0	0	0	0	0	0	0	0	0	0	0	0	0	0	0	0	0	0	0	0	0	0	0
OTU_8821	Unassigned	Unassigned	Unassigned	Unassigned	Unassigned	Unassigned	Unassigned	371	3	9.71412e-07	0	0	0	0	0	0	0	0	0	0	0	0	0	0	0	0	0	0	0	0	0	0	0	0	0	0	0	0	0	0	0	0	0	0	0	0	0	0	0
OTU_8839	Unassigned	Unassigned	Unassigned	Unassigned	Unassigned	Unassigned	Unassigned	408	3	9.71412e-07	3	0	0	0	0	0	0	0	0	0	0	0	0	0	0	0	0	0	0	0	0	0	0	0	0	0	0	0	0	0	0	0	0	0	0	0	0	0	0
OTU_8840	Unassigned	Unassigned	Unassigned	Unassigned	Unassigned	Unassigned	Unassigned	339	3	9.71412e-07	3	0	0	0	0	0	0	0	0	0	0	0	0	0	0	0	0	0	0	0	0	0	0	0	0	0	0	0	0	0	0	0	0	0	0	0	0	0	0
OTU_8843	Unassigned	Unassigned	Unassigned	Unassigned	Unassigned	Unassigned	Unassigned	344	3	9.71412e-07	0	0	0	0	0	0	0	0	0	0	0	0	0	0	0	0	0	0	0	0	0	0	0	0	0	0	0	0	0	0	0	0	0	0	0	0	0	0	0
[truncated: 4,992 more rows]
[truncated: 59 more columns]
